# Supplementary material
Source: Research Square preprint supplement (doi:10.21203/rs.3.rs-8638016/v1)
Supplement: Supplementary file 1 [file 094ec71915dc426ea5418c51.xlsx]

## Sheet: Sheet1
1. Overview This supplementary document provides detailed documentation of the semantic coding scheme, coding procedures, and inter-coder reliability measures used in the analysis of Chinese public university mottos. The materials are intended to enhance methodological transparency and enable editors and referees to verify and scrutinize the analytic process.
2. Semantic Coding Scheme
Table1. Semantic Coding Scheme for University Motto Analysis
Category Code	Category Name	Operational Definition	Inclusion Criteria	Exclusion / Boundary Rules	Typical Lexical or Semantic Indicato
MOR	Morality and Virtue	Values related to ethical cultivation, moral integrity, and normative self-regulation, emphasizing character formation and moral responsibility.	Expressions foregrounding ethical self-cultivation, virtue, integrity, sincerity, benevolence, or moral ideals guiding personal and institutional conduct.	Excludes references to effort or aspiration unless explicitly framed as moral cultivation; excludes professional ethics unless tied to general moral virtue rather than occupational norms.	德、明德、修德、仁、义、诚、信、忠、善、敬、朴；classical allusions emphasizing moral self-cultivation (e.g., 木直中绳).
SCH	Scholarship and Knowledge	Values emphasizing intellectual inquiry, truth-seeking, rational understanding, and the pursuit or transmission of knowledge.	Explicit or implicit references to learning, knowing, reasoning, academic inquiry, or epistemic ideals associated with universities as knowledge institutions.	Excludes practical application unless knowledge is clearly subordinated to action (then ACT); excludes professional skill training unless framed as general scholarship.	学、知、理、智、问、思、博学、慎思、求是；implicit references to intellectual inquiry.
ACT	Action and Practice	Values highlighting the unity of knowledge and action, practical engagement, and the application of learning to real-world contexts.	Expressions stressing practice, application, usefulness, social contribution, or pragmatic realization of values or knowledge.	Excludes routine effort without application (DIL); excludes goal-oriented aspiration without action (WILL).	行、用、致用、务实、求实、知行合一；phrases indicating realization through action.
DIL	Diligence and Perseverance	Process-oriented qualities of sustained effort, discipline, and perseverance in learning or self-cultivation.	References to diligence, self-discipline, carefulness, sustained effort, or gradual self-improvement.	Excludes aspiration or ambition oriented toward future achievement (WILL); excludes effort explicitly framed as moral cultivation (MOR).	勤、笃（非与学/行直接连用）、慎、俭、精业；implicit emphasis on sustained effort.
WILL	Willpower and Aspiration	Goal-oriented expressions emphasizing ambition, aspiration, self-strengthening, and future-oriented achievement.	Statements foregrounding ideals, aspirations, striving toward goals, or self-transcendence driven by will and purpose.	Excludes process-oriented diligence without explicit goals (DIL); excludes professional excellence unless framed as aspirational identity.	志、自强、奋进、砺志、弘毅、图强、卓越；implicit goal-oriented narratives.
INNO	Innovation and Openness	Values related to creativity, transformation, openness to new ideas, and adaptability to change.	Explicit or implicit endorsement of innovation, reform, openness, or forward-looking change.	Excludes general aspiration without reference to novelty or openness; excludes professional skill upgrading unless innovation is foregrounded.	新、创新、开拓、开放、致新；semantic emphasis on change and openness.
PROF	Professional Excellence	Emphasis on specialized competence, technical expertise, and professional ethics associated with specific disciplines or occupations.	References to disciplinary mastery, technical skill, vocational mission, or profession-specific responsibility.	Excludes general scholarship (SCH) and general moral virtue (MOR) unless explicitly tied to occupational roles.	精技、精术、业精、强能、善医；implicit references to occupational mission (e.g., policing, medicine).
INCL	Inclusiveness and Tolerance	Values promoting pluralism, coexistence, openness to diversity, and harmonious integration of differences.	Expressions emphasizing inclusivity, harmony, coexistence, or tolerance of diversity.	Excludes general openness framed as innovation (INNO) rather than social pluralism.	海纳百川、和而不同、兼收并蓄；implicit pluralistic metaphors.
REAS	Reasoning and Reflection	Values highlighting critical thinking, reflective judgment, rational deliberation, and intellectual discernment.	References to reflection, critical reasoning, discernment, or rational judgment as educational aims.	Excludes general knowledge acquisition (SCH) unless reflective or critical reasoning is foregrounded.	慎思、明辨、明理、思辨、审思、反思、明察。
Table2. Sub-classification of the MOR (Morality and Virtue) Semantic Category
Code	Level		Definition (English)	Coding Criteria	Examples
MOR0	Explicit virtue terms		Broad, abstract moral concepts without a clearly specified social locus.	Lexical items centered on “德” or moral cultivation without explicit reference to self–other–nation relations.	厚德、明德、崇德、立德、修德
MOR1	Implicit virtue terms	Individual level	Moral virtues oriented toward self-cultivation and personal character formation.	Emphasis on self-discipline, integrity, sincerity, self-improvement.	至善、修身、明理、诚信、守正
MOR2		Social level	Moral norms regulating interpersonal relations and social responsibility.	Emphasis on relational ethics, social harmony, responsibility toward others.	团结、树人、责任、利物、忠恕
MOR3		National level	Moral ideals oriented toward the nation, society-at-large, or collective destiny.	Emphasis on patriotism, public service, nation-building.	爱国、报国、济世、奉献、兴邦
Table Note：For analytical clarity, the main text adopts three integrative value orientations (individual / social / national). In the Supplementary Materials, these orientations are operationalized through a finer-grained semantic coding scheme. Specifically, the categories “personal cultivation” correspond to the individual level; “ethical relations and social responsibility” correspond to the s…
3. Coding Procedures, Consistency Checks, and Reliability Assurance Semantic coding was conducted through a multi-stage procedure designed to ensure consistency, transparency, and methodological reliability. (1) Token-level and holistic semantic annotation All semantic categories identified within each school motto were annotated sequentially at the token or semantic-unit level, following the ori…
4. Inter-Coder Reliability Inter-coder reliability for the nine-category annotation was assessed using Cohen’s kappa (κ = 0.75), indicating substantial agreement. Overall percentage agreement across all coded units was 87%, supporting the reliability of the coding scheme for semantic analysis of condensed institutional texts.
