# Supplementary material
Source: Research Square preprint supplement (doi:10.21203/rs.3.rs-8638016/v1)
Supplement: Supplementary file 3 [file 42010209426d9937ffb2006d.xlsx]

## Sheet: Sheet1
No.	Motto segment	Initial coding by Researcher 1 (rationale)	Initial coding by Researcher 2 (rationale)	Discussion and negotiation process	Final coding and justification
1	Stand firm in political stance (站稳立场); master policies (掌握政策); be proficient in professional duties (熟悉业务); strictly observe discipline (严守纪律)	MOR3 / SCH / PROF / MOR1。R1 interpreted “stand firm in political stance (站稳立场)” as expressing loyalty to national and political principles (national-level morality); “master policies (掌握政策)” as knowledge-oriented; “be proficient in professional duties (熟悉业务)” as professional competence; and “strictly observe discipline (严守纪律)” as personal moral conduct.	PROF / PROF / PROF / PROF。R2 argued that, given the institutional context of a diplomatic university, all four clauses jointly articulate explicit professional norms and occupational expectations rather than abstract moral values.	Discussion focused on whether institutional mission and disciplinary orientation should take precedence in interpretation. R2 emphasized that mottos of profession-oriented institutions often function primarily as role-defining statements.	R2’s coding adopted. In a clearly profession-specific institutional context, the segment was interpreted as a coherent set of professional requirements, and contextualized interpretation was prioritized.
2	崇德(Chongde)、砺能(Lineng)、笃学(Duxue)、拓新(Tuoxin) — 砺能(Lineng)	PROF。Based on prior coding rules, R1 categorized expressions containing “ability/competence (能, neng)” as professional skills.	WILL。R2 cited the university’s official explanation, which defines "砺能 (Lineng)" as “tempering willpower and cultivating perseverance,” emphasizing volitional qualities rather than skills.	The discussion centered on the hierarchy of interpretive sources. Both coders agreed that official institutional explanations should take priority when explicitly provided.	R2’s coding adopted (WILL). According to the coding protocol, official interpretations override general lexical inference.
3	厚德博学(Houde Boxue), 经济匡时(Jingji Kuangshi) —经济匡时( Jingji Kuangshi)	MOR3。R1 interpreted the phrase as expressing responsibility toward the nation and society, emphasizing serving the country through economic engagement.	PROF。R2 considered the phrase closely aligned with the university’s disciplinary identity, highlighting professional engagement with economic affairs.	Further discussion examined the historical origin of the phrase, tracing it to Ma Yinchu’s 1934 inscription, which articulated expectations of national responsibility.	R1’s coding adopted (MOR3). Given the explicit historical intent and socio-political orientation, the phrase was classified as national-level moral commitment rather than professional specialization.
4	勤慎治学(QinShenZhixue)	DIL / DIL / SCH。R1 treated “diligent (勤, Qin)” and “prudent (慎, Shen)” as separate diligence-related qualities and “scholarship (治学, Zhixue)” as academic orientation.	SCH。R2 argued that “diligent (勤, Qin) and prudent (慎, Shen)” function as modifiers, with the semantic core residing in “scholarship (治学, Zhixue).”	Discussion focused on syntactic structure and semantic headship. Both coders agreed that modifiers should not override the core semantic unit.	R2’s coding adopted (SCH). In accordance with the coding principle prioritizing core semantic meaning over modifiers.
5	知行至善(ZhiXing Zhishan) (Unity of knowledge and action toward the highest good)	ACT。R1 interpreted the phrase as an integrated Confucian ethical structure centered on praxis, with “action (行, Xing)” as the semantic core.	SCH / ACT / MOR1。R2 initially parsed the phrase at the lexical level, identifying knowledge (知, Zhi), action (行, Xing), and moral ideal (至善, Zhishan) as distinct components.	Discussion emphasized classical philosophical context. R2 accepted that, in Confucian epistemology, knowledge serves action and “the highest good” represents the telos of practice rather than an independent value.	R1’s coding adopted (ACT). Classical semantic logic was prioritized over surface lexical segmentation.
