# Supplementary material
Source: Research Square preprint supplement (doi:10.21203/rs.3.rs-8638016/v1)
Supplement: Supplementary file 4 [file 885e73b5b34e0735c174d672.xlsx]

## Sheet: Data
No.	University	Original Motto (Chinese)	Token-Level Semantic Category Annotations	Official Interpretation (Chinese)
1	Peking University	无	/	1938年10月6日，西南联大常委会根据当时教育部的要求制定西南联大校训、校歌，成立了以冯友兰先生为主席，朱自清、罗常培、罗庸、闻一多为委员的编制校歌校训委员会。为了能够包容北大、清华、南开三校校训的精神，曾将三校校训书写在纸上摆在面前斟酌讨论，清华、南开的校训已见前文，写有“国立北京大学校训：博学、审问、慎思、明辨”的一张小纸于此第一次见到（现收藏在校档案馆），且为仅见。这八个字，在此之前、之后均未被引用过，更未被镌刻在校门、礼堂等处，也未被刊载在校刊、纪念册上。因此，数以万计的北大师生（在校或离校的）几乎没有人知道这个八个字。只是近年来由于西南联大的被人关注，四校校训并提，这八个字才为一些人所知晓。 “博学之，审问之，慎思之，明辨之，笃行之”。语出《中庸》第十九章，其主旨在讲修身、为学、治国，然而学、问、思、辨、行，“五者废其一，非学也”。（《中庸》第十九章）战国时期思想家荀况指出：…
2	Renmin University of China	实事求是	SCH	人民大学1937年诞生于抗日烽火中，前身为陕北公学，几经辗转，历经华北联合大学、北方大学、华北大学，1949年底迁往北京，即后来的中国人民大学。 陕北公学校长成仿吾曾说：“陕北公学的教学工作有三条原则：一是理论和实际相联系，二是教学内容少而精，三是教与学一致。”北方大学校长范文澜曾提出，北方大学的办学宗旨为“全心全意为人民服务”，校风即为“实事求是”。华北大学校长吴玉章曾提出华北大学的校训为“忠诚、团结、朴实、虚心”。“朴实”即“不虚伪、不轻浮、不好高骛远、不粗枝大叶，脚踏实地、实事求是的作风和态度”。 1992年6月15日，在中国人民大学校庆55周年前夕，“实事求是”被正式确定为校训，同时，镌刻着“实事求是”四个大字的汉白玉巨石，也被矗立在了学校东门内。 “实事求是”一词出于《汉书·河间献王刘德》，文中说刘德“修古好学，实事求是”。后来唐代学者颜师古将“实事求是”一词解释为“务得事务，…
3	Tsinghua University	自强不息、厚德载物	WILL; MOR0	面向未来，清华大学将秉持“自强不息、厚德载物”的校训和“行胜于言”的校风，坚持“中西融会、古今贯通、文理渗透”的办学风格和“又红又专、全面发展”的培养特色，弘扬“爱国奉献、追求卓越”传统和“人文日新”精神，以习近平新时代中国特色社会主义思想为指引，坚持把立德树人作为根本任务，把服务国家作为最高追求，把学科建设作为发展根基，把深化改革作为强大动力，把加强党的建设作为坚强保证，开拓中国特色世界一流大学高质量发展新局面，奋力迈向世界一流大学前列，努力为国家发展、人民幸福、人类文明进步作出新的更大的贡献。 清华大学的前身清华学堂成立于1911年，次年更名清华学校，是在中国被迫打开国门西学东渐背景下，用美国退还的部分庚子赔款开办的留美预备学校。当时许多有识之士在认识到应该向西方学习科学、民主的同时，不忘立足本土培养爱国建国治国之才。著名思想家、社会活动家梁启超先生十分关注清华的办学和学子的成长，他…
4	Beijing Jiaotong University	知行（北京交通大学）	SCH; ACT	北交大校训“知行”的诞生，与学校特殊的建校背景有关，也与特色鲜明的工科背景有关：北京交通大学的前身是1909年创办的铁路管理传习所，是中国第一所培养铁路管理高级人才的高等学校。从诞生的第一天起，北交大就和国家与民族的命运紧紧相连。在时局动荡的旧时代，学校历经三落三起，饱受重创；在艰苦的抗战年代，学校四次迁徙，然而学校师生始终同心同德，坚持办学，严谨治学；在新中国成立后尤其是改革开放后的这30余年中，大秦重载列车、世界屋脊青藏铁路、六次铁路大提速、高铁建设、举世瞩目的北京奥运会和上海世博会等国家“重大战场”上，无处不渗透着北交大人的智慧和血汗。 对于“知行”校训的理解，早在1921年的开学典礼上，时任校长叶恭绰主张，研求学术既要有独立境界，又贵在致用，要为人类和社会谋幸福。 校长宁滨：回首北交大这一个多世纪的风雨历练、世事沉浮，我们不难从中看到“知行”校训的一以贯之，更不难品咂出“知行”校…
5	Beijing University Of Technology	不息为体、日新为道	DIL; INNO	“不息为体，日新为道”，取自唐刘禹锡的《问大钧赋》。“不息”源自《周易·乾》“天行健，君子以自强不息”，“不息”就是不停止、不休息，永远向前，战胜困难。“体”则有物质存在的状态、本体、本性、禀性之意。“日新”源自《尚书·盘铭》“苟日新，日日新，又日新”，意思是如果能够做到一日自新，达到一个新境界，就要始终如一，永远保持，做到天天新。“道”，有本质、法则、规律、主张、宗旨之意。“不息为体，日新为道”旨在激励工大人要秉承艰苦拼搏、奋发向上的优良传统；锤炼坚忍不拔、知难而进的顽强品格；彰显开拓进取、革故鼎新的精神风貌。
6	Beihang University	德才兼备、知行合一	MOR1; SCH; SCH; ACT	“德才兼备、知行合一”的校训，是北航师生广泛认同的做人做事的行为和准则。 德才兼备，要求北航人既要具备高尚的道德品质，又要具备扎实的专业才能。德才并育，以德为先，先立德而后树人。北航坚守为党育人、为国育才的初心，围绕立德树人根本任务，培养德智体美劳全面发展的社会主义建设者和接班人。 知行合一，要求北航人既要仰望星空，追求真理、善于学习，又要脚踏实地，勇于实践、敢于创新，将理论与实践相结合，与时代同行。北航传承空天报国、敢为人先精神，服务国家重大战略需求，为实现中华民族伟大复兴的中国梦做出一流贡献。
7	Beijing Institute of Technology	德以明理、学以精工	MOR1; SCH	2010年8月26日，北京理工大学党委在广泛征求全校师生员工和校友的意见基础上，确定了学校的校训。这就是“德以明理 学以精工”。德以明理，是指道德高尚，达到以探索客观真理作为己任之境界；学以精工，是指治学严谨，实现以掌握精深学术造福人类之理想。这一校训既是建校70年来我校几代师生员工崇德尚行、学术报国的真实写照，又是新的历史时期全校师生员工共同努力的方向。
8	University of Science and Technology Beijing	求实鼎新	ACT; INNO	“求实”，意为坚持从实际出发、通过客观冷静的研究探求对客观事物的正确认知，代表了学校恪守学术规律、追求科学真理的价值取向；“鼎新”，语出《周易•杂卦》“鼎，取新也”，意为树立新的标准、风气等，体现了学校坚持与时俱进、不断开拓创新的精神特征。 “求实鼎新”合并使用，既是对学校“学风严谨、崇尚实践”优良传统的传承，也是对全体北科大人实事求是、敢为人先、勇于创新的激励和号召，更是学校深化改革、科学发展、不断铸就新辉煌的有力宣言。
9	North China University of Technology	敦品励学、才德并懋	MOR1; SCH; SCH; MOR0	敦：勉力；励：通“砺”，磨练之意。懋：通“茂”，美盛之意。 校训的具体意思是：“品行与学业同修，才学与美德并茂。”这一提法，具有深厚中国精神传统的底蕴，也强调了社会主义大学对人才培养的要求，体现了我校培养基础扎实、实践能力强、具有创新精神、综合素质高、适应社会发展需要的应用型高级专门人才的目标。
10	Beijing University of Chemical Technology	宏德博学、化育天工	MOR0; SCH; PROF	宏德博学：志向宏大，道德高尚，学问广博，学力深厚。宏：广博。陆机《吊魏武帝文》：“丕大德以宏覆，援日月而齐晖。”德：道德。《易·乾·文言》：“君子进德修业。”博学：学问广博。《论语·雍也》：“君子博学于文。” 化育天工：探索自然之奥秘，变革自然之工巧为人类服务，暗寓校名“化工”。化育：自然生成和长育万物。《管子·心术》：“化育万物谓之德。”天工：自然天成的工巧，与“人工”相对，成语有“巧夺天工”，元赵孟頫《赠放烟火者》：“人间巧艺夺天工，炼药燃灯清昼同。”明宋应星《天工开物》一书是世界科技名著，表现了我国劳动人民在科技工艺方面的智慧和创造。
11	Beijing Technology and Business University	求真、立德、勤奋、创新	SCH; MOR0; DIL; INNO	北京工商大学校训“求真 立德 勤奋 创新”凝聚着北工商精神，是为传承学校优良传统，树立优良校风，培养良好学风提出的北工商人共同遵守的思想规范和行为准则。 “求真”，出自陶行知名言：“千教万教教人求真，千学万学学做真人。”求真，就是追求真理，实事求是；探索规律，崇尚科学。为师者，则求治学严谨，慎思至精，不图虚名，不媚流俗；为学者，则务刨根问底，博学笃行，不必不如师，不为贤者讳。 “立德”，出自《左传 · 襄公二十四年》：“太上有立德，其次有立功，其次有立言。虽久不废，此之谓不朽。”立德，就是要培养符合时代精神的思想品质，追求高尚的道德情操和行为规范。为师者，则言传身教，为人师表，甘为人梯；为学者，则志存高远，立学为民，治学报国。 “勤奋”，出自韩愈《进学解》“业精于勤，荒于嬉；行成于思，毁于随”和平步青《霞外攟屑 · 掌故 · 林西厓方伯》“似此勤奋出力之员，岂可拘其家世，不加奖励”。勤奋…
12	Beijing Institute Of Fashion Technology	与美同行	PROF	庄子云：天地有大美而不言，四时有明法而不议，万物有成理而不说。北京服装学院坚持以艺为主、服装引领、艺工融合，为中国纺织服装、时尚、文化创意人才培养和产业发展书写了浓墨重彩的一笔。 “与美同行”体现了北京服装学院独特的办学优势和鲜明的办学特色，生动诠释了学校在传承创新中华优秀传统文化，助益中华民族文化复兴、服务人民美好生活的使命与担当。寓意北服师生在与时代同行中，始终追寻美、创造美、弘扬美。
13	Beijing University of Posts and Telecommunications	厚德博学、敬业乐群	MOR0; SCH; PROF; MOR2	“厚德”语出《易经·坤卦·彖》：“坤厚载物，德合无疆”；“博学”语出《礼记·儒行》：“儒有博学而不穷，笃行而不倦”；“敬业乐群”语出《礼记·学记》：“一年视离经辨志；三年视敬业乐群；五年视博习亲师；七年视论学取友，谓之小成。” 北邮人以高尚的德行包容万物，通过刻苦的学习和实践获得广博的知识；爱岗敬业，忠于职守，团结协作，奋发有为；以大德大爱的情怀肩负起家国重任和时代使命，以强烈的事业心和责任感服务社会、造福人民。
14	Beijing Institute of Graphic Communication	守正出新、笃志敏行	MOR1; INNO; WILL; ACT	“守正”，意为恪守正道，胸怀正气，行事正当。出自《汉书·刘向传》“君子独处守正，不桡众枉”；“出新”，意为旧的事物得到新的发展，弃旧图新。《礼记•大学》引用商汤王刻在器皿上警戒自己的箴言“苟日新，日日新，又日新”，倡导不断革新、积极进取。 “笃志”，意为专心一志，立志不变，坚守自己的志向。出自《论语•子张》“博学而笃志，切问而近思，仁在其中矣”；“敏行”，意为勉力修身；办事敏捷。出自《论语·里仁》“君子欲讷於言而敏於行”。 “守正”是一种价值追求，既是对“德”的要求，也是对“行”的约束。倡导师生在做人、做事、做学问上要恪守品德之道、学问之道、处世之道、行事之道。“出新”是一种责任担当，也是一种能力和要求。要求师生要有创新精神、创新能力，并不断审时度势、探索新知、弃旧图新。 “笃志”是一种精神动力，人无志而不立，事无恒不成。要求师生坚定理想信念、明确目标追求，并笃定不移、坚韧不拔、持之以恒…
15	Beijing University of Civil Engineering and Architecture	实事求是、精益求精	ACT; SCH; DIL	“实事求是”指严谨治学、务求真谛的一种求实求真的治学态度（出自《汉书·河间献王刘德传》，是对读书、做学问的精神、方式的一种表述。“精益求精”指已经很好了，还要更好，力求尽善尽美（出自《大学》）。“实事求是 精益求精”既是一代代北建大人崇尚科学、遵循规律、追求真理、勇于创新、锻造匠心、追求至善的真实写照，又体现了引领北建大未来发展的价值取向和精神追求。
16	Beijing Institute of Petrochemical Technology	宁静致远、务本维新	WILL; ACT; INNO	宁静致远：意为要有所作为，须静心、聚力，专心致志。语出诸葛亮《诫子书》：“非淡泊无以明志，非宁静无以致远。” 务本：意为坚守做人之根本。取自《论语·学而》：“君子务本，本立而道生”。 维新：即创新。出自《诗经·大雅》：“周虽旧邦，其命维新。” “宁静致远、务本维新”作为校训，意为要注重人格培养和品行修为，戒骄戒躁、严谨求实，凝心聚力、专志于学，开拓创新、自强不息，以达成人生理想之远大目标。
17	Beijing Electronic Science and Technology Institute	忠诚、笃学、严谨、守纪	MOR3; SCH; DIL; MOR1	忠诚：《荀子·尧问》：“忠诚盛於内，贲於外，形於四海”。忠诚代表着诚信、守信和服从，对党对祖国无限忠诚。 笃学：语出《论语.泰伯》：“笃信好学，守死善道”。学校师生要专心好学。
18	China Agricultural University	解民生之多艰、育天下之英才	MOR3; PROF	"长太息以掩涕兮，哀民生之多艰"是屈原《离骚》中的名句，其中所寓含了深沉的忧患意识和强烈的社会责任感，几千年来一直感动并激励着中国知识分子为国为民殚精竭智。"民生之多艰"是中国的农情，也是中国的国情，中国农大以农立校，国富民殷、强农为本，是中国农大百年不变的追求。数代农大人情系乡土，忧患苍生，为实现中国人千百年来的温饱和富庶之梦不遗余力。以"解"代"哀"，以此为己任的大气取代了原句中的悲戚之气，恰切地表现了中国农业大学有别于其他高校的独特性。 以"育天下之英才"接"解民生之多艰"充分体现了中国农大作为农业高校首府的教育特性，磅礴有力、气势不凡，上合我校百年深厚历史，下启建设世界一流农业大学的世纪雄心，以育"天下"英才为乐，也体现了中国农大开阔的胸襟和远大理想。
19	Beijing University Of Agriculture	厚德笃行,博学尚农	MOR0; ACT; SCH; PROF	厚德笃行，意在强调学校“育人为本、德育为先”的教育理念，期望师生塑造高尚的道德品格，以德立身，注重实践，用以倡导尚德重行的育人精神。博学尚农，旨在突出学校“以农为本、博采众长”的教育思想，要求师生重视农业、关注“三农”，掌握广博知识，积淀深厚学问，用以培养宏达广识的爱农求知情怀。二者密切相联、相辅相成，充分体现了“德才兼备”与“知行合一”的全面要求和完整统一，与学校“以农为本、唯实求新”的办学理念和复合型应用型都市型现代农林人才的培养目标一脉相承。
20	Beijing Forestry University	知山知水，树木树人	PROF; MOR1	一种植根于大自然的办学情怀，强调了学校对自然环境的尊重和对人才培养的重视。
21	Peking Union Medical College	尊科学济人道	SCH; PROF	协和医学院的校训尊科学济人道，点出了学校的立意与宗旨，即尊重科学、依靠科学、遵循科学、发展科学，以科学作为实现人道目的的基础与路径。强调科学，是协和医学院一个重要特点。
22	Capital Medical University	扶伤济世、敬德修业	PROF; MOR3; MOR0; PROF	“扶伤”出自毛泽东的题词：“救死扶伤，实行革命的人道主义”。“济世”出自医学典故“悬壶济世”。“敬德”、“修业”出自《中庸》“君子尊德性而道问学”；《周易》“君子进德修业”。 扶伤济世是医务工作者的天职，敬德修业是实现扶伤济世的基础。以“扶伤济世，敬德修业”为校训，体现了学校在学科发展和人才培养中的要求，追求“德、业”境界，履行“济世”义务。 校训体现了首医大办学的理念。
23	Beijing University of Chinese Medicine	勤求博采、厚德济生	DIL; MOR0; PROF	“勤求博采”：语出医圣张仲景《伤寒杂病论·原序》：“勤求古训，博采众方。”现用以表示我校师生要做到勤奋研求，广博采搜，汇通中西，学贯古今。此4字集中讲治学态度和治学方法。 “厚德济生”：厚德，语出《易·坤卦》：“地势坤，君子以厚德载物。”厚德济生四字合而表示师生要宽厚仁爱，品德高尚，以仁术普济苍生，全面服务社会。此4字主要讲品德修养、做人、做事。 以上八字还寓含继承与发展相结合、中医与西医相结合、传统与现代相结合的理念。
24	Beijing Normal University	学为人师、行为世范	SCH; PROF; MOR1	经过百余年的发展，学校秉承“爱国进步、诚信质朴、求真创新、为人师表”的优良传统和“学为人师、行为世范”的校训精神，形成了“治学修身，兼济天下”的育人理念。 启功先生曾专门对北师大校训作出解释：学，是指每位师、生应具有的学问、知识以及技能，要能够成为后学的师表；行，是指每位师、生应具有的品行，思想、行动、待人、对己，要光明正大，能够成为社会模范。北师大校训延续了百余年来北师大人的精神传统，简约而义达，紧扣“师范”二字，包含了学与行、为学与为人、为人与为师之间的关系，生动平易地诠释了北师大的办学理念，深刻隽永地明示了学校师生治学服务的根本遵循。
25	Capital Normal University	为学为师、求实求新	SCH; PROF; ACT; INNO	首都师大校训，是在继承的基础上，经广泛征集、多方论证，于1993年确定以“为学为师 求实求新”为校训（闫殿和草拟）。校训既突出师范教育，又反映时代精神。 “为学为师”，即要求学生勤奋学习、教师勤勉治学；要求学生要独善其身、兼善天下，教师要为人师表、教书育人。“为学为师”警策全体师生勿忘天职，也体现了“教与学”、“师与生”的辩证关系。 “求实求新”，即要求全校师生贯彻实事求是的思想路线，治学、育人都要求真务实；要求教师要努力提高创新意识、创新能力，重视培养学生的创新精神、实践能力。“求实求新”提出我校师生行为的规范，表明首都师大崇尚真才实学、勇于开拓。
26	Capital University of Physical Education And Sports	以挑战者精神拼搏创新	WILL; INNO	以挑战者精神拼搏创新。时代特色鲜明，以平白之语阐明了学校精神，激励体院学子拼搏向上，敢于争先。
27	Beijing Foreign Studies University	兼容并蓄、博学笃行	INCL; SCH; ACT	“兼容并蓄”，源自蔡元培任北大校长时提出的“思想自由，兼容并包”，“兼容并蓄”意味着一种世界眼光和开放性胸怀，既是世界不同文化文明的兼容，又是以外语为主的其他学科的兼容，同时孕育着创新。 “博学笃行”出自《礼记·中庸》，讲的是为学和实践，“博学”意广泛的猎取，“笃行”是为学的最后阶段，就要努力践履所学，做到“知行合一”。 所谓“兼容并蓄”，简单说就是要学习不同内容、不同性质的东西来充实自己。《四书》十九章有云：“博学之，审问之，慎思之，明辨之，笃行之。”说的是为学的几个层次，或者说是几个递进的阶段。博学之意谓为学首先要广泛的猎取，培养充沛而旺盛的好奇心。好奇心丧失了，为学的欲望随之而消亡，博学遂为不可能之事。“博”还意味着博大和宽容。唯有博大和宽容，才能兼容并包，使为学具有世界眼光和开放胸襟，真正做到“海纳百川、有容乃大”，进而“泛爱众，而亲仁”。因此博学乃能成为为学的第一阶段。越过这一…
28	Beijing International Studies University	明德、勤学、求是、竞先	MOR0; DIL; SCH; WILL	明德：出自《大学》“大学之道，在明明德，在亲民，在止于至善”。现代意义上可以理解为培养和彰显高尚的修养和道德。 勤奋：在知识上勤而为之，发愤图强。 求是：追求真理，实事求是。 竟先：具有强烈的竞争意识，敢为人先，勇于探索。
29	Beijing Language and Culture University	德行言语,敦睦天下	MOR0; PROF; MOR3	2007年9月，96岁高龄的季羡林先生为北京语言大学提笔写下 “德行言语，敦睦天下”八个大字，成为学校的校训。 以言传德，促进文化交流，坚持不懈身体力行地促进中外文化的交流和沟通，致力于世界和平。
30	Communication University of China	立德、敬业、博学、竞先	MOR0; PROF; SCH; WILL	“立德、敬业、博学、竞先”是中国传媒大学于20世纪90年代初确立的，其含义是“立德”就是坚持德以所谓，培养学生树立良好的社会功德和职业道德。“敬业”就是要敬重事业，热爱专业，专心学业，具有强烈的事业心和社会责任感。“博学”就是要掌握广博的科学文化知识，博文广识，博学多才，基础厚实。“竞先”就是要具有时代精神，竞争意识和竞争能力，开拓进取，敢为人先。
31	Central University of Finance and Economics	忠诚、团结、求实、创新	MOR3; MOR2; ACT; INNO	长期以来，学校秉持“忠诚、团结、求实、创新”的校训，传承“求真求是追求卓越”的办学理念，坚守“立德树人财经报国”的使命担当，建立起以经济学、管理学和法学学科为主体，文学、理学、工学、教育学、艺术学等多学科协调发展的学科体系，形成了鲜明的办学特色。 中央财经大学与新中国同岁，中财校训与主流思想一致，与国家发展一致。 “忠诚”包括四个方面：就是我们要对党忠诚、对人民忠诚、对国家忠诚、对共产主义事业忠诚。其中，对党忠诚是核心，对共产主义事业忠诚是灵魂。 团结——全心全意为人民服务，团结一切能团结的党派和人民，团结最广大的人民一直是中国共产党的宗旨。 求实——中国共产党十分重视“实事求是”，中国共产党坚持“一切工作要从实际出发”思想路线，这是无数次实践和历史的证明，这是我们取得新民主主义革命和社会主义建设快速发展的必胜法宝。 创新——中国共产党人的创新很多，所以才能有中国共产党领导的多党合作制的…
32	University of International Business and Economics	博学，诚信，求索，笃行	SCH; MOR1; WILL; ACT	1994年6月，对外经济贸易大学颁布了经学校师生员工广泛讨论后通过的新校训——博学，诚信，求索，笃行。 “博学、诚信、求索、笃行”八字校训从学业、品德、精神、实践四个方面提出了明确要求。其释义如下： 博学： 学识广博，即宽厚的基础理论、扎实的基础知识和娴熟的基本技能；文理兼容，百科兼纳，专业领域游刃有余，高质量、复合型，德智体全面发展。 诚信：诚实不欺，讲求信用。忠诚于党，忠诚于祖国，忠诚于人民的事业；有远大理想、崇高信念；有社会主义的高尚思想品格和修养。 求索：不断探索，锐意创新，追求新知，奋发向上，探索真理，开拓事业。 笃行：实事求是，不尚空谈，努力实践，坚忍不拔，执着追求，乐于奉献。 “博学、诚信、求索、笃行”八字校训，不仅是全校学生的行为准则和奋斗目标，也是全校教职员工的行为准则和奋斗目标。全校教职员工应言传身教，全校教职工应自觉遵守，努力实践。
33	Beijing Wuzi University	厚德博学、笃行日新	MOR0; SCH; ACT; INNO	“厚德博学”强调了道德修养和知识广博的重要性，而“笃行日新”则体现了实践精神和不断追求创新的态度。这一校训不仅指导着学校的教学和科研活动，也是学校培养人才、服务社会的重要准则。通过这一校训，北京物资学院致力于培养具有高尚道德、广博知识和实践能力的高素质人才，同时推动学术研究和社会服务的创新与发展。
34	Capital University of Economics and Business	崇德尚能、经世济民	MOR0; PROF; MOR3; MOR3	首都经济贸易大学的校训“崇德尚能 经世济民”是学校根据办学目标和办学特色，为树立优良校风、培养良好学风而制定并要求师生共同遵守的基本思想规范和行为准则，是学校师生员工的座右铭。 “崇德”，是指首经贸崇尚和发扬完美的道德品性，出自《论语·颜渊第十二》，“主忠信，徙义，崇德也。”它体现了首经贸德育为首的办学原则，寓意广大师生注重思想道德修养，在遵守基本行为准则的基础上，以弘扬中华民族的优秀传统文化、建设现代文明为己任，追求更高的思想道德目标。 “尚能”，是指首经贸办学特色，即培养富有创新精神和实践能力的应用型、复合型高级专门人才的重要体现，意为重视能力培养、重视素质的全面提升，不断提升知识应用能力、专业技术能力，加强继续学习能力、创新能力、创业能力等多种能力，不断强化师生实践创新能力，培育理论与实践紧密结合的高素质人才，全力建设首都经济管理人才培养的主要基地，服务首都经济发展。 “经世济民”…
35	China Fire And Rescue Institute	忠勇兼备、知行合一	MOR3; MOR1; ACT	校训是中国消防救援学院文化建设的核心内容，学院教风、学风、校风的集中表现，承载着学院办学理念、治校精神和优良传统，内聚合力、外树形象，包含着广大师生的共同理想、价值追求和精神风貌。 忠勇兼备：对党忠诚，勇敢坚毅。彰显学院始终坚持党的绝对领导、坚定理想信念的政治本色，坚决听从党的号令，永葆英勇顽强、赴汤蹈火、竭诚为民的责任担当，永远做党和人民的忠诚卫士。 知行合一：博学求知，笃行创新。彰显学院既要锤炼忠诚品格、涵养高尚师德、厚实业务本领、严明纪律作风，也要勇于实践、勤于应用、敢于创新，为国家综合性消防救援队伍培养高素质人才提供智力支撑。
36	China Foreign Affairs University	站稳立场，掌握政策，熟悉业务，严守纪律	PROF; PROF; PROF; PROF	外交学院认真贯彻党的教育方针，以周恩来 总理向外交人员提出的“站稳立场、掌握政策、熟悉业务、严守纪律”十六字方针作为校训，以 江泽民同志为我院所作“立足祖国、放眼世界、面向未来、培育英才”的题词精神和钱其琛同志 对我院提出的“面向世界，面向未来、面向社 会、面向实际”为办学方针，把培养高层次外交 外事人才作为办学目标。 外交学院的校训，是周恩来总理给中国外交人员提出的基本素质的要求。每一个进入外交学院的学子，就要按这16个字要求，能够在国家重要的、敏感的各种岗位上经受住考验，以国家利益为重，熟练掌握我国对外政策，维护国家尊严，为国家出力。
37	People's Public Security University of China	忠诚、求实、勤奋、创新	MOR3; ACT; DIL; INNO	“忠诚、严谨、求实、创新”。这八个字不仅是对学子们的期望，更是对他们肩负的使命的深刻诠释。在这里，每一位学子都将以国家的荣誉为己任，以人民的安宁为追求，铸就铁一般的意志与担当。
38	University of International Relations	忠诚、勤奋、求实、创新	MOR3; DIL; ACT; INNO	国际关系学院作为一所曾经以培养外事人才为主的重点高校，忠诚作为校训的最重要核心，体现的是对中国共产党的忠诚、对中国的忠诚和对事业的忠诚。也是对学子最重要的道德和行为操守训诫。 其前身为“中央军委干部学校”，曾为新中国第一批“将军大使”开办培训班，在国内外享有较高声誉。建校以来，学院始终秉承“忠诚、勤奋、求实、创新”的校训精神，坚守“为党育人、为国育才”的初心使命，坚持社会主义办学方向，以立德树人为根本，主动服务国家重大发展战略，努力“建一流高校，育一流人才”。
39	Beijing Sport University	追求卓越	WILL	它体现的不仅是奋勇争先的精神，更是一种超越自我的境界。 卓越不是一个标准，而是一种境界。它不是优秀，它是优秀中的最优；卓越是一种追求，它在于将自身的优势、能力，以及所能使用的资源，发挥到极致的一种状态；是“更快、更高、更强”的奥林匹克精神的体现。
40	Central Conservatory of Music	勤奋、求实、团结、进取	DIL; ACT; MOR2; WILL	“书山有路勤为径，学海无涯苦作舟。”胡显章说，这句激励历代学子的治学名言，核心也是“勤奋”。 “求实”、“团结”是上世纪50年代初建校，当时全国号召向解放军学习，与部队优良作风有关。
41	China Conservatory of Music	仁爱、诚信、博学、精艺	MOR1; MOR1; SCH; PROF	建校伊始，中国音乐学院秉承延安鲁艺精神，弘扬“仁爱、诚信、博学、精艺”校训，立足北京、服务全国、走向世界，为中国音乐的传承、发展和弘扬作出了卓越贡献。从恭王府邸到健翔桥畔，丝竹音韵，滋兰树蕙。学校坚持扎根中国大地办大学，坚持为党育人、为国育才，坚持“以人民为中心”的创作和人才培养导向，坚持“承国学、扬国韵、育国器、强国音”办学理念，培养了一大批德艺双馨的音乐艺术家，创作了一大批无愧于时代的经典音乐作品，被誉为“中国音乐家的摇篮”。 面向未来，学校将继承中国民族音乐艺术传统，汲取世界音乐文化的优秀成果，秉承“仁爱、诚信、博学、精艺”的校训，以建设“国内一流，国际著名”的高等音乐学府为目标，以培养高水平民族音乐人才及弘扬民族音乐文化为己任，励精图治、开拓进取、不断创新，努力把中国音乐学院建设成具有鲜明中华民族特色和时代精神的“中国民族音乐高层次人才的培养基地，中国民族音乐科研和信息的中心，中…
42	Central Academy of Fine Arts	尽精微、致广大	PROF	中央美术学院建院初期，徐悲鸿先生从《中庸》“故君子尊德性而道问学，致广大而尽精微，极高明而道中庸，温故而知新，敦厚以崇礼”中选取“尽精微 致广大”，将其用于指导素描教学与绘画造型。徐悲鸿先生“尽精微 致广大”的教学理念，集中体现了美院多年来的精神品质。
43	The Central Academy of Drama	求真、创造、至美	SCH; INNO; PROF	把中央戏剧学院建设成“以戏剧艺术教育为主体、特色鲜明、国际一流的艺术院校”。坚持现实主义美学原则，继承中华民族传统美学，博采众长；厚基础、重实践，“求真、创造、至美”，为国家乃至世界培养戏剧影视艺术精英人才。 求真，就是追求真实，追求真理，探寻戏剧艺术的真谛； 创造，就是不断地创新和突破，以超越前人和自我； 至美，就是实现中国乃至世界最好的戏剧教育，培养戏剧影视精英人才。
44	National Academy of Chinese Theatre Arts	德艺双馨，继往开来	MOR0; PROF; INNO	中国戏曲学院坚持以德树人，秉持“德艺双馨，继往开来”校训。校训昭示了对培养人才的期许，要求学生重德行重艺业，德为艺先，努力成为具有炽热的爱党爱国爱民的家国情怀，深厚的传统文化底蕴，扎实的民族艺术功底；肯立足、献身民族艺术，善借鉴、融会一切优秀文化艺术成果，创新创造，继前贤之规矩开今人之生面的戏曲英才。校训彰显了对学院使命的担当，坚忍不拔，孜孜以求，始终以继承弘扬中华优秀传统文化为己任；努力把学院建设成民族特色鲜明、国内水准一流、国际影响广泛的高水平特色戏曲艺术大学。
45	Beijing Film Academy	尊师重道,薪火相传	MOR2; SCH; INNO	“尊师重道，薪火相传”是季羡林先生在2001年为北京电影学院的题词。这两句校训前后先连，相辅相成，构成了学校校训的完整表达。“尊师”：表达了对中国电影100多年、新中国电影60多年历史中对中国电影教育做出贡献的师长和对学校办学传统的尊重和师承。“重道”：表达了在电影教育中要坚持为国为民、弘扬真理正义，献身艺术和电影的精神。对于我校而言，强调了我校具有电影专业化教育的学术传统，具有追求精益求精的高品质艺术创作的传统。“薪火相传”：概括了北京电影学院作为国内唯一的专门电影艺术教育高校，在几十年的风雨历程中为我国电影教育事业所做出的努力和所形成的将电影文化的精神代代相承的传统。
46	Beijing Dance Academy	遵道崇德，天地人和；文舞相融，德艺双馨	MOR1; MOR0; INCL; PROF; MOR0; PROF	2010年，在坚持文化引领的方针下，经过全院反复讨论，党委从文化内涵上将校训丰富为“遵道崇德，天地人和；文舞相融，德艺双馨”。“遵道崇德，天地人和”高度概括了中国传统文化的精髓，提出做人做事的深刻道理；“文舞相融，德艺双馨”集中凝练了艺精德劭、品德与艺术相并重的要求。 在北京舞蹈学院校园门口刻有“舞蹈家摇篮”的巨石背面，亦有象征文化支撑的“天地人和”四个大字，并附有这样一段文字：“天行健，君子以自强不息；地势坤，君子以厚德载物；人有度，君子以知时守节；和为贵，君子以成人之美。”前两句话的解释是《易经》中的乾坤两卦，后两句话是我们从传统文化精髓中，结合舞蹈艺术教育实际，选择提炼出来的。这些中国传统文化的精髓，正是党委所倡导的北京舞蹈学院的文化追求，它是我们一直所找寻的文化根基所在，已成为每一位舞院人追求和尊崇的方向。
47	Minzu University of China	美美与共，知行合一	INCL; ACT	美美与共，知行合一”，是中央民族大学的校训，是民大学风的核心内涵。 “美美与共”，是费孝通先生对民族文化自觉的表述。他说：“如果人们真的做到‘美美与共’，也就是在欣赏本民族文明的同时，也能欣赏、尊重其他民族的文化，那么，地球上不同文化、不同民族、不同国家之间就达到了一种和谐，就会出现持久而稳定的‘和而不同’”。 “知行合一”一词则源于中国古代哲学的一个认识论命题，现今引申为一种对认识与实践关系的表达，意在强调知与行的辩证统一。 有专家指出：“美美与共，知行合一”的核心思想为“人与人和，知与行合”；校训较完整体现了我校的办学宗旨、定位和特色，突出了我校的大学文化特质和治学理念。
48	China University of Political Science and Law	厚德、明法、格物、致公	MOR0; PROF; SCH; MOR3	“厚德”强调为人， “明法”强调为事的规矩、法度，“格物”强调为学，而“致公”强调做人、为事。 “厚德”源自《易经》的“天行健，君子以自强不息。地势坤，君子以厚德载物”，意在培养师生优良的公民道德、职业道德、政治道德，增厚美德，容载万物。这是人文精神的凸显。 “明法”取自《管子·明法》，意求师生学法、懂法、守法、护法、用法，以法治天下、建设法治中国为己任。这是法治精神的体现。 “格物”出自《礼记·大学》的“致知在格物”“格物而后知至”，意促师生实事求是，求真务实，有科学的思维和理性。这是科学精神的写照。 “致公”取法于《礼记·礼运》的“大道之行也，天下为公”。此处“致”从“至”，“致公”也为“至公”，出自《管子·形势解》的“风雨至公而无私，所行无常乡”，意为师生要坚持和弘扬公平正义的价值观，有仁爱亲民，献身公益，服务公众的社会责任感，是公共精神的张扬。 学校最核心的文化和精神是校训精神，…
49	North China Electric Power University	团结、勤奋、求实、创新	MOR2; DIL; ACT; INNO	一、团结 团结就是力量。领导班子的团结、教工之间的团结、学生间的团结、领导与群众间的团结、师生间的团结，是办好学校的前提。 二、勤奋 勤奋办学、勤奋工作。学生要勤奋学习，教职员工要勤奋工作；只有勤奋才能出成绩、出成果，才能铸就辉煌的业绩。 三、求实 实事求是，一切从实际出发。即从学校的实际出发，从本单位的实际出发，从个人的实际出发，遵循客观规律，脚踏实地地干实事。 四、创新 创新是事业的灵魂。创新就要创一流的科研成果，培养一流的创新人才，培育一流的先进文化。学校要成为创新的基地，成为国家创新体系的重要组成部分。
50	China Women's University	崇德、至爱、博学、尚美	MOR0; MOR2; SCH; WILL	崇德，需要立德修身，成为品格高尚、具有社会责任感的大学生。至爱，大爱无疆，成为有良知、有公益意识的大学生。博学，勤奋学习，成为博文广志、富有才干的大学生。将审问、慎思、明辨结合起来，以提升智慧和能力，最终落脚到笃行，化入行动、融入生活、投入社会、贡献国家。尚美，崇尚美好，成为青春向上、知性高雅的大学生。
51	Beijing Information Science and Technology University	勤以为学、信以立身	SCH; MOR2	这一校训集中体现了高校德育“会做人与善做事”的价值指向，彰显出“勤奋治学，诚信做人”的德育愿景。要求学生要高度重视“做人”与“做事”教育，既要积极养成教育和生活教育，又要倡导主体性德育，不断提升大学生的道德践行力，培养高素质应用型人才。
52	China University of Mining & Technology, Beijing	明德至善，好学力行	MOR0; MOR1; SCH; ACT	“明德至善”，出自《大学》，意为彰显高尚的品德修养，追求完美的人生境界。“好学力行”，出自《中庸》，1934年，学校名誉校董蔡元培先生以此题词勉励师生，意为笃志爱学、奋力实践。 校训表达了矿大人以德为本、崇德向善的价值追求；体现了学校落实“立德树人”根本任务，秉承“育人为本，德育为先”的办学理念，致力于培养能源工业精英人才的育人目标；诠释了矿大人勤奋严谨的治学态度和学行相辅的治学传承。既是对治学之道的阐发明释，也是对中华民族精神和学校厚重历史文化的继承发扬。
53	China University of Petroleum, Beijing	厚积薄发、开物成务	DIL; ACT	“厚积薄发”出自苏轼的《稼说送张琥》“博观而约取，厚积而薄发”。“开物成务”则出自《周易·系辞上》——“夫《易》开物成务，冒天下之道，如斯而已者也。” 学校以及一代代石大人坚守家国情怀，发扬“实事求是，艰苦奋斗”的精神，不断积蓄前进力量、积累智慧学识，涵育崇高的理想信念和道德情操，以实学为务，开发能源，造福于民，成就功业，为成就国家现代化建设伟业和人类社会和谐进步作出贡献！
54	China University of Geosciences Beijing或China University of Geosciences	艰苦朴素、求真务实	DIL; SCH; ACT	校训“艰苦朴素 求真务实”，是校友温家宝于1994年10月19日回母校后为学校的题词。“艰苦”，就是要发扬艰苦奋斗的精神，不畏艰难困苦，勇攀科学和人生的高峰，奋力达到光辉的顶点。“朴素”，就是要保持朴素无华的本色，言行诚实、生活简朴，不虚假，不奢侈，不浮夸，永葆真情、永做真人。”求真”，就是要坚定追求真理的信念，不迷信权威、不因循守旧，努力探索和实践，揭示自然的奥秘、社会的法则和人生的真谛。“务实”，就是要发扬务实前行的作风，不图虚名、不鹜虚声，惟以求真的态度，做踏实的功夫，永远向前看，向前做，向前行。 学校坚持为国育才的初心不改，特色、高水平发展的定位不改，人与自然和谐发展的追求不改，艰苦朴素、求真务实的本色不改，坚持弘扬“严在地大”的校风学风，着力培养能够担当民族复兴大任、“品德高尚、基础厚实、专业精深、知行合一”的高素质人才，着力为解决区域、行业乃至人类面临的资源环境问题提供高水平…
55	Beijing Union University	学以致用	SCH; ACT	“学以致用”是“发展应用型教育，培养应用型人才，建设应用型大学"办学宗旨的核心内容，是“面向大众，服务首都；应用为本，争创一流"办学定位的精练表达。“学以致用"的“学"，既是知识技能之学，又是理想道德之学；“学以致用"的“用''，既是知识技能之用，又是理想道德之用。以学用之道，达又红又专，做“四有"新人。 “学以致用"的“学"，是有用之学，能用之学；“学以致用"的“用"，是学了能用，学了会用。在这里，用规定学，学了为用；学用一体，不可分离。“学以致用”的“学”，是勤奋好学之学，是讲究方法之学；“学以致用”的“用”，是敢于运用之用，是善于运用之用。在这里，勤学善用，学用相长；学无止境，用无止境。“学以致用”，其意既在训导学生，也在勉励教师。教师之学、之教都在致用。要有学以致用之学生，须先有学以致用之教师；善于教人学以致用者，必先自己善于学以致用也。 经中共北京联合大学委员会三届五次全体委员…
56	China Youth University of Political Studies	实事求是、朝气蓬勃	ACT; SCH; WILL	校长秦宜智指出，中青院校训是“实事求是、朝气蓬勃”，“实事求是”是党的思想路线和优良传统，“朝气蓬勃”是青年特质的集中体现，两者融合，应当成为同学们一生求学求知、做人做事的精神底蕴，成为同学们不忘初心、坚定前行、人生出彩的精神力量。 实事求是，就是要信仰坚定，追求实学，躬身实践，一步一个脚印地去拥抱理想、成就人生。希望同学们笃实做人，坚定理想信念，修养厚重笃实的人格，真实而不虚伪、自信而不自满、阳光而不灰暗，在校园中收获满满的师生情、同学谊。希望同学们扎实为学，珍惜宝贵的校园时光，强化自觉爱学习，养成习惯勤学习，掌握方法会学习，打牢学问功底，为青春注入求知的无穷乐趣，为人生插上知识的有力翅膀。希望同学们躬身实践，既要读好课堂上的有字之书，更要读好社会这本无字之书，积极参与社会实践，体察国情、增长见识，在实践中经风雨、长才干，做知行合一的实干家。 朝气蓬勃，就是要志存高远，积极进取，体魄强…
57	Shougang Institute of Technology	自强、求实、团结、创新	WILL; ACT; MOR2; INNO	展现了学校全体师生团结拼搏、勇于探索，不息自强、敢为人先、创新致远的精神风貌。（校风“敦品励学、重能精技”：砥砺品德,奋发学习,德技并重,全面发展,立志成才;注重技能培养,勇于实践,德技并懋,知行合一,蔚然成风。）
58	China University of Labor Relations	刚健创新、和而不同	WILL; INNO; INCL	刚健创新，源于《周易》。“君子积刚以固其德，而不懈于动”。大学教育的根本，是致人于刚健善美，出人于精神荒寒。在知识求索的进程中，培育宏扬君子的品德，刚健笃实，自强不息，革故鼎新，进取有为，养成以社稷民生为己任的浩然正气。 和而不同，语出《论语》。和是“一”，和而不同是“一”中包含多元，既不失准则又包容并存。劳动关系三方各有自己的利益诉求，应倡导坚持原则而又善于协调，正视差异而能和睦相处，尊重多元而求公平正义。和谐而又不千篇一律，不同而又不彼此冲突，和谐以共生共长，不同以相辅相成。
59	Beijing Police College	坚定、勤奋、求实、严明	WILL; DIL; ACT	秉承“坚定、勤奋、求实、严明”的校训，着力培养政治合格、作风过硬、基础扎实、体魄强健、专业知识宽、警察技能强、德智体全面发展的公安应用型专门人才。 学校秉承“坚定、勤奋、求实、严明”的校训,以政治建校为首要任务,坚持首善标准,强化首都意识,人才培养面向实战,科学研究讲求实用,社会服务注重实效,突出“三首三实”的办学特色。
60	University of Chinese Academy of Sciences	博学笃志、格物明德	SCH; WILL; SCH; MOR0	“博学”源自《中庸》中“博学之，审问之，慎思之，明辨之，笃行之。”的首句，是希望我们的学生通过刻苦学习和实践，获得广博的知识，不仅懂得自己攻读的专业，也能跨越学科的边界涉足其它的领域；不仅有自然科学、工程技术的训练，还要有一定的社会、历史、人文、艺术的修养；不仅要有较全面又相对合理的知识结构，还要有远大的抱负和广博的胸怀，面向社会，看待人生，走向未来，在生命途中永无止息地学习和充实自己。 “笃志”源自《荀子·修身》中“笃志而体，君子也。”意思是具有坚定意志并能付诸实践的人，才是君子。其实路院长重视的“笃志”是有新意的，他曾讲过：“在发展我国科学技术，振兴中华的伟大实践中……要努力向钱学森、邓稼先、李四光、钱三强、吴文俊、彭加木、蒋祝英和蒋新松那样的杰出科学家学习。因为在他们身上，体现了对共产主义崇高理想的坚定信仰和对科学事业执著追求的完美统一。他们是中国知识分子的优秀代表，是全中国科技工…
61	University of Chinese Academy of Social Sciences	笃学、慎思、明辨、尚行	SCH; REAS; REAS; ACT	中国社会科学院研究生院文化精神校训在研究生院建院30周年之际，时任全国政协副主席、中国社会科学院院长陈奎元为研究生院题写了八个大字——“笃学、慎思、明辨、尚行” 经征求研究生院教授委员会全体委员、全院教职学员工意见，研究生院院长办公会议研究决定，将这八个字确立为中国社会科学院研究生院校训 “笃学、慎思、明辨、尚行”，分别出自《论语·泰伯》《中庸第二十章》《皇极经世书·观物篇》 古文原意是总结儒家学者研习经典的学习方法及过程，旨在为儒者修身、齐家、治国、平天下的社会理想而治学与做人 笃学：笃，笃实，深厚之意 笃学，即以认真诚恳的态度学习知识 慎思：强调要对所学加以慎重思考，“学而不思则罔”，只重学习而不注重思考，就有可能受到蒙蔽而陷于迷茫 “明辨”：意为有明智的分辨能力 做学问如果没有“明辨”，对所学内容不分真伪、良莠，就很难提升自己 因此，训练清晰分辨是非、真伪、善恶的能力，是做好学问的…
62	Nankai University	允公允能，日新月异	MOR3; ACT; INNO	“允公允能，日新月异”的校训，表达了南开人的价值取向和精神品质。 早在南开初创之时，校父严修便提出了“尚公”、“尚能”的主张，并在办学过程中一直践行“公能”二义。1934年，校长张伯苓化《诗经•鲁颂》中“允文允武”为“允公允能”作为南开校训。“允”为文言语首助词，“既、又”的意思。“允公允能”意即“既有公德，又有能力”，以培养学生“爱国爱群之公德，与服务社会之能力”。“日新月异”语本《礼记•大学》：“汤之盘铭曰：‘苟日新，日日新，又日新。”意即与时俱进，每天每月都要有所创新和发展。南开校训作为一种永久的精神力量、博大的精神力量、强烈的感召力量，启迪陶冶了一代又一代的南开人，鼓舞他们为民族的振兴和社会的发展贡献力量。
63	Tianjin University	实事求是	SCH	1915年，赵天麟校长颁布校训：“实事求是”。 天大品格：兴学强国”是我们的使命，是与生俱来的文化基因，是中国大学的精神元始。“实事求是”是我们的校训，从实际出发探索真理、把握规律，是百年办学的基本遵循。“严谨治学”是我们的校风，是在办学实践中形成的优良品格，是天大人的治学标准。“爱国奉献”是我们的传统，始终以国家和民族利益为重，是天大人的人生选择。“矢志创新”是我们的追求，勇立潮头，锐意进取，敢为人先，创新超越，是对至真至善孜孜以求的精神境界。坚持兴学强国的使命、实事求是的校训、严谨治学的校风、爱国奉献的传统和矢志创新的追求，是天大品格的核心表达，是激励全体天大人建设中国特色世界一流大学的强大精神动力。
64	Tianjin University of Science and Technology	尚德尚学尚行、爱国爱校爱人	MOR0; SCH; ACT; MOR3; MOR2; MOR2	尚德，是要育人先育己，教师师德在先； 尚学，终身学习，不断提升个人素质； 尚行，知行合一，不断实践新知，干出实事。 爱国，国富民强才有个人立身之地，才有个人的底气、信心、力量和支撑； 爱校，学校的兴衰荣辱直接关系到个人事业和生活的发展； 爱人，教师天职的必然要求，惟有热爱学生才能教育好学生。 建校以来，学校始终秉承“矢志服务国计民生，精心培育行业中坚”的办学初心，励精图治、砥砺奋进，涌现出了金培松、陈国符、隆言泉等一大批学术名家和行业翘楚，为中国轻工业发展作出了卓越贡献。爱国，已深深融入科大人的基因。希望同学们在大义与小利之间，在大我与小我之间，立大志、明大德、成大才、担大任，以青春之我、奋斗之我、奉献之我，谱写新时代的青春之歌！二是希望同学们治学修身，增添民族自信之底气。未来的几年里，同学们将在这里学真知、悟真谛、求真理，一定要敏而好学，切磋琢磨，质疑问难，举一反三；切忌囫囵吞枣，随波…
65	Tiangong University	严谨、严格、求实、求是	DIL; DIL; ACT; SCH	严谨：即严密谨慎，逻辑严密，思维缜密。“严谨”用于我校校训，旨在鼓励广大师生继续弘扬讲究逻辑、严谨治学的科学精神和一丝不苟、认真严密的做事态度，倡导广大师生尊重科学，谦虚谨慎，不骄不躁，追求卓越。 严格：即在遵守制度与掌握标准时认真不放松。“严格”用于我校校训，指制度严格、标准严格、措施严格、实施严格、考核严格。要求在办学的各项工作中，始终秉承严格管理、严格要求的精神，使各项工作都能上水平、出成果。 求实：即讲求实际，求真务实。“求实”用于我校校训，意在倡导广大师生做老实人，办老实事，言行一致，表里如一，不图虚名，不搞花架子，更不要不懂装懂，而是要实实在在，脚踏实地，求得实效，结出实果。 求是：即探索规律，把握规律。“求是”用于我校校训，要求广大师生献身科学，追求真理，实事求是，不兴虚浮，勇于创新，不畏权威；尊重事物自身的发展规律，按照科学发展观建设学校，发展学校各项事业。
66	Civil Aviation University of China	明德至善、弘毅兴邦	MOR0; MOR1; MOR1; MOR3	明德至善出自《礼记·大学》：“大学之道，在明明德，在亲民，在止于至善。”明德有三个具体内涵：一指光明之德,美德;二指才德兼备;三指彰明德行。明德要求知德、守德、行德。明德强调做人应注重美好的道德、品德。德既包括个人的品德，也指向对国家对社会的公德，即家国担当。明德更深层的要求是“止于至善”，即达到最高的道德境界，获得理想的人格。 明德最终的要求是“止于至善”。“止于至善”强调为善不移，守善不渝，不只要达到一种道德完善的境界，而且要坚守不失。“止”字兼含了“达到”与“持守”的双重含义，意味不仅要臻于至善之境，更要常守勿失，化为恒常不变的生活状态。在此校训中，至善除了指向道德、人格的完善，也表明民航学子在为人为学方面不断追求完美，严格要求自身的决心与抱负。 弘毅强调抱负远大，意志坚韧。出自《论语·泰伯》:“士不可以不弘毅，任重而道远。”朱熹有言:“弘，宽广也;毅，强忍也。非弘不能胜其重，非毅…
67	Tianjin University of Technology	重德重能、求实求新	MOR0; PROF; ACT; INNO	重德重能，就是注重品德品行以及专业能力的培养，求实求新就是要实事求是，追求真理，勇于实践，开拓创新。天理校训是“重德重能，求实求新”，即我们要以德能为本，以实新为范，重德重能做人，求实求新干事，成为一个德、智、体、美、劳全面发展，知识、能力、素质协调发展，具有实践能力和创新精神的人。
68	Tianjin Agricultural University	敏学切问，躬勤耕稼	SCH; SCH; DIL; PROF	敏学：勤奋好学，出自《论语-公治长》，子曰：“敏而好学，不耻下问，是以谓之文也。”切问：恳切地提问，出自《论语-子张》，子夏日：“博学而笃志，切问而近思，仁在其中矣。”勤能补拙、勤奋好学是学生成才的前提，普于提出问题、能够提出问题是学生成才的关键。 躬勤耕稼。躬：亲身，身体力行；勤：勤劳：耕稼：泛指种庄稼。“躬勤耕稼”语出《陈书-卷十列传第四》：“程灵洗，字玄涤，新安海宁人也。少以勇力闻，梁时以拒候景乱，授谯州刺史，入陈，官兰陵太守，以讨伐战功拜都督，郢州刺史，封重安县公，治军号令分明，与士卒同甘苦，又躬勤耕稼，老农不能及。”“躬勤耕稼”强调亲力亲为，贴近三农。“敏学切问”侧重理论知识积累，“躬勤耕稼”结合我校“农”的特色，寓意劳动实践，体现了“知行合一”，理论与实践相结合。
69	Tianjin Medical University	求真、至善	SCH; MOR1	“求真”是大学的精髓所在，也是大学有别于其他地方最显著的特征，所以成了许多国际著名大学包括哈佛大学的校训。“求”即追求;“真”指真理和真性情。 “求真”另外一层含义就是“真性情”。当前中国盛行着两种文化需要我们深刻反思：一是儒家思想中的中庸之道，推崇一种隐忍和适可而止的态度;二是实用主义，推崇追求有用和把效益最大化。这两种文化与大学精神不是统一的，致使有些人做事情阿谀奉承，风骨全无;有些人做学问浮夸急躁，急功近利。 “至善”出自《礼记大学》，“大学之道，在明明德，在亲民，在止于至善。“意为：求事理之极致。大家从事医学研究和医学实践，工作的对象是人，没什么比生命更宝贵，更神圣。 “求真”是大学的精髓所在，“求”即追求；“真”指真理和真性情。“至善”出自《礼记大学》，“大学之道，在明明德，在亲民，在止于至善。“意为：求事理之极致。 “求真”是对科学真理的追求，“至善”是对优秀卓越的精进。天医…
70	Tianjin University of Traditional Chinese Medicine	进德修业、继承创新	MOR0; SCH; INNO	进德：就有为医学献身的职业操守，有良好的医德，有为大众服务的精神。 修业：就是要不断进取、不断学习、不断研究、不断实践，通过学习掌握不断更新的医药学知识和临床经验，给患者提供最好的帮助。 继承：“师承”是学好中医药的重要手段，中华民族中医精粹需要通过继承传统才能发扬光大。 创新：在继承的基础上不断实践、总结和升华，运用现代科学技术和传统中医药研究方法，开展中医药科学研究，加强中西医结合研究，促进中医药理论和技术方法的不断完善，推动中医药现代化发展。
71	Tianjin Normal University	勤奋严谨,自树树人	DIL; DIL; MOR1; MOR2	勤奋，就是要勉力学习，毫不间断，有学习的热情；严谨，就是谨慎严密，有一丝不苟、严肃认真的治学方法，也就是有科学的态度，勤奋是热，严谨是冷，这是辩证的关系。自树指教育者先受教育，要严于律己；树人指培养人才为百年大计。要为人师表，严于育人。树人必先自树，自树才能树人。
72	Tianjin University of Technology and Education	爱国、敬业、团结、创新	MOR3; PROF; MOR2; INNO	爱国，是我们的政治基础；敬业，是师生员工必备的职业道德和从业态度；团结，是我们完成任务的基础保障；创新，是时代的要求，是我们前进的动力。
73	Tianjin Foreign Studies University	中外求索,德业竞进	WILL; MOR1; PROF	“中外求索”是指人才培养与科学研究既要扎根于中华民族，又要有广博的国际视野，追求真理于世界，博取古今中外文明精华，永无止境，不断求索，在提高中国软实力和促进中外文化交流中发挥跨文化交际桥梁作用。“德业竞进”是指人才培养与科学研究既要人格、学问并重，内外兼修，又要相互促进，以积极向上的开拓进取精神，将求知与修养结合起来，永葆生机与活力，厚德博学。追求品德高尚、专业精神、全面发展，为国家繁荣、世界和谐贡献力量。
74	Tianjin University of Commerce	笃学、弘毅、明德、济世	SCH; MOR1; MOR0; MOR3	笃学：语出《三国志·吴书·宗室传》“济阴人马普笃学好古，瑜厚礼之”。笃学即专心好学，充实而有恒。校训释义：专业基础，通识教育，创新能力，终身学习。 弘毅：语出《论语·泰伯》“士不可以不弘毅，任重而道远”。弘毅即宽宏坚毅，百折不挠。校训释义：强健体魄，坚强意志，不畏挫折，身心俱健。 明德：语出《礼记·大学》：“大学之道，在明明德，在亲民，在止于至善。”明德即知荣明耻，修身养性。校训释义：诚信做人，合作意识，助人为乐，理想远大。 济世：语出《论语·雍也》“博施于民而能济众”。济世即勇于担当，奉献社会。校训释义：自爱爱人，团队意识，民族精神，社会责任。
75	Tianjin University of Finance and Economics	学思达信	SCH; REAS; WILL; MOR1	“学”是手段，“思”是技能，“达”是目标。“信”是社会人的立身之本。
76	Tianjin University of Sport	学贵立德，动必有道	MOR0; PROF	学识、学业、学问，凡有所学，明德为先。 活动、行动、运动，一举一动，悟道为重。
77	Tianjin Conservatory of Music	追求完美,创造卓越	WILL; WILL	追求艺术和人格的完美，创造卓越的艺术成就。
78	Tianjin Academy of Fine Arts	崇德尚艺、力学力行	MOR0; PROF; SCH; ACT	学校秉承“崇德尚艺，力学力行”的校训，以建设中国特色、品质卓越、国际知名的一流美术学院为办学定位，培养人文厚重、基础扎实、技艺融通、创意活跃、德才兼备的高素质艺术人才。
79	Tianjin Chengjian University	重德重能、善学善建	MOR0; PROF; SCH; INNO	“重德重能”是对学校优良传统的凝炼升华，意为教书育人，德育为先，能力为重。重德要重品德、重职业道德；重能要重综合素质、重动手能力。 “善学善建”是对中国传统文化的凝炼创新。“善学”语出《礼记·学记》，“善学者，师逸而功倍，又从而庸之”；“善建”语出《老子》，“善建者不拔，善抱者不脱”。意为学会思考，学会学习，学会创新；在不断提高学习能力的基础上，强化实践，知由行出，知行合一，成为服务城建领域的卓越建设者。 校训意蕴深涵，激励广大师生勤修好学之德，妙用善学之法，创建经世之业。
80	Tianjin Sino-German University of Applied Sciences	崇实、求精、致良知	ACT; DIL; MOR1	崇实”—意为“崇尚实际，崇尚朴实”，语出东汉哲学家王充《论衡•定贤》。既强调做人要实、做事要实，脚踏实地，一切从实际出发，又强调“强实技、兴实业”，以实实在在的技术技能积累，实现实业兴国的理想抱负。 “求精” —意为“追求完美”，语出《论语•学而》及宋代朱熹的注解。既强调做每件事情都要精益求精，又倡导善思善行、寓创于精。 “致良知” —是明朝思想家王阳明心学思想的结晶,主要包含“心即理、知行合一、致良知”三个理论，而“致良知”全部包括了这三层意思。“良知”语出《孟子•尽心上》：“人之所不学而能者，其良能也，所不虑而知者，其良知也”。“良知”既是道德层面的善恶之心，也是认识层面的是非之心。“致良知”就是要求在实践中磨练明辨善恶是非的能力，做到知行合一、德能兼备。
81	Hebei University	实事求是	SCH	2018年9月6日，河北大学校党委常委会研究决定，该校校训由“实事求是，笃学诚行”恢复为原校训“实事求是”。 对于“实事求是”的新校训，《通告》中解释称，“实事求是”既包含了追求真知的态度与精神，又有经世致用的情怀与行动，是求真与务实的结合，是认知与行动的统一。“实事求是”不仅内涵丰富，包容性、开创性强，符合该校综合性大学的特征和创建一流大学的气势和胸怀，而且与社会主义核心价值观品格相通，气韵相融，简洁凝练，意境深远。 河北大学方面认为，大学校训植根于学校的历史传统，是大学立校的根基，是文化的基因，是思考的坐标，是一所大学的名片。建校至今，该校始终以“实事求是”作为校训的核心内容和表述方式，坚持“实事求是”的办学传统和精神，积淀了深厚的文化底蕴。 河北大学1921年创办于天津，初名“天津工商大学”。建校伊始，学校以工商立校，以科学为本，将中国传统治学精神与科学救国思潮相融合，奠定了学校崇…
82	Hebei University of Engineering	崇德尚善、精工铸新	MOR0; MOR1; DIL; INNO	崇德尚善。崇德，指崇尚道德，取自成语“崇德报功”。尚善，指追求美好，亦同“上善”，取自成语“上善若水”。崇德尚善，指对立德树人根本任务的落实，对社会主义核心价值观的践行，对高尚道德情操的弘扬，对一切美好的追求。 精工铸新。精工，指精致工巧，源自成语“精益求精”。铸新，指创造新的，取自成语“铸新淘旧”。精工铸新，指对精益求精的工匠精神的发扬，对学术技术的执着，对开放创新的坚持，对卓越极致的探求。 崇德尚善、精工铸新，是对原校训“立德立志、善学善行”的传承与升华，蕴含邯郸赵文化之精髓，体现大工程观和新工科等工程教育理念，是人文精神与科学精神的融合，是红与专的统一，是德与技的结合，是学校文化的核心。
83	Hebei GEO University	达观博物	WILL; SCH	语出东晋郭璞《注山海经叙》，原文为：“非天下之至通，难与言山海之义矣。呜呼！达观博物之客，其鉴之哉。” 作为校训，其含义主要是勉励师生：为学要高瞻远瞩，广智博识，见解通达，学伴终身；为人要胸襟博大，虚怀若谷，深明德义，淡泊名利。
84	Hebei University of Technology	勤慎公忠	DIL; DIL; MOR3; MOR3	释义： 勤：勤以治学 慎：慎以立身 公：公以对人 忠：忠以处事 “勤慎公忠”校训的形成及内涵阐释 1.“勤慎公忠”校训的形成溯源 “勤慎公忠”的校训是我校前身河北省立工业学院魏元光院长在从事工业教育几十年的实践过程中总结出来的。魏元光，著名工业教育家，曾先后任直隶公立工业专门学校、河北省立工业学院、国立中央工业职业学校等校校长，1929年-1936年，在任河北省立工业学院院长期间，一直用“勤慎公忠”的思想和精神指导办学，教育师生，带领河北省立工业学院取得辉煌的成就，其教学设施设备、师资力量、教学质量均属国内一流，并且培养了一大批工程技术人才。 1936年，魏元光于河北省立工业学院院长任上奉命筹组国立中央工业职业学校，1937年被任命为该校校长。1937年10月15日，魏元光院（校）长基于在河北省立工业学院时期对人才培养和办学实践的认识，在国立中央工业职业学校开学典礼上首次明确提出“勤慎公…
85	North China University of Science and Technology	明德博学、勤奋求实	MOR0; SCH; DIL; ACT	要求学生能够做到品德高尚，博思广学，勤奋学习，脚踏实地。 秉承“学术并举、崇术重用、依托行业、服务地方”的办学理念，恪守“明德博学、勤奋求实”的校训精神，实施“特色立校、人才兴校、质量强校、改革驱动、融合发展、多元一流”发展战略，全面提升学校综合实力和核心竞争力，全力谱写华北理工大学新的辉煌。
86	Hebei University of Science & Technology	兴业尽责	PROF; MOR2	“兴业尽责”是对我校师生品质的凝练，是对师生行为的内在要求，旨在强化师生的事业心和责任感。 兴业:“业”指学业、事业、实业，“兴”取兴盛、兴旺之意。“兴业”是对师生价值取向的要求，激励师生常怀“兴业”之心，凝心聚力做大事。 尽责:“责”包括个人职责、家庭职责、学校职责、社会职责“尽”取尽心、尽力、全部用出之意。“尽责”是对师生道德取向的要求，激励师生人人“尽责”、精益求精，永葆生机与活力。
87	Hebei University of Architecture	求实进取	ACT; WILL	“求实”，即追求客观现实，从实际出发，要脚踏实，扎扎实实； “进取”，即不断学习，不断总结，不断进步，不断超越自己，用永满足。
88	Hebei University of Water Resources and Electric Engineering	勤奋、求是、创新、笃行	DIL; SCH; INNO; ACT	代表了我校一直秉承的优良校风，又是每个人在新时期不断自勉、奋力前进的座右铭。
89	Hebei Agricultural University	崇德、务实、求是	MOR0; ACT; SCH	“崇德 务实 求是”可以通俗地理解为：注重师生思想道德修养，脚踏实地刻苦实践；持之以恒、矢志不渝地学习科学知识，开展科学研究，探索自然规律，追求科学真理。 崇德—加强思想品德修养。 务实—艰苦朴素，说实在话，做实在人，办实在事，求实际效果，反对形式主义。 求是—实事求是。语出《汉书 · 河间献王传》，原文是：“修学好古，实事求是。从民得善书，必为好写与之，留其真。”唐人颜师古注解说：“务得实事，每求真是也。”意思就是根据实证，求索真相。毛泽东采用了这句成语的形式，吸收了它朴素合理的含意，运用马克思主义的观点进行了科学的阐释。他在《改造我们的学习》（ 1942 年）一文中指出：“‘实事'就是客观存在着的一切事物，‘是'就是客观事物的内部联系，即规律性，‘求'就是我们去研究。” “崇德 务实 求是”，既是思想与行为的结合和辩证统一，又是理论与实践的结合和辩证统一。包涵了由认识到实践，再由实践…
90	Hebei Medical University	明德博学、行方智圆	MOR0; SCH; ACT; SCH	“明德”：出自《大学》：“大学之道，在明明德，在亲民，在止于至善。” “博学”：语出《礼记·中庸》：“博学之，审问之，慎思之，明辨之，笃行之。”《论语》：“博学而笃志，切问而近思；仁在其中矣。” “行方智圆”：出自明·李中梓《医宗必读·行方智圆心小胆大论》：“宅心醇谨，举动安和，言无轻吐，目无乱视，忌心勿起，贪念罔生，毋忽贫贱 ，毋惮疲劳，检医典而精求，对疾苦而悲悯，如是者谓之行方。禀赋有厚薄，年岁有老少，身形有肥瘦，性情有缓急，境地有贵贱，风气有柔强，天时有寒热，昼夜有重轻，气色有吉凶，声音有高下，受病有久新，运气有太过不及，知常知变，能神能明，如是者谓之智圆。” 加强修养，品德为先；博极医源，精勤不倦；坚持理论与实践的结合，继承与创新的结合，高尚品格与精湛技艺的结合，有方有圆，知行统一。
91	Hebei North University	厚德、远志、笃学、创新	MOR0; WILL; SCH; INNO	“厚德”就是明辨曲直、是非，知荣知耻，去恶从德善。 “远志”就是要树立远大的理想和抱负，这是人的行为指南。 “笃学”就是要有刻苦学习，沉淀知识的精神。 “创新”就是具有积极进取的开拓精神和求新、创造的意识。
92	Chengde Medical University	严谨、求实、勤奋、创新	DIL; ACT; DIL; INNO	建校以来，学校秉承“政治坚定、仁爱至诚、敬佑生命、甘于奉献”的承医精神，“仁爱至诚、知行合一”的办学理念，恪守“严谨、求实、勤奋、创新”的校训，坚持社会主义办学方向，坚持立德树人的根本任务，在办好人民满意的高等教育征途上，开拓奋进、砥砺前行。
93	Hebei Normal University	怀天下，求真知	MOR3; SCH	“怀天下”，是告诫学生要有理想有抱负，能够树立远大目标，以振兴祖国大业为己任，为实现祖国的繁荣昌盛贡献力量，乃至为全人类的和谐共存尽心尽力； “求真知”，是教育学子要有一丝不苟的求学态度，认真钻研探索，不盲从、不迷信，在学术上有所建树，继承发展优秀文化，掌握好建设祖国的真才实学。
94	Baoding University	德业兼修、知行并重	MOR0; PROF; SCH; ACT	践行“德业兼修、知行并重”的校训，向书本学、向榜样学、向实践学，将在学校锤炼的品德修为，练就过的硬本领与实践相结合，让青春在服务国家中熠熠生辉。
95	Hebei Normal University for Nationalities	修德砺能、博学致远	MOR1; PROF; SCH; WILL	修德：语出《大学》：“大学之道，在明明德”：“自天子以至庶人，壹是皆以修身为本”。“修”原意为“美好”，后引申为学习、培养。“德"指道德品行。修德是指我院师生要培养高尚的道德情操，养成良好的职业道德，追求美好的精神境界。 砺能：语出《尚书》：“砺乃锋刃，无敢不善”。“砺“原意为名词“磨刀石“和动词”磨”，后引申为“锻炼、磨练”。“能”语出《诗经》：“各奏尔能。“指才干和技能。砺能是指我院师生要坚持理论与实践相结合，强化技能训练，培养高素质技能型专门人才。同时，也对学生毕业后的刻苦磨炼和教职工的教育、教学、科研、管理、服务能力提出了要求。 “博学致远”强调的是学识修为的重要性，没有渊博的知识，就无法施展自己的抱负，达至人生美好的境界；只有静下心性潜心求学，博思审问，融贯中西，博采众长，才能高瞻远瞩，实现抱负。
96	Tangshan Normal University	勤思笃学,修身律己	REAS; SCH; MOR1; MOR1	激励广大师生为学要勤思笃学，为师要修身律己。为人师者，没有深厚的知识不足以立业，没有高尚的修为，不足以正身。
97	Langfang Normal University	厚德博学、弘毅致远	MOR0; SCH; MOR1; WILL	“厚德”：出自《周易》“地势坤，君子以厚德载物”。意谓：大地的气势厚实和顺，君子应增厚美德，容载万物。老子在《道德经》中指出：“修之于身，其德乃真”，强调“德”是立命、处人、治世关键所在。以“厚德”作为校训组成部分，意在勉励学校师生员工以“德”作为修身目标，以德立身、以德施教、以德治校。 “博学”：出自《论语·子张》“博学而笃志,切问而近思”以及《论语·雍也》“子曰：‘君子博学于文，约之以礼，亦可以弗畔矣夫！’”。《荀子·劝学》中也说：君子博学而日参省乎己，则知明而行无过矣。以此作为校训组成部分，旨在期望师生员工努力学习，博采众长，追求广博学识和渊博学问。 “弘毅”：出自《论语·泰伯第八》“士不可不弘毅，任重而道远”，词义即坚强刚毅。以此作为校训组成部分，意在体现学校坚持艰苦奋斗的办学精神和创业精神，勉励师生刻苦、坚韧、自强、求真。 “致远”：出自诸葛亮《诫子书》“非淡泊无以明志，非宁静…
98	Hengshui University	守正出新	MOR1; INNO	守正出新”语出《道德经》，意在“笃守正道，以新制胜”。是为校训。 “守正”主旨有四：守道德之正，传承优秀道德理念和规范，形成良好的道德自觉；守学问之正，完整继承前人学术成果，养成严谨学风，师生共同进步；守处世之正，笃守正道，诚实平和，严以律己，养成团队精神；守行事之正，勤于实践，扎实做事。 “出新”的要旨是创新。提倡述而有作，敢于挑战权威，善于探索新知，正确看待失败，尊重个性发展，逐步建立超越前人的知识体系和技能体系，继承中追求创新，平实中体现新奇。
99	Shijiazhuang University	厚德博学，崇实求新	MOR0; SCH; ACT; INNO	“厚德”是指高尚的品德，高尚的情操，取自《易经》中的卦辞“天行健，君子以自强不息；地势坤，君子以厚德载物”。立德树人也是希望学生拥有高尚的品德和情操。 “博学”一词源出于孔子的《论语》，《论语·雍也》篇说“君子博学于文，约之以礼”。意思是要有渊博的知识，也是希望学生通过大学四年的学习生活拥有渊博的知识。 “崇实求新”的意思是尊重事实，追求真理；去浮存实，去伪存真。在此基础上要勇于开拓创新。而这四个字也正是学校对学生所寄托的殷切希冀，希望学生在追求真理的路上都能不断创新前行。
100	Handan University	潜心养德、倾心修能、用心践行	MOR0; PROF; ACT	一、潜心养德：用爱心奠定人生的根基 “人无德不立，业无德不兴，国无德不强”。 潜心修养道德品质，做一个有道德的人，是邯郸学院对每一位同学提出的基本要求。道德的要素是什么？孔子说是5个字“仁义礼智信”，高度概括；国家《公民道德建设纲要》用了20个字“文明礼貌、助人为乐、爱护公物、保护环境、遵纪守法”，很具体。这就是修养道德的标准。那么怎样修养自身的道德？著名诗人雪莱曾经说过，“道德的最大秘密就是爱；或者说，就是逾越我们自己的本性，而溶于旁人的思想、行为或人格中存在的美。”同学们大多从出生开始就是家庭的中心，习惯了被动接受长辈的宠爱，现在要学会去理解别人、关心别人、爱护别人，要学会主动付出，学会感恩，融入团队。军训是同学们大学生活的第一课，也是历练道德品质的最好平台。所以，大家要从现在开始，遵守纪律，关心同学、帮助他人、爱护环境，文明礼貌，认真军训。只有富有爱心、道德完善、真心付出、纪律性强…
101	XingTai University	纯德实学	MOR0; SCH	“纯德实学”出自元朝齐履谦（元朝太史院使）《知太史院事郭公行状》：“七年，诏内外官年及七十，并听致仕。公以旧臣，且朝廷所施为，独不许其请。翰林太史司天官不致仕者，咸自公始。延祐三年某月日卒，年八十六，公以纯德实学为世师法，然其不可及者有三：一曰水利之学；二曰历数之学；三曰仪象制度之学”。 纯德即高尚的道德，纯真的情操；实学，即学以致用，用自己的知识造福社会，造福人类。纯德实学是对元代著名科学家郭守敬的道德品格和科学精神的高度评价。 纯德：即培养有理想、有道德的人才，体现了“育人为本，德育为先”的育人理念。实学：强调求实态度，强调学以致用，服务社会。 纯德实学作为校训，反映了邢台学院作为邢台地方高校，要传承郭守敬这种精神，并以郭守敬精神为指引，培养社会需要之实用人才，具有鲜明的地域文化特色和激励、指引作用。 纯德实学作为校训，对师生政治思想追求、道德情操培养和专业学习提出了目标要求，强调知…
102	Cangzhou Normal University	明德博学、知行日新	MOR0; SCH; SCH; ACT	博学明德者，讲的是做为一个教师所应具备的知识架构和道德修养。学，然后知不足，这不只是对学生的要求，也当成为每一个为人师者的座右铭。只有通过不断的学习，提高认知的深度和广度，使自己的所思所学体系化、理论化，才能在教学中更有效更精准的把自己的知识传授给学生，才能有针对性的解决学生学习过程中所存在的问题，才能使学生不止是一个知识的接受者，也是智慧的探索者，有所学有所思才能为自己的人生开出一片新天地。 所谓“知行日新”，所要求者在于能让所学所闻不止停留于知解层面，知识不应沦为玄谈的工具，还需躬身而行，所有知识均需以自身实践相结合、落实到实际操作层面上才能印证所学所知。通过实践，发现问题，反复求证进一步加深对所学知识的理解，而所有的智慧也只有经历此一过程才能更有效的指导我们的人生。也正是在此意义上，明代大儒王阳明提出“知行合一”之概念后，才能被此后的历代儒家学者奉为治学修身之圭臬。
103	Shijiazhuang Tiedao University	慎思明辨、知行合一	REAS; REAS; ACT	学校在长期的办学实践中，始终秉持“慎思明辨，知行合一”的校训，坚持“严谨治学、勇于创新、精心育人、志在四方”的校风，秉承“质量第一、内涵发展、特色取胜、追求卓越”的办学理念，突出“军魂永驻，校企结合，育艰苦创业人”的办学特色，致力于建设高水平知名特色大学。
104	Yanshan University	厚德、博学、求是	MOR0; SCH; SCH	厚德、博学、求是，是燕山大学的校训。一代代师生在“厚德、博学、求是”的引领下不断提升自我。 百年薪火继，勇做追梦人。走在燕山大学新百年的浩瀚征途中，燕大人将始终不忘初心，牢记使命。用赤诚的爱国之心和报国之志，在各自的岗位上精益求精，团结奋进，追求卓越。用实际行动守望着燕大的梦想和祖国的未来。
105	Hebei Normal University Of Science & Technology	敏学、修身、乐业、创新	SCH; MOR1; PROF; INNO	80年薪火相传，80年弦歌不辍。河北科技师范学院前身始建于1941年。建国后，学校先后更名为河北昌黎农业学校、昌黎农学院、昌黎农业专科学校、唐山地区农业学校、华北农大唐山分校、河北农大唐山分校、河北农大昌黎分校、河北农业技术师范学院、河北职业技术师范学院和河北科技师范学院。经过80年的建设和发展，学校始终立足河北，面向全国，以立德树人为根本，凝练了“敏学、修身、乐业、创新”的校训。目前已成为教育部首批全国重点建设职教师资培养培训基地、科技部国家级科技特派员创业培训基地、农业部现代农业技术培训基地、中国科协首批全国科普教育基地，是河北省首批转型发展试点院校、河北省创新创业教育示范高校。
106	Tangshan University	诚信奋斗为人,严谨求真为学	MOR; DIL; MOR1; DIL; SCH; SCH	做人的原则“诚信奋斗”四个字，包含着三个方面的要求：一是“诚”，对人对事要诚实、真诚、忠诚；一是“信”，人际交往中讲求信用、一诺千金；一是“奋斗”，人都是要做事的，对待事业要顽强拼搏，不懈奋斗，成就一番事业。 “为学”既指教师做学问，搞研究，也指学生对待学业的态度。师生对待学术学业的共同要求和准则是“严谨求真”，这同样包括着三个方面的要求：一是“严”，要用严肃、严格、严细态度做学问、读书学习；一是“谨”，谨慎、虔诚、崇敬，不能大大咧咧马马虎虎地对待学术学业；一是“求真”，没有了认真，就谈不上学术成就和学业进步。
107	North China Institute of Science and Technology	自立立人,兴安安国	WILL; MOR3	秉承自强不息的中华民族精神，坚持以立己、立人为责任和目标,积极促进安全生产事业的兴旺发达，为社会平安和谐、国家文明富强作出更大贡献。
108	China People’s Police University	进德修业、精武博文	MOR0; PROF; PROF; SCH	德与业兼顾，教与学兼容，凸显了中国人民武装警察部队学院作为公安现役高校的时代风貌，反映了学院的办学理念和办学特色。 “进”，指增进、养成；“德”，为品德、操守。“进德”，即不断增进品德修养。“修”，指学习、研修、实践、建立；“业”，为学业、专业、功业。“修业”，即学好专业，完成学业，学有所成，服务社会，建功立业。“进德”与“修业”是学生进学的两大任务，学生既要培养自己的崇高思想品德，又要珍惜学习机会，打好知识基础，培养实践能力，发展创新思维。 “精”，指精通、擅长、精益求精；“武”，为体能、技能、军事、业务素质。“精武”，即强健体魄，军事及业务技能过硬。“博”指厚、宽、实；“文”，为文学、文化、科学技术知识。“博文”，即广读博览，知识渊博，具有人文精神。“精武博文”，意思是能文能武，既要专业技能精湛，又要文化功底深厚。 校训突出了学院“宽口径、厚基础、重特色”的人才培养模式，体现了学院的…
109	Hebei Institute of Physical Education	崇德、砺能、笃学、拓新	MOR0; WILL; SCH; INNO	“崇德”就是崇尚品德，注重道德品性的修养。将“崇德”列为首位，则能很好的体现了学校的“育人为本，以德为先”的思想。 “砺能”就是磨砺意志能力，注重坚强意志的锻炼和养成。传统教育思想强调“金就砺则利”（《荀子·劝学》），“砺能”就是要求学生要有志向，志存高远，有爱国之心，报国之志，并且具备坚强的意志和刚毅果敢的品格。 “笃学”——语出《论语·泰伯八》中“笃信好学”。笃，笃实，深厚之意。笃学，即指追求学问要专心、认真。 “拓新”： 即是开拓创新。社会竞争日趋激烈，没有开拓创新，就没有发展的原动力和持续力。
110	Hebei Finance University	明德守信、求真尚行	MOR0; MOR1; SCH; ACT	“明德”，语出《礼记·大学》“大学之道，在明明德，在亲民，在止于至善。” “明德”即弘扬光大崇高的道德情操和理想追求。对学校而言，德为育人之本；对学子而言，德为成人之本。彰显我校以德治校、以德育人。 “守信”，孔子曰“人无信而不立”。诚实守信是一切职业道德的立足点，也是人生和事业成功的基础。作为主要培养金融财经类专业人才的金融院校，“守信”体现了“诚信为金，博学为融”树人理念。 “求真”即为“求是”，也就是不断地认识事物的本质，把握事物的规律，追求真理。“求真”要求师生崇尚科学，实事求是，探索真知。 “尚行”出自《皇极经世书·观物篇》，意为崇尚实践。我国历代先哲论学皆崇尚践行，荀子明确提出“不闻不若闻之，闻之不若见之，见之不若知之，知之不若行之。”“尚行”要求摒绝空谈，注重理论联系实际，培养应用型人才。 “明德 守信 求真 尚行”，内涵熔古铸今，主旨寓意深远。“明德”是根本，“守信”是态…
111	North China Institute of Aerospace Engineering	进德修业，精益求精	MOR0; SCH; DIL	“进德修业”典出于《周易》“九三曰：君子终日乾乾，夕惕若，厉无咎。”何谓也？子曰：“君子进德修业，忠信，所以进德也。修辞立其诚，所以居业也”意为“君子致力于培育品德，增进学业。以忠信来培养品德，以修饰言辞来建立诚信，这是操持自己事业的立足点。 “精益求精”典出于宋代朱熹对《论语·学而》中“《诗》云：如切如磋，如琢如磨。”这句话所作的注：“言治骨角者，既切之而复磋之；治玉石者，既琢之而复磨之，治之已精，而益求其精也。” 意为“要像加工象牙和骨那样，切了还要磋；要像加工玉石那样，琢了还要磨。加工的已经很精细了，还要更求精细。 校训“进德修业、精益求精”就是要求师生无论是培育品德还是增进学业，都要精益求精。
112	Institute of Disaster Prevention	崇德博智、扶危定倾	MOR0; SCH; MOR3	“崇德博智”，出自防灾减灾鼻祖张衡之《应间》：“君子不患位之不尊，而患德之不崇；不耻禄之不夥，而耻智之不博。”意为崇尚道德、博取智慧，取德才兼备、全面发展之意，寓含学校的人才培养目标要求和办学理念。 “扶危定倾”，原意谓匡救危急倾覆中的国势。《周书•梁御传》：“宇文夏州英姿不世，算略无方，方欲扶危定倾，匡复京洛”。既寓含办学理念——培养经世安邦的栋梁之才（原义），又凸显了办学特色——防灾减灾、扶危救难（引申义）。训导师生巩固专业思想、立志献身防灾减灾事业，报效国家、服务人民。
113	Hebei University of Economics and Business	严谨为师 、勤奋为学、诚信为人	PROF; SCH; MOR1	严谨为师：取自韩昌黎之《师说》——古之学者必有师。师者，所以传道、受业、解惑也。师之大者，为使其徒尽其所能。老师应当以教授学生做人为己任，先正其身，严谨而为之。 勤奋为学：学生学习乃天经地义之事，欲兴我中华或实现矢志之梦想，应以勤奋为学为根基，所谓天道酬勤，学习之事不能容半点虚伪与骄傲之心，当勤勉而为之。当谨记学习如逆水行舟，不进则退而自勉。 诚信为人：信乃做人之本，人无信不立，业无信不兴。做事做人之基本原则乃诚信也。
114	The National Police University for Criminal Justice	崇德、尚法、博学、强警	MOR0; PROF; SCH; PROF	崇德”之“崇”是推崇的意思，“德”，是道德、德行，也就是人的品质或品格，“崇德”即主张人要推崇高尚的品格，这是为人之本，把它列于首位，体现了“育人为本、德育为先”的办学指导思想。 尚法，就是崇尚法律,尊重法律。 博学：“博”，大通也。（《说文》）即宽广、广博之谓。现代综合性大学，在专业、学科等方面都应具有“博”的特点，在学术思想、学术风格、学术观点上应兼容并包、百花争艳；作为教师，应学识渊博、造诣精深；作为学生，应打下厚实的功底，全面提升综合素质。 强警，要求从严治警、依法管警、精心育警、从优待警，通过制度创新和完善，造就一支政治坚定、业务精通、作风优良、执法公正的高素质人民警察队伍。
115	Hebei Vocational University of Industry and Technology	知行合一、明德修技	ACT; MOR0; PROF	只有曾用校训的解读：明德就是人为本，德为先，培养师生崇高的精神和高尚的人格；团结就是讲团结，干事业，不断增强凝聚力和战斗力；自强就是自立自强，奋斗不息，永远保持艰苦奋斗、拼搏向上的工作作风。 作为一所文化底蕴深厚的钢铁冶金特色院校，建校60多年来，我院与河北钢铁产业同发展、共成长，主动担当“践行钢铁报国，培育钢铁工匠”的宗旨使命，以“建设世界一流钢铁冶金高职院校、培育钢铁产业大国工匠”为目标愿景，铸就了“明德、团结、自强”的校训和“勤奋、务实、创新”的校风，使严明的生产纪律、不畏艰苦的意志品质、忘我的劳动热情和一丝不苟的工作作风，深深印入河北工院钢铁人的血脉中，形成了“铁的纪律、钢的意志、火的热情”的工院精神，涌现出“全国劳动模范”、“全国五一劳动奖章”获得者荣彦明，“全国钢铁行业技术能手”孟庆炜，“中国精益匠人”曹元军等一大批技术能手、管理精英、创业英才。
116	Hebei Vocational University of Technology and Engineering	德能并蓄、敏行担当	MOR0; ACT; ACT; MOR2	德能并蓄，体现了我校重视品德修养和能力培养的教育思想与办学理念。“德”即品德，操 行，乃 为人之本。“能”即能力，技能，是做事之基。“蓄”，积也，聚也。“德能并蓄”强调的是一起培养，共同 提高，将良好的思想品德与能力素养融于一身，倡导师生既要不断完善思想道德品质、形成健全的人格和良好 的职业道德，又不断丰富专业知识、提升专业技能和综合能力，以高尚的道德立身，以卓越的才能承载经济社 会发展重任。 敏行担当，是学校成长发展的强大内在驱动力，体现了我校在军队办学和高职办学过程中抢抓机遇、 勇挑重担、知难而进、开拓创新、敢为人先的精神内涵。“敏”即敏捷、快捷，“行”即行动、实践，“敏行 ”指的是军人作风，行动迅速。“担当”即“接受并负起责任” ，担当是一种使命，一种责任，一种品德，一 种主动实践，它是人一生的职责，无论对国家、对社会、对单位、对家庭。“敏行担当”倡导师生要敏于行动 ，做事不拖沓，…
117	Hebei Petroleum University of Technology	道艺兼修，敬业乐群	SCH; PROF; PROF; MOR2	“道艺兼修”，源出于王世杰1937年为学校是年学生毕业纪念的题词。“道艺兼修”在《汉语大词典》中，“道艺”指学问和技能。 “敬业乐群”，源出于林森同样是在1937年为学校是年学生毕业纪念的题词。“敬业乐群”实际上在《礼记•学记》中就有，即“一年视离经辨志，三年视敬业乐群”。“敬业乐群”是个体面对社会人群的一种高尚的价值取向，是超越自我的道德升华。青年学生应把“敬业乐群”作为自已世界观和人生观的基础，确立自已正确的人生目标和道德理想，“先天下之忧而忧，后天下之乐而乐”，将为祖国为人民乃至为全人类的共同利益而奋斗作为自已行为的指南。 “道艺兼修”可引申为重德重技、德技并举之意。“敬业乐群”的核心就是敬重职业、专注职业、强调团队协作。两句校训，言简意赅，既有实实在在的历史出处，又阐释出高等职业教育人才培养的特有风韵，更彰显着的鲜明魅力所在。 “敬业乐群”语出《礼记》，意为认真恭谨地对待自己的分…
118	Hebei University of Chinese Medicine	博学求源、厚德济世	SCH; MOR0; MOR3	校训是广大师生共同遵守的基本行为准则与道德规范，是办学理念、治校精神的反映，是校园文化建设的重要内容，体现大学文化精神的核心内容。现有的校训是在学校学生处几位同志提交方案的基础上，经广泛听取学校师生意见和学校党委常委会研究修订后，于2014年4月在首届河北中医学院教职工代表大会和工会会员代表大会上获得通过的。 博学求源 意在体现医学生的学识素养。 “博学”：出自《论语》，“博学而笃志，切问而近思，仁在其中矣。”《中庸》也有“博学之，审问之，慎思之，明辨之，笃行之”的论述。 “求源”：溯本求源之意，出自唐代名医孙思邈《备急千金要方·大医精诚》“博极医源，精勤不倦”。 厚德济世 意在体现医学生的人文情怀。 “厚德”：语出《易经·坤卦》，“地势坤，君子以厚德载物”。“厚德”就是要不断提高自身的品德修养和道德水平，做到理想崇高、信念坚定、情操高尚、人格完善，像大地一样，包容万物，无所不载。 “济…
119	Zhangjiakou University	自强、拼搏、求实、创新	WILL; WILL; ACT; INNO	学校秉承“自强、拼搏、求实、创新”的校训精神，明确以“人才培养为重、面向基层需要、服务区域发展”的办学宗旨，多年来为京津冀及周边地区培养了6万余名适应经济社会发展需要的优秀毕业生，近几年应届毕业生的就业率均在95%以上，位于全省高校前列。 办学定位：以人才培养为中心，立足张家口，面向京津冀，辐射周边，服务基层，面向一线，全面建成服务区域经济社会发展的教学应用型本科院校。 人才培养目标定位：适应区域经济社会发展需求，适应基本公共服务领域和中小微企业发展需要，培养扎根基层，服务一线，具有良好的社会责任感和职业道德，实践能力突出、综合素质高，具备可持续发展能力和创新精神的高素质应用型人才。
120	Hebei University of Environmental Engineering	团结、严谨、求实、创新	MOR2; DIL; ACT; INNO	建校以来，学校始终坚持曲格平老院长题写的“团结、严谨、求实、创新”的校训，坚守环保初心，秉持“人与社会相适应，人与自然相和谐”的办学理念，逐渐形成了“团结一心、敢打硬仗、以校为家、荣辱与共”的学校精神。
121	Shanxi University	中西会通、求真至善、登崇俊良、自强报国	SCH; SCH; MOR1; MOR3; WILL; MOR3	“中西会通”就是本土文化与外来文化的融合。山西大学初创伊始，设立中学专斋与西学专斋，教学内容中西融合。学校创办的山西大学堂译书院，引进和传播了先进的科学技术知识和学术思想。 “求真至善”就是科学精神与人文精神相融合。中学专斋初办时，所设课程分经、史、政、艺四科，西学专斋开设的课程一般是近代科学，是文理多科综合大学的起源。 “登崇俊良”就是知识传授与道德养成的融合。山西大学堂创办之初就选用韩愈的名言“登崇俊良”作为校训，“得天下英才而育之”的办学宗旨可见一斑。 “自强报国”就是学校发展与民族崛起的融合。回顾历史，山西大学这所学府，始终把“应国家之需要”作为根植血脉的精神内核。从五四运动到抗战烽火，学校始终为科学救国、教育救国艰辛求索。
122	Taiyuan University of Science and Technology	负重奋进、笃行求实	WILL; ACT; ACT	负重，就是主动肩负起为国家重型机械行业发展而努力的历史使命，也是学校在艰苦条件下办好大学的真实写照。 奋进，就是学校没有因为困难而退缩不前，也没有因为取得的一点成绩而固步自封，“奋进”是科大人适应时代发展潮流，与时俱进的精神状态的描述。 笃行，是学校全体师生的人生准则，不事张扬，讲究实干，用实际行动来实践学校师生对民族工业脊梁所许下的承诺。 求实，是学校的一贯作风，踏踏实实做事，实实在在做人，以服务求生存，以贡献求发展，努力培养品行忠实、作风踏实、功底扎实的人才。 白培康校长向广大毕业生再次分享了学校“负重奋进，笃行求实”校训的内涵，寄语广大毕业生传承校训精神：一是不忘肩负的重任。要始终胸怀祖国和人民，将个人的小我融入国家发展、民族复兴、人民幸福的大我，背负使命，负重前行；二是坚持不懈地奋斗。要不负时代，勇于面对人生道路上的艰难险阻，勇做走在时代前列的奋进者、开拓者、奉献者，用驰而不息的…
123	North University of China	致知于行	ACT	“致知于行”，指如何做事、做学问。荀子曰：不闻不若闻之，闻之不若见之，见之不若知之，知之不若行之（《儒效》）。“知”，指读书学习，延伸为博学广知；“行”，指实践、身体力行，延伸为不断实践创新；“致知于行”意喻知行合一，强调“知”与“行”的高度统一；同时，“致知于行”为成人、成材之渐进、逻辑过程，符合大学教育的客观规律。
124	Taiyuan University of Technology	求实、创新	ACT; INNO	理工大学的校训“求实创新”，其中“求实”就是“求真”的意思。做学问的最高境界，就在于“真”，而“真”的前提是“深”：学习和研究，有深度，才能抓住根本，才能形成特色，才能做出分量。
125	Shanxi Agricultural University	勤奋、求实、团结、进取	DIL; ACT; MOR2; WILL	2017校训征集公告 百年校庆以来，我校持续发扬“崇学事农，艰苦兴校”的办学精神，不断提升学校的综合实力。 校训彰显学校鲜明的办学特色，蕴含文化内涵和价值取向，是浓缩学校办学理念、悠久历史和人文风貌的一张文化名片，具有极强的教育意义和凝聚力。具体要求： （1）主题鲜明，体现山西农业大学百年办学历史、传统底蕴、学科特色和时代精神。 （2）文字精炼，寓意深远，激励人心。 （3）附文字寓意简要说明，如出自典籍请注明。 2014校训征集公告 校训、校歌集中体现学校的办学传统、办学理念和办学特色，是学校形象的重要符号和标识，是教育师生的重要组成部分，有着内聚人心、外展形象、传承历史、激励奋进的积极作用。为了继承和发扬我校优良办学传统，团结和凝聚广大师生员工和社会各界人士的智慧和力量，为建设“地方农业院校先进水平的教学研究型大学”提供强大的精神动力，山西农业大学决定开展校训、校歌的征集活动。征集要求…
126	Shanxi Medical University	医理博精,德能高邃	PROF; MOR0; PROF	从山西医学传习所到现代大学，学校始终根植于华夏文明、三晋沃土，秉承“医师之十德”，培养和造就了一大批卓越人才。进入新时代，学校高扬“医理博精，德能高邃”校训、“献身、务实、团结、进取”校风、“求实精进、坚韧弘毅”精神，努力建设全国一流研究应用型医科大学。
127	Changzhi Medical College	厚德、精业、济世、报国	MOR0; DIL; MOR3; MOR3	校训内容为“厚德、精业、济世、报国”，既反映学校深厚的文化底蕴和红色历史传承，又彰显医学院校本质属性和时代特色；语言简洁明快，深邃隽永，发人深省，催人奋进，富有感召力和凝聚力，能得到广大师生员工认可。“厚德”语出《易经》：“天行健，君子以自强不息；地势坤，君子以厚德载物”。“厚德”即广厚之德。“厚”的直接语义是指“深、重、多”、“宽容、厚德、忠厚、宽厚、仁厚”。指的是提高道德修养。“厚德”列为校训之首既是立德树人、德育为先的标志，更是质量教育要培养“仁心、厚德”的专业人才的应有之义。期望全校师生员工以高尚道德立身并承载天下重任。“精业”原义出于韩愈《进学解》“业精于勤、荒于嬉”。“精业”意有医学教育为精英教育，学制长，学位要求高，必须有更高远志向和更精准的技术。“精业”更是我校光荣传统中的白求恩精神的发扬光大之必需，毛泽东说“白求恩是个医生，他以医疗为职业，对技术精益求精”。“精业”要求…
128	Shanxi Normal University	团结、创造、求实、奋进	MOR2; INNO; ACT; WILL	希望同学们始终秉承师大“团结、创造、求实、奋进”的校训精神，传承师大人特有的精神气质和品行操守，勇立时代潮头，勇担复兴大任，用青春和汗水谱写属于新一代人的奋斗史。【校长致辞】
129	Taiyuan Normal University	崇德、博学、团结、创新	MOR0; SCH; MOR2; INNO	崇德：“大学之道，在明明德。”“崇德”即传承优良教育传统，遵循党的教育方针，彰显了“育人为本，德育为先”的教育宗旨。 博学：语出《中庸》“博学之，审问之，笃行之”，体现了“厚基础、宽口径、重应用”的教育教学观念和人才培养模式。 团结：强调凝聚人心、凝聚力量。意味着兼容并包、海纳百川的襟怀，求同存异、和谐共生的境界。 创新：旨在与时偕行，面向未来。对于教师而言，是日新月异的期许；对于学子而言，是“苟日新、又日新、日日新”的激励。
130	Shanxi Datong University	厚德、博学、慎思、笃行	MOR0; SCH; REAS; ACT	山西大同大学校训语出《周易》“天行健，君子以自强不息；地势坤，君子以厚德载物”和《礼记 f中庸》“博学之，审问之，慎思之，明辨之，笃行之”，旨在倡导师生要以德立身、雅量容人，博采众长、兼容并蓄，严谨治学、实事求是，笃行致远、不骛虚声。
131	Jinzhong University	明德、博学、经世、创新	MOR0; SCH; MOR3; INNO	明德， 即光明之德。出自《大学》首句：大学之道，在明明德，在亲民，在止于至善。明德，寓意我校以立德树人为根本任务，注重师生思想政治教育和传统美德教育。同时勉励青年学子坚定理想信念，不怕困难，勇于开拓，为实现中华民族伟大复兴的中国梦而努力奋斗。 “博学”，语出《礼记》，《礼记·学记》篇有“博学而不穷，笃行而不倦”，其意思为热爱学习、学习领域广泛和学问渊博等。“致用”，寓意学校办学贴近和服务地方经济社会发展，着重培养具有实践能力的高素质应用型人才。“博学致用”强调的是学识修为的重要性，人不仅要有渊博的知识，还要学会应用，用所学知识造福社会。 “创新”，创新是人类特有的认识能力和实践能力，是推动民族进步和社会发展的不竭动力。一个民族要想走在时代前列，就一刻也不能没有创新思维，一刻也不能停止各种创新。寓意学校通过对学生创新精神和创新能力的培养，造就创新型人才。
132	Changzhi University	求真、求实、求善、求美	SCH; SCH; MOR1; WILL	长治学院所在的山西省长治市是太行精神的孕育地。长期以来，学校扎根这片红色土地，传承弘扬太行精神，赓续红色精神血脉，形成了“求真 求实 求善 求美”的校训，培养出了“七一勋章”获得者、“时代楷模”黄文秀等一大批扎根基层的杰出优秀人才。
133	Yuncheng University	立德有为	MOR0; ACT	前身为始建于1978年的运城师范专科学校。1989年12月，经国家教委批准，山西省人民政府决定，由运城师范专科学校、运城教育学院、河东大学三校合并组建运城高等专科学校。2002年2月经教育部正式批准成立运城学院。春风化雨、润物无声，建校以来始终秉承“立德有为”校训，大力弘扬自强不息、艰苦奋斗、精益求精、追求卓越的精神，为地方经济社会发展做出了重要贡献。
134	XinZhou Normal University	厚学启智，修德树人	SCH; SCH; MOR0; MOR2	“厚学”：崇尚知识，探求学问。教师要勤于钻研，厚积薄发;学生要勤奋学习，积累学识。倡导博采众长、兼容并蓄、融贯古今中西的学术追求。 “启智”：开启智慧，开发心智。充分发挥师生的主观能动性，培养良好的学习方法和创新能力，全面提升综合素质。 “修德”：彰明伦理，完善品德。兼具修养德行和提升素养之义，修德既是育人的根本，更是高等师范教育的价值追求。 “树人”：培养人才，造就栋梁。体现了学院培养中国特色社会主义合格建设者和可靠接班人的神圣使命。
135	Shanxi University of Finance and Economics	修德立信、博学求真	MOR0; MOR1; SCH; SCH	修德立信——修养品德，树立信用。即将人品道德修养和讲究诚实信用作为师生从教求学的首要目标和行为准则。 修德，言主体内在的素质、操行和境界，弘扬崇高思想情操和道德修养，继承优秀传统道德，兼容吸收人类道德文明，树立高尚道德。高校强调德、智、体全面发展，德是至关重要的，事关培养合格的建设者和接班人。因此，学校要把德育放在首位，坚持正确的教育方向，加强对广大师生员工的道德教育。故“修德”是做人的根本，也是我们必须践行的道德准则。 立信，意谓师生要有崇高的信仰和坚定的信念，真正做到信以立志、信以守身、信以处世、信以待人。培养新时代的人才，特别是经济类院校的大学生，其“诚信”品质尤为重要。立信，要求师生树立远大的理想与信仰；确立诚实守信，言行一致，表里如一的品德；对人以诚相见、对事以诚相待，说老实话、办老实事、做老实人，言必信、行必果。 博学求真——广博学习，追求真知。即为学须在理论知识和专业技能上…
136	Shanxi University of Chinese Medicine	厚德求真、守正创新	MOR0; SCH; MOR1; INNO	“厚德”，意在强调落实立德树人根本任务，以德治校，以德治教，以德治学。冀师生医护员工崇师德，尚医德，重学德，做新时代德智体美劳全面发展的社会主义合格建设者和可靠接班人。 “求真”，意为解放思想，崇尚科学，遵循规律，实事求是。冀师生医护员工孜孜不倦，求中医之真谛，求学术之真功，求为人之真诚，求为事之真实。 “守正”，意为坚守正道，弘扬正气。冀师生医护员工守中华文化之正，守岐黄精神之正，守中医药道路之正，坚定中医药自信，传承中医药精华。 “创新”，是时代的要求，也是中医药事业发展的必由之路。冀师生医护员工充分发挥中医药的独特优势和作用，为推进我校建设区域性、有特色、高水平中医药大学贡献智慧力量。
137	Lyuliang University	弘毅行知	MOR1; ACT; SCH	弘毅，强调厚德载物、自强不息；行知，强调知行合一、躬行践履。 “弘毅行知”是做人准则与做事准则的高度契合，体现了对全校师生员工立身处世、治学求知的总体要求，反映了学校“艰苦创业”的办学传统和实用性人才培养特点，含蕴丰厚，警策凝练。
138	Taiyuan University	博学弘毅，力行至善	SCH; MOR1; ACT; MOR1	博学：源自《·中庸》：“博学之，审问之，慎思之，明辨之，笃行之。”表明我院具有专业的多样性，意在倡导师生广泛学习，博采众长，追求广博的学识和渊博的学问。 弘毅：源自《论语·泰伯》：“士不可以不弘毅，任重而道远。”说明学院作为高等院校，担负着传承文明、培养人才、服务社会和科技创新的重大社会责任，倡导较高的价值追求，重视培养学生形成刚毅的性格和强烈的责任担当。 力行：源自朱熹《朱子语类》卷九：“致知力行，论其先后，固当以致知为先。然论其轻重，则当以力行为重。”指明我院应用型本科院校的特征，强调人才培养中社会实践的重要性和服务社会、成就人生的价值追求。 至善：源自《礼记·大学》：“大学之道，在明明德，在亲民，在止于至善。”倡导学院永争一流的创业精神，在人才培养中德智体美劳全面发展，激励师生追求卓越的人格。
139	Shanxi Police College	忠诚、正义、厚德、博学	MOR3; MOR1; MOR0; SCH	“忠诚” 辞海中对二字的解释为：尽心竭力，真心实意。早在春秋时期曾子就说过“为人谋而不忠乎”意思是为别人办事尽心竭力了吗？ 我国是社会主义大国，作为共和国预备警官。我们不但要做到对朋友、亲人忠诚，更要做到对国家忠诚，对党忠诚，对人民忠诚！这是校训对我们的要求。 “正义” 辞海中对二字的解释是为：公正的，公正的道理。《荀子-儒效》：有不学问，无正义，以富利为隆，是俗人者也。意思是：不学习，缺乏正义感，只求 财富兴隆，这是庸俗的人。 警察，这个圣神的职业，它是光明与正义的真实写照。校训正是时刻提醒我们在未来的岗位上要做到正义执法！ “厚德” 辞海中对厚德二字分别做了解释：厚：厚实。德：道德；品德。《周易》中指出：“地势坤，君子以厚德载物”它指一个人只有拥有大地般厚实的品德才可以承载万物。而厚德就是拥有大地般厚实的品德。做为山警的一员，我们应树立良好的道德品质，做到：廉洁、公正、守法、守纪。严…
140	Shanxi Vocational University of Engineering Science and Technology	厚德精技、励学笃行	MOR0; PROF; SCH; ACT	一是坚定理想信念，厚植爱国情怀。把个人理想追求融入党和国家事业之中，把爱国之情、强国之志转化为报国之行，让青春在祖国和人民最需要的地方绽放绚丽之花。二是锤炼品德修为，立志成长成才。把正确的道德认知、自觉的道德养成、积极的道德实践紧密结合起来，从百年党史中汲取力量，树立正确的世界观、价值观、人生观，做崇德向善的新时代好青年。三是练就过硬本领，技能强国报国。要大力弘扬劳模精神、劳动精神、工匠精神，走技能成才、技能报国之路，早日成为建设社会主义现代化国家的卓越工程师、大国工匠和能工巧匠。四是踔厉奋发追梦，笃行不怠赶考。坚定不移听党话、跟党走，在青春的赛道上，跑出当代青年的最好成绩，以实际行动迎接党的二十大胜利召开，在新的赶考路上不断创造新的历史伟业。【书记迎新致辞】
141	Shanxi College of Technology	笃行求真，日新致远	ACT; SCH; INNO; WILL	自建校以来，学校始终坚持应用型高校办学定位，恪守“笃行求真，日新致远”的校训，以立德树人为根本任务，构建“以学生为中心”的人才培养体系，培养“厚基础、强实践、勇创新”具有较强学习力、思辨力和行动力的高素质应用型人才。 2023校训征集公告： 为进一步加强校园文化建设，塑造良好学校形象，体现全体师生的共同理想、价值追求和精神风貌，在学校建校两周年校庆即将来临之际，特面向校内外公开征集符合我校特色的校歌、校训。 征集要求： 1.立足学校特色和发展目标，充分体现学校办学特色、精神风貌、文化底蕴。 2.言简意赅、清新高雅，立意高远、便于铭记（原则上不超过8个字）。 3.以word文档形式撰写校训，并附相应释义及说明，如有典籍出处请注明。
142	Shanxi Institute of Science and Technology	崇德明理、精工求真	MOR0; MOR1; PROF; SCH	学校秉承“崇德明理 精工求真”的校训，坚持开放办学、文化引领、实践导向、协同育人的办学理念，扎根晋城、服务山西、面向中原、辐射全国的办学方向，以工为主、理工结合、学科交叉、集群发展的办学定位，紧扣应用型大学建设目标，“七航工程”赋能展翼、绘梦扬帆，“七力提升行动”聚势谋远、拓展新程，向建设特色鲜明、优势突出、声誉良好的应用型本科高校不断迈进。
143	Taiyuan Institute of Technology	知行合一、行胜于言	ACT; ACT	知与行，是中国古老的热点文化命题，对中华文明的形成和发展起了重要作用。知，即知识、理论、思想等；行，即行动、贯彻、实践等。知行合一，即思想要和实践互相统一、协调一致、知行相长，共同发挥作用。行胜于言，即知识、理论、思想等形成以后，要通过实干苦干、重在执行，转化为目标成果。 从先秦到当代，哲学家对知与行的先后、轻重、难易等各有辩难，形成了不同流派。作为主要流派的儒学思想认为：“君子学以致其道”（语出《论语》），“知之不若行之”（语出《荀子》）“知之愈明，则行之愈笃；行之愈笃，则知之益明”（语出《朱子语类》）。近代教育家陶行知认为，“知者行之始，行者知之成。”当代伟人毛泽东认为，“通过实践而发现真理，又通过实践而证实真理和发展真理。”（语出《实践论》）综之，知行要结合统一、互契互进，经世致用、行胜于言。 太原工业学院在1954年创立以后，即以培养人才、研发科技、服务社会为己任。在近60年的曲…
144	Communication University of Shanxi	厚德博识、励学躬行	MOR0; SCH; SCH; ACT	“厚德”，见于《周易》“地势坤，君子以厚德载物”、《国语》“厚德之以示之信”等典籍。 “博识”，见于《子华子》“明睿以博识，晋国之隽老也”、岳飞之孙岳珂《愧郯录》“折衷古今，以俟博识”等典籍。 “励学”，见于西晋虞溥《厉学》、宋真宗《励学篇》等典籍，著名的格言“书中自有千钟粟”即源于此。 “躬行”，见于《论语》“躬行君子，则吾未之有得”、陆游“纸上得来终觉浅，绝知此事要躬行”等。
145	Shanxi Institute of Technology	崇德尚能,行知合一	MOR0; PROF; ACT	“崇德”，就是崇尚和发扬完美的道德品性，出自《论语·颜渊第十二》：“主忠信，徙义，崇德也。” “尚能”，要求教职工爱岗敬业，具有较高的教学、科研及服务能力；要求学生努力提高知识应用、专业技术、继续学习、创新创业、适应社会等多方面能力。 “行知合一”，就是理论联系实际，用理论指导实践，用实践来检验理论，培养理论与实践相结合的人才，反映了与时俱进、科学发展的时代精神。 学院秉承“崇德尚能、行知合一”的校训，以“太行精神”培根铸魂，以“工匠精神”启智润心，形成了“涅石传承、匠心筑梦”的办学特色。坚持立足行业、服务社会、强化应用、突出实践，坚持OBE教育理念，培养服务区域经济社会发展和行业需要、具有社会责任感、创新精神和实践能力的德智体美劳全面发展的新时代应用型人才。
146	Shanxi Institute of Energy	立德强能、笃学善行	MOR0; PROF; SCH; ACT	立德强能、笃学善行，是山西能源学院办学理念和价值追求有关核心内容的凝练表达。 立德，树立德业——学校把立德树人作为根本任务，把德育放在人才培养首要位置，着力培养堪当民族复兴重任的时代新人。 强能，提升能力——学校作为应用型高校，高度重视学生专业技能和实践动手能力的培养。还蕴含着学校作为行业性院校，办学宗旨是为了服务和促进能源行业产业的强盛蓬勃地发展。 笃学，专心好学——期望全校师生勤勉认真、专心致志的学习和研究，共同营造良好的学术和学习氛围。 善行，善于行动——强调要学以致用、善于实践，积极运用所学知识去认识世界和改造世界，并能够取得良好效果。
147	Inner Mongolia University	求真务实	SCH;ACT	内蒙古大学校训“求真务实”是新中国培养的第一个蒙古族院士、现任中国工程院副院长旭日干提出并坚持的。他说，每一所大学的诞生都有其特定的历史背景和精神寄托，是教风、学风、校风的集中体现，更是一所大学成长经历的精神凝结。 “求真务实”是知与行哲学理念的通俗表达，是解放思想、实事求是、与时俱进、追求真理、贵在实践的高度概括。内蒙古大学“求真务实”校训的明确提出，最初是在1993年。时任校长旭日干将“求真务实，真抓实干”作为行事准则，并经常以此激励广大师生。内蒙古大学于2001年底在全校广泛开展征集校训、校歌的文化建设活动。在征集到的意见中，“真”与“实”两个字出现的频率最高，文化建设工作组的专家学者建议按照收集到的意见将“求真务实”凝练为校训，在党政联席会议上讨论通过，内蒙古大学校训正式以文字形式明确确定。
148	Inner Mongolia University of Science & Technology	百炼成钢	WILL	出自汉·陈琳《武军赋》：“铠则东胡阙巩，百炼精刚。”指该校师生不怕失败；经过长期刻苦的锻炼；意志才能坚强。
149	Inner Mongolia University of Technology	博学躬行,尚志明德	SCH; ACT; WILL; MOR0	“博学”出自《论语》：“博学而笃志，切问而近思”。“博学”既指为学首先要广博地获取知识，培养充沛而旺盛的好奇心，也指学问渊博，是求学、治学的目标。 校训选取“博学”一词，体现着学校重视为学渊博与创新，倡导用新的思想观念和思维方式，不断追求新知，勇于探索真理。在专业、学科等方面都应具有“博”的特点，在学术思想、学术风格、学术观点上应兼容并蓄、百花争艳。作为教师，应学识渊博、造诣精深；作为学生，应打下厚实的功底，全面提升综合素质。 “躬行”出自《论语·述而》：子曰：“文，莫吾犹人也。躬行君子，则吾未之有得。” “躬行”指亲身实践。倡导做任何事情都要身体力行，亲力亲为，要有追求真理、创新探索的精神。 “躬行”二字的表层意义是说，做事要踏实、谦虚、亲为、勤勉，要弯下身子好好做事情；其深层意义是说，书本和别人给你的间接知识和经验，即使再丰富也不能代替亲身的实践经历。 “尚志”出自《孟子·尽心上》：…
150	Inner Mongolia Agricultural University	团结、求实、博学、创新	MOR2; ACT; SCH; INNO	内蒙古农业大学的前身内蒙古农牧学院是我区高校中第一所制定大学校训的高校。1987年，正值学校建校35年之际，学校确定了“团结、求实、勤学、献身”的校训。时任院长乌尼对校训的诠释是：团结，理解为为了共同的理想或完成共同的任务而结合或联合。求实，就是讲究实际，一切从实际出发，按客观事物的发展规律办事。勤学，就是勤奋学习。献身，即把自己的全部精力以及生命献给祖国、人民和所热爱的事业。1999年，内蒙古农牧学院与内蒙古林学院合并组建内蒙古农业大学，结合林学院“团结、求实、博学、奋进”的校训，内蒙古农业大学形成新的校训“团结、求实、博学、创新”。
151	Inner Mongolia Medical University	博学、尚行、精诚、至善	SCH; ACT; MOR1; MOR1	校训据《辞海》解释,其含义是“学校为训育上之便利,选若干德目制成匾额，悬之校中公见之地”，“目的在使个人随时注意而实践之”。从字面上看，校训是学校为树立优良校风、培养良好学风而制定的,要求师生共同遵守的基本的思想规范和行为准则。简言之,就是学校着意建树的“应然之风”,即特有精神和价值取向。校训是校园文化的一项重要内容,是一所学校个性特色和传统的表露，也是一种方向性育人手段和管理措施。 学校的校训为“博学、尚行、精诚、至善”。 博学:博，宽广、广博。博学即广泛学习涉猎,要宽口径、厚基础,以期学问学术渊博。 尚行:尚,尊崇、崇尚、尊重。行,行为、规律。《史记·项羽本记》:“大行不顾细谨。”《荀子·天论》:“天行有常。”贾谊《陈政事疏》:“世之有饥镶,天之行也。”尚行,即医学要崇尚实践行为,尊重客观规律。 精诚:至诚,真心诚意。《庄子·渔父》:“真者,精诚之至也,不精不诚,不能动人。”《后汉书…
152	Inner Mongolia Normal University	献身、求实、团结、奋进	MOR3; ACT; MOR2; WILL	校训是广大师生共同遵守的基本行为准则与道德规范 , 它体现了大学文化精神的核心内容。内蒙古师范大学在建设和发展过程中形成了“献身、求实、团结、奋进”的校训。这短短的八个字，不仅是内蒙古师范大学办学理念、育人方向、人文追求的高度概括，也是学校精神和办学特色的集中体现，更是全校师生的理想追求与精神支柱。 献身， 把自己的全部精力和生命献给祖国、人民或事业。 求实： 讲求实际;客观地或冷静地观察以求得对客观实际的正确认识求实精神。 团结，是由多种情感聚集在一起而产生的一种精神。 奋进：“奋”者，振作而鼓劲，“进”者，不停步，不停顿，勇往直前。
153	Inner Mongolia Minzu University	博学明理、崇德至善	SCH; MOR1; MOR0; MOR1	“博学明理凌云志，崇德至善赤子情。” 博学：“博”，大通也。即宽广、广博之谓。现代综合性大学，在专业、学科等方面都应具有“博”的特点，在学术思想、学术风格、学术观点上应兼容并包、百花争艳；作为教师，应学识渊博、造诣精深；作为学生，应打下厚实的功底，全面提升综合素质。明理即通情达理。
154	Chifeng University	经世致用、立己达人	MOR3; ACT; MOR1; MOR2	经世，语出 《庄子》“春秋经世，先王之志”，经世即“经国济世”，强调要有理想抱负、志存高远、胸怀天下、求索治世之道；致用，语出《周易》“精义入神，以致用也”，致用即“学用结合”，强调要有不务虚学、知行合一、积极入世、报效国家之志。立己达人，语出《论语•雍也》“夫仁者，己欲立而立人，已欲达而达人”。立己即自律自强，强调要有笃学求是、崇德向善、明理修身、勤苦自立之心；达人即尽责尽心，强调要有心存仁爱、敢于担当、推己及人、兼济天下之责。校训中，“经世”强调了履行大学服务社会的责任与使命；“致用”突出了应用型人才培养的特征与目标；“立己”着眼于增强自我修养；“达人”侧重于个人的社会责任感，四者紧密相连、辩证 -统一。“经世致用”体现了应用型综合大学的定位高度，“立己达人”彰显了立德树人的丰富内涵以此作校训，就是倡导全校师生具有家国天下的情怀和担当，把远大的理想抱负和锲而不舍的努力结合起来，既志存…
155	Inner Mongolia University of Finance and Economics	崇德、尚学、明理、包容	MOR0; SCH; MOR1; INCL	崇德：“崇”是重视、推崇之意；“德”,是道德、品行,“崇德”主张人要推崇高尚的品格,这是为人之本，体现了“育人为本、德育为先”的办学指导思想。 尚学：“尚”为尊崇、注重之意，“学”指学问、知识、学说、学术、学习，“尚学”主张人应热爱和注重学习，尊重知识、尊重规律、追求真理、探索未知、陶冶情操、传承文明，倡导终身学习，也体现重视教授治学的治理理念。 “崇德”“尚学”反映了中国传统教育思想，体现了学校办学坚持党的教育方针的基本态度和以学生为本的办学理念，是世界观和方法论相统一的哲学概括。 明理：明，有明确、懂得、纯粹、使…发扬，使…昌盛等义；理，指事物的层次、结构、秩序、道理、规律。宋书·《良吏传·徐豁》“历二丞三邑，精练明理，为一世所推”指明白是非、明察事理、懂道理。 包容：语出《汉书·五行志下》“上不宽大包容臣下，则不能居圣位”，指宽容大度、容纳。包容无处不在、必不可少。包容是学问、是艺…
156	Hulunbuir University	明德致和、笃学尚行	MOR0; INCL; SCH; ACT	明德：语出《礼记·大学》“大学之道，在明明德”，即大的学问，在于弘扬大的德行。德育为教育之灵魂，“明德”二字强调德育为先，以德立学，以德立身，以德立行。凸显知识之道，重在人文，为人之道，重在人品。 致和：语出唐·严维《奉和皇甫大夫祈雨应时雨降》“致和知必感，岁旱未书灾”，谓人事极其和顺。我校历史上经历了八校合一，多民族集聚，在发展过程中，形成了融合、包容、和谐、团结的精神，这是学校发展的根本。 笃学：语出《论语•泰伯》中有“君子笃于亲，则民兴于仁。”笃，有笃实、笃厚、真诚之义。笃学，勤学。强调要以求真务实的态度做学问，倡导师生袪除浮躁之气，杜绝急功近利的思想，坚定踏实、专心致志地追求知识、追求真理。 尚行：语出北宋易学家邵雍《皇极经世书•观物篇》“尚行，则笃实之风行焉。”强调不但要在认识上有所提高，而且要身体力行。要尊崇实践，脚踏实地，学用结合。 校训“明德致和笃学尚行”，既传承了我国优…
157	JiNing Normal University	求实创新、为人师表	ACT; INNO; PROF	建校以来，学校立足边疆民族地区，践行“求实创新、为人师表”的校训，始终不渝为边疆民族地区基础教育、经济建设和社会发展服务，培养了九万多名“下得去、留得住、用得上、干得好”的各类人才，为国家、自治区特别是乌兰察布市的经济社会发展、民族团结进步和边疆和谐稳定做出了重要贡献，被誉为乌兰察布基础教育、民族教育的摇篮和城市智慧的心脏。
158	Hetao college	仰望星空、脚踏实地	WILL; ACT	33年来，河套学院秉承“仰望星空，脚踏实地”的校训精神与“艰苦创业，自强不息，奋发有为，敢为人先”的办学传统，逐步形成了“立足西部，面向全区，培养高素质应用型人才的多科性大学”的办学定位。
159	Hohhot Minzu College	传承、崇正、尚智、务本	INNO; MOR1; SCH; ACT	1、崇正:就崇的字形而言,从山,宗声,山表示意义, 宗表示声音,意思是指山高,成语有崇山峻岭。由此引申指 高尚的人,被推崇的人。崇的另外一层意思是重视、尊敬、 推崇。正的意思为正直、正当、改正。崇正即为崇尚正义, 讲诚信,修身明德。 2、尚智:“尚智”源于孔子的“尚智”思想。出自其《论 语·阳货》,意为“崇尚聪智”。孔子的“重教重学”提倡 通过外在教化和内在学习让人获得科学知识,改变愚昧思想, 达到“聪智”境界。这种“尚智”也就是尊重知识、崇尚科 3、务本:即致力于根本。有脚踏实地之意。 (1)《论语·学而》:“君子务本,本立而道生。孝弟也 者,其为仁之本与?”《礼记·学记》:“三王之祭川也, 皆先河而后海,或源也,或委也,此之谓务本。”元 关汉 卿《裴度还带》第四折:“习诗书,学礼易,从先进君子务 本。忘食发愤,能正其身。” (2)务本一词也曾出现在《成吉思汗圣言》:“修德尚智, 务本…
160	Inner Mongolia Arts University	德高艺美,智圆行方	MOR0; PROF; SCH; ACT	学校以“彰显特色、强化优势、多元互动、和谐发展”为办学理念，以“德高艺美，智圆行方”为校训，以建设有特色高水平应用型艺术学院为目标，已初步形成全方位、多层次的办学体制，现已成为一所特色鲜明、办学水平较高的综合性高等艺术学府。
161	Ordos Insititute of Technology	知行合一、笃学致用	ACT; SCH; ACT	党委书记、校长李向东强调，热爱学校才能凝聚校园青春之力。作为鄂尔多斯地区唯一的一所本科院校，我校具有年纪“轻”、景色“美”、规模“小”、发展“快”、活力“足”的特点。希望同学们能够秉承“知行合一、笃学致用”的校训，多点包容、少点抱怨，多点建议、少点吐槽，多点支持、少点拆台，成为奋力拼搏、勇于创新、活力十足、乐于奉献、追求卓越的”鄂小鹰，把我校建设成为特色鲜明的区域性高水平应用型本科院校。【书记校长第一课】
162	Liaoning University	明德精学、笃行致强	MOR0; SCH; ACT; WILL	明德精学：主体内在的素质、操行和境界；弘扬光大崇高思想情操和道德修养，精晓学业，传承民族文化之优长，兼容世界优秀文化，树优良学风、校风。 笃行致强：主体的行动、追求和目标；追求真知和理想，潜心探索、身体力行，跻身强校之列，实现强国之梦，使伟岸中华以文明进步之强势自立于世界民族之林。
163	Dalian University of Technology	团结、进取、求实、创新	MOR2; WILL; ACT; INNO	团结是要求有合作和团队的意识，不以小我为中心；进取是要努力上进，力图有所作为;求实是坚持实事求是的原则，探寻真理，追求真知;创新是勇于开拓，不断追求更高的境界，在传承中继承和发扬光大。
164	Shenyang University of Technology	自强、笃行	WILL; ACT	“自强”、“笃行”，均出自古语经典，不仅具有丰厚的中国传统文化底蕴，同时也具有浓厚的当今社会时代气息，更为社会主义核心价值体系的构建与和谐校园建设赋予了新的内容。 1.“自强” “自强”，语出《易·乾》：“天行健，君子以自强不息。”《礼记·学记》：“知困，然后能自强也。”《宋史·董槐传》：“外有敌国，则其计先自强。自强者，人畏我，我不畏人。”老子《道德经》：“知人者智，自知者明；胜人者有力，自胜者强。” “自强”，要求我们每个人都应该自尊自重，不断地自力图强，奋发向上；要求我们每个人都应该自强自立，始终如一，勇往直前；要求我们每个人都应该努力战胜自己，追求上进，做时代的强者。 “自强”，也是我们中华民族的传统美德，是我们中华民族精神的真实写照，是我们中华民族前进的不竭动力。 “自强”，更是我们沈阳工业大学精神的写照。昨天，我们沈阳工业大学凭借自强不息的精神得到了快速发展，跻身于辽宁强校之…
165	Shenyang Aerospace University	德能并进，勇毅翔远	MOR0; PROF; MOR1; DIL; WILL	德能并进，勇毅翔远”的校训昭示着沈航人用办学实践反复验证的基本理念—“只有造就有道德、有能力、有勇气、有毅力的高素质人才，才能适应祖国未来发展的需要”。 学校秉承“立足航空，明德育人，求实拓新，志在卓越”的办学宗旨，发扬“德能并进，勇毅翔远”的校训精神，继承优良的办学传统，树立踏实严谨的学术风气，倡导开放自由的学术氛围，激发理实交融的学术创新，围绕牢固确立“立足航空、拓展航天，做大民航、做强通航”的“四航”发展格局，筑牢“通航”特色。
166	Shenyang Ligong University	弘志励学,德才并蓄	WILL; SCH; MOR0; SCH	新时期，学校将围绕立德树人根本任务，实施“特色立校、人才强校、开放兴校、文化治校、质量固校”五大发展方略，践行“爱国奉献、自强不息、求真务实、追求卓越”的兵工精神，秉承“弘志励学，德才并蓄”的校训，不断深化教育教学改革，强化内涵发展，提高教育质量，为把学校建设成特色鲜明的高水平应用型大学而不懈奋斗。
167	Northeastern University	自强不息、知行合一	WILL; ACT	张作霖于1923年东北大学。第一任校长王永江在首届学生开学典礼上，针对当时年轻人浮华之气日盛的情况，力诫他们不存虚浮侥幸心理，对学业实事求是，少说话、多做事，因此题写“知行合一”四字校训勉励青年学子。 1928年8月，张学良兼任东北大学第三任校长，并捐献出其父留下的大部分遗产用于兴办东北大学以及一部分中小学。他在东北大学对学生的讲话中说：“我很希望诸君，要坚定了志向，各用自己之所学，全国学者都能如此，则中国自强矣。”自此，“自强不息、知行合一”便成为东北大学师生薪火相传的精神信念与人生理想。 “惟知行合一方为贵，惟自强不息方登高。”东北大学的校歌也反映了“自强不息、知行合一”的校训精神和文化。 “自强不息、知行合一”出自中国传统典籍。“自强不息”源于《易经》中乾卦的象传，其词云：“天行健，君子以自强不息。”它反映了“生生不息，刚健有为”的人生态度，其原意是天总是刚劲强健而运行不止，君子观…
168	University of Science and Technology Liaoning	博学明德 经世致用	SCH; MOR0; MOR3; ACT	七十多年的办学历程，学校形成了自己的办学特色和教育风格，形成了自己的校园文化传统。辽宁科技大学是以工为主的多科性大学，培养出的学生在做人上以诚实、朴实、踏实、务实著称，在业务上以应用型、技术型、工程型、实践型见长，这就是经世致用的基本体现 在人才培养过程中，学校贯彻素质教育方针，特别强调学生要德才兼备，要科技素质和人文素质兼备，这是学校坚持的人才培养标准，也是学校之所以形成的自己特色的基本理念。 博学明德，经世致用，把育人中的做人做事做学问统一起来，统一于服务社会，统一于服务民生，既体现了学校的办学宗旨，又言简意赅，寓意深刻，体现出学校的文化底蕴和精神风貌。 博学明德，是古代先贤的治学名训；经世致用，是近代学者的务实作风，两者互相照应、互相补充，比较全面地把握了做人、做事、做学问三者间的关系，以“博学明德，经世致用”为校训，既传承了中华文化，又突出了辽宁科技大学的文化内涵；既体现了时代精…
169	Liaoning Technical University	诚朴求是，博学笃行	MOR1; SCH; SCH; ACT	校训是一种无形的力量，对于造就和培养学者和学人有不可估量的重要作用。七十多年来，辽宁工程技术大学历经沧桑，风雨兼程，校名几经更易，但学校诚实朴素的优良传统和严谨求是的治学精神在一代又一代辽宁工大人身上传承延续，并不断发扬光大，历久弥新。正是这种优良的传统和精神，将辽宁工程技术大学深深植根于中国和世界文明的沃土中，形成了辽宁工大深厚的文化底蕴，塑造了辽宁工大人诚恳朴实、坚毅自强的品格，使学校在七十多年的办学过程中始终保持青春活力，各项事业蓬勃发展，在人才培养、科学研究、社会服务、文化传承创新、国际交流合作等方面都取得了令人瞩目的成就，为我国高等教育事业的发展作出了应有的贡献！ “诚朴求是博学笃行”八字校训，不仅言简意赅，而且寓意深刻，富有哲理。既反映了我校的优良传统与特色，又能体现学校办学的理想追求与实现途径。八字校训既各自独立成意，各有侧重，又相互联系，浑然一体，涵盖了品格修养、教育思想…
170	LiaoNing Petrochemical University	问学穿石、修身诚化	SCH; MOR1	“问学”出于《中庸》27章：“故君子尊德性而道问学，致广大而尽精微。”是追求知识，勤勉学问的意思； “穿石”来源于“滴水穿石”的典故。表示求学过程中有顽强的毅力和坚韧不拔的精神； “修身”见于《周易 复卦》，儒家经典《大学》有“诚意、正心、修身、齐家、治国、平天下”的说法。修身是知识分子修炼品格，涵养德性的必由之路； “诚化”出于《中庸》23章：“唯天下至诚为能化。” “诚”代表忠诚、真诚、诚信，是修身的根本；“化”是人的知识与品格和谐统一的最高境界，是修身的目标。由“诚”到“化”，是一个提升的过程，只有做到“诚”，才能达到“化”。 由这八个字组成校训，概括“问学”和“修身”两个方面，是知识分子成才和立身的必修课。要求师生追求学识要有恒心和毅力，矢志不移；修炼品格要立身以诚，追求化境。 另外，这则校训嵌入了“石化”二字，体现了学校的专业特色。
171	Shenyang University of Chemical Technology	强学力行、喻理求真	SCH; ACT	“强学力行，喻理求真”的校训精神形成于我校半个多世纪的发展历程之中，集中体现了我校的治学理念。 强（音qiǎng）：意为硬要，迫使；力：意为努力，尽力；喻：意为启发，开导，告知；理：此处意为理性，知性，即指思维活动能力或求知的能力。“强学力行”出自唐韩愈《后十九日复上宰相书》：“愈之强学力行有年矣”，后加上“喻理求真”句，其涵义为：通过强学力行达到喻理求真的境界。简言之，即“勤奋学习，努力实践，开发理智，探求真理”。 “强学力行，喻理求真”八个字，为中国社会学和人类学的奠基人之一费孝通亲笔所提。
172	Dalian Jiaotong University	明德求索、锲而不舍	MOR0; WILL; DIL	明德：对学校而言，德为育人之本；对学子而言，德为成人之本。治校之明德，既要法治，更要德治。教师之明德，是学高为师，德高为范。员工之明德，在于敬业爱岗、服务育人。学生之明德，在于懂得成才必先成人，成为一个大写的人、舒展的人、博雅的人、睿智的人、和谐发展的人、充满创造精神的人。 求索：表达了学校不论经历多少艰难，仍要坚持不懈地探求真理。求索的精神，是大学的精神。用求索的精神培养勇于求索的人，是大学的责任。求索的精神是科学的精神，它包含了求实精神和创新精神。 锲而不舍：指的是一种坚持不懈的精神。它既是治学的精神，也是做人的精神，是今天中国学界必具的为人之道和为文之道。 “明德求索 锲而不舍”作为我校新时期的校训，涵义深刻、隽永、耐人寻味，振奋精神，具有浓郁民族传统文化底蕴。几十年来，我校从中专到学院到大学，一步一个台阶，一步一个脚印，就是体现了这种精神。困难时，它给人以毅力；犹豫时，它给人信心…
173	Dalian Maritime University	学汇百川、德济四海	SCH; MOR0	“学汇百川”出自东汉王充《论衡·别通篇》“人含百家之言，犹海怀百川之流也”，指学校师生具有大海般的胸襟，虚怀若谷；学校倡导百花齐放、百家争鸣，善于会聚八方英才，汲取人类文化的一切优秀成果。“德济四海”系化用《周易·系辞上》“知周乎万物而道济天下”中的“道济天下”，意指学校师生以德为本，具有高尚的道德品质和人格；德才兼备，具有服务社会、经邦济世、造福人类的志向、责任和能力。
174	Dalian Polytechnic University	博学精思,笃行致新	SCH; REAS; ACT; INNO	“博学精思”，意即做学问者要博采众长，集思广益，缜密思考，精益求精。“博学”，意思是说君子要掌握广博知识，并用礼仪规范自己的言行，方能不悖做人之道。“精思”，就要一丝不苟，就要刨根问底，就要穷追不舍。“学而不思则罔，思而不学则殆。”学是思的基础，思是学的深化。所以要善于思考，从人类知识宝库中取其精华、去其糟粕，判美析理，求真弃假。 “笃行致新”，意即学以致用，勇于实践，不断创新，努力达到最好。“笃行”就是要身体力行，择善而行，踏实前行。就是强调实践，做到言行一致，知行合一。“致新”就是追求更新、更高的境界。“致新”是“笃行”的升华，是“博学精思”付诸于实践的最高境界。”
175	Shenyang Jianzhu University	博学善建、厚德大成	SCH; PROF; MOR0; WILL	博学善建、厚德大成。博学善建，即：沈阳建筑大学的师生应当博学多才，在治学上不仅要专，而且要博，广泛地涉猎各方面的知识和文化。只有博学，才能技艺精深，才能有博大而宽阔的胸怀，才能献身于建设事业；善于创建完美，善于完善自我，才能更好地为国家建功立业。厚德大成，即是在博学的基础上，沈阳建筑大学的师生更要加强自身的思想道德修养，成为品德高尚的人才，志存高远，厚道宽容，虚怀若谷。只有做到德才兼备，才能达到最完美的境界，才能在人生舞台上施展自己的远大抱负，成为集大成者，成就大业。沈阳建筑大学一直秉承“博学善建、厚德大成”的校训，坚持面向地方经济建设和国家建设行业，致力于培养具有良好思想道德品质、创新精神和实际能力的高级应用型人才。
176	Liaoning University of Technology	砺器悟道	DIL; SCH	“砺器悟道”的直接含义：在“器”的磨砺中领会“道”的深远。 “砺”：一意为磨刀石，见《荀子•劝学》“金就砺则利”；一意为磨，见《尚书•费誓》“砺乃锋刃”。 “器”：器皿、工具。 “悟”：领会、理解、觉醒。 “道”：一意为宇宙万物的本原，见《老子》“有物混成，先天地生，可以为天下母，吾不知其名，字之曰道”；一意为人生观、世界观，见《论语•公冶长》“道不行，乘桴浮于海”。深入理解“砺器悟道”的含义，需要在“器”与“道”的辩证联系中把握以下三个方面的关系： 一、“制器”与“砺器”的关系 “制器”即制造工具，狭义地讲，工学院就是研究和传授制造工具的知识与技能的高等学校。但是，同样是工具的制造，方法目的不同，精神状态不同，其结果就会大不相同，而“砺器”指的是高水准的工具制造。 可以从两个方面来解说“砺器”：其一，“砺器”体现着坚韧不拔、百折不挠、持之以恒的刻苦精神，不为挫折而泄气，不被困难所吓倒，…
177	Shenyang Agricultural University	团结、勤奋、求实、创新	MOR2; DIL; ACT; INNO	团结、勤奋、求实、创新的校训集中体现了沈农人脚踏实地、勤奋求学的求实精神，勇攀高峰、敢为人先的创新精神和学农爱农、将论文写在大地上的情怀。沈阳农业大学校训作为一种永久的精神力量，鼓舞一代代沈农人扎根农业、奉献农业，为国家发展、民族富强奉献青春力量。
178	Dalian Ocean University	海纳百川、行稳致远	INCL; ACT; WILL	海纳百川有容乃大 就是说要豁达大度、胸怀宽阔，这也是一个人有修养的表现。人们都把那些具有像大海一样广泛胸怀的人看做是可敬的人。出处：晋·袁宏《三国名臣序赞》：“形器不存，方寸海纳。”李周翰注：“方寸之心，如海之纳百川也，言其包含广也。” 学校传承发扬“水的精神”，凝聚形成了以“一训三风”为代表的大学文化，即“海纳百川、行稳致远”的校训和“自强进取、开放包容”的校风、“厚德博学、为人师表”的教风、“明德尚学、志存高远”的学风。学校不断深化“红·绿·蓝”人才培养理念，坚持用社会主义核心价值观铸魂育人。
179	China Medical University	政治坚定、技术优良	PROF; PROF	政治坚定，技术优良是1931年建校之初，毛泽东主席为我校制定的办学方针，现为学校校训。 中国医科大学前身为1931年创建于江西瑞金的中国工农红军军医学校。1932年学校更名为中国工农红军卫生学校。1940年在延安，经毛泽东同志提议正式更名为中国医科大学。1948年在沈阳接收原国立沈阳医学院（前身为满洲医科大学，1911年由日本国南满铁道株式会社建立），1949年接管合并原私立辽宁医学院（前身为盛京施医院医学堂，1883年由英国基督教联合长老会派遣的医学传教士建立）。学校是原国家卫生部部属高等医学院校，2000年划转为辽宁省人民政府管理，2015年获批为辽宁省人民政府、国家卫生和计划生育委员会、教育部共建高校。 中国医科大学是中国共产党最早创建的医学院校，是唯一以学校名义参加红军二万五千里长征并走完全程且坚持办学的院校，也是我国最早进行西医学院式教育的医学高等学校之一。在党的领导下，中国医…
180	Jinzhou Medical University	厚德修身、精术济世	MOR0; MOR1; PROF; MOR3	厚德修身，是说应不断培育和养成高尚的品德，《周易》中说：“地势坤，君子以厚德载物”。学校应以德育人，以德为先，以德为本，培育有德之人，所有师生员工都要以高尚的品德不断改造、砥砺和培养自己，使自己成为一个高尚的人。 精术济世，这句体现了医学的特点，古语云：医术乃仁术；古代也有“悬壶济世”的医学典故，所以行医也被称为济世，这句话是说学习上要不断精益求精，以高超的医术去服务民众。今天我校已发展成以医学为主的多科性大学，而“术”具有包容性，乃可以泛指技术、艺术等，而覆盖其它专业。 这两句话里的第一个字“厚”和“精”，都反映了主动进取精神。“厚”是不断积累和培养；“精”是精益求精，不断学习、锤炼和发展。“德”与“术”则涵盖了对师生员工要求的最根本的东西，也是一个人立足社会、服务人民之根本。
181	Dalian Medical University	甚解、敏行、明仁、济世	DIL; ACT; MOR1; MOR3	甚解：“健康所系，性命相托”，医学是个严谨的学科，来不得半点马虎，在教学、科研、医疗与学习活动中要一丝不苟，求真、求精，求甚解。 敏行：敏即敏捷，行即实践。实践出真知，医学是一个实践性很强的学科，而大医又以动手能力强为传统，因此要努力探索，勇于实践，敢于创新，更好地继承发扬这一优良传统。 明仁：医学伦理的体现，医者仁心，医术乃仁术。医学院校的师生必须有一颗仁爱之心，这是医学院校师生应具有的操守。 济世：取自悬壶济世。医者之使命即除人类之病痛，助健康之完美。 甚解 敏行 明仁 济世，充分地体现了我校的培养目标，就是让师生在知识上完善自己，在行为上规范自己，在道德上约束自己，更好地实现知、行、德的统一。
182	Liaoning University Of Traditional Chinese Medicine	厚德博学、继承创新	MOR0; SCH; INNO	“厚德”语出《周易》，意为“天行健，君子以自强不息。地势坤，君子以厚德载物”，意在鞭策师生作为中医药事业的继承人要像大地一样的厚重广阔而承载万物。 “博学”语出《礼记·中庸》，意为“博学之，审问之，慎思之，明辨之，笃行之”，此为学习的五个阶段，首要的是“博学”。 “继承”意味着继承先人之经验。中医万物讲“阴阳”，若“继承”为阴，那“创新”就为阳。所谓“阴阳护根”，“继承”与“创新”也是相互依存，相互渗透的。有继承就有创新，继承是创新的基础，创新是继承的发展。中医药文化历史悠久，我们不仅要继承先人的智慧经验，还要在已有的知识基础上进一步发扬21世纪的创新精神，创造我们这一代的智慧，展现我们的风采。 《国务院关于促进中医药传承创新发展的意见》提出：“传承精华，守正创新”，正确处理传承与创新的辩证关系，关系到中医药的前途和命运。传承精华，就是要让中医药发展源远流长；守正创新，就是要让中医药发展…
183	Shenyang Pharmaceutical University	团结,勤奋,求实,创新	MOR2; DIL; ACT; INNO	新时期，沈阳药科大学以习近平新时代中国特色社会主义思想为指导，制定了面向大健康领域，加快建设药学教育领域国际知名、国内一流的研究教学型大学发展目标，明确了以教育教学为中心，以人才培养、科学研究、服务社会、国际交流合作为职能，以“坚忍不拔、药济天下”沈药精神、“团结、勤奋、求实、创新”校训精神及红色基因、红色传统为文化传承，开创学校发展建设的新局面，为东北地区经济和社会发展、为我国高等教育事业发展、为实现中华民族伟大复兴的中国梦做出更大贡献。
184	Shenyang Medical College	博学洁行、厚德济世	SCH; ACT; MOR0; MOR3	校训，是一所大学办学思想、人才目标、人文内涵与学校精神的结晶和积淀，是对学校办学宗旨、教学理念和大学精神的集中概括和体现，是对学校文化核心内容的最好诠释，是对一所大学传统和特色的最好反映。校训，是师生员工砥砺人格的精神向导，更是师生员工不懈奋斗的人生航标。校训，对于学校内聚人心、外树形象、永葆活力具有不可替代的作用，对于激励师生员工弘扬传统、开拓创新、奋发向上具有特别重要的意义。 沈阳医学院的院训是“博学洁行、厚德济世”。 “博学”：出自《论语》，“博学而笃志，切问而近思，仁在其中矣。”《中庸》也有“博学之，审问之，慎思之，明辨之，笃行之”的论述，意思说学习是自我修养的第一步。“博”意味着博大宽容，用来勉励广大师生要努力拓宽知识视野、积淀深厚的文化底蕴、掌握精深的专业技能，惜时如金，发奋钻研。 “洁行”：语出《史记·伯夷列传》，“若伯夷、叔齐，可谓善人者非邪？积仁洁行，如此而饿死。”《史…
185	Liaoning Normal University	厚德博学、为人师表	MOR0; SCH; PROF	厚德与博学源于古训。“厚德”出自《易经·坤卦》中的“地势坤，君子以厚德载物”。“博学”出自《礼记·中庸》中的“博学之，审问之，慎思之，明辨之，笃行之”。厚德博学不仅表现为厚人之德、博人之学，还表现为厚社会之德、博社会之学。 为人师表：出自《北齐书·王昕书》：“杨愔重其德业，以为人之师表。”意思是在德行上成为表率。
186	Shenyang Normal University	博学厚德，尚美健行	SCH; MOR0; WILL; ACT	“博学”，出自对培根“知识就是力量”的引申，意在培育一种良好学风并获得广博知识 “厚德”，出自《易经》“地势坤，君子以厚德载物”，意在培养一种高尚的道德品质； “尚美”是马克思“按照美的规律来塑造”思想的贯彻，意在确定一种崇尚美、追求美、构建和谐的价值取向； “健行”出自《易经·乾》“天行健，君子以自强不息”，意在形成一种自强不息的行为方式。 博学厚德、尚美健行，从文化意义上看：体现了中外优秀文化的有机结合。从内在含义上看：体现了党的教育方针。从逻辑关系上看：体现了通过知识理性“博学”走向实践理性“厚德”的自觉与升华；体现了“知”（“博学厚德”）与“行”（“尚美健行”）的统一；体现了“真、善、美”的统一。 “博学厚德、尚美健行”的校训旨在培育一种良好的学风并获得广博知识，培养高尚的道德品质，确立崇尚美、追求美、构建和谐的价值取向，形成一种自强不息的行为方式。要教育学生以校训精神引领自己的…
187	Bohai University	多学博见、和而不同	SCH; INCL	多学博见：中西知识兼容并蓄，广泛的学习和涉猎，成就广博的知识。 和而不同：出自《论语·子路》：“君子和而不同，小人同而不和。”和，与人和谐相处，不同，有自我独特见解；和，不与人针锋相对，作无谓的争辩，不同，不随波逐流，人云亦云；和，协调好各类矛盾，不同，发展区别于人的个性特征。既要和谐相处，又要有独立个性和思想。
188	Anshan Normal University	博雅兼上、知行合一	SCH; WILL; ACT	“博”指知识广博；“雅”指师生思想、素质、行为得体；“知”指知识、理论；“行”指行为、实践。“博雅兼上，知行合一”是指提倡博学和高雅的兼顾，注重理论与实践的统一。 “博雅兼上，知行合一” 是对我校办学指导思想的高度概括，是对师专时期三严校风的继承和发展，既强调了传统，又赋予了新的时代内涵。
189	Dalian University of Foreign Languages	崇德尚文、兼收并蓄	MOR0; SCH; INCL	崇德尚文：提高道德素养，塑造完善人格，推动社会进步；尊重科学文化，坚持终身学习，顺应知识时代。 兼收并蓄：继承民族传统，吸纳人类文明，促进国际交流；拓展求知空间，锻炼综合能力，培养创新人才。
190	Dongbei University of Finance and Economics	博学济世	SCH; MOR3	“博学济世”延展为“德厚笃学、学贯中西；才高敏行、经世济民”。 “博学”源于《礼记·中庸》“博学之，审问之，慎思之，明辨之，笃行之”，《礼记·儒行》“儒有博学而不穷，笃行而不倦”，意在突出为学的广度与深度，强调古今相通、中西结合，提升品德修养和专业才能。 “济世”取“道济天下”“经世济民”之意，源于《周易·系辞上》“知周乎万物，而道济天下，故不过”，《抱朴子·审举》“故披《洪范》而知箕子有经世之器，览九术而见范生怀治国之略”，寓意要将个人所学、理想抱负与社会发展紧密结合，学以致用，贡献国家，造福人民。 取“博学致用、经邦济世”之义。体现了博学的求知精神和济世的广阔胸怀，既是对东北财经大学悠久历史的精辟总结，也是对东财文化精髓的高度概括，更是对东财莘莘学子的殷切嘱托。
191	Criminal Investigation Police University of China	忠诚，求是，团结，奋进	MOR3; SCH; MOR2; WILL	“忠诚，求是，团结，奋进”作为我校校训，既体现了学校的教育理念，也反映了我们学校学生平时的作忠诚，是中国人自古以来追求的一种精神境界，而现在对于我们而言，就是要忠诚于党、忠诚于国家、忠诚于人民；求是，要求我们追求真理、踏实做事；团结，就是心往一处想、劲往一处使，紧密配合、互相成就；奋进，是时代对于青年的要求，历史的车轮滚滚向前，现在需要我们继续向前推进，我们要以奋进之姿交出一份人民满意的答卷！风！
192	Shenyang Sport University	厚德博学，弘毅致强	MOR0; SCH; MOR1; WILL	厚德： 语源自《周易》：“天行健，君子以自强不息；地势坤，君子以厚德载物”，意为有大德、心胸宽广、重公轻私。用于校训，意在反映学校重视塑造学生高尚道德情操的教育理念，突显育人为本，德育为先。 博学： 语源自《礼记.中庸》：“博学之，审问之，慎思之，明辨之，笃行之”，意为学识渊博、知识丰富。用于校训，意在引导师生夯实知识基础，优化知识结构，博采众长，探索新知。 弘毅： 语源自《论语.泰伯》：“士不可以不弘毅，任重而道远”。意为君子必须抱负远大、坚强刚毅，因为自己责任重大，道路遥远。用于校训，意在引导师生塑造具有使命感的人格，勇于担当，奋发有为。 致强： 致，意为求得、达到。强，意为优越。《少年中国说》：“少年强则国强，少年独立则国独立”。用于校训，意在倡导“更快、更高、更强”，引导师生勤学苦练，刻苦钻研，锲而不舍，追求卓越。
193	Shenyang Conservatory of Music	紧张、严肃、刻苦、虚心	MOR1; MOR1; DIL; MOR1	沈阳音乐学院的前身是1938年由毛泽东、周恩来等老一辈无产阶级革命家在延安倡导成立的鲁迅艺术学院，是中国共产党创办的第一所高等艺术学院，毛泽东亲笔题写了“紧张、严肃、刻苦、虚心”的校训。抗日战争胜利后，学院由延安迁至东北，1949年更名为东北鲁迅文艺学院。1953年在东北鲁迅文艺学院音乐部的基础上，成立了东北音乐专科学校，1958年更名为沈阳音乐学院。 建校以来，学院始终以繁荣民族音乐文化、服务人民为己任，在新民主主义革命时期、社会主义革命和建设时期、改革开放和社会主义现代化建设新时期、中国特色社会主义新时代的不同阶段，均作出了突出贡献。 学院继承和弘扬鲁艺的光荣传统，坚持“植根民族，融入时代，突出特色，服务社会”的办学理念，充分发挥高等艺术教育的作用，传承美，创造美，研究美，传播美，引领美，创作演出更多弘扬中国精神、凝聚中国力量的艺术作品，努力建设高水平、有特色、国际化一流音乐院校，实…
194	LuXun Academy of Fine Arts	紧张、严肃、刻苦、虚心	DIL; DIL; DIL; DIL	1938年，在毛泽东、周恩来等老一代领导人的亲自倡导下，鲁迅美术学院前身鲁迅艺术学院在延安创建，毛泽东同志为学院书写校名和“紧张、严肃、刻苦、虚心”的校训。这是中国共产党创建的第一所艺术院校，开启了中国革命文艺的先河。
195	Shenyang University	厚德重学、至诚至勤	MOR0; SCH; MOR1; DIL	全校上下正秉承“厚德重学、至诚至勤”的校训和“爱国明志勤奋自强创新超越务实担当”的新时代沈大精神，大力推进高水平应用型大学建设，奋力谱写全国同类院校一流大学建设的新篇章。 近年来，根据国家和辽宁省引导地方高校转型发展的指导性意见，学校秉承“厚德重学、至诚至勤”的校训精神，坚持服务区域经济社会发展、服务区域产业振兴理念，深入推进学校转型发展并取得了良好成效，“动手能力强、综合素质好”的高层次应用型人才培养特色愈加鲜明，服务辽沈老工业基地新一轮振兴发展的人才支撑与智力支持能力不断增强。 厚德重学，体现沈阳大学在长期办学实践中所积淀的文化传统和文化精神。 厚德：坚持德育在学校教育中的首要地位，坚持人才培养的办学方向。 重学：明确教学的中心地位，突出学校以育人为本的办学思想。厚德和重学是德与才、红与专的高度统一。 “勤”、“诚”二字是“奉天实业学堂”办学百年来传承下来的优良校风。经过了历代学子的…
196	Dalian University	文明,自强,求是,创新	MOR1; WILL; SCH; INNO	“文明”是时代对人才的呼唤,也是我们学校应该追求的特色。未来的世界 充满激烈的竞争。什么是最强的竞争力?文明是最强的竞争力。靠文明 铸成的综合素质,把高度科学文明精神融入每个人的血液,中华民族才 能像奔流不息的黄河永远向前1大连大学才能实现跨越式发展! “自强”是中华民族从届辱到自尊的灵魂,也是大连大学近年来取得重大进 步的精神支柱。消极等待、怨天尤人,水远不能成为强者。越是困难, 就越要自己努力,越是后来者就越要自强不息,这才是大连大学当前和 永远应该倡导的精神状态。 “求是”是历代伟大革命导师提倡的思想方法。我们前面的路还很长,建设 一所优秀大学的任务还很艰巨,只有不倦的学习,崇尚科学,追求真理, 把解放思想、坚持改革的气魄和严谨治学,求是务实的科学态度结合起 来,我们才能进步,事业才能发展。 “创新”是历史前进的钥匙。时代在飞速前进,事物在不断变化,只凭前人 的经验,照搬别人的成果…
197	Liaoning Institute of Science and Technology	明道明德、求新求实	MOR1; MOR0; INNO; ACT	明道，子曰：“吾道一而贯之”。《韩非子·解老》：“道者，万物之所然也，万理之所稽也”。道是宇宙万物生成的根本，是人类社会与自然发展变化所遵循的最基本规律，是中国文化的最高理念。“明道”寓意辽宁科技学院是以追求人与自然、人与社会、人与人之间的和谐为最高宗旨，遵循社会和教育的发展规律，遵循科学的教育教学规律和方法，举办高等教育，努力建设和谐校园。 明德，《论语》语：“志于道，据于德，依于仁，游于艺”。《礼记·大学》：“大学之道，在明明德，在亲民，在止于至善”。“ 德”是“道”的显现，“明德”，使人的美德遵从“道”的本然规律得以彰显，旨在强调大学教育中道德建设的重要性。寓意辽宁科技学院遵循国家教育方针，加强对广大师生思想道德的培养，光大传统美德。广大师生员工知荣明耻，在遵守基本行为准则的基础上，追求更高的思想道德目标。 求新，《礼记·大学》语：“苟日新、日日新，又日新”。《易·系辞》语：“富有…
198	Liaoning Police College	尚德、博能、忠诚、卓越	MOR0; PROF; MOR3; WILL	“忠诚”是人民警察的基本政治品质，也是人民警察核心价值观的灵魂。学校坚持“政治建校、政治建警”方针，建立了党委统一领导、各级党组织齐抓共管的领导体制和工作机制。以培养合格的忠诚卫士为目标，不断创新思想政治教育工作的方式、方法，构建起“教育、管理、文化、实践”四位一体的全方位全过程育人格局。 “尚德、博能、忠诚、卓越”是辽宁警官高等专科学校的校训，在长期的办学实践中，学校坚持把铸造“忠诚”警魂作为培养学生警察职业素质的核心，使学生在磨砺锤炼中打牢“忠诚”警魂，逐渐形成了具有学校特色的“忠诚”文化。【教育部网站-新闻】
199	Shenyang Institute of Engineering	明德致知、精工博学	MOR0; SCH; PROF; SCH	校训8个字，读之韵味流畅，品之立意高远；上下两句相互承接，四层内涵融汇贯通，取意远古先训又纳入现代精神，蕴涵了现实与传统教育的传承关系，构成了工院精神的丰富内涵。八字校训既体现了工程学院的办学理念、治学精神，表达了工院师生的理想目标和共同追求，又勾画了学院美好的发展前景；校训贴切地反映出学院以工程教育为主，培养具有人文素质、创新能力与实践能力较强的应用性工程技术人才和具有工程背景的现代服务与管理人才的培养目标，充分表达了我院特有的治学理念、人文追求和精神内核。
200	Liaodong University	明德笃学、践履惟新	MOR0; SCH; ACT; INNO	辽东学院校训“明德笃学、践履惟新”，内涵深刻，寓意高远，底蕴深厚，是学校精神灵魂的象征。 校训集中体现了“学习科学文化与加强思想道德修养相统一，学习书本知识与投身社会实践相统一”的以人为本的素质教育理念。为培养基础扎实、适应性强，适应国民经济建设和社会事业发展需要的、具有创新精神和较强实践能力的高素质应用型人才提供了核心的价值标准。
201	Dalian Minzu University	团结、自强、求是、进步	MOR2; WILL; SCH; WILL	大连民族大学校训为“团结 自强 求是 进步”。校训体现了学校的办学传统，是学校历史和文化的积淀；凝练了学校以铸牢中华民族共同体意识为主线，努力建设高水平现代化综合大学的目标。校训是师生共同恪守的基本行为准则与道德规范，是优良校风的集中表现。 团结——包含着万众一心、群策群力、风雨同舟、众志成城的含义，起到凝聚人心、凝聚力量、凝聚智慧的作用。 自强——出自《周易》，包含着自我勉励、奋发图强、自信自立的含义，寓意永不懈怠，不断超越，开拓新境界。 求是——包含着探究规律、追求真理的科学精神和严谨态度，强调与时俱进，求真务实，是优良校风的基础。 进步——包含着追求理想、面向未来、向前发展、日新月异的含义，是指不断超越当前，个体和整体均得到发展。
202	Yingkou Institute of Technology	修德、悟道、致知、力行	MOR0; SCH; SCH; ACT	这8字来源于中国古代两位伟大的教育家的语录。 孔子:“德之不修，学之不讲，闻义不能徙，不善不能改，是吾忧也。”（论语-述而） “君子食无求饱，居无求安，敏于事而慎于言，就有道而正焉，可谓好学也已。”（论语-学而） 子曰：“朝闻道，夕死可矣。”（论语-里仁） 子曰：“志于道，据于德，依于仁，游于艺。”（论语-述而） 朱熹：今人将敬、致知来做两事。特敬时只块然独坐，更不去思量；却是今日持敬，明日去思量道理也！岂可如此？但一面自持敬，一面去思虑道理，二者本不相妨。 涵养当用敬，进学则在致知。无事时，且存养在这里，提撕警觉，不要放肆。到那讲习应接，便当思量义理，用义理做将去。无事时，便着存养收拾此心。 问：“‘己欲立而立人，己欲达而达人’，‘立、达’二字，以事推之如何？”曰：二者皆兼内外而言。且如修德，欲德有所成立；做一件事，亦欲成立。如读书，要理会得透彻；做事，亦要做得行。又曰：立是安存底意思…
203	Jilin University	求实创新、励志图强	ACT; INNO; WILL; WILL	校训，是一所大学的精神。是一所大学办学思想、人才目标、人文内涵与学校特有精神的结晶和积淀，是对学校办学宗旨与学术传统的高度概括，是对学校教学理念和大学精神的集中体现，是对学校文化核心内容的最好诠释，最能反映一所大学的传统和特色。校训，是师生员工共同遵守的行为规范，也是师生员工砥砺人格的精神向导，更是师生员工不懈奋斗的人生航标。透过校训，可以走进这所大学的精神境界，去领略深藏其中的无价之宝。校训，对于学校内聚人心、外树形象、永葆活力具有不可替代的作用，对于激励师生员工弘扬传统、开拓创新、奋发向上具有特别重要的意义。 吉林大学校训是“求实创新、励志图强”。吉林大学校训碑揭幕式，是在1996年9月21日建校50周年庆典的时候举行的。校训碑形状像一艘乘风破浪的帆船，象征着学校的事业披荆斩棘，一帆风顺，勇往直前！上面镌刻着由吉林省书法家协会名誉主席金义庵书写的“求实创新 励志图强”八个苍劲有力的红…
204	Yanbian University	求真、至善、融合	SCH; MOR1; INCL	“求真”即指崇尚学术、追求真理。 “至善”即指完善人格、造福人类。 “融合”即指多元共存、融汇创新。
205	Changchun University of Science and Technology	明德、博学、求是、创新	MOR0; SCH; SCH; INNO	在长春理工大学的师生眼中，校训浓缩着学校的办学理念、大学精神和文化传统，是学校的精髓和灵魂。2002年，学校由长春光学精密机械学院更名为长春理工大学后，在师生员工中广泛开展征集新校训的活动，2004年12月，学校拥有了如今“明德、博学、求是、创新”的校训。 “校训的背后，传诵的是老校长王大珩爱国奉献、鞠躬尽瘁的感人故事，凝结着长春理工人对56年办学历史的总结和积淀。”长春理工大学党委副书记、纪委书记杨玉新说，“明德、博学、求是、创新”的八字校训，是许许多多师生行动的指针，引领着他们以实际行动践行社会主义核心价值观。 明德 “弃博学玻”以德为先 “明德，就是要明大德、守公德、严私德。”杨玉新说，高校的根本任务，就是立德树人，把明德放在校训之首，就是要求把高尚的道德和品行作为做人之本、育人之基。“王大珩先生‘弃博学玻’的故事，正是证明了他当年亲手创办长春光学精密机械学院（今天的长春理工大学）…
206	Northeast Electric Power University	勤奋、严谨、求实、创新	DIL; DIL; ACT; INNO	东电品格:无惧风雨、迎难而上，吃苦耐劳、敢于担当，严谨求实、一丝不苟，不甘平庸、志在一流，感恩为先、饮水思源。
207	Changchun University of Technology	爱国、敬业、求实、创新	MOR3; PROF; ACT; INNO	“爱国”提倡爱国主义，爱国主义是精神文明建设的主旋律，是动员和鼓舞中国人民团结奋斗的一面旗帜。学校肩负着育人的历史重任，更需高举爱国主义的伟大旗帜。爱国主义也是大学生必须具备的品德、信念和精神。 “敬业”在我国的各个行业中，尤其是教育领域，迫切需要发扬敬业精神，离开了敬业精神或敬业精神不足，什么事情也干不了。 “求实”求实是我们党积极提倡的良好作风，更是我们工科院校师生应该具备的品格。我们作为教育工作者，培养的是祖国未来的高级工程技术人才，必须教育他们要一切从实际出发、脚踏实地、实事求是、说真话、做实事、实心实意、实实在在地为祖国做贡献。 “创新”创新是一个民族进步的灵魂，是国家兴旺发达的不竭动力。如果一个国家自主创新能力不强，一味靠技术引进，就永远难以摆脱技术落后的局面，一个没有创新能力的民族，难以屹立于世界先进民族之林。尤其是高校，我们培养的是祖国跨世纪的建设者和接班人，广大学生创新…
208	Jilin Jianzhu University	不管遇到什么障碍,我都要朝着我的目标前进	WILL	学校始终坚持“为党育人，为国育才”初心使命，坚持“尚德唯实、笃行筑成”人才培养理念，注重人才培养质量提升和培养学生的创新精神、实践能力和社会责任感。 学校积极构建“栋梁”特色文化育人体系，以建筑文化筑基、以“栋梁”精神铸魂，突出行业领域元素，凸显建筑文化标识，形成有“建筑感、工程味、土木情”鲜明辨识度的建大特色文化底蕴。
209	Jilin Institute of Chemical Technology	严谨、勤奋、求实、进取	DIL; DIL; ACT; WILL	新时代开启新征程，新时代呼唤新作为。2018年，吉林化工学院将迎来办学60周年校庆，厚韵甲子，筑梦起航。学校将秉承“严谨、勤奋、求实、进取”的校训，不忘初心，笃定前行，为建设“竞争力强、影响力广、具有化工优势和鲜明特色、多学科协调发展的省属工科一流大学”的目标努力奋斗！
210	Jilin Agricultural University	明德崇智、厚朴笃行	MOR0; SCH; MOR1; ACT	“明德”乃为人处事之道，“崇智”为治学求知之风，“厚朴”系宽厚质朴之气，“笃行”寓诚信亲历之为。明德崇智，体现在办学过程中就是要传承文明、守护良知、追求科学真理。厚朴笃行，要求农大人做人要忠厚淳朴，做事要求真务实，要把自己的信仰和追求落实在实际行动中。 高举习近平新时代中国特色社会主义思想伟大旗帜，深入贯彻落实习近平总书记关于教育的重要论述和视察吉林重要讲话重要指示精神，坚持党对学校的全面领导，坚持扎根中国大地办大学，坚持以师生为中心，遵循和把握高等教育发展规律，以立德树人为根本，以强农兴农为己任，以深化改革为动力，以人才队伍为支撑，以争创一流为导向，坚持走以质量提升为核心的内涵式发展道路，奋力夺取国际知名高水平农业大学建设新胜利。 人才培养目标定位：培养基础扎实、素养优秀、专业精通、实践能力和创新能力强，具有国际视野，德智体美劳全面发展的学术型、应用型、复合型高素质人才。
211	Changchun University of Chinese Medicine	启古纳今,厚德精术	INNO; MOR1; PROF	“启古纳今”体现了中医药事业继承不泥古，发扬不离宗的发展思路。继承是发展的前提，强调在系统、完整、充分地继承中医药传统基础上，实现更好地发展，同时又要广纳现代科学技术并根据中医药学自身规律，客观认识、研究、丰富、发展，与时俱进，积极促进学科交叉与融合，不断扩大中医药学的国际交流与合作。 “厚德精术”体现了教育过程和教育目标的统一，强化思想道德建设，在实践中不断培养和提升教师的师德、医生的医德和学生的品德，达到相得益彰的思想境界。既要医德高尚，又要医术精湛，相互促进，不可偏废。
212	Northeast Normal University	勤奋创新、为人师表	DIL; INNO; PROF	“勤奋创新、为人师表”的校训，凝聚着东北师大的办学传统与奋发精神。其深刻内涵是：勤奋出天才，勤奋是教学、科研、学习和工作的成功之母。创新是学校内涵发展、提升水平的不竭动力和源泉。为人师表是教师职业道德的灵魂，是立德树人、教书育人的根本，也是东师人崇高的精神追求。校训深深地启迪每位东师人，要勤奋、创新、为人师表。每位东师人都深深地受校训精神熏陶，不断以校训精神激励自己。
213	Beihua University	崇德尚学，自强力行	MOR0; SCH; WILL; ACT	崇德：崇尚有德的人。语出《书·武成》“崇德报功”。 尚学：尊重知识，追求真理。尚：推崇；尊重。学：学问；知识；学说；学术。 自强：自己努力向上。语出：《易·乾》“天行健，君子以自强不息”。《礼记·学记》“知困，然后自强也”。 力行：努力从事,尽力去做。语出《礼记·中庸》“好学近乎知,力行近乎仁”。《史记·儒林列传》“为治者不在多言，顾力行何如耳”。 “崇德尚学，自强力行”,比较贴切地概括了我校的发展历程与价值追求,有较强的感召力和渗透力。 从哲学视角看，它反映了我校坚持党的教育方针和认知自我的态度方法，体现了尊重知识、追求真理的学术取向，自强不息、身体力行的干事精神和以学生为本的办学理念，是世界观和方法论相统一的哲学概括。 从历史视角看，它反映了原四校的历史沉淀、凝聚和发展，符合学校的自我定位。既是原四校校训及优良传统的继承和发扬，又是学校组建以来所积淀成果的总结和升华。 从文化视角看，…
214	Tonghua Normal University	崇德广业、与时偕行	MOR0; PROF; ACT	“崇德广业，与时偕行”是学校半个多世纪办学历史的精神积淀，来源传统文化，紧扣时代脉搏，彰显了通师人以德育人、求变求新的创业立业思想。 “崇德广业，与时偕行”八字校训，是通化师范学院多年来办学经验的积淀，是办校精神的传承，集中体现了我校的教育观、质量观、发展观和人才观。在新的历史起点上，它将成为我校师生员工共同的价值追求和行为规范，全校师生将在校训的激励下，把学校建设得更加美好。【校训石揭幕仪式校长致辞】 “崇德广业”，出自《周易·系辞上》：“圣人所以崇德而广业也，知崇礼卑。崇效天，卑法地。”崇德，即崇尚道德修养，升华个人品德；广业，即广博地拓展功业，济世利民。 “与时偕行”，出自《周易·乾》“终日乾乾，与时偕行。”即与时代同步而行。 “崇德广业，与时偕行”意谓通师人以弘扬中华民族的优秀道德文化为根基，加强道德修养，提升个人品德，立德树人，为人师表；以济世利民为宗旨，开拓事业，博大学业，奋…
215	Jilin Normal University	好学近知，力行近仁	SCH; ACT	2014年8月27日，吉林电视台“吉林新闻联播”节目对我校校训精神进行解读，介绍了我校多年来秉承“好学近知，力行近仁”的八字校训，努力建设高层次高水平师范大学，致力于向社会输出大批合格人才的办学成就和价值追求。 校长杨景海在接受采访时说，“好学近知，力行近仁”是吉林师大近60年来发展历程的凝练。它主要是从“知”和“行”两者之间的关系上来体现我们的办学理念和价值追求，实质上是确立了一种终身学习和知行统一的行为准则，它也体现了吉师人“为人朴实，做事踏实，治学坚实”的个性品格。 我校师生代表从不同角度阐述了对“好学近知，力行近仁”的理解及其对学校发展的重大意义。他们纷纷表示，教师在教书育人的工作中、毕业生在奔赴工作岗位后要继续传承校训精神，不断将其发扬光大，使其成为助推学校快速发展、科学发展的精神源泉与不竭动力。 语出《中庸》"子曰：好学近乎知，力行近乎仁，知耻近乎勇。知斯三者，则知所以修 身…
216	Jilin Engineering Normal University	笃学、敬业、求是、创新	SCH; PROF; SCH; INNO	“笃学”：强调以求真务实的态度做学问。“笃”是笃实、笃厚的意思，“学”就要逐字逐句领悟，全面系统掌握，要学以致用、专心致志。 “敬业”：是人的意识、思维活动的体现，是一种品质，是人内在的品行修养，使之转化为强烈的服务意识和忠于本职工作的事业感，重视本职工作的责任感和成就本职工作的使命感。 “求是”：要求从实际出发, 以实为本，发扬求是、求实精神, 不唯上、不唯书、只唯实。通过严谨的教学过程, 培养和铸造我校严谨求实的态度, 培养学生实事求是、严谨求实的作风。 “创新”： 创新是科学的生命之所在，没有创新，科学就会停滞不前。要求学校教师在培养学生的过程中充分发挥第一课堂主渠道的作用，把创新教育的有关内容渗透到教学过程之中。 新时代新征程，学校将坚持以习近平新时代中国特色社会主义思想为指导，深入贯彻党的二十大精神，秉承“笃学敬业，求是创新”校训和“精益求精，崇师尚学”的工师精神，扎根中国大地…
217	Changchun Normal University	学无止境,行为师表	SCH; PROF	学无止境，行为师表——长春师范大学的校训，是对全校师生的训诫。教师作为人类灵魂的工程师，不仅要教好书，还要育好人，各个方面都要为人师表。教师是学生增长知识和思想进步的导师，他的一言一行，都会对学生产生影响，一定要在思想政治上、道德品质上、学识学风上，全面以身作则，自觉率先垂范，这样才能为人师表。
218	Baicheng Normal University	厚德、明辨、博学、笃行	MOR0; REAS; SCH; ACT	厚德：出自《周易》“天行健，君子以自强不息。地势坤，君子以厚德载物”。心胸宽广不以个人得失为主，重公轻私，谓之厚德。 明辨、博学、笃行：出自《礼·中庸》：“博学也，审问也，慎思也，明辨也，笃行也。” 意思是做事要广泛的学习，仔细的探究，谨慎的思考，明确的辨别，最后要切实的去实行。
219	JiLin University of Finance and Economics	明德崇实	MOR0; ACT	校训是广大师生共同遵守的基本行为准则与道德规范，它既是一个学校办学理念、治校精神的反映，也 明德：出自 《大学》开篇： "大学之道，在明明德"。体现出学校坚持育人为本，德育为先，把立德树人作为教育的首要工作，培养高素质人才。 崇实：崇尚务实。包含两层含义：一是在思想上崇尚实事求是，求真务实，诚实朴实，做事踏实；二是在培养人才方面突出实务教学，注重社会实践。 《吉林财经大学章程》明确规定，学校人才培养目标定位是培养思想充实、为人诚实、作风朴实、基础扎实、工作务实的专门人才及创新人才。 明德崇实：立德树人、实事求是。
220	Jilin Institute Of Physical Education	厚德博学,弘毅诚勇	MOR0; SCH; MOR1; MOR1; MOR1	厚德：为开阔、大度、包容之意，指道德醇厚，怀有大德。语出《周易·坤卦》“地势坤，君子以厚德载物。”大地平坦铺展，顺成天道（规律）而动；君子（有德之人）应效法大地，以无比深厚的德行来承担重大的历史责任。 博学：即学识广博。语出《礼记·中庸》“博学之，审问之，慎思之，明辨之，笃行之。”博学既包括理论知识，也包括实践技能。意即培养学生形成学识广博的知识结构和“一专多能”的实践与创新能力，使其成为德智体美劳全面发展的、堪当民族复兴大任的时代新人。 弘毅：“弘”就是要抱负远大；“毅”，就是意志坚强。语出《论语·泰伯》“士不可以不弘毅，任重而道远”。其意是人要志向远大，意志坚强，因为他肩负重任，路途遥远。程颐认为：“弘而不毅，则无规矩而难立，毅而不弘，则隘陋而无以居中之。”可以看出，弘和毅对于一个人成就道德品质和提高知识素养的重要性。“弘毅”与“出则任重道远”暗合，体现出学生对国家、社会所肩负的责任…
221	Jilin University of Arts	博学、求真、至善、尽美	SCH; SCH; MOR1; PROF	“博学”：语出《 论语子张》“博学而笃志，切问而近思。”既指博采众长 ，亦指学识深厚。“博学”是学习之道，是勤学之果。引“博学”二字，意在倡导学生兼容并蓄，文理齐修，涉猎百科，成为复合型的栋梁之材；教师更新理念，创新教法 ，完善学养，成就学贯中西的专业大师。 “求真”：出自《 闽中理学渊源考》“求真于未始有伪之先，而性之真可见矣。”意指崇尚科学，追求真知，同时包含有讲究真才实学之意。“求真”是严谨的治学态度，是科学的治学方法 ，是讲求诚信的体现。教育家陶行知说过，“千教万教，教人求真；千学万学，学做真人。”引“求真”二字，意在要求师生不断追求和探索真知，勇于质疑和善于质疑。 “至善”：出自《 大学》开篇“大学之道，在明明德，在亲民，在止于至善 。”意指道德修为的最高境界和人生追求的理想所在。“ 至善”是高等教育的本质要求，是人类理性的集中表现。 引“至善”二字，意在引领师生永不止息，创新…
222	Jilin Business and Technology College	博学善思、厚德自强	SCH; REAS; MOR0; WILL	博学善思 义为广博宽泛地获取知识，充实提高自己；同时还要善于思索，触类旁通，学以致用。 厚德自强 义为追求崇高，加强品德修养；同时还要发奋图强，拼搏进取，厚积薄发，走向成功。 博学善思 厚德自强 义为要有丰厚的知识、深邃的思想、高强的本领、高尚的品德，创新超越，自强不息，实现人生的理想，成为社会的栋梁之才。
223	Changchun Institute Of Technology	明德致远、笃行务实	MOR0; WILL; ACT; ACT	“明德致远”：体现学校办学五十多年来追求真理，追求知识，塑造高尚人格，培养学生树立献身祖国建设的理想，促进学生德智体全面发展的不懈追求和努力。 “笃行务实”：反映学校在培养合格的社会主义建设者和接班人过程中对踏实严谨，务实求真的作风的养成和矢志不渝的追求。 以文化人，以美育人。学校注重学生的能力提升与身心塑造、道德养成与情怀涵育、价值观培育与科学方法培养，充分发挥文化育人功能，秉承“明德致远、笃行务实”的校训，传承“重教崇实、和谐创新”的校风，广泛开展校园文化活动，支持学生参加各级各类竞赛。
224	JiLin Agricultural Science and Technology University	厚德图本、励学笃行	MOR0; PROF; SCH; ACT	厚德：出自《周易》中的卦辞：“天行健，君子以自强不息；地势坤，君子以厚德载物”。 心胸宽广，品行端正，品德高尚，谓之厚德。校训中除上述含义外，引申为广大师生在工作、学习和生活中要着力铸就高尚的品德，养成良好的品行，把它作为做人做事的首要条件。春风化雨，潜移默化。激励自身，感染别人，完善自身，影响别人，进而形成风清气正的校风，提升学校师生整体道德水平和精神风貌，是学校办学的首要目的和基本前提。 图本：取自1907年东三省总督徐世昌建议朝廷在吉林省设置中等农业学堂的奏折中提出的“以厚民生，以图本计”句。“以厚民生，以图本计”意为农业是百姓衣食之源、生存之本，发展农业教育，培养农业人才，是惠及民生和国家社稷之本。奏折中以农为本之意，符合我国当时及目前国情，符合学校办学目标定位和办学特色。可进一步引申为“以人为本”之意，坚持教育以学生为本，坚持办学以教师为本，这也是学校的办学思想和办学方向，也是…
225	Jilin Police College	报国荣警、察己修身	MOR3; MOR3; MOR1; MOR1	报国荣警：忠于党，忠于祖国，忠于人民，忠于法律。怀爱国之心，励报国之志，铸建国之才，尽效国之力，崇尚警队荣誉，维护警院形象。 察己修身：时刻自重、自省、自警、自励，坚持以德修身，以学修业，以静修性，以省修心，团结和谐，务实重行，精业奋进。 总而言之，要以报国荣警、察己修身为学院的核心价值观，始终保持政治坚定、励志笃行、修德精业，忠实践行全心全意为人民服务的宗旨。
226	Changchun University	知行合一,诚信至善	ACT; MOR1; MOR1	“知行合一”是明朝思想家王阳明提出的。知，是指应掌握的专业理论与素养；行，是指把所学的理论知识应用于实践。对于学校来讲是把学生培养成为理论水平 较高和实践能力较强，全面发展的应用型高级专门人才。对于师生来讲要把所学的理论知识、技能运用到教学和实践中去，坚持身体力行，做到知行统一，学有所 用，不断地发展自己，超越自己，奉献社会，实现人生的价值和理想。 “诚信”即诚实不欺，讲求信用。孟子在《孟子·离娄上》中将“诚”定义为自然界和人类社会的最高道德范畴；“信”就是信义、信誉、信用、信任、信赖。 “诚”和“信”一脉相承，以诚待人，以信立世，传承文明，治学育人，追求完美，是思想和行动达到的最高境界。 “至善”出自《四书》的《大学》，“至善，则事理当然之极也。言明明德、亲民，皆当止于至善”。强调通过追求“至善”的实践而不断进取，以达到最高的境 界，寓示长大人做人、做学问、干事业追求尽善尽美，永无止境。
227	Jilin Medical University	博学厚德、扶伤济世	SCH; MOR0; PROF; MOR3	“博学”出自《礼记·中庸》十九章： “博学之，审问之，慎思之，明辨之，笃行之。”“博学之”意谓为学习首先要广泛猎取，培养充沛而旺盛的好奇心。好奇心丧失了，为学的欲望随之而消亡，博学遂为不可能之事。“博”还意味着博大和宽容。惟有博大和宽容，才能兼容并包，使为学具有世界眼光和开放胸襟，真正做到“海纳百川、有容乃大”。因此博学乃能成为为学的第一阶段。越过这一阶段，为学就是无根之木、无源之水。 “厚德”出自《周易》：“天行健，君子以自强不息（乾卦）；地势坤，君子以厚德载物（坤卦）”。意谓：天（即自然）的运动刚强劲健，相应于此，君子应刚毅坚卓，发愤图强；大地的气势厚实和顺，君子应增厚美德，容载万物。译为：君子应该像天宇一样运行不息，即使颠沛流离，也不屈不挠；如果你是君子，接物度量就应像大地一样，没有任何东西不能承载。 “扶伤济世”即从医学院校的性质出发，以要求师生。扶伤济世有两层意思，其一即字面意…
228	Heilongjiang University	博学慎思、参天尽物	SCH; REAS; MOR1	博学慎思”出于《礼记·中庸》：“博学之，审问之，慎思之，明辨之，笃行之。”（20章） “参天尽物”出于《礼记·中庸》：“唯天下至诚，为能尽其性；能尽其性，则能尽人之性；能尽人之性，则能尽物之性；能行物之性，则可以赞天地之化育；可以赞天地之化育，则可以与天地参矣。”（22章） 张之洞在著名的《劝学篇·循序第七》中概括儒家学派的全部学问只有三句话：“空门之学，博文而约礼，温故而知新，参天而尽物。”校训两点已占2/3，至于“温故知新”不过具体学习方法，同其他两点相比就显得不那么重要了。 “博学慎思”意味广泛的学习、多方面的吸收知识，然后慎重细密地思考、理解、消化，这是一个学习的全过程。 “参天尽物”，“参”是参与的意思，朱熹注：“与天地参，谓与天地并立为三也。”“尽”，全部发挥出。原意是说每个人能全部发挥出自己诚信的本性，人类就能显现出人性的全部美好，万物也能与人和谐相处。然后能赞助天地化育万…
229	Harbin Institute of Technology	规格严格、功夫到家	DIL; PROF	规格严格，功夫到家”是20世纪50年代由时任校长的李昌等领导同志归纳概括而成。 “规格严格，功夫到家”体现了过程管理与目标管理相结合的思想。“规格严格”有两层意思：首先要有“规格”，其次要“严格”遵守。功夫到家也有两层意思：一是要肯下“功夫”，二是功夫要下到点子上，下到程度。“规格严格”与“功夫到家”，二者是辩证的统一。只有“规格严格”，“功夫到家”才有明确的目标与要求；只有“功夫到家”，“规格严格”的实现才有可靠的保证。受惠于“规格严格，功夫到家”的办学传统，哈工大由小到大，由弱变强。随着时代的发展，“规格严格，功夫到家”将不断补充其崭新的内涵。
230	Harbin University of Science and Technology	知行统一,博厚悠远	SCH; ACT; MOR1	知行统一:“知”指知识或道德观念；“行”指行为、行动；“统一”即部分联成整体，归于一致。“知行统一”，源自于著名教育家陶行知先生的“行是知之始，知是行之成。”其意义在于要具有高尚的道德品质和远大的理想抱负，掌握过硬的科学文化知识，注重基础，崇尚实践，真正做到知与行的完美统一。 博厚悠远:“博”指大、广、通、众多、丰富；“厚”指深、重、宽厚；“悠远”即长久，远大。“博厚悠远”出自《中庸》“故至诚无息，不息则久，久则征，征则悠远，悠远则博厚，博厚则高明”。其意义在于要不断加强自身修养，坚持不懈地以真诚的态度追求真理，要博学厚德，为人做事目光远大，不急功近利。
231	Harbin Engineering University	大工至善、大学至真	MOR1; SCH	2005年1月13日，经教代会常设主席团全体会议讨论并一致通过，哈尔滨工程大学校训“大工至善，大学至真”正式确定。“大工至善，大学至 真”嵌有“工学”二字，这两个字是毛泽东主席给哈军工训词中的主要关键词。校训仿“大道至简”、“大医至爱”的句式结构。“工”意为工程、工作，可引申为 改造世界的一切活动；“学”意为学问、学习，可引申为认识世界的一切活动。“真”引申为真理、真谛，是客观事物及其规律在人们意识中的正确反映。“善”是 “好”、“办好”的意思。“至善”是“最好”的境界，不只是满足于较好、更好，而努力达到最好、第一流。
232	Heilongjiang University of Science and Technology	厚德博学，强吾兴邦	MOR0; SCH; MOR1; MOR3	校训体现了一所学校的办学理念和价值追求， 是用来劝勉和激励师生员工奋发进取的无形精神力量。校训表达了办学者所寄托的精神追求，它超越了对具体学习活动方面的要求，更多地体现了对人的价值以及大学社会责任的超越。 “厚德博学，强吾兴邦”的内涵阐释—— 厚德，指在德的方面有深厚的修养。《易经》有“地势坤，君子以厚德载物”，地厚而载物。《易经》有“坤厚载物，德和无疆。”《国语•晋书》：“唯厚德者能多福，无德而服者众，必自伤也。”厚德，意指通过加强道德修养，以德立身，以德立国。博学，博者大，通达，多闻；学，学问。《荀子•修身》中：“多闻曰博，少闻曰浅”。意指为学要以博大、宽容的态度，广泛猎取知识，不断创新。强，强盛、强大，增强，有促进成长、成才之意。《盐铁论•非鞅》：“秦任商君，国以富强”。《荀子•天论》：“强本而节用，则天下不能贫”。吾，我（们）。《商君书•更法》：“今吾欲变法以治”。强吾，意指学校…
233	Northeast Petroleum University	艰苦创业、严谨治学	DIL; SCH	东北石油大学的校训是以“爱国、创业、求实、奉献”的大庆精神为根基形成的，既浓缩了学校诞生于大庆石油会战、与新中国石油工业同生共长的红色历史，也体现了学校“质量立校、人才强校、改革创新、特色创优”的办学理念和“大庆精神办学育人”特色。在办学实践中，与时俱进融入了“躬耕黑土、加油中国”深厚情怀、“五心四力”大庆精神特质的人才培养目标等新时代内涵。 “艰苦创业”主要包括“有条件要上，没有条件创造条件也要上”的艰苦奋斗精神，“到西部去，到基层去，到祖国和人民最需要的地方去”的建功立业精神，“结合兴趣，发挥优势，以创新创业带动就业”的创新创业精神，等等。 “严谨治学”主要包括“刻苦学习，勇于探求，锲而不舍”的求知精神，“坚持真理，崇尚科学，严谨务实”的求实精神，“努力钻研，积极进取，自主创新”的求新精神，等等。
234	Jiamusi University	明德砺学、崇尚实践	MOR0; SCH; ACT	学校以习近平新时代中国特色社会主义思想为指导，始终坚持社会主义办学方向，全面贯彻党的教育方针，落实立德树人根本任务，秉承“明德砺学，崇尚实践”的校训和“团结、勤奋、求是、创新”的校风，坚持学生为本，坚持立德树人，不断强化内涵建设，持续推进高质量发展，正在向着特色鲜明的高水平地方综合性大学建设目标而努力奋进。
235	Heilongjiang Bayi Agricultural University	困知勉行、积厚成器	SCH; ACT; DIL	困知勉行：出自《礼记·中庸》：“或生而知之，或学而知之，或困而知之，及其知之一也。或安而行之，或利而行之，或勉强而行之，及其成功一也。” 困知：遇困而求知；勉行：尽力实行。在不断克服困难中求得知识，有了知识就勉力实行。 积厚成器：出自《旧唐书·韩弘传》：“降神挺材，积厚成器，中蕴深闳之量，外标严重之姿。”意思是指指根基深厚，养成才干。 校训是激励全校师生，要有不怕困难勇于探索的精神，不断进取，厚积薄发，成为国家的栋梁之才。
236	Northeast Agricultural University	博学笃行、明德亲民	SCH; ACT; MOR0; MOR2	“博学笃行”出自《礼记·中庸》。是指以渊博和诚笃为指标的学行态度，可视为对人“才”的要求。 明德亲民是指要注重思想品德的完善、人文素养的汲取，注重国家发展、民族兴衰、个人责任，注重修身正己。关注民生，具有强烈的服务国家和人民的责任感。
237	Northeast Forestry University	学参天地、德合自然	SCH; MOR0	“学参天地”取意出自《中庸》：“唯天下至诚……可以赞天地之化育，则可以与天地参矣”( 《中庸 第二十二章》)。 后朱子又发扬其说：“此儒者之学，必至参天地，赞化育，然后为功用之全也”（ 《白鹿洞志》）。 “学参天地”古意为“治大学问者可了解天地间的规律，参与天地生化不息的进程。”现在可以解释为“治学要努力学习天地间的知识、学问，探索世界的奥秘，揭示事物的科学规律。” “德合自然”取意出自《老子》： “人法地，地法天，天法道，道法自然”（ 《老子 第二十五章》）。 道法自然中的自然，指“道”的自然状态。老子原文的古意有两层：第一是说天、地、人都有其应该遵循的自然规律，第二是说天、地、人、物都应遵循自然规律。老子在这里其实追求一种人与自然、人与社会、人与人的和谐相处的境界。“德合自然”字面的含义为道德要符合自然规律，可以引申解释为：“不断进取，按照自然规律办事，树立科学的道德观，努力实现人与…
238	Harbin Medical University	木直中绳、博学载医	MOR1; SCH; PROF	“木直中绳”含义为各种可用的木料经木师测量加工成材；意寓学生经培养后成材。 “博学载医”含义为渊博的知识，承载博大精深的医学。
239	Heilongjiang University of Chinese Medicine	勤奋、求真、博采、创新	DIL; SCH; SCH; INNO	勤奋学习，求真务实，博学广涉，开拓创新，成为栋梁之才。 黑龙江中医药大学始建于1954年，学校秉承“勤奋、求真、博采、创新”的校训精神，始终坚持以中医药质量文化为引领，强化教育科研的基础性作用。学校多年来立足中医药高等教育教学改革和人才培养。 六十年来，学校秉承“勤奋、求真、博采、创新”的校训精神，以弘扬中医药精华，造福人类健康为己任，以大医精诚，止于至善为依归，筚路蓝缕，砥砺奋发，在高素质人才培养、高水平科学研究、全方位社会服务以及文化传承与创新等方面不断进步，成就辉煌。
240	Mudanjiang Medical College	立德立行、唯实唯新	MOR0; ACT; ACT; INNO	学校秉承“立德立行、唯实唯新”的校训，弘扬“执着、爱校、求实、合作、创新、奉献”的牡医精神，坚持“人本、厚德、尚能、强技”的办学理念，突出“以德为先，注重人文，强化实践，服务基层”的办学特色，注重学生实践能力的培养，毕业生综合素质和适应能力不断提高，受到用人单位的欢迎，得到了社会的广泛认可。
241	Harbin Normal University	敦品励学、弘毅致远	MOR1; SCH; MOR1; WILL	“敦”本意为厚重，引申为奋勉；敦品，指砥砺品德。励，意为奋勉、致力；励学，指发奋学习。“敦品励学”出自清学者梁章钜《归田琐记·谢古梅先生》：“先生敦品励学，实为儒宗。”这里用“敦品励学”来评价可为儒者典范的人，说明它反映了学者致力于自身道德修养、发奋学习的高尚境界。 “弘毅”意为心胸宽阔而意志刚强，出自《论语·泰伯》“曾子曰：士不可不弘毅，任重而道远。仁以为己任，不亦重乎？死而后已，不亦远乎？ ”意思是，一个士(古代指有理想有节操的知识分子)不能不心胸广阔而意志刚强，因为他肩负重任，而面临的路又很长。 “致远”本意为达到远方，出自《墨子·亲士》“良马难乘，然可以任重致远。”后多比喻人才卓越，可任大事。《文子·上仁》中有“非淡漠无以明德，非宁静无以致远。”三国诸葛亮在《诫子书》中引为“非淡泊无以明志，非宁静无以致远”。 校训体现了哈师大师生追求道德、学问、胸怀广阔、意志刚强的品质和决心成为…
242	Qiqihar University	养正毓德,精存自生	MOR1; MOR1; MOR	“养正毓德”源于《易经》。《易经·蒙卦·彖辞》曰：“蒙以养正，圣功也。”《易经·蒙卦·象辞》曰：“蒙，君子以果行育德。”毓，即育。《易经·蒙卦》提出的“养正”教育理念，即希望教育者注重培养学生端正的心性及行为，作为最古老的教育思想而影响着中国。 “精存自生”语出《管子·内业》。《管子·内业》曰：“精存自生，其外安荣，内藏以为泉原，浩然和平，以为气渊。渊之不涸，四体乃固；泉之不竭，九窍遂通。乃能穷天地，被四海。”《管子》认为，在物为精，在天为气，在人为德。凡世界上万事万物，都不可缺少精气神；就人事而言，既为人性道德的本原，亦是事业昌茂的渊泉。
243	Mudanjiang Normal University	崇德尚学、厚积薄发	MOR0; SCH; DIL	崇德，出自《论语 颜渊》：“主忠信，徙义，崇德也。”“崇德”即推崇道德；“尚学”即崇尚学问。崇德尚学内涵为立德于学、修德积学。 厚积薄发出自苏轼《杂说 送张琥》：“博观而约取，厚积而薄发。”即日积月累、求博达深、蓄势而发。意思是大量地、充分地积蓄而后少量地、慢慢地放出。指经过长时间充分的积累，才能后劲十足、大有可为。
244	Harbin University	崇德砺志、博学笃行	MOR0; WILL; SCH; ACT	校训既吸取了传统教育思想的精华，也反映了现代教育思想理念和我校的办学优良传统和经验。 崇德砺志，是在思想品德方面对广大师生的训导和基本要求。 “崇德”就是崇尚品德，注重道德品性的修养。中国传统教育思想强调：“上贤以崇德”（《礼记·王制》）；“大学之道，在明明德”（《礼记·大学》）。我们将“崇德”列为首位，体现了我校的“育人为本，德育为先”的办学指导思想。 “砺志”就是磨砺意志，注重坚强意志的锻炼和养成。传统教育思想强调“金就砺则利”（《荀子·劝学》），“砺乃锋刃”（《尚书·费誓》）。“砺志”就是要求学生要有志向，志存高远，有爱国之心，报国之志，并且具备坚强的意志和刚毅果敢的品格。 博学笃行，是在业务学习方面对广大师生的训导和基本要求。 中国传统教育思想注重“博学之，审用之，慎思之，明辨之，笃行之”的关连和统一。（《礼记·中庸》） “博学”，就是博通精学，注重博与精的有机结合。这不仅反映了…
245	Daqing Normal University	自强不息，臻于至善	WILL; MOR1	《周易·乾》：“天行健，君子以自强不息”。“自强不息”意味自觉地奋发图强，永不懈怠。《礼记·大学》：“大学之道，在明明德，在亲民，在止于至善”。“臻于至善”是指为了达到尽善尽美的完美境界而不懈努力。
246	Suihua University	厚德载物、经世致用	MOR0; MOR3; ACT	“厚德载物”出自《周易》：“天行健，君子以自强不息；地势坤，君子以厚德载物”。在古代，厚德载物解释为以深厚的德则育人利物，今天用来指以崇高的道德、博大精深的学识育学子成长。德，指道德，物，指我以外的客观世界，道德高尚，才能处理好物我之间的关系。因而，厚德载物是一种高尚的博大的道德素养，是道德回归，是对人生命内涵的体悟和发展。 “厚德载物”用以督促教师，以厚德对待他人，无论是聪明、愚笨的都给予一定的包容和宽忍。其次用以警示学生，要有团结协作，严于律己，无私奉献的精神，要以饱满的热情、丰富的知识奉献社会。当今提倡构建和谐社会，厚德载物的作用尤为重要。 “经世致用”，“经世”出自《庄子》“春秋经世，先王之志”。经世，治理世事。经，治理：经风雨见世面，不在书斋里死读书。强调志存高远。胸怀天下，求索治世之道。做学问不是为了个人名利，而是为了服务于社会，造福民生，匡世济民。“致用”出自《周易》“精义…
247	Harbin University of Commerce	求真至善、修德允能	SCH; MOR1; MOR0; INCL	“求真至善，修德允能”内涵丰富，目标宏远。“求真”乃谓以孜孜不倦的精神，以百折不回的求知欲望，去顽强探索，寻求真理、真知、真实、真诚，真正把握事物发展的内在规律与做人、务事之真谛。“至善”者，语出《大学》：“大学之道，在明明德，在亲民，在止于至善。”不仅学究天人，而且品德高尚，达于世事、社会与自然之和谐，掘弃小我，达于大我；不仅独善其身，而且胸怀圜宇，兼济天下。“修德”是品行索求，“君子以厚德载物”，生生不息。“允能”者容纳、允许能者为先之意也。有兼容、开放、平等之寓意，大道之行，天下为公，是为大同。他进一步阐释，求真是过程、至善是目标、修德是方法、允能是条件，四者缺一不可，只有相辅相成，才能培养出合格的党和国家建设者。
248	Harbin Sport University	崇德尚勇，求知躬行	MOR0; MOR1; SCH; ACT	崇德：意为尊重道德，完善品德，塑造美德。具有理解、普及、恪守和弘扬道德之意。语出《礼记·大学》：“大学之道，在明明德。”即通过学习和实践发掘光大内在的优良品德。道德文化是民族文化的根柢；道德教育，是现代教育的灵魂。千教万教，教人明德；千育万育，育人觉悟。只有学习、觉悟道德，修养道德，才能不断提升自身的品德、气节和境界，才能完善自我，增强社会责任感和使命感，明礼诚信、团结友爱、勤俭自强、敬业奉献。 将“崇德”作为校训之首，是同我校所倡导的加强文化素质教育、“首先要教会学生做人”、建设无污染校园等精神相一致，体现出“德育为先”的现代人才培养理念和导向。 尚勇：意为推崇勇敢、刚毅、顽强拼搏之精神，追求有勇气、有魄力、不怕危险和困难的品质。见《墨子·经上》“勇，志之所以敢也”；《礼记·聘义》“故勇敢、强有力者，天下无事则用之于礼仪，天下有事则用之于战胜”。也就是说，探求真理者必先立其志，志于勇，…
249	Harbin Finance University	以诚为金,礼融天下	MOR1; INCL	诚信作为一种价值理念，是社会主义核心价值观的重要内容。古往今来，诚信都是社会不可或缺的运行规则，是社会进步无比珍贵的精神财富。人以诚立身、国以诚立心。学校办学也当以诚树人。尤其作为我们金融院校，更要“以诚为金”。 “礼”于中国历史一直占有重要地位。《论语》曰：“不学礼，无以立”。孔子主张国家治理要“道之以德，齐之以礼”。学校的教育也不能让“礼”缺位。时代赋予“礼”更多的内涵。我们有理由相信，坚持正确的价值导向，“金院人”会因为“礼”而更加友善和谐，更能融于职场，融于世界。正所谓“国虽大，好战必亡”，学院虽小，“礼融天下”。 “以诚为金 礼融天下”易懂易记，不照搬、不重复，突出了我院的鲜明个性，对开展我院富有特色的育人工作有着明确具体的指导意义。一诚一礼，一金一融，如条条秀美的丝带彰显着我们金院人的品质：请社会记住，我们是“讲诚信、重礼仪、懂金融”的金院人。 2015年5月8日，经我院第六…
250	Qiqihar Medical University	大学至善，大医精诚	SCH; MOR1; MOR1; PROF	大学至善：语出“四书”中的《大学》，意为大学的宗旨在于弘扬光明正大的品德，在于使人弃旧图新，达到最完善的境界。 大医精诚：出自唐朝孙思邈所著《备急千金要方》，我国著名医学家裘法祖先生对大医精诚最精辟的解释是：“精于医术，诚于品德”。 “大学至善，大医精诚”作为校训，是学院历史和文化的深厚积淀，是广大师生共同遵守的基本道德准则与行为规范，借此激励全院师生在学问和医道上达到“至善”和“精诚”的境界。
251	HeiLongJiang University of Technology	修德修能、成人成事	MOR0; PROF; MOR1; PROF	中华民族自古以来始终秉承“自天子以至于庶人，皆以修身为本”的训导。“修身”儒家释为修德和修智（能）。学校是育人的圣地，以德才兼备之师培养品学兼优之生应是矢志不渝的追求。 修，即学习、培养、锻炼；修德是道德的养成，修能是本领的培育；修德修能的指归是成人成事。修德修能是成人成事的前提，成人成事是修德修能的结果；不断完善自我的过程就是修德修能的过程，美好人生的目标就是成人成事。 教师修德，即修“涵养”“博爱”“烛照”之品格；教师修能，即修“传道”“授业”“解惑”之本领；教师成人，即成为德高为范、学高为师之人；教师成事，就是成就为国家培养英才之事。 学生修德，即修“感恩”“诚信”“担当”之情志；学生修能，即修“独立思考”“自主创新”“躬身实践”之能力；学生成人，即成为德、智、体等全面发展的社会主义事业的建设者和接班人；学生成事，就是实现人生价值、成就人生梦想。 修德修能、成人成事，集求真、求善、…
252	Heilongjiang Institute of Technology	明德求真、知行合一	MOR0; SCH; ACT	“明德求真”源自我国传统教育思想精华的四书《大学》。《大学》开篇宗义就指出：“大学之道，在明明德，在亲民，在止于至善”。此处的“大学”就是指君子的行动守则，“明德”之意则为弘扬光明正大的品德，使人弃旧图新，达到最完善的境界。那么作为一个有品位的黑龙江工程学院人，在行事准则上就应该秉承校训，以德服人，以德律己。只有在思想素质上达到一个高度，才能真正做到在学习中持之以恒，追求真知。 “品位”是一个人内涵的体现，而盲目追求所谓“高品位”的人则是最偏离“品位”真实涵义的人。“品位”之初就应该是德行的至善修养，而德行则体现在日常生活学习中的点点滴滴。想要成为真正有品位的工程学子，首先在道德修养上就应该做到严己律人，树立正确的人生观、价值观，从身边的小事做起，在不断追寻中成就由量到质的转变，为构建和谐的工程校园氛围做出应有的贡献。在学习上则要发挥执著探索的精神，端正自己的学习态度，把“求真知”视为一…
253	Heihe University	明德、笃学、励志、求真	MOR0; SCH; WILL; SCH	“明德”摘自孔子《大学》开篇:“大学之道,在明明德,在亲民,在止于至善。”“明德”即彰显伦理、完善品德,意为倡导师生通过学习和实践净化自己的德行,显示美好的德性,达到内心清明高尚的境界,形成票高的品德和完备的人格。 “笃学”即学习要专心致志,要志于学、专于学、厚于学,力戒浮躁虚荣,在知识与技能上实现厚积厚载,做到学有所依、学有所成、学有所用。 “励志”即倡导和激励师生要有自强不息、奋发有为的理想信念和立志成才、愈挫弥坚的精神品质。 “求真”即探索真理、博学求知,倡导师生养成严谨勤奋的治学态度和求是创新的科学精神。 “明德、笃学、励志、求真”的八字校训引经据典、寓意深远,具有丰厚的文化底蕴和深刻的科学内涌,八个字、四组词彼此联系、互为因果,是黑河学院人做人做事的共同志向和践行目标,充分体现了黑河学院以人为本的办学理念和人才培养目标。
254	Harbin Conservatory of music	致乐崇德	PROF; MOR0	学院依托哈尔滨对俄地缘优势及音乐文化传统，按照国际化、高水平的办学定位，明确精英式人才培养模式，确立“高位起步、精英培养、尖端打造、特色发展”的办学理念，凝练“致乐崇德”的院训，形成“攻坚克难、奋发进取、甘于奉献、敢创新路”的建院精神，致力于培养“品德优良、专业优秀、气质优雅”的高水平音乐人才，建设“特色鲜明、国内一流、国际知名”的高等音乐学府。
255	Fudan University	博学而笃志，切问而近思。	SCH; WILL; SCH; REAS	1915年，为纪念复旦创校十周年，时任校长李登辉组织国文系教授商议并最终由马相伯老校长选定复旦校训：“博学而笃志，切问而近思。”校训出自《论语·子张》，子夏曰：“博学而笃志，切问而近思，仁在其中矣。”图为马相伯题写的校训, 刊于1935年《三十年的复旦》。
256	TongJi University	同舟共济	MOR2	“同舟共济”这个成语来自春秋时期军事家、政治家孙武所著的《孙子兵法》。《孙子 九地》中写道：“夫吴人与越人相恶也，当其同舟而济，遇风，其相救也，如左右手。”自此，“同舟共济”遂成为表示 力同心、共渡难关的经典成语。“同舟共济”昭示着同心协力、攻坚克难、止于至善的大学理想，是同济大学自身办学历程和同济人家国情怀的生动写照。
257	Shanghai Jiao Tong University	饮水思源，爱国荣校	MOR3; MOR3	饮水思源，简单的解释就是指喝水的时候要记着水是从哪儿来的，比喻人不能忘本。北周的庾信《徵调曲》中有“落其实者思其树，饮其流者怀其源”之句；宋时的宗礼《大鉴禅师殿记》中有“饮水知源，自觉自悟，师岂远哉”之句。交通大学的“饮水思源”传统，经查，最早出现的当属1926年学校30周年校庆时，在所举行的各项庆典仪式中，有建立最早的师范班校友捐建的“自流井”落成仪式，沈叔逵代表校友致词，说明开凿该井的意义是“饮水思源”。1933年4月，学校37周年校庆时，又有1930届毕业校友捐资于执信西斋前建造喷水池，喷水池中为一石碑，上刻“饮水思源”，石碑上置放铁铸的交大校徽。这一建筑物后在数十年的风雨中损毁，1979年又由学校在原址原样重新恢复。长期以来，“饮水思源”碑已成为交通大学的标志性建筑物。著名学者杨福家先生曾对交大的这一校训赞赏有加：“上海交大的校训也体现了非常深刻的道德含义：‘饮水思源，爱国荣校’…
258	East China University of Science and Technology	勤奋求实，励志明德	DIL; ACT; WILL; MOR0	半个多世纪来，华东理工大学围绕办怎样的大学、如何办大学等问题进行了系统深入的思考和不懈的实践探索，逐步形成了“勤奋求实，励志明德”的校训。 “勤奋求实”是我校长期坚持的治学方略，也是我校一脉相承的办学传统。学校从上海东北隅江湾镇的简陋校舍中起步，后迁至市区西南梅陇路现址，1960年成为高教部直属全国重点大学。1965年党中央、国务院决定在内地三线建设四所重要大学的分校，我校名列其中，在四川分校建设历程中，形成了艰苦奋斗、顽强拼搏、开拓创新的“黄陂岭精神”。学校从简陋校舍办学起步，到“652工程”建设，再到20世纪80年代的改革创新、90年代的跨越式发展、21世纪的内涵充实和外延拓展，学校形成了“注重过程、勤奋求实”的办学思想和作风，以及“传承拓展、励志图新”的办学思路，实现了由单科性学院向多科性、研究型大学的转型，完成了由化工单一学科向过程工程学科群的拓展，以及向人文社会学科群的延伸。 …
259	University of Shanghai for Science and Technology	信义勤爱、思学志远	MOR1; MOR1; DIL; MOR1; REAS; SCH; WILL	一所大学的校训，往往是这所大学的“育人之纲”与“精神之气”，是师生的“价值尺度”与“精神导向”。从这个意义上来讲，对大学校训中蕴含精神的解读与丰富，是培育高校青年学子树立社会主义核心价值观的重要抓手。 上海理工大学是一所具有108年历史的高校，其“信义勤爱，思学志远”的校训，不仅是中华民族优秀传统文化的传承，更是社会主义核心价值观内涵的多维阐释。“信”“义”“勤”“爱”是中华优秀传统文化中守诚信、崇正义、尚敬业、讲仁爱的思想精华，也是学校师生对“信崇真理、义重仁厚、勤学实干、爱国敬业”的精神传承。“思”与“学”为立校之本，体现了学校教育本质的回归，对社会主义核心价值观的恪守。“志”与“远”则意在立志、崇远，重在培育青年学子的学识抱负。校训从“为人”的角度倡导“信义勤爱”，是要让师生首先意识到自己是一个社会人，要勇于担负起各方面的社会责任。进而从“为学”的角度倡导“思学志远”，是希望师生唯…
260	Shanghai Maritime University	忠信笃敬	MOR2; ACT	“忠信笃敬”校训根植于中国传统文化的土壤，源于《论语·卫灵公》篇：“子张问行，子曰：言忠信，行笃敬，虽蛮貊之邦，行矣。言不忠信，行不笃敬，虽州里，行乎哉？”。意为：“子张问孔子：怎样才能使自己到处都能行得通。孔子说：说话要忠实守信，行为厚道而严肃，即使到了外邦，也能够行得通。说话欺诈虚伪，行为轻浮狂妄，就是在本乡本土也行不通。”“言忠信”、“行笃敬”是一个人立身行事的内在要求，也蕴涵了吴淞商船的精神追求和办学理念。王伯群校长题“忠信笃敬”为校训，目的在于从“言”和“行”两个方面，“寄学生以品学兼优的希望，以求世界影响”。 根据2015年最新公布的《上海海事大学章程》，上海海事大学以“忠信笃敬”为校训，学校将继承吴淞商船的优良传统，以“兴学育人、强海兴邦”为使命，弘扬“开拓进取、求实创新”的校风，坚持“海纳百川、追求卓越”的校园文化，坚持“视教育质量为生命，严谨治学”的管理理念，以航运、物…
261	Donghua University	崇德博学、砺志尚实	MOR0; SCH; WILL; ACT	激励师生修身立德、博学专攻，砥心励志、求真求新。 崇德。“崇”意即推崇提倡，“德”指道德、德行。“崇德”指崇尚有德之人、推崇高尚的德行。“崇德”既是为人之本，也是中国历代知识分子的精神追求所在。语出老子《道德经》“修之于身，其德乃真”、《尚书・周书・武成》“惇信明义，崇德报功，垂拱而天下治”；又见《礼记・王制》“上贤以崇德”。 博学。“博学”指广义的学习。语出《论语・子张》“博学而笃志，切问而近思”、《论语・雍也》“君子博学于文，约之以礼”、《礼记・中庸》“博学之，审问之，慎思之，明辨之，笃行之”；又见《荀子・劝学》“君子博学而日参省乎己，则知明而行无过矣”。 砺志。“砺”，意即“磨冶”“磨炼”。“砺志”指在艰苦的环境中磨炼意志，成就事业。语出《尚书・费誓》“备乃弓矢，锻乃戈矛，砺乃锋刃，无敢不善”。 尚实。“尚实”，指脚踏实地、朴实无华的作风。语出三国时期曹丕《典论・论文》“奏议宜雅，…
262	Shanghai University of Electric Power	爱国、勤学、务实、致用	MOR3; SCH; ACT; ACT	学校的校训是“爱国、勤学、务实、奋进”，学校坚持“立足电力、立足应用、立足一线”的办学方针，树立“务实致用，明理致远”的办学理念。学校坚持深化改革，加快内涵建设，办学规模、办学层次、办学质量和国际影响力稳步提升，逐步发展成为以工为主，兼有理、管、经、文等学科，主干学科能源电力特色鲜明、多学科协调发展的高等学校。
263	Shanghai Institute of Technology	明德、明学、明事	MOR0; SCH; ACT	“明”在此作动词，其义为“清楚，懂得，知晓，明白”等，引申为“学会”（通过学习而掌握）。 “德”，指人们共同生活及行为的规范，如公德、道德准则；又指个人内在的优良品质，如美德、品德；还指德行，即有道德的行为。中国文化中，“德”被认为立身之本。 “明德”，即通过教育，使学生学会怎样做人，怎样做有德之人。儒家经典《大学》开宗明义：“大学之道，在明明德，在亲民，在止于至善。”注重品德修养，诚实守信，是现代社会的通行证，品德高尚是首先要达到的目标。 关于“明学” “学”，指分门别类的系统知识，如哲学、数学、化学等；又指个人所掌握的知识，如学问、学术、学识、博学多才等。“学，识也。”（《广雅》）。 “明学”，就是通过教育，使学生学会怎样治学。“明学”更加强调对学问的追求，强调使学生掌握做学问的方法，强调学以致用。 关于“明事” “事”，指自然界和社会中的现象与活动，如事情、事件、事业等；又指职业，…
264	Shanghai University of Medicine & Health Sciences	厚德至善、健行康民	MOR0; MOR1; ACT; MOR3	厚德至善：立德树人、以德为先、健全人格、求真向善。寓意学校以培养具有健全人格和健康心理的高素质医学人才为根本任务，倡导仁爱奉献、救死扶伤，勉励教师学高为师、身正为范，勉励学子志向高远、恪守医德。 健行康民：精技善能、自强不息、服务人民、促进健康。寓意学校以培养具有精湛技能、善于解决实际问题的优秀应用型人才为使命，倡导知行合一、勇于实践，勉励师生以维护健康、呵护生命为己任，尽其所能服务于人类的健康事业。
265	Shanghai Ocean University	勤朴忠实	DIL; MOR1; MOR3	上海海洋大学“勤朴忠实”校训，在中国近代“实业救国”影响下。我校创校之初旨还在于增强国家海防功能，张謇先生所言，渔权所致海权所在。为维护捍卫国家海权而发挥作用。故此，创校先贤充满着深厚的家国情怀。 4月7日，在上海市高校思想政治工作会议上，上海市委书记韩正在报告中说“……上海海洋大学‘勤朴忠实’的校训，都是和社会主义核心价值观相一致的……”。“勤朴忠实”，历经一百多年，在上海海洋大学得到不断的传承和弘扬，也成为生动的思想政治教育载体，在一代代海大人身上生根发芽，成为一个个海大人显著的标签。 百年校训塑造思想政治教育传统 上海海洋大学“勤朴忠实”校训，在中国近代“实业救国”影响下，发轫于100多年前的1914年9月1日，发扬于新中国成立之初，传承于改革开放与社会主义现代化建设进程中。 学校创办人张謇，在近代教育史上率先提倡校训，推崇“勤”“俭”“诚”“信”等伦理规范。1903年，张謇为通州…
266	Shanghai University of Traditional Chinese Medicine	勤奋、仁爱、求实、创新	DIL; MOR1; ACT; INNO	1988年9月16日，学校发布《关于颁发校风的决定》：“经校党政联席会议确定，以‘勤奋、仁爱、求实、创新’为学校校风”。 2012年初，全校师生对校训进行了讨论，对校训涵义进一步充实：勤奋——严谨治学，精育英才，刻苦学习，潜心研究，甘于寂寞，矢志拼搏；仁爱——大医精诚，救死扶伤，服务社会，造福人民，包容宽厚，大气谦和；求实——立足中医，尊重科学，脚踏实地，敢于担当，恪守诚信，繁荣学术；创新——志存高远，追求卓越，面向未来，弘扬中医，敢为人先，再创辉煌。
267	East China Normal University	求实创造、为人师表	ACT; INNO; PROF	学校前身在上海高校中最早使用校训 华东师范大学是在大夏大学、光华大学和圣约翰大学等基础上建设发展起来的，其中圣约翰大学是上海最早使用校训的大学。从1879年成立起，“LightandTruth”光明和真理就作为校训被镌刻在校徽上。华东师大档案馆馆长汤涛说，后来圣约翰大学有了中文校训——“学而不思则罔，思而不学则殆”。 我国师范类高校的校训粗看颇为相似，如北师大、东北师大和华南师大的校训中都有“学为人师”，而华中师大和华南师大的校训当中又都有“求实创新”。 在从1951年正式建校后的40年间，和国内大部分高校一样，华东师范大学并未认识到确定校训的必要性。据时任华东师大党委书记徐豫龙回忆：1990年，在华东师大即将建校满40周年之际，时任校长袁运开在一次校长办公会议上提出华东师大的校训为“求实创新，为人师表”，而张瑞琨副校长觉得“求实创造，为人师表”更好，因为“创造”与“创新”相比，更能体现…
268	Shanghai Normal University	厚德、博学、求是、笃行	MOR0; SCH; SCH; ACT	“厚德”一词,源出于《易经》。《易·坤》说“君子以厚德载物”。还说:“坤厚载物,德合无疆。”把“厚”和“德”联系在一起,谓“厚”“德”者可以“载”。白话文的意思就是,有道德的人,才能承载天下的重任,担负起宏大的事业。这里的“厚”字,是使动词,与“德”搭配,有“使道德充裕、厚实”的意思。古人非常重视“德”，他们把“德”，看成是和天地乾坤一样的大事情。我们今天提倡“文明修身”,“德”,就是其中的核心内涵。这里的“德”,包含了许多内容,包括“诚”、“信”、一个人的思想境界、品格、志向、趣味等等。大学承担着培养全社会精英“芯片”的重要任务,所以,特别要强调一个“德”字。做人,离不开“德”;身正为师,德高望重。无论是老师还是学生,“厚”与“德”都应该视为“修身”最重要的一环。 “博学”一词,源出于孔子的《论语》。《论语·雍也》篇说：“君子博学于文,约之以礼。”对“博学”,古人也是非常重视的。学生到…
269	Shanghai International Studies University	格高志远、学贯中外	WILL; SCH	2007年1月，上海外国语大学教职工代表大会和工会会员代表大会上投票确定了上外的新校训为“格高志远 学贯中外”。 “格高志远”出自《礼心•缁衣》中“言有物而行有格也，是以生则不可夺志，死则不可夺名”，以及（南朝）梁萧统编著的《文选》 “气高志远，似若无敌。” “学贯中外”源于“学贯中西”，以“外”代替“西”，无论在地理上，还是在文化上都具有更大的包融性。 新校训“格高志远 学贯中外”是上外大学精神的凝练。近年来，上海外国语大学围绕培育上外精神，构建和谐校园提出了可以简称为“四三二一”的新发展战略（以加强学风、政风、作风和会风建设为政治保障，以着力打造外语类专业、复合型专业和国际化办学三项核心竞争力为中心，以全力推进“学科强校”和“人才强校”战略为支撑，以知识创新和培养高素质、复合型、国际化的合格建设者和可靠接班人为目标）；明确了上外在新时期的办学定位是建设高水平多科性国际化研究教学型外国…
270	Shanghai University of Finance and Economics	厚德博学、经济匡时	MOR0; SCH; PROF	巍巍乎，金陵商科至沪申上财，易地延展不止；荡荡乎，分并撤转升三落三起，百年生生不息。沧桑砥砺，续命传薪，树我师生之魂魄：“厚德博学①，经济匡时②”，聚师生之仁智勇用，是为校训。 树木不易，树人其难。崇师德学德，终见③仁德，育公德私德，必成君子之德；淹贯④旧学今学，覃研⑤国学西学，财经人文旨在修身致用。经世济民，报效社稷，行平运之道乐为人先；匡时扶正，匹夫有责，行逆运之道不甘落后⑥。厚德者仁，博学者智，经济者用，匡时者勇。惟此，我上财师生修己以敬以安百姓，行仁智勇君子之道惟在大用，以为己任。 丛林商海，黾黾孳孳⑦；科教文服，相得益彰，联跗并萼⑧，百年千秋。是惟厚德博学，可以经济匡时。⑨①厚德语出《周易》：“君子以厚德载物”；博学语出《论语·子张》：“博学而笃志，切问而近思，仁在其中矣。” ②1934年，著名学者马寅初为上财人题词：“经济匡时”，寄望上财人志存高远，担负起天下兴亡的重任。 ③…
271	Shanghai University of International Business and Economics	诚信、宽容、博学、务实	MOR1; INCL; SCH; ACT	诚信是一种操守，人以诚信立身； 宽容是一种修养，人以宽容待人； 博学是一种境界，人以博学正业； 务实是一种精神，人以务实做事。 “诚信、宽容、博学、务实”涵盖了“立德、修身、治学、做事”四个方面，既反映了学校的办学传统，也展示了学校的精神面貌；既源于中华民族优秀传统文化，也与社会主义核心价值观一脉相承。诚实守信、宽厚包容、博采笃学、务本求实,是中华优秀传统文化的思想精华。
272	Shanghai Customs College	致知、力行、慎独、忠诚	SCH; ACT; WILL; MOR3	致知：对事物的完善的理解； 力行：努力实践，竭力而行； 慎独：树立理想和抱负，不断提高自己； 忠诚：真心诚意，绝无二心。
273	East China University of Political Science and Law	笃行致知,明德崇法	ACT; SCH; MOR0; PROF	出典： 笃行——“博学之，审问之，慎思之，明辨之，笃行之。”（《礼记·中庸》） 笃行，表示要以自己的实际行动，切实追求，注重实践。 致知——“古之欲明明德于天下者，先治其国；欲治其国者，先齐其家；欲齐其家者，先修其身；欲修其身者，先正其心；欲正其心者，先诚其意；欲诚其意者，先致其知；致知在格物。物格而后知至，知至而后意诚，意诚而后心正，心正而后身修，身修而后家齐，家齐而后国治，国治而后天下平。” （《礼记·大学》） 致知，表示寻求知识，探求真理。 明德——“黍稷非馨，明德惟馨。”（《尚书·君陈》） ——“大学之道，在明明德。”（《礼记·大学》） 明德，表示追求完美的德性。 崇法——“上贤以崇德，简不肖以绌恶。”（《礼记·王制》） 崇，表示尊敬、推重。 法，法律，法治。表示我们学校主要的专业。 崇法，表示崇尚法律，追求法治。 校训含义： 笃行致知，其含义是以自己踏实的态度，认真实践，积极探…
274	Shanghai University of Sport	身心一统,兼蓄竞攀	PROF	上海体育学院始建于一九五二年十一月，为新中国第一所体育高等学府。首任院长吴蕴瑞先生潜心探究先进体育学术理念，奉体育为人之完整教育，循“身心一统、德技相长、文理兼修、服务社会”之 思想，倡“严谨笃实、悉心治教、为人师表、教学相长”之教风。 学校初创，诸事艰辛，然师生莫不竞相共勉，以苦为甘，一时从教治学靡不斐然向风，凡所举措，屡开国内体育教育新风。 新世纪国昌民阜，树现代体育大学之目标，遵“身心一统，兼蓄竞攀”之校训，夯基础之实、重技能之强，厚积薄发，育复合-应用型人才。 治校者当励精图治，与时俱进，塑各尽其才人文环境。教师当学高为师，身正垂范，以时代精神践行师职。学生当慎思明辨，砥节砺行，怀广远理想服务社会。上下一体，万方同心，绍续先贤魂脉，身肩时代重任，薪传体育学术，尽展竞攀气度，彰显更快、更高、更强之奥林匹克精神，向未来之势，耀民族之光。
275	Shanghai Conservatory of Music	和毅庄诚	INCL; DIL; PROF; MOR1	上音的校训‘和毅庄诚’，寓意和谐、美好，刚毅、正直，端庄、持重，忠诚、守信，体现了上音人对尽善尽美的艺术追求和推崇的艺术教育理念。这一校训不仅指导着学校的教学理念和育人目标，也体现了学校对培养德艺双馨、红专兼备、国际视野、全面发展的拔尖创新艺术人才的追求。
276	Shanghai Theatre Academy	至善至美	MOR1; PROF	培养人才的目标，我以为，首先应该注重人格的陶铸，使每个戏剧青年都有健全的人格，是一个堂堂正正的“人”——爱民族，爱国家，辨是非，有情操的人。然后，他才有可能成为一个伟大的艺术家，所以本校的训练的体系，不仅是授予学生戏剧的专门知识与技能，更重要的还是训练他们如何做人。
277	Shanghai University	自强不息，道济天下	WILL; MOR3	上海大学秉承“自强不息”、“先天下之忧而忧，后天下之乐而乐”的校训和“求实创新”的校风，努力建设自强不息、追求卓越、勇于创新、乐于奉献、兼容并蓄、和谐向上的大学文化，以国际知名、国内一流、特色鲜明的综合性研究型大学为建设目标，面向国家和区域经济社会发展需求，培养全面发展的人。 1994年，上海工业大学、上海科技大学、 上海科技高等专科学校和原上海大学合并组建为新的上海大学。钱伟长担任首任校长。 原上海大学的校训是：自强不息。这四个字出自《周易》“天行健，君子以自强不息”，意指君子处世，就应该像天那样高大刚毅而自强不息，自我力求进步，永不停止。 钱伟长校长在1994年5月27日的校报专刊上发表的文章，强调要把上海大学建设成国内外有影响的一流大学。前半生科学救国，后半生教育兴国，他在上海大学原有的“自强不息”校训后面又加了一句话： "先天下之忧而忧， 后天下之乐而乐。” 这句话出自范仲淹《岳…
278	Shanghai Police College	托起公安工作明天	PROF	学院校训是“托起公安工作明天”，体现了公安教育在公安工作中的先导性、基础性和全局性的地位与作用，映射出学院培养人民警察的神圣职责与使命，寓意教职工从教育人的理想与追求，蕴含学生勤学苦练的信念与志向。
279	Shanghai University of Engineering Science	勤奋、求是、创新、奉献	DIL; SCH; INNO; MOR3	刚刚迈过四十年韶华的上海工程技术大学多年来始终秉承“勤奋、求是、创新、奉献”的校训，坚持以服务国家战略需求和地方经济社会发展为己任，一代代工程大人在谋发展的道路上奋勇前进！经历了四十载历史洗礼与持续的快速发展，如今的工程大开始踏上建设国内一流的高水平现代化工程应用型特色大学的新征途。潜心治学、躬行不辍，积极探索未知领地；展翅颉颃、声名远播，开拓全球视野与国际合作；产学交融、知能并重，弘扬中华文化与文明之颂。
280	Shanghai Lixin University of Accounting and Finance	立信	MOR1	立信”二字取自《论语·颜渊篇》“民无信不立”，本意是如果统治者失掉了老百姓的信任，国家就失去了存在的根基。 潘序伦先生认为，会计从业者最重要的职业道德准则是诚信，“立信”两字具有信誉第一以及努力奋进等积极意义。他在创建学校时，经反复推敲比较，最后采用“立信”两字为校名。学校曾多年以“立信”两字为校训。此后潘老对“立信”校训又不断加以阐释、丰富扩展其内涵，提出了“信以立志，信以守身，信以处事，信以待人，毋忘立信，当必有成”24字。立信校训激励了一代又一代青年学子努力成为国家经济建设的栋梁之才。 学校精神。 ------------------------ 立诚明德 经世致用 释义:《礼记·大学》：“大学之道在明明德”。儒家认为，教育可以使得被后天物质利害蒙蔽压抑的明德显露出来，因此“大学之道在明明德”。而“明德”的前提和要求是“立诚”，即绝假纯真，才能形成真正的“明德”。 “经世致用”起源…
281	Shanghai DianJi University	明德至善、博学笃行	MOR0; MOR1; SCH; ACT	“明德至善”出自《礼记·大学》：“大学之道，在明明德，在亲民，在止于至善”，意指大学的根本宗旨，首先在于彰显人性固有的内在道德之光，然后亲近人民并竭尽全力为之服务，最后则要通过个人修身与社会实践，使社会和个人都臻于和谐圆满的至善至美的理想境界。是做人、做学问的理想途径，也是中国文化人精神追求的最高的目标。 “博学笃行”出自《礼记·中庸》：“博学之、审问之、慎思之、明辨之、笃行之”，意为广博学习、深察慎思、追求真知、切实实践，是儒家先贤做学问的方法论。 “明德至善”提出了终极目标，“博学笃行”为实现这个目标提供了具体的实施方法。
282	Shanghai University of Political Science and Law	刻苦、求实、开拓、创新	DIL; ACT; INNO; INNO	校训是一个学校的灵魂，集中反映了办学宗旨和历史传统，代表着校园文化和教育理念。“刻苦求实、开拓创新”的校训精神，承载着老一辈上政人立足现实、艰苦奋斗、自强不息的创业精神。37年来，校训精神薪火传承，继往开来，激励着一代又一代上政人不忘初心、接续奋斗、奋勇前进。 学校以“刻苦、求实、开拓、创新”为校训，秉持“立足政法、服务上海、面向全国、放眼世界”的办学宗旨，依托政法行业支撑，创新教学体制机制，着力培养实践能力与社会适应能力强的高素质应用型人才。以内涵建设为着力点，以教育质量为生命线，错位竞争，科学发展，办学实力不断增强，办学特色逐渐彰显，社会影响力显著提升，为推进国家及地方法治建设和经济社会发展作出了自己的贡献。
283	Shanghai Polytechnic University	厚生、厚德、厚技	MOR3; MOR0; PROF	厚：重视，推崇。厚生：厚民之生。厚德：《周易》“地势坤，君子以厚德载物”。 “厚生”讲共性，体现以人为本、以学生为本的立校使命，全员育人、全程育人、全方位育人。 “厚德”是立德树人，每位学生都必须学会做人做事做学问。每位教师都必须树立育人为本、德育为先的理念，为党育人，为国育才。 “厚技”讲个性，讲二工大的办学特长，从应用性、技术技能型、终身化的角度，练就过硬本领，服务国家、服务社会。
284	Shanghai Business School	厚德博学、经世济民	MOR0; SCH; MOR3	学校的办学理念：以商立校，应用为本。 学校发展目标定位：建成与上海城市功能相适应，与上海现代服务业发展需求相匹配，服务上海商贸流通业发展的特色鲜明的应用性教学型大学。 2014年9月22日下午，党办、校办在奉浦校区综合楼17楼会议室组织召开了部门校训研讨会，两办主任侯立玉主持会议。 侯立玉主任通过列举其他高校各具特色的校训，向大家介绍了校训的提出过程和独特意义，希望同志们结合对于大学精神、学校定位、成长发展等问题的思考，深刻理解校训的内涵，多方解读校训的深意，把对校训的理解和解读贯彻到自己工作和学习中去。 与会人员畅所欲言，各抒己见，结合上海同类财经院校的发展和学校“以商立校 应用为本”的办学理念，围绕“和谐 诚信 求实 创新”和“厚德博学 经世济民”新老校训的内涵解释展开了讨论。 侯立玉在总结时说，在迎接教育部本科教学工作合格评估之际，要进一步提炼和弘扬上商精神和我校办学特色，校训一旦…
285	ShanghaiTech University	立志、成才、报国、裕民	WILL; PROF; MOR3; MOR3	学校着重培养学生“立志、成才、报国、裕民”的社会责任感，培养从事科学发现、高技术创新与新兴产业创业的拔尖人才。本科生培养遵循“宽口径、厚基础、小规模、国际化”原则，突出通识教育、专业教育、创新创业教育。研究生培养注重结合重大科学设施、重大科研项目和重点产业，立足学校定位和特色培养国家战略急需人才。
286	Nanjing University	诚朴雄伟、励学敦行	MOR1; MOR1; SCH; ACT	“诚朴雄伟，励学敦行”八字校训，不仅言简意赅，琅琅上口，易于传记，而且端庄大气，寓意深刻，富有哲理。“诚朴雄伟”原是中央大学时期的校训，“励学敦行”是我从中国古代前贤名句中选取而来。“励学”二字在古文中常有出现，宋真宗写过一首名为《励学篇》的诗，劝勉人勤奋学习。“敦行”见于《礼记·曲礼上》：“博闻强识而让，敦善行而不怠，谓之君子。”将“诚朴雄伟”与“励学敦行”两句合为一起作为今日南京大学的校训，既反映了我校的优良传统与特色，又能体现学校办学的理想追求和实现途径。八字校训既各自独立成意，各有侧重，又相互联系，浑然一体，涵盖了教育思想、科学精神、品格修养等各个方面。 “诚朴”是南大传统精神中最本色的东西，我校校史上大多数校训、校风中都有这两个字出现。“诚朴”是诚恳朴实的意思，其中“诚”是核心，是根本。“诚”是维系人类社会的最高道德规范，也是中国传统文化的精神内核。诚者，真也，“诚”的对立面是…
287	Soochow University	养天地正气,法古今完人	MOR3; WILL	一个多世纪以来，一代代苏大人始终秉承“养天地正气，法古今完人”之校训，坚守学术至上、学以致用，倡导自由开放、包容并蓄、追求卓越，坚持博学笃行、止于至善，致力于培育兼具“自由之精神、卓越之能力、独立之人格、社会之责任”的模范公民。 苏州大学的主要前身之一是创建于1900年的东吴大学。作为东南名府,东吴大学在半个世纪的办学历程中,以“养天地正气、法古今完人”的校训,注重学用并举,强调德术兼备,培养了大批贡献卓著的仁人志士。 人要有追求，要有俯仰无愧天地的正气；要以勤奋的努力，实现符合时代要求的人生目标。
288	Southeast University	止于至善	MOR1	“止于至善”出自《礼记·大学》“大学之道，在明明德，在亲民，在止于至善。”意为以止于至善为目标或原则，不断地革新和完善。旨在激励东南大学师生员工完善自我以立德，服务人类以立业，坚持真理以立信，追求卓越以立境。
289	Nanjing University of Aeronautics and Astronautics	智周万物，道济天下	SCH; MOR3	2003年3月6日，我校召开今年第三次校长办公会。经讨论，确定“智周万物，道济天下”作为南航校训。 “智周万物，道济天下”，语出《周易·系辞上》中的“知周乎万物而道济天下”。南京航空航天大学党委书记崔锐捷说：“‘智周万物’是指探索和发现真理，追求大智慧，达到周知万物的学术境界；’道济天下’，是指掌握和运用规律，践行大道德，实现经世济民的远大理想。这八字校训，既是南航学子追求真理、矢志创新的真实写照，也是南航人航空报国、服务社会的精神源泉。”
290	Nanjing University of Science and Technology	进德修业,志道鼎新	MOR0; SCH; SCH	“进德修业”语出《周易·乾》：“子曰：君子进德修业，忠信，所以进德也，修辞立其诚，所以居业也。”“进德”，意为增进德行，体现学校崇尚“立德树人”“育人为本”“以德为先”，将提高师生道德修养作为其立身治世的前提与目标。“修业”，意为修习学业、成就事业，体现学校办学育人的境界，即：教师诲人不倦，勤业、精业、乐业；学生孜孜以求，创新、创业、创优。 “志道鼎新”，取意“探究道理，创造新知”。“志道”语出《论语·述而》“志于道、据于德、依于仁、游于艺”，蕴含着探寻事物的本质规律、追求科学真理之意，勉励师生把探索“道”作为孜孜以求的目标。鼎，树立之意，语出《周易·杂卦》：“革，去故也，鼎，取新也。”鼎新，引申为发现与创造新思维、新知识。
291	Jiangsu University of Science and Technology	笃学明德、经世致用	SCH; MOR0; MOR3; ACT	“笃学明德 经世致用”，体现的是学校的办学理念和治学传统，体现的是学校的人才培养标准和特色，体现的是学校倡导并遵循的价值追求和教育宗旨。 笃学：即专心致志地学习。其典故出自《三国志·吴志·孙瑜传》：“济阳人马普笃学好古，瑜厚礼之”。“笃学”要求学生志于学，专于学，厚于学，在知识与技能上实现厚积厚载。志于学是一个学习志向问题，当代大学生要以国富民强为己任，立志为国家的科技振兴、经济发展、社会进步及个人的自立自强而读书。专于学是一个学习态度问题，在科学知识面前来不得半点虚伪和骄傲，要专心致志、老老实实、勤勤恳恳地学，切戒浮躁与虚伪。厚于学是一个学业成就问题，要全面提高自己的职业应用知识与技能，实现厚积厚载，以深厚的功底与实力进入社会、服务社会。 明德：语出《礼记·大学》。《大学》一开篇就提出了“大学之道，在明明德，在亲民，在止于至善”。这里的“明”即是“使彰明”，这里的“明德”，即是弘扬光大…
292	China University of Mining and Technology	崇德尚学	MOR0; SCH	大学的根本任务是立德树人，必须坚持以德为先、以学为本，自觉做到“尊德性而道问学”【注1】。我校以“崇德尚学”为校训，遵循了党的教育方针与根本要求，体现了大学教育的本质内涵与核心价值，包含着中华优秀文化的丰富意蕴，全校师生员工皆应信守奉行之。 注释： 【注1】 《礼记·中庸》。
293	Nanjing Tech University	明德、厚学、沉毅、笃行	MOR0; SCH; DIL; ACT	明德:《大学》开篇：“大学之道，在明明德。”学以人为本，人以德为尚；知识之道，重在人文，为人之道，重在人品。《国语·鲁语》有言：“不厚其栋，不能任重；重莫如国，德莫如栋。” 厚学:非学无以广才，立身以立学为先。学问之道，在于多思多问，在于扎扎实实，在于兼收并蓄，在于融会贯通。 沉毅:天行健，君子以自强不息。砥砺意志，坚忍不拔；直面挫折，百折不挠；静穆刚毅，沉着勇敢。 笃行:礼记·中庸》有言：“博学之，审问之，明辨之，笃行之。”注重实践，知行合一。理论联系实际，言行表里如一。慎思笃行，砥砺前行。 校训作为学校发展方向的标尺，它承载了学校的办学理念，体现了学校的办学原则与目标。在育人方面起着不可或缺作用的同时，它又是一种文化，流传在南工大人点点滴滴的日常之中。 校训的意义刻在每个南工大人的心里，更体现在每个南工大人的行动上。 我们一直奔走在奋进与探索的路上，头顶同一片蓝天的我们，仰望星空追逐…
294	Changzhou University	责任	MOR2	“责任”蕴含敬业、务实、担当、勤奋之意，这是常州大学的一贯风格。 “责任”蕴含讲求可行性、可靠性、有效性、可持续性之意，这是工程科学和工程实践特具的属性，因而也是高等工程教育必须具备并且应在育人过程中着力培养的品格。 “责任”蕴含既对自我负责，又对他人负责，更对社会负责之意和既对历史负责，又对现在负责，更对将来负责之意，这是现代社会栋梁之材的必备品德。 以“责任”为校训，表明常州大学师生员工要这样要求自己：既要有脚踏实地的敬业精神，又要有志存高远的创新精神；既要对自己的人生负责，又要对社会和时代负责；用高度的责任心做人、做事、学习和生活。
295	Nanjing University of Posts and Telecommunications	厚德、弘毅、求是、笃行	MOR0; MOR1; SCH; ACT	“厚德”出自《易经•坤卦》，意指君子应增厚美德，容载万物。以此为校训意在强调 “育人为本、德育为先”的教育理念；同时期望全校师生以高尚的道德立身。 “弘毅”，出自《论语•泰伯》：“士不可以不弘毅，任重而道远。”意为：读书人不可以不心胸宽广、意志坚强。“弘毅”，寓意师生在学习、生活和工作中不断磨励自己的毅力， 意志坚强，心理素质过硬，能够经得起各种困难和挫折的考验。 “求是”出自《汉书•河间献王传》，意指科学地研究客观事物的规律，实实在在地办事。“求是”是治校和治学精神的具体体现，表现为奋斗精神、牺牲精神、爱国精神、革命精神和开拓创新精神。 用求是的精神培养勇于求索的人，是大学的责任。 “笃行”出自《礼记•中庸》，是为学的最后阶段，就是既然学有所得，就要努力践行所学，使所学最终有所落实。以此为校训，体现出教育要坚持“三个面向”的教育方针和服务社会的办学宗旨。 以“厚德、弘毅、求是、笃行”为…
296	Hohai University	艰苦朴素、实事求是、严格要求、勇于探索	DIL; SCH; DIL; WILL	1982年，由中国科学院院士、中国工程院院士、河海大学名誉校长严恺教授提出。 校训内涵：“艰苦朴素”是学校在创业和奋斗历程中的精神写照，也是对全校师生员工提出的生活准则，只有能吃苦的人才能在水利水电事业上有所作为。“实事求是”是我们党的光荣传统，也是在全校科研工作者中倡导的科研态度，知之为知之，不知为不知。“严格要求”是对全校师生员工提出的工作标准，就是对待学习和工作要有一丝不苟的严谨态度。“勇于探索”是在全校师生员工中倡导的精神风貌，只有不断探索，克难奋进，才能大胆创新，取得卓越成就。 严恺院士曾多次陈述校训含义：“水利是艰苦的事业，所以,作为一名科技工作者，在生活上一定要艰苦朴素。要坚持实事求是的原则，科学是严肃认真的，不能马虎，所以还要严格要求，要有创新精神，才能取得独特成就。”
297	Jiangnan University	笃学尚行、止于至善	SCH; ACT; MOR1	笃，有笃实、笃厚、真诚之义。《论语•泰伯》中有“君子笃于亲，则民兴于仁。”笃学，勤学。强调要以求真务实的态度做学问，反对虚假与浮躁之风。尚行，提倡实际行动，尊崇实践。孔子提倡“讷于言，而敏于行。”北宋易学家邵雍《皇极经世书•观物篇》中有“尚行，则笃实之风行焉。”强调不但要在认识上有所提高，而且要身体力行。“笃学尚行”，强调的就是知行合一，理论与实践相结合。“止于至善”，出自《礼记•大学》开首句“大学之道，在明明德，在亲民，止于至善。”强调通过不断进取，达到善的最高境界。 从“笃学”到“尚行”到“止于至善”是一个渐进的过程，“笃学”是基础，是前提；“尚行”是关键，是途径；“止于至善”是目的，是人生追求的最高境界。笃学尚行，止于至善，是为学之道，为事之道与为人之道的有机结合。“笃学尚行，止于至善”，既传承了江南大学百年办学“论究学术、阐求真理、昌明国粹、融化新知”的文化传统，又融合了现代教育…
298	Nanjing Forestry University	诚朴雄伟，树木树人	MOR1; MOR1; PROF; MOR2	在办学110周年暨独立建校60周年校庆庆典到来之际，我校启用校训“诚朴雄伟，树木树人”。 “诚朴雄伟，树木树人”中的“诚朴雄伟”源自中央大学校训。梁希、郑万钧诸位名师前辈，秉承此训，为林业科研、林业发展做出了重大贡献，我校予以继承，同时赋予其新的时代精神，将之弘扬光大。“诚”，即真心，诚意。“朴”，即质朴，朴真，朴实，实事求是。“雄”，即雄壮、雄伟、称雄。“伟”，即伟大、崇高、卓越。“诚朴雄伟”是优质的教师、优秀的学生、杰出的人才必须具有的品德、精神、学识、目标、理念的训导。 “树木、树人”与学校发展历史吻合，同时对当下多科性大学人才培养、科学研究等工作具有普遍指导意义。“树木”，既是学校传统优势林科的职责与使命，同时也指出了事物发展尤其是科学研究的规律：耐得寂寞，坚守坚持，才能有所成长、有所收获。相比“树木”，“树人”的工作更是长久之计、不易之事，“树人”是学校与教师应履行的首要任务，…
299	Jiangsu University	博学、求是、明德	SCH; SCH; MOR0	苏大学校训“博学、求是、明德”，3个词组，6个汉字，落落大方，任重道远，既古典雅致，又言约意丰。 博学者，虚怀若谷、博采广纳。求是者，寻寻觅觅、追求真理。明德者，知书达理、恪守仁德。 “博学、求是、明德”六字校训，体现了我们中华民族的教育精神，凝聚着当代高等学校的办学理念，具有整体之美。“博学”是“求是、明德”的前提和基础；“求是”是“博学、明德”的深化和体现；“明德”是“博学、求是”的灵魂和目标。三者由表及里，层层递进，环环相扣，充分展现了江苏大学的丰厚底蕴。 品读再三，“别有一番滋味在心头”。然而，校训再美，倘不落实，便形同虚设。只有让江大校训扎根于我们的心坎上，融化在我们的血液里，并落实在我们的行动上，使其转化成我们江大人蓬勃的精神力量，才能折射出江大校训的独特风采与无限魅力!
300	Nanjing University of Information Science and Technology	明德格物，立己达人	MOR0; SCH; MOR1; MOR2	建校50周年之际，经全校师生广泛参与、贡献智慧，凝练校训为“明德格物，立己达人”。 明德格物：语出《礼·大学》，取“德才兼备、以德为先”之意。明德，即立德修身；格物，即笃学求是。立己达人：语出《论语·雍也》，取中国知识分子“独善其身，兼济天下”之意。立己，即自律自强；达人，即尽责尽心。
301	Nantong University	祈通中西、力求精进	SCH; DIL	(一)“祈通中西 力求精进”分别取自于张謇先生为原南通学院医科、纺织科所提训词“祈通中西 以宏慈善”“忠实不欺 力求精进”。选用张謇先生的训词作为校训，首先在于张謇先生作为中国近代实业家、教育家，他的教育思想极为丰富，前瞻性强，至今仍对我们有很强的启示性，而且，可以作出富有时代意义的与时俱进的解释。其二是可以为南通大学找到历史的渊源，承载南通大学的文化积淀，使南通大学具有厚重的历史感和文化的传承性。 (二)“祈通中西”是南通大学的教育理念，同时也是学校事业发展的目标。在全球化背景下，我们培养的教师和学生，必须具有历史眼光和世界眼光，必须在全球范围内，多样化思想文化相互激荡的前提下，既保持本民族的优秀传统文化，又以海纳百川的气魄拥抱世界所有优秀文明成果，融通古今，学贯中西，努力使自己成为中国特色社会主义事业的合格建设者和可靠接班人，从而承担起中华民族伟大复兴的重任。作为一所综合性大学，南通…
302	Yancheng Institute Of Technology	厚德格致、笃学重行	MOR0; SCH; SCH; ACT	厚德 强化品德修养，追求高尚人格 格致 缜密推究事理，增强创新能力 笃学 刻苦专心学习，撷取科学知识 重行 注重行为实践，服务和谐社会
303	Nanjing Agricultural University	诚、朴、勤、仁	MOR1; MOR1; DIL; MOR1	学校分别于2004年3月和2008年9月启动校训和校徽的修订工作，经广泛征集、反复论证、认真修订，并经过2009年1月16日第四届教代会暨第九届工代会审议，通过了新的校训和校徽的定稿方案。 新的校训为：“诚 朴 勤 仁”，原校训“团结 勤奋 求实 创新”改作校风使用。 新的校徽是在原校徽的基础上修改而成，原校徽不再使用。 校训“诚朴勤仁”，分别从我校前身中央大学校训“诚朴雄伟”和金陵大学校训“诚真勤仁”中各取二字组合而成，是我校在百余年办学历程中，秉承中央大学、金陵大学优良传统，逐步形成的具有南农特色的精神品格。 “诚”，诚恳、诚信。《礼记·中庸》有云：“诚者天之道也，诚之者人之道也。”“诚”是天的根本属性，努力求诚，以达到合乎诚的境界则是为人之道。以“诚”字为校训之首，意在训诫师生员工诚信做人，诚实做事。 “朴”，朴实、朴素，于质朴笃实中见才华，于朴素气质中见本性。《道德经》有云，“道…
304	Nanjing Medical University	博学至精、明德至善	SCH; MOR0	博学，是学问丰富的意思。至，是达到的意思。精，有精深、完美之意。博学至精 指通过广泛的学习，掌握广博的知识，达到精通专业、臻于完美的境界。 明德，指懂得、通晓道德。至，是达到的意思。善，有善良、完好之意。明德至善，指通过品德修养，明确道德责任，达到高尚的境界。 博学、明德，是寄望学生既在学业上有所成，又追求美好的道德情操，品学兼优、德、术双馨。至精、至善，是表明博学、明德的目标，以激励学生不断以高标准要求自己，惧而不舍、追求卓越，努力达到完善之境界。
305	Xuzhou Medical University	以德载医、博学创新	MOR0; PROF; SCH; INNO	在大学里，学会如何做人非常重要。儒家经典《大学》开宗明义：“大学之道，在明明德，在亲民，在止于至善。”近代著名教育家唐文治老先生也有一句教育名言：“欲成第一等学问、事业、人才，必先砥砺第一等品行”。我们徐州医学院的校训“以德载医，博学创新”中的“以德载医”，就蕴含了 “一等学问必先砥砺一等品行”这个道理。学会做人是根本。其次要学会如何做有用的人，学好本领，将来用医学知识回报社会；然后是学会做成功的人。 在大学里，抓好学习十分关键。元代著名学者许明奎的 《劝忍百箴》篇中格言：“立身百行，以学为基。”中国古代还有一句名言：“读万卷书，行万里路。”胡锦涛总书记在与中国农业大学师生座谈时指出“一个人能有多大发展，能为社会作出多大贡献，很大程度上取决于这个人学习抓得紧不紧、知识基础打得牢不牢”。尤其是医学专业知识更新迅速，从事医疗卫生职业更需要保持终身学习。我们徐州医学院的校训“以德载医，博学创新…
306	Nanjing University Of Chinese Medicine	自信、敬业	WILL; PROF	自信体现一种卓越的人格素质。自尊、自强方能自信；而自信又是克服困难，达到目标的基础，亦含有坚信中医药事业必定发扬光大之意。敬业为热爱专业、热爱职业、热爱事业之意。自信、敬业从人格与从业态度提出要求，言简意赅，涵意深远。
307	China Pharmaceutical University	精业济群	PROF; MOR3	‘精业’是提倡刻苦钻研，精攻药业，见贤思齐，精益求精，把自己打造成行家里手；‘济群’则是提倡惠济众生，以服务国家和人民为己任，将个人的知识和能力奉献于社会，造福于民众。 办学之初，学校以培养具有高度社会责任感的药学专门人才为己任，确立了“精业济群”的校训。期间，此校训曾被改为“严谨求实，团结创新”，直到2006年11月药大70周年校庆方才改回。七十年来，中国药科大学秉承“精业济群”精神，存心以仁，任事以成，兴药为民，荣校报国，积淀了深厚的文化底蕴，熔铸成独特的治校品格，走出了一条“不唯药，需围药，应为药”的特色兴校之路
308	Nanjing Normal University	正德厚生，笃学敏行	MOR0; MOR3; SCH; ACT	正德”“厚生”语出《尚书》“正德、利用、厚生、惟和”，其中“正德”意为端正自己的德行，与南京师范大学校史上以“诚”为训的传统一脉相承，故放在校训之首；“厚生”还取自学校另一重要源头金陵女子大学的校训，主张积极回报社会。“笃学”“敏行”语出《论语》，意即知行合一：既要注重“学品”，老老实实、认认真真地做学问，也要勇于实践，大胆改革，在实践中检验真理。
309	Jiangsu Normal University	崇德厚学、励志敏行	MOR0; SCH; WILL; ACT	一、形式 文字简练，字无重复，包容量大，内涵丰富，文字张力强。且富含对称之美，读之琅琅上口，思之回味无穷。 二、释义 1.“崇德”,即崇尚道德，追求品德端正，意在告诫师生彰明伦理，完善品德。它是校训中最基本的要求，故而放在最前。“崇德”极富传统文化意蕴，它与《周易》的“厚德”和《大学》的“明德”异曲同工，且又避免了使用这两个词而与其他许多大学校训重复的弊端。 2.“厚学”与“崇德”相对应，指要博学、厚积薄发。 3.“励志”,是砥砺、激励人树立远大志向，志存高远，注重知识的拓展，素质的培养，品格的塑造。 4.“敏行”,意思为“勉力修身”,语出《论语》:“君子讷于言而敏于行”,意指在君子应该在言语上谨慎庄重，在行为上要迅速、灵活。 三、内涵 “崇德厚学，励志敏行”具有深厚的中国哲学、历史、文化底蕴。“崇德厚学”彰显了办学理念和宗旨，对教师来说是要树立高尚师德，注重言传身教，对学生来说强调建树…
310	Huaiyin Normal University	崇德、励志、博学、笃行	MOR0; WILL; SCH; ACT	“崇德”，即崇尚道德，追求品德端正，意在告诫师生彰明伦理，完善品德。“崇德”极富传统文化意蕴，它与《周易》的“厚德”和《大学》的“明德”（“大学之道，在明德，在亲民，在止于至善”）异曲同工，且又避免了使用这两个词而与其他许多大学校训重复的弊端。“厚学”与“崇德”相对应，指要博学、厚积薄发。 “励志”，是砥砺、激励人树立远大志向，志存高远，注重知识的拓展、素质的培养、品格的塑造。“敦行”，“敦”是敦促、勉力之意，“敦行”就是重视践履，勉力去做，身体力行。 博学笃行：《中庸》之谓“博学之，审问之，慎思之，明辨之，笃行之”，是说无论从事任何工作，做任何一个学问，都需要广泛地学习，仔细地探究，谨慎地思考，明确地辨别，最后切实地去实行，如此为学才能有成。博学笃行，是一种诚实，是实事求是。凡事只要忠贞不渝，勤奋努力，就能达到确定的目标。正所谓天下无难事，只要肯登攀。 在60余年高等教育办学历程中，淮…
311	Yancheng Teachers University	厚德、博学、求真、笃行	MOR0; SCH; SCH; ACT	厚德，言主体内在的素质、操行和境界，弘扬崇高思想情操和道德修养，继承优秀传统道德，兼容吸收人类道德文明，树立高尚道德。强调德、智、体全面发展，德是至关重要的，事关培养合格的建设者和劳动者。因此，学校把德育放在首位，坚持正确的教育方向，加强对广大师生员工的道德教育。故“厚德”是做人的根本，也是我们必须践行的道德准则。 博学，意谓为学要广泛的猎取，培养充沛而旺盛的好奇心，还意味着博大和宽容。博学是对知识追求的强烈愿望，是对每个人自身发展和完善的客观要求，也是古往今来人们成就事业、开启知识宝库的必由之路。广博学习，要求师生要博览群书，采众家所长；要拓宽知识面，厚基础、宽口径；要博学多闻，厚积薄发，以适应新时代新形势的要求。以“博学”为做学问之道，方能学有所依、学有所成、学有所用。此外，博学还要求视野超前，胸襟开阔，严于律己，宽以待人。 笃行，其意为坚定、忠诚，重视实践，一心一意，践行不倦。笃行…
312	Nanjing University Of Finance & Economics	自谦、自信、务实、超越	MOR1; WILL; ACT; WILL	学校秉承“自谦、自信、务实、超越”的校训精神，在自谦求索中展现自信，在务实求真中超越自我。
313	Jiangsu Police Institute	无私奉献	MOR3	建校以来，学院始终坚持党的绝对领导、全面领导，全面贯彻党的教育方针，认真落实立德树人根本任务，坚持“姓党”第一属性、“姓警”第一特征，紧跟时代发展，锐意改革创新，充分发挥江苏公安机关专门人才输送“主渠道”、警察训练“主阵地”、警务研究“主力军”、警务实战“机动队”作用，为平安江苏、法治江苏和“强富美高”新江苏建设作出了积极贡献。 学院坚持政治建警、政治建校方针，秉持“无私奉献”校训和“政治坚定、学习勤奋、作风踏实、警纪严明”校风，着力培养忠诚可靠、纪律严明、基础扎实、文武兼备的高素质政法公安专门人才。
314	Nanjing Sport Institute	严、和、朴、实	DIL; INCL; MOR1; ACT	“严”，就是要严以律己。 相对于学校而言，走上社会会面临更为严格的要求、更加激烈的竞争，要想拥有立足之地、站稳脚跟直至应付自如，关键一点就是要严字当先、不断做强自己。在学校有老师的提点、督促，进入社会主要依靠大家的自觉、自立、自省，做人要严格要求自己，不断加强自身品质修为、提升道德境界；做事要严肃认真，以爱岗敬业的理念提升自己的能力、做好自己的本分、证明自身的价值。对于继续深造的同学，则要做到严谨求学，以更高的标准接受更为严格的学业考验。 “和”，就是要和以待人。 如何与形形色色的人相处，将成为大家进入社会的重要课题，需要大家不断磨练、积累智慧。首先，要有容人之量，既要善于团结与自己意见相同者，也要包容与自己意见不同甚至反对者；既要争取对自己有帮助的人，也要容得下自己的对立面、挑战者；既要容得才能不如自己的人，也要容得下本领比自己高的人，这是和以待人的根本。其次，要有助人之德，多为别人考…
315	Nanjing University of the Arts	闳约深美	SCH; PROF	1918年，南京艺术学院前身之一的上海美专新礼堂落成，蔡元培先生专门题写了“闳约深美”予以馈赠。在老校长刘海粟看来，这四个字高屋建瓴，寓意深刻，对上海美专的师生，包括他本人都起到了座右铭的作用。于是，刘海粟嘱人将之用楠木刻成匾额，悬挂于礼堂，“闳约深美”这四个字也就成了上海美专的不朽学训，而后又成为了南京艺术学院的校训。 在南京艺术学院现任校长刘伟冬看来，对自然的体悟，对传统的秉承，对中西文化的感受是为“闳”；百川归海，兼收并蓄是为“约”；日月常新，不断精进是为深；在世界上弘扬中华文明，使我们国光绵绵是为“美”，而且是一种大美的境界！
316	Suzhou University of Science and Technology	致远至恒，务学悟真	WILL; SCH; SCH	诸葛亮《诫子书》中有“非宁静无以致远”句，此句中致远正来源于此。 意思是：如果能够以最大的恒心潜心治学，就一定能够悟出真正的道理。 昂首阔步新征程，凝心聚力再出发。苏州科技大学将深入学习贯彻习近平新时代中国特色社会主义思想，以全方位服务美丽中国建设为己任，秉承“致远至恒，务学悟真”的校训精神，坚持“立足长三角，服务全中国，辐射海内外”的办学定位，注重内涵建设，强化特色发展，提升办学实力，努力将学校全面建设成为特色鲜明、品质卓越的高水平教学研究型大学。
317	Changshu Institute of Technology	立本求真,日新致远	MOR1; SCH; INNO; WILL	“立本”语出《中庸》“立天下之大本，知天地之化育”和《论语》“君子务本，本立而道生”。《中庸》把正心、明礼、克己、助人、互爱、同乐等一系列道德规范视作天下大本，是为人处世必须具备的条件。《论语》强调要致力于树立根本，根本确立了，原则、措施、方法等自然就有了。学校以育人为本，培养德智体美全面发展的高素质人才，是学校的根本任务；师生以做人为本，做一个高尚的人，纯粹的人，大写的人，是生活的首要目标；学校集体和师生个人都要注意立足之本，奠定和巩固持续生存、发展的基础，以期长盛不衰，大有作为。 “求真”，语出陶行知“千教万教教人求真，千学万学学做真人”。真，客观的情况、状态，事物的本质、规律；真诚，是对人来说最重要的品格（《马克思的自白》）。求真，就是要认识世界，探索规律，崇尚科学，坚持真理，追求真、善、美。 立本与求真是相辅相成的。立本是求真的归宿，求真为了立本；求真是立本的径由，求真才能立本；…
318	Nanjing Vocational University of Industry Technology	敬业乐群	PROF; MOR2	校训是广大师生共同遵守的基本行为准则与道德规范，它既是学校办学理念、治校精神的反映，也是校园文化建设的重要内容，是一所学校教风、学风、校风的集中表现。 “敬业”是培养学生的职业感情、职业兴趣，同时也是培养学生的责任心，使学生热爱自己的事业，忠于职守。“乐群”是培养学生服务社会的奉献精神。 召同学们要秉承校训精神，炼就职业品质。只有敬业才能赢得职业成功，只有乐群才能融入团队、融入社会。【南工院校训精神讲座】 校园文化建设将以立德树人为根本任务，以社会主义核心价值观为导向，以传承创新“敬业乐群”校训精神为主线，以建设优良校风为抓手，努力形成催人奋进的学校精神、科学民主的管理制度、丰富多彩的文化生活和优美舒适的校园环境，促进学校全面协调和可持续发展。
319	Huaiyin Institute of Technology	为中华之崛起而读书	MOR3+SCH	学校已有60多年的建校历史，学校将周恩来总理少年时立下的“为中华之崛起而读书”的誓言确定为校训，学院党委始终将立德树人作为根本任务，坚持“为党育人、为国育才”。 淮阴工学院地处周恩来故乡江苏省淮安市。 在长期的办学实践中，学校继承和发扬苏北革命老区人民艰苦奋斗、迎难而上的优良传统，以立德树人为根本，以提高质量为核心，以服务需求为导向，充分利用地处周恩来故乡的优势，打造用周恩来精神育人特色，求真务实，团结奋进，形成了“明德尚学，自强不息”的淮工精神，为区域经济社会发展培养了大批优秀人才，赢得了良好的社会声望。 面向未来，学校秉承“为中华之崛起而读书”的校训，遵循开放发展、协同发展、特色发展的办学理念，坚持教学型、地方性、应用型基本办学定位，大力实施质量立校、人才强校、特色兴校、文化铸校战略，走内涵式发展之路，致力于把学校建成以工为主、多学科协调发展、特色鲜明的地方理工大学，努力办好人民满意…
320	Changzhou Institute of Technology	教会学成，守正有为	PROF; SCH; MOR1; ACT	“教会”是从“教”的角度强调每一位常州工学院教师的责任。学校要求每位教师做到“有教无类”、“因材施教”。每一位教师都要以高度的责任心与事业心、专业的学术素养和学术精神培养每一位学生全面发展的能力；每一位常州工学院教师都要努力增强自身的执教能力，特别是培养应用型人才的能力，针对不同层次、不同水平的学生，制定不同的授课、辅导方案，传道、授业、解惑，使每一位学生都学有所成。“教”是人才培养的途径，“会”是人才培养的质量标准。“教”要以“会”为标准和目的。每一位常工院教师不仅要教会学生如何做事，更要教会学生如何做人；不仅要教会学生接受、掌握知识，更要教会学生运用知识分析、解决问题；不仅要教会学生学习知识，更要教会学生将知识转化为能力和素质；不仅要培养学生消化知识能力，更要培养学生独立学习的能力；不仅要培养学生学习的能力，更要培养学生实践的能力；不仅要培养学生尊重知识、尊重科学的精神，更要培养学生…
321	Yangzhou University	坚苦自立	DIL; WILL	“坚苦自立”，取自近代中国实业家、教育家——张謇先生为其创办的通州师范学校（即扬州大学的源头）所立校训。 “坚苦自立”的内涵十分丰富。“坚，刚也”（《说文》）。“坚”的本意是牢固、结实，含执着、刚正、笃实之意。“坚苦”是指抱定宗旨，矢志不移，勇往直前；含有信念执着、意志坚强，勤勉刻苦、务实笃行之意。“自立”是指不依赖他人，凭自己的劳动而独立生活，靠自身的努力而有所建树，含有自尊自信，自强不息之意。“坚苦自立”，关键在“坚苦”，根本是“自立”。一方面，非“坚苦”无以“自立”，另一方面，坚毅刻苦的意志品格，又源于“自立”者强烈的自我担当意识和社会责任感。中国自古就有立德、立功、立言“三不朽”之说，后世学人更是将“为天地立心，为生民立命，为往圣继绝学，为万世开太平”（北宋·张载）视为至高至善的人生追求。 坚苦自立，首在立志。弘扬坚苦自立的精神，就要志存高远、矢志不移，做一个信念执着、意志坚强的…
322	Nanjing Institute of Technology	学以致用	SCH; ACT	校训校风是一所学校办学思想、办学理念、内在精神和文化传统的集中体现，是一个学校的领导者和全体师生员工努力的方向和目标，也是学校开展各项活动所应遵循的行为准则。为提升办学理念、塑造崭新的校园文化、培养更加严谨的治学和求学的精神、实现学院的跨越式发展，在向各方专家学者咨询的基础上，经广泛征求师生员工的意见，最后由院务会讨论研究，确定“学以致用”为我院的校训校风。 学以致用的字面涵义: 致：使达到。“学以致用”意即学习要注重理论联系实际，注重知识与技能并重，注重创新精神、实践能力和创业能力的培养。 “学以致用”植根于中华民族博大精深的传统文化 将学习、思考、实践三者紧密结合是中国教育的优秀传统。两千多年前，孔子就强调知行统一，学以致用。《论语》第一句话为“学而时习之”，又说：“传不习乎”，这里的“习”字，含有践履的意思。孔子有句名言：“听其言而观其行”，这句话亦强调了“行”是检验认识的标准，体…
323	Nanjing Audit University	诚信、求是、笃学、致公	MOR1; SCH; SCH; MOR3	诚信——发己之诚，得人之信； 求是——去伪存真，探索创新； 笃学——敏而好学，慎思明辨； 致公——致力奉公，公平公正。 “诚信、求是、笃学、致公”的校训，既弘扬了中华民族传统文化中的优秀价值观，又融合了现代教育教学理念；既传承了南审人的创业精神，又吸纳了当代中国审计文化的精神内核。诠释校训的“诚信品质、科学精神、追求卓越、致公情操”是学校师生员工的行动指南和核心价值追求。
324	NanJing XiaoZhuang University	教学做合一	PROF; SCH; ACT	我们的校训是“教学做合一”。1927年陶行知先生在创办晓庄试验师范学校发表了题为《教学做合一》的演讲,并将“教学做合一”作为校训，蔡元培先生为学校亲书校训。2000年南京晓庄学院成立后，晓庄人再次将“教学做合一”确立为校训。 “教学做合一”是陶行知生活教育理论中的一个重要命题，它与“生活即教育”、“社会即学校”共同构成了生活教育理论体系。1926年12月,陶行知在《中国师范教育建设论》中对“教学做合一”的原理进行了系统的论述，以后又多次谈“教学做合一”。在陶行知看来，“教学做合一”的要义有三：第一，“教学做合一”“是生活法，也就是教育法”。“教的方法根据学的方法，学的方法根据做的方法”。“事怎样做便怎样学，怎样学便怎样教”。“教与学都以做为中心”。“我们要在做上教,在做上学。在做上教的是先生，在做上学的是学生。”第二，“教学做合一”是“生活现象之说明，即是教育现象之说明”。“在生活里，对…
325	Jiangsu University of Technology	厚德、博学、笃行	MOR0; SCH; ACT	厚德：语出《周易·坤卦》：“地势坤，君子以厚德载物。”“厚德”就是深厚的德泽、宽广的心胸、乐于奉献的精神，不计较个人得失。 博学：语出 《论语·子张》：“博学而笃志，切问而近思。” 《说文解字》中“博”，大通也，即宽广、广博之谓。“博学”既指广泛学习，也指学识渊博。旨在强调通过广泛学习，具备宽厚的理论基础，娴熟的基本技能，文理兼容，百科俱收。 笃行：语出 《礼记·中庸》：“博学之、审问之、慎思之、明辨之、笃行之。”“笃”有忠贞不渝，踏踏实实，一心一意，坚持不懈之意，“笃行”意为坚定信念、持之以恒、脚踏实地、身体力行，也包含百折不挠、愈挫愈奋的精神。 “厚德”意在彰显学校厚重质朴、臻于至善的品质，期望师生员工砥砺德行，以高尚的道德立身，以博大宽厚的胸怀承载天下重任；“厚德”强调师生要具有高尚的道德品格和良好修养，只有这样，为人师表的教师才会更加敬业爱岗，为祖国培育下一代更加尽职尽责；青春年…
326	Jiangsu Ocean University	严师尊道、明德至善	MOR1; MOR0; MOR1	学校坚持以人才培养为中心，努力培养德智体美劳全面发展，基础好、素质高、能力强，具有海洋意识、创新精神、家国情怀的复合应用型人才。专业建设紧密对接国家和区域产业发展需求，不断加大调整和发展力度。
327	Xuzhou University of Technology	格物致知、敬业乐群	SCH; PROF; MOR2	校训取自于《礼记▪大学》和《礼记▪学记》,意为先要细心体验,观察,才能彻底掌握学问;只有怀抱敬爱之心,友善之意,才能把学问做好,成大事.徐州工程学院坚持"立足徐州、面向苏北、服务江苏"的服务定位,为区域经济社会发展培养高素质应用型人才。
328	NanjingNormal University of Special Education	博爱塑魂	MOR3; WILL	出处：《原道》。 核心要义：“博爱”即广泛地爱，惠及所有的人。“塑魂”即塑造鲜活的灵魂。 现实意义：校训是办学理念的精髓表述、核心表达，是校风、教风、学风的理念源泉和精神统领。将“博爱塑魂”定为校训，既是传承南京特师建校以来的办学理念，也是强调特殊教育事业的崇高使命。南京特师作为全国唯一独立设置的特教师范本科院校，全体师生不仅要怀揣对特殊教育事业和特殊儿童的“博爱”之心，更要以“博爱之心”去教书育人、传道授业、“塑造灵魂”，以履行为国家、为社会“塑魂”育才之责。
329	Nanjing police university	忠诚、团结、严谨、勤奋	MOR3; MOR2; DIL; DIL	无释义
330	TaiZhou University	敦尚行实、明体达用	ACT; MOR1 + SCH + ACT	“敦尚行实 明体达用”源自北宋泰州著名教育家胡瑗的教育思想，并与明代泰州学派王艮“百姓日用即道”和抗日战争期间首任校长刘伯厚“学用一致”思想一脉相承，以深厚的文化底蕴、强烈的时代色彩、鲜明的地方特色，引领一代代泰州学院人薪火相传、弦歌不辍。 “敦尚行实”回答了怎样培养人的问题。“敦尚”是坚守初心、严谨治学,坚持社会主义办学方向；“行实”是身体力行、勇于实践，服务地方经济社会发展。 “明体达用”回答了培养什么人的问题。学校全面落实立德树人根本任务，明“立德”之体、达“树人”之用，培养中国特色社会主义事业建设者和接班人；明“理论”之体、达“实践”之用，培养服务地方基础教育和经济社会发展的应用型专门人才。
331	Jinling Institute of Technology	厚德兴业	MOR0; PROF	“厚德兴业”的内涵解释:“厚德”源于《周易》“天行健，君子以自强不息;地势坤,君子以厚德载物。"“厚德”意即“积累道德”,蕴涵“德随量进，量随识长，欲厚其德，必弘其量，欲弘其量，必长其识”的意义;“兴业”所倡导的是“立足专业，抓住就业，创出真业，在宁兴业。”
332	Wuxi University	明德格物、立己达人	MOR0; SCH; MOR1; MOR2	无释义
333	Suzhou City University	文者文章，正者道德	SCH; MOR0	副院长发布校训并解读其内涵意义：校训是广大师生共同遵守的基本行为准则与道德规范，既是学校办学理念、治校精神的反映，也是校园文化建设的重要内容。将“文者文章，正者道德”确定为校训，是对文正精神的重新概括和升华凝练，充分彰显文正学院办学的精神追求和培养目标。副院长施盛威表示，要让“文者文章，正者道德”成为广大师生的内在追求、成为办学理念的传承传播，成为文正品牌的特色标志。 院长总结致辞：20年来学院的变化是巨大的，但矢志不移推动学生成长成才的责任是永远不会改变的。每个文正人要为教育事业，为中华崛起而“左手文章、右手道德”，绽放属于自己和时代的光荣。
334	Suqian University	明德至善、博学致用	MOR0; MOR1; SCH; ACT	校训聚焦立德树人根本任务。把明德、至善作为“立德”目标，突出“德育为先”；把博学、致用作为“树人”归宿，坚持“以人为本”。 （一）明德 明德出自《大学》，“大学之道，在明明德”。习近平总书记在考察清华大学时提出青年要“立大志、明大德、成大才、担大任”。今年教师节前给全国高校黄大年式教师团队回信时指出，好老师要“立德修身，潜心治学，开拓创新”。建校以来，宿迁学院把提高师生道德修养作为宿院遵循和学校共识，以德立校，以德固基，以德育人。一是明大德。教育师生胸怀家国情怀与社会责任感，将“富强、民主、文明、和谐”作为个人价值追求，以“位卑未敢忘忧国”的匹夫有责，“先天下之忧而忧”的胸襟胆魄，“我以我血荐轩辕”的满腔热血，点燃爱校建校兴校的道德热情，为开启“二次创业”新征程提供道德伟力。二是守公德。教育师生谨守公众之德、公权之德和工作之德，将“自由、平等、公正、法治”作为个人价值准则，把“小我”融入…
335	Jiangsu Second Normal University	崇德敬业、求真创新	MOR0; PROF; SCH; INNO	江苏第二师范学院是一所以教师教育为主体、以培养小学和学前师资为重点的省属普通本科学校。其前身江苏教育学院始建于1952年，是新中国建立初期江苏省17所公办本科学校之一。1959年，学校在全国省级教育学院中率先举办普通本科教育。2013年，经教育部批准，学校转设为普通本科学校并更名为江苏第二师范学院。七十余年来，学校师生躬耕教坛、兴教报国，形成了“坚韧不拔、自强不息，强师兴教、忠诚担当”的优良传统，诠释了“崇德敬业、求真创新”的校训内涵，赓续了“学高为师、身正为范”的师范精神，为党的教育事业作出贡献。
336	Zhejiang University	求是创新	SCH; INNO	浙江大学校训——“求是创新”的渊源可以追溯至浙大的前身求是书院。 求是书院自创建之日起，就提倡“务求实学，存是去非”。并在师生中逐渐形成了“正其谊、不谋其利，明其道、不计其功”、“以尽一已职责”的“求是”校风，这种校风一直延续到以后的浙江大学。 抗战期间，浙江大学西迁流亡办学，艰难困苦和生死别离，使竺可桢校长对“求是”有了更深刻的理解。 1938年11月1日，竺可桢在广西宜山的开学典礼上，作了《王阳明与大学生的典范》的演讲。在演讲中，他以王阳明的求是精神、遇险不畏精神、艰苦卓绝精神和公忠报国精神，激励浙大师生在艰危中奋发进取，并提出要以 “求是”两字为校训，以便更好地继承和发扬“求是”的优良传统，贯彻治学的精义。 1938年11月19日，校务会议正式通过了竺可桢的这项提议。 关于“求是”的涵义，竺可桢曾作过多次阐述，他在《求是精神与牺牲精神》的演讲中说：“所谓求是，不仅限为埋头读书或是实…
337	Hangzhou Dianzi University	笃学力行、守正求新	SCH; ACT; MOR1; INNO	“笃学”语出《三国志·吴志》“济阳人马普笃学好古，瑜厚礼之”，指专心致志，潜心求学。“力行”语出《礼记·中庸》“好学近乎知，力行近乎仁，知耻近乎勇”，指竭力而行，努力实践。“守正”语出《汉书·刘向传》“君子独处守正，不桡众枉”，指恪守正道，遵循规律。“求新”语出《礼记·大学》“苟日新，日日新，又日新”，指不断创新，勇于超越。 “笃学力行”突出“学”与“行”的辩证关系，强调学习与实践的统一，体现了学校的育人特色。“守正求新”突出“正”与“新”的辩证关系，强调继承与发展的共生互补，体现了大学的永恒使命。 “笃学力行 守正求新”表达了杭电人做人做事做学问的价值追求，传承了近60年发展历程中沉淀的学校精神，蕴含了十八大以来党中央提出的“坚持立德树人，增强学生的社会责任感、创新精神、实践能力”的时代要求。
338	Zhejiang University of Technology	厚德健行	MOR0; ACT	“厚德健行”出自《易经》：“地势坤，君子以厚德载物；天行健，君子以自强不息。”意即君子当以广厚之德，容载万物，成就事业；以刚毅坚卓，勇于实践，奋发图强。 浙江工业大学校训“厚德健行”勉励师生品德高尚，为人做事，襟怀坦荡；知行合一，锐意进取，追求卓越。力争在品行与事业两个方面都臻于最高境界。 习近平总书记主政浙江期间，曾指示学校“积极发挥自身的学科优势和人才智力优势，努力把学校建设成为各类优秀人才的培养基地和工程科学技术的研究开发基地，为加快浙江全面建设小康社会、提前基本实现现代化作出新的更大贡献。”学校牢记习总书记的嘱托，坚持以一流学科建设为主线，以“立足浙江、服务区域，走向全国、对接国际”为办学宗旨，彰显“以浙江精神办学，与区域发展互动”的办学特色，秉承“厚德健行”的校训，弘扬“艰苦创业、开拓创新、争创一流”的精神传统、“敬业奉献”的教风和“取精用弘”的学风，着力培养一流人才，产出一流…
339	Zhejiang Sci-Tech University	厚德致远、博学敦行	MOR0; WILL; SCH; ACT	“厚德”，犹言大德，引自“地势坤，君子以厚德载物。”借指人事，是谓厚德育人。德，乃立身之本。《论语·述而》“子曰：德之不修，学之不讲，闻义不能徙，不善不能改，是吾忧也。”中华民族自古以来，一直高度重视德育，将其作为教育的首要任务。 “致远”，谓人的志向远大，才干卓越，能担负重任而行于远方。引自诸葛亮的《戒子篇》：“非淡泊无以明志，非宁静无以致远。” “博学”，意指广泛地学习，通今博古，学识渊博。引自《礼记·中庸》：“博学之，审问之，慎思之，明辨之，笃行之。” “敦行”，犹言笃行，意指切实履行，专心实行。引自上博楚竹书《从政（甲篇）》中的“敦行不倦，持善不厌”。又《逸周书·小明武》：“敦行王法。”《荀子·儒效》：“知之而不行，虽敦必困。”此语要求在实践中运用知识，施展才华，做到知行合一。 校训从“德、志、学、行”四个方面对学校的教育理念和内涵进行了阐述，要求师生重视道德修养，树立远大志向，…
340	Zhejiang Ocean University	海纳百川、自强不息	INCL; WILL	海纳百川”四字，首见于《文选》六臣注。《文选·袁宏〈三国名臣序赞〉》：“形器不存，方寸海纳。”唐李周翰注曰：“方寸之心如海之纳百川也。”李周翰以海纳百川来比喻心灵空间的广大，形象真切。吸纳百川、吞吐万有的大家风度乃是海洋之第一特色。扩大办学规模，包容多种学科门类与学术观点，鼓励交流切磋，提高教学质量，培养更多气度恢宏、视野开阔、学术渊博的“海洋”型人才，应当是校训中“海纳百川”四字精义之所在，这是横向拓开。 “自强不息”一语出自《周易》。《周易·乾卦》云：“天行健，君子以自强不息。”古人师法自然，从大自然永不停息的稳健运行中，体会到应有的人生原则，即人应当不休止地自我策励，积极奋进。人生是一个征程，要想实现远大辉煌之目标，必须不断奋进，否则将一事无成，这是纵向推进。 浙江海洋大学的八字校训，从纵横两个方面的结合上，精粹而丰富地展示了恢宏奋进的海大精神。
341	Zhejiang A&F University	求真、敬业	SCH; PROF	凡吾校师生定当： 修身养德，学做真人；崇尚科学，追求真理；师法自然，恪守真实。 学精业广，敬畏为基；乐群笃行，敬尊为怀；经世致用，敬崇为宗。 “修身”出自《大学》“格物，致知，正心，诚意，修身，齐家，治国，平天下”； “学做真人”出自陶行知名言“千教万教教人求真，千学万学学做真人”； “敬业乐群”出自《礼记》“三年视敬业乐群”。
342	Wenzhou Medical University	仁肃勤朴、求是奋发	MOR1; DIL; SCH; WILL	“仁”代表仁心仁术，“肃”意为恭敬、严正和认真，“勤朴”为提倡师生勤勉刻苦、保持朴实。“求是奋发”是对温州医科大学自建校以来的创办历程和精神风貌。
343	Zhejiang Chinese Medical University	求本远志	SCH; WILL	求本，源于《素问·阴阳应象大论》“治病必求于本”。原意为治病应透过表面现象，抓住并针对疾病内在的本质进行治疗。引申为求实、求真、求是。远志，原为中药名，意为志当存高远，寓锐意创新之义。 求本远志校训具体体现为求实、求真、求是的学风；不畏难、不退缩、不浮躁的作风；艰苦奋斗、奋发图强、锐意创新的精神。
344	Zhejiang Normal University	砺学砺行、维实维新	SCH; ACT; ACT; INNO	“砺学砺行”之“砺”本指磨刀石，用作动词，意为“砥砺”“磨砺”。“学”指“学问”和“学习”，前者主要指“学识”“理论”，后者主要指“认知”“研习”。“行”指“行为”和“作为”，前者主要指“行动”“实践”，后者主要指“品行”“有为”。“砺学砺行”包孕着丰富的辩证思维，倡导学校师生不仅要做到“知行合一”“学行并举”“理论联系实际”“道德文章俱佳”，而且要将“学”与“行”统一于相互激励的动态过程之中，着力于励志奋勉、精韧不怠。“砺学砺行”要求全校师生员工立学立行，不断修养学品、探研学问，且躬身履践、日进有功，以达到超迈高远的卓越人生境界。 “维实维新”之“维”本指系物的大绳，后指一切事物赖以固定的东西，如“地维”“纲维”等。“维”用作动词，意为“维系”“连结”。“实”即“实事求是”“敦实诚信”之“实”；“新”乃“革故鼎新”“开拓创新”之“新”。浙江师大人崇尚实践、探究本质、追求创新，形成了独特…
345	Hangzhou Normal University	勤慎诚恕、博雅精进	DIL; DIL; MOR1; MOR1; SCH; DIL	“勤慎诚恕”，“勤”表时习、敏求、不厌不倦之意；“慎”是慎言、慎行、寡尤寡悔；“诚”代表真实、无妄、成己成物；“恕”指“己所不欲，勿施于人”，推己及人。这四个字可视为学校对师生在修身方面的共同要求。 “博雅精进”四字是在新的历史时期对“勤慎诚恕”的必要补充。“博”字更是对当代大学生在知识结构上的要求。“雅”字体现了江南的人文特色，同时又与杭州“精致和谐”精神相一致。“精”字是在“博”的基础上的更高要求，体现在精神上，也体现在行为上和学术上。“进”字涵盖了“与时俱进”的理念，更是新时期学校发展的必然诉求。这四个字可视为学校对师生在追求卓越和开创精神方面的要求。
346	Huzhou University	明体达用	MOR1 + SCH + ACT	“明体达用”系北宋著名思想家、教育家——胡瑗的教育思想精髓。“体”指儒家本位的经训大义，“用”为经世致用，“明体达用”即经义与治事的有机结合。 习近平总书记在浙江工作期间来我校视察，充分肯定我校“明体达用”校训符合教书育人要求，认为“明体”就是培养有理想、有道德、有知识、有志向的人，“达用”就是培养有用的人，做有为之士。
347	Shaoxing University	修德求真	MOR0; SCH	“修德求真”的校训具有深厚的文化底蕴。她的思想精髓与古越先贤崇尚自然、务实尚用、开拓进取之“越学”作风一脉相承。 “德”是为人之根本，涵盖了一切美好品行。“德”的价值原则，被孔子发展为“道之以德，齐之以礼”的王道原则；被孟子发展为“民为贵，社稷次之，君为轻”的民本原则；被《礼记·大学》发展为“大学之道在明明德，在亲民，在止于至善”的道德纲领。 “修德”是做人的根本，也是大学生必须践行的道德准则。借用老校长陈祖楠昔日的评价：“修德即德育，是整治、锻炼与提高的过程。”文理学子当谨遵校训，持“修德”之念，奋发图强，为母校留下浓墨重彩的一笔。 “求真”是“三人行必有我师”的善学；是“吾日三省吾身”的律己；是“三思而后行”的慎行。她体现了学校的价值追求，这种精神，是学校发展壮大的根本原因，也是学校人才辈出的内源动力。
348	Taizhou University	澡身浴德、修业及时	MOR0; PROF	澡身浴德，意为要如日常洁净身体一样勤于道德的修炼，不断提升自己的道德品行。语出《礼记·儒行》：“儒有澡身浴德”。唐代孔颖达《礼记正义》注：“澡身而浴德者，澡身谓能澡洁其身，不染浊也；浴德谓沐浴于德，以德自清也。”“澡身浴德”四字同时也是我校前身、始建于 1907 年的三台中学堂简易师范科所立校碑的铭文，碑石至今尚在。 修业及时 ，意为要致力于事业的建树，学业的提高，以不断适应社会发展的需要，赶上时代潮流的步伐。语出《易经·乾卦》：“君子进德修业，欲及时也。故无咎。” “及”是动词，意为赶上；“及时”是与社会相应、与时代同步的意思。 “澡身浴德 修业及时”突出了“立德、修业、致用”三者的内在联系，立德是根本，修业是手段，致用是目的（“及时”）。 用它作为校训，反映了我校秉承优秀教育思想和务实的办学态度；切合我校以学生成才为本的办学理念，与“地方性、应用性、综合性、高教性”的办学定位相一致。…
349	Wenzhou University	求学问是、敢为人先	SCH; WILL	“求学问是”是高校师生的天职。意为勤奋好学，严谨治学，追求真理。告诫温大人以求真务实、探究学问为毕生事业，努力形成良好的教风、学风和校风，不断造就厚德博学的高素质人才。 “敢为人先”是温州精神的精髓。意为开拓进取，敢想敢为，追求卓越。要求温大人敢于迎接新挑战，冲破旧框框，探索新路子，取得新成就，努力把学校建设成为具有鲜明地域特色、国内知名的教学研究型大学。 校训精神体现了温大人特有的文化品质，凝结了学校八十多年办学的优良传统，激励着一代又一代的温大人克难攻坚，团结拼搏，铸就了一个又一个的辉煌，也必将为学校未来的改革发展提供强大的精神动力。
350	Lishui University	明德笃行	MOR0; ACT	礼记大学云：大学之道在明明德。其中庸云：博学之，审问之，慎思之，明辨之，笃行之。我校肇自清季孙诒让先生启之，先生又名德涵，其育人也亦以德润化，今举明德以绍先生遗意，德必彰之，以行浙东学术之本也。陶行知先生亦力持之故，举笃行以崇知行合一。我校师生敢不以德相传，以德自励，兴经世之实学，求真知于力行，以期弘百年之业而当邦国之任乎。
351	Zhejiang Gongshang University	诚毅勤朴	MOR1; DIL; DIL; MOR1	“诚”，诚实、诚信、真诚、纯真，就是要我们拥有诚实守信、襟怀坦荡之品格。 “毅”，坚毅、刚毅，执着、坚定，就是要我们磨砺意志，开拓进取，不屈不挠，执着追求美好的理想。 “勤”，勤奋、勤勉，勤业、敬业，就是要我们养成勤奋勤业、不懈探索之习惯。 “朴”，朴素、朴实，纯朴，淡然，就是要求我们追求朴素自然、从容淡定之生活方式和人生境界。
352	Jiaxing University	方正为人、勤慎治学	MOR1; SCH	作为一所与新世纪同行的本科院校，嘉兴学院甫一问世就得到陈省身先生的关心和厚爱。1999年，在嘉兴学院联合升本筹建之际，他受聘为学校名誉院长。此后的每一年，即便是坐着轮椅，他都亲自来校视事。2004年7月21日，他应邀为学校题写了“方正为人勤慎治学”的校训，这是先生留给嘉兴学院最宝贵的精神财富。 作为20世纪最伟大的几何学家，陈省身以自己完美的人格和卓越的学术成就为世人景仰。“省身文化”品牌的内涵包含三个层面：首先，“省身文化”当含陈省身先生之名讳，蕴含高山仰止，引领全校师生传省身之厚德，修载物之长风；其次，“省身文化”记载陈省身先生所题“方正为人，勤慎治学”遗训，意在传承学校九十余年办学传统，凝炼彰显个性化的校园文化精神；第三，“省身”又源出于《论语·学而》“吾日三省吾身”句，意寓克己修身，道德垂范，完善人格，自强不息。故而，“省身文化”品牌当以“方正为人，勤慎治学”为核心，以“人文情怀…
353	China Academy of Art	行健、居敬、会通、履远	ACT; MOR1; INCL; WILL	行健、居敬、会通、履远，代表着学院的精神规箴，最早的提出约在十年之前，80周年校庆前后，是作为对同学们的品行与志向的要求来提出的。去年底，在征求各方面意见之后，正式报请学院学术委员会审议，经投票通过，确立为中国美术学院校训。今天，值此学院88周年校庆之际，隆重发布。下面，是我对校训八字的释义。 行健，语出《易经·乾卦》：天行健，君子当自强不息。君子如何能自强？宋儒张载有言：为天地立心，为生民立命。天地本无心，此心即中华文化之心。 “天地立文心，艺者当自强；蓄行求刚劲，积健铸栋梁。”要以文心来鞭策我们的行为，以求取刚劲。司空图《二十四诗品·雄浑》有“积健为雄”之说，我们要积蓄健行，铸成栋梁。 “美育引化育，激情塑民情；代代承使命，莘莘勇担当。”中国美院建院之初就强调西湖美育，以美育来引领社会的化育，以激情塑造民族的情怀，这样的使命已然铸成学脉，代代传承，美院的莘莘学子必将勇于担当。此谓行健…
354	China Jiliang University	精思国计、细量民生	PROF; MOR3; PROF; MOR3	“精”与“细”是计量科学和事业的追求目标。“思”与“量”，前者体现高校知识群体的行为共性，后者体现与学校专业相关的行为特点。 “精思”与“细量”，是将具体行为与计量的追求目标有机结合，提升了行为的标准；“国计”与“民生”，泛指与国家、民众相关之事，通过将行为对象由专业向社会的迁移，升华了行为的立意。 “精思国计”为“知”，体现了学校师生员工的精神境界；“细量民生”为“行”，体现了学校师生员工的务实精神。 “精思国计，细量民生”契合学校“计量立校、标准立人、质量立业”的办学理念，不仅字面上包含了校名，更蕴涵着高标准的行为方式、对社会的责任感和对事业的使命感，而这正是培养人才的根本目的。
355	Zhejiang Wanli University	自强不息、恒志笃行	WILL; ACT	语出《周易·乾》：“天行健，君子以自强不息。” 语出《礼记·儒行》：“儒有博学而不穷，笃行而不倦。” 学校全面贯彻党的教育方针，坚持社会主义办学方向，落实立德树人根本任务，坚守应用型的办学定位、服务型的办学追求、创业型的办学特色、国际化的办学特征，恪守“以生为本、以师立校、面向市场、国际接轨”的办学理念，弘扬“只要有1%的希望就要尽100%的努力”的万里精神和“自强不息、恒志笃行”的校训传统，充分发挥体制机制的创新优势，以特色鲜明高水平应用型大学建设为目标，着力形成以产科教融合、校政企协同、国际化合作、创新创业教育“四轮驱动”的办学格局。
356	Zhejiang University of Science and Technology	崇德尚用、求真创新	MOR0; ACT; SCH; INNO	“崇德”：“崇”，指推崇、尊崇、推重；“德”，指人的道德、德行、品质、品格。《尚书•周书•微子之命》：“惟稽古,崇德象贤。”《周易•系辞上》：“崇德而广业。”魏王弼注：“穷理入神，其德崇也；兼济万物，其业广也。”《礼记•王制》：“上贤以崇德。”我校秉持“崇德”精神，既尊承中华优秀文化传统，推崇“育人为本、德育为先”教育理念，悉心培育莘莘学子崇仰高尚道德之情怀，更突显学校致力于为祖国煌煌伟业培养输送更多德才兼备建设者接班人之根本办学目标。 “尚用”：“尚”，指尊崇、崇尚。《广雅》：“尚,上也。”“用”，指运用、应用。《说文》：“用，可施行也。”《周易•系辞上》：“备物致用，立成器以为天下利。”“尚用”也为宋代浙江思想家陈亮、叶适等人崇尚事功思想之精华，传承千载，绵延不绝，乃为今日浙江精神之渊源。我校秉持“尚用”理念，着意彰显崇实尚用、知行合一、学术愈精、能力愈强、应用愈广、贡献愈著之办学特…
357	Ningbo University of Technology	知行合一	ACT	学校以“知行合一”为校训，就是要继承中国优秀传统文化的精髓，弘扬学院严谨求实的办学传统，激励师生善于学习、勤于思考、敢于实践、勇于创新，实现理论与实践相统一、知识与技能相统一。 学校全面融入地方经济社会发展，通过推进产教融合、校企合作，为区域发展培养高层次的应用型人才、提供高水平的应用技术研究。学校弘扬“讲实求精”精神，践行“知行合一”校训，全方位、多层次构建高格调的校园文化，积极发挥环境育人的功能，努力营造特色鲜明、文明和谐、健康向上的校园文化氛围，全面提高学生综合素质。
358	Zhejiang University of Water Resources and Electric Power	博学求实	SCH; ACT	博于问学，笃于务实；多学真知，多干实事“博学”侧重学习，向各种人学，学各种知识；“求实”侧重实行，踏踏实实做事，老老实实做人。 学校精神自强、务实、尚德、求真自强，反映学校六十多年来坎坷办学，艰苦奋斗，不断进取。 务实，与水利行业精神相衔接，反映水利人朴实无华的作风。尚德，反映学校师生崇尚品德修养。求真，体现工科院校崇尚科学，追求真理的认真负责的态度。 学校秉持“博学求实”校训，弘扬“自强、务实、尚德、求真”精神，深入推进以水育人、以文化人，持续深化校园文明创建及文化传承创新，推动文化育人历久弥新。
359	Zhejiang University of Finance & Economics	进德修业,与时偕行	MOR0; PROF; ACT	语出《易经》乾卦，具有深厚的历史底蕴，充分体现了对“修身、齐家、治国、平天下”这一中国传统文化的历史传承，也充分体现了学校对“立德树人”的不懈追求。“进德修业”，要求百年树人、德育为先，倡导教师身正为范、学高为师，学生品学兼优、德才兼备。“与时偕行”，要求顺应时代发展的潮流，坚持改革开放、勇于开拓创新，努力走在高等教育发展的前列。
360	Zhejiang Police College	忠诚、严谨、团结、献身	MOR3; DIL; MOR2; MOR3	“忠诚”意味着为了正义的事业无条件地付出自己的一切，全方位精准打击敌对势力，不遗余力地匡扶正义正气，竭尽全力、肝脑涂地、使命必达。这个词语出自《忠经》，表达了忠诚、中正、无私的品质。 “严谨”则是指态度严肃谨慎，追求完美和注重细节。这个词语出自宋代欧阳修的《尚书工部郎中欧阳公墓志铭》，体现了对学术和工作的严谨态度。 “团结”是由多种情感聚集在一起而产生的一种精神，真正的团结是无条件的配合。团结并不只存在于志同道合中，想要成为一个团结优秀的集体，需要真诚地面对集体中的每一个人，让这个集体里的每一个人都感觉到心灵的温暖。 “献身”则是将自己的全部精力和生命献给祖国、人民或事业。这个词语表达了为国家和人民的事业奉献自己的全部力量和生命的决心。 综上所述，浙江警察学院的校训强调了对国家、人民和正义事业的忠诚、严谨和献身精神，同时也注重团结和合作的重要性。 这个校训的出处涵盖了古代的文献和思想，以…
361	Quzhou University	立心力行	WILL; ACT	吾校以“立心力行”为训，旨在勉励师生校友及后来者发奋求学、勤勉做事、做顶天立地人。 “立心”二字选自北宋张载《近思录》：“为天地立心，为生民立命，为往圣继绝学，为万世开太平”。 唯望诸位师生校友仰望星空，胸怀理想，诚信明理，存仁义之心，涵包容大爱，负天下兴亡之大任。 “力行”二字选自南宋朱熹《朱子语类》：“致知力行，论其先后，固当以致知为先；然论其轻重，则当以力行为重”。唯望诸位师生校友脚踏实地、勇于实践，自信而不自负，谦虚而不骄傲，铁肩担道义，妙手著文章，养浩然之气，成有用之材，行内圣外王之道。
362	Ningbo University	实事求是、经世致用	ACT; MOR3; ACT	首任校长朱兆祥认为，一所新建大学只有提炼和努力打造自己的品牌特色，营造浓郁的人文氛围，才能真正发挥大学的职能。大学精神的形成，首先要设立宗旨、校训。宁波是历史上著名的“浙东学派”和“宁波帮”的发源地。“浙东学派”以“注重研究史料和通经致用”享誉史学界。“宁波帮”是对近代大批宁波人漂洋过海到世界各地，尤其是港澳台地区创业，取得辉煌成绩的美称。“宁波帮”商业巨头大都出身贫寒，以诚信、经世致用起家。“求是”是“浙东学派”的传统，“诚信”“经世致用”是“宁波帮”的气质。在宁波长大的朱兆祥非常仰慕这种精神。在宁大开学不久的校长办公会议上，他提议将“实事求是，经世致用”作为宁大的校训。2008年3月，学校正式确定“实事求是，经世致用”为宁波大学校训。 宁波大学校长沈满洪认为，“实事求是，经世致用”的宁大校训，蕴含了治学的目的、方法与价值，体现了宁大人的理想、信念与追求，表达了宁波大学办学的历史使命感…
363	Communication University of Zhejiang	敬业、博学、求真、创新	PROF; SCH; SCH; INNO	敬业：勤勉笃实，爱岗奉献；潜心学术，诲人不倦；勤奋刻苦，学而不厌。 博学：博于问学，追求新知；虚怀若谷，求知若渴；刻苦钻研，锲而不舍。 求真：上下求索，献身真理；感悟理性，严谨务实；知行并重，求做真人。 创新：审时度势，引领潮流；除弊兴利，革旧布新；志存高远，与时倶进。
364	Hangzhou City University	求是	SCH	“求是”，语出《汉书》“修学好古，实事求是”，意为博学求知，探索规律，追求真理。 1. 求是创新 明德笃行 “明德”一词出自《大学》首句：“大学之道，在明明德，在亲民，在止于至善”；“笃行”一词出自《礼记·儒行》：“儒有博学而不穷，笃行而不倦”。 2. 求是创新 明德笃学 “明德”一词出自《大学》首句：“大学之道，在明明德，在亲民，在止于至善”；“笃学”一词出自《论语.泰伯》：“笃信好学，守死善道”。 3. 求是创新 励学敦行 “励学”一词出自《励学篇》：劝勉人勤奋学习；“敦行”一词出自《礼记·曲礼上》：“博闻强识而让，敦善行而不怠，谓之君子”。 4. 求是创新 自强弘毅 “自强”一词出自《易·乾·象》：“天行健，君子以自强不息”。“弘毅”一词出自《论语·泰伯》：“士不可以不弘毅，任重而道远”。 求是创新 “求是”，语出《汉书》“修学好古，实事求是”，意为博学求知，探索规律，追求真理；“…
365	NingboTech University	明德弘毅、开物启新	MOR0; MOR1; PROF; INNO	明德：“明”，一为明白、清楚，二为懂得、了解，三为弘扬、彰显；“德”，指品行、品质、道德。即认同、践行和彰显美德。《大学》开首即云：“大学之道，在明明德，在亲民，在止于至善”。“德育为先”，是中国当代社会对教育功能的普遍认知和期待，也是大学的精神和价值追求。同时，它暗示了宁波的古称——明州。 弘毅：出自《论语·泰伯》，原文是：“曾子曰：士不可以不弘毅，任重而道远。”曾子就是孔门弟子曾参。根据南宋朱熹的解释：弘，宽广也，毅，坚忍也，非弘不能胜其重，非毅不能致其远。这意味着一种以宽广的胸怀和眼界、以坚忍的意志和毅力，去面对人生的态度，只有这样，才有可能实现远大的理想和抱负。同时，还意味着知识分子对于社会的责任感、以天下为己任的自信心。 开物：出自《易·系辞上》：“夫《易》开物成务，冒天下之道，如斯而已者也。”开：开通，了解；务：事务。意即：通晓万物的道理并奉行而得以成功。孔颖达 疏：“言《易…
366	Hangzhou Medical College	求真、博爱	SCH; MOR3	求真： "真"是指自然界的根本法则" 。“求真”就是尊重科学、追求真理。 “真”也是指社会的至高境界。“求真”即尊尚真诚，做“学以至理、行以至诚”、 求真务实的人。 博爱： 博爱是指医学以“仁”为核心的基本理念。 医学就是要培养“博爱互助”的人道主义精神和“博爱奉献的“敬业精神。 作为一名医学事业者，只有具备 “爱众亲仁”品德，才能真正实践“救死扶伤、治病救人”办人民满意的医学高等学校的宗旨。
367	Huzhou College	求真鼎新	SCH; INNO	校训征集启事：为顺应高等教育内涵发展的要求，增进一步凝练学校办学理念和办学特色，提升大学文化的向心力，凝聚全校师生员工的文化共识、育人共识，强文化自信，决定面向全社会公开征集湖州学院校训。 一、征集对象 本校全体师生员工，离退休教职工，校友，以及关心、支持湖州学院发展的社会各界人士。 二、作品要求 1、校训是学校历史和文化的积淀，是学校精神和灵魂的象征，是对学校办学传统、办学理念、办学特色的高度凝练和概括，是要求全体师生共同遵循的内在行为准则。本次校训征集，一要体现中国特色社会主义大学的历史使命，二要注重中国优秀传统文化中的凝练，三要体现学校的历史传承和办学特色，四要充分展现时代特征和国际视野。 2、校训表述要考虑校训的使用和呈现，字数不宜过多，力求使校训“言简意赅、辞精意达、融古通今、涵义深远、特色鲜明”。 3、作品需附对校训内涵的具体解释说明。 4、作品一经采用，其著作权、解释权、使…
368	Wenzhou University of Technology	厚德浚智,循理精工	MOR0; SCH; SCH; PROF	温州理工学院秉承“厚德浚智，循理精工”的校训，立足温州、面向全国、接轨国际，切实发挥文化引领、人才支撑、科技支持作用，努力成为温州城市发展的动力源、创新人才的孵化器、高等教育的金名片。
369	Jiaxing Nanhu University	守正创新、求实奋进	MOR1; INNO; ACT; WILL	学校坚决扛起守好“红色根脉”的政治担当，围绕“红色基因、创新发展、协同共赢、立德树人”这一主线，实施“红船引领型大学”“城市共生型大学”和“产业伙伴型大学”三大战略，构建“1226”建设工程，大力弘扬伟大建党精神和红船精神，践行“守正创新、求实奋进”校训精神，踔厉奋发、笃行不怠，致力于建设成为特色鲜明、国内一流的应用型本科高校。 2003年，嘉兴学院南湖学院在红船起航地——嘉兴南湖之畔成立，而今，南湖学院迎来十五华诞。 十五年来，学院秉承母体嘉兴学院“方正为人、勤慎治学”的校训精神，励精图治，为国家培养了两万余名本科应用型人才。
370	Zhejiang International Studies University	明德弘毅、博雅通达	MOR0; MOR1; SCH; ACT	校训的文化精神和大学使命、大学文化紧密联系在一起，体现了大学教育立德树人的核心使命和根本任务。“明德弘毅、博雅通达” 作为浙江外国语学院的校训是浙外办学理念、治校精神的高度凝炼，也是浙外人共同的价值追求。 “明德”出自《大学》：“大学之道，在明明德，在亲民，在止于至善。”两个“明”，词性不同，前面的“明”是动词，后面的“明”是形容词。校训中“明德”的“明”为动词，意指“彰显”“发扬光大”。学校致力于培养国际化应用型人才，应彰显人类美好的德行。“弘毅”出自《论语》：“士不可以不弘毅，任重而道远。”“弘”是“大”的意思，“毅”是“坚毅”的意思。“弘毅”是指抱负远大，意志坚强，作为知识分子应该有远大的志向，要坚强。“博雅”出自《楚辞·招隐士》王逸《章句》：昔淮南王安，博雅好古，招怀天下俊伟之士。”“博”是“广”的意思，“雅”是“正”的意思。“博雅”是指学识渊博、纯正。“通达”出自儒家经典《学记…
371	Zhejiang Conservatory of Music	事必尽善	MOR1	学校秉承李叔同“学堂乐歌”文化传统，践行“事必尽善”校训，立足浙江，面向全国，致力于建成高水平一流音乐院校。 “弘毅”词义为志存高远、坚韧刚毅。非弘不能胜其重，非毅无以致其远，唯有宏大之格局、坚韧之品格、仁道之精神，方能攻坚克难、担当重任。 “尚德”词义为彰明伦理、崇尚德行。百行以德为首，厚德方以载万物，唯有德艺双馨、德为艺先，方能行稳致远。尚德也与校训“事必尽善”相呼应，在精神层面倡导崇德向善。 “博约”词义为博学于文、约之以礼。学海无涯，做学问当要博览群书、善采众长，学会博观约取、厚积薄发；立身行己，做人当要求真务实、虚怀若谷，学会恪守礼法、正己化人。 “精艺”词义为精进技艺、打磨精品。艺无止境，文艺工作当有精耕细作、精益求精的艺术境界，为人民立传、为时代放歌，努力创作思想精深、艺术精湛、制作精良的精品力作。
372	Zhejiang Pharmaceutical University	厚德厚朴,励志远志	MOR0; MOR1; WILL; WILL	学校坚定职业本科教育类型定位，坚守医药行业办学特色，坚持产教融合办学路径，秉承“厚德厚朴、励志远志”的校训精神，凝练“职教本色、医药底色、监管特色”“三色”专业发展特色，构建“厚药德、明药规、强药技、懂智造、接国际、能创新”的“三色·三药·三能”职业本科人才培养模式。 学校坚持立德树人，坚定职业本科教育类型定位，坚守 医药行业办学特色，坚持产教融合办学路径，秉承“厚德厚 朴 励志远志”校训精神，培养德智体美劳全面发展高素质 医药类技术技能人才，致力打造医药特色鲜明的一流职业本 科大学。
373	Anhui University	至诚、至坚、博学、笃行	MOR1; DIL; SCH; ACT	此8字中，有6字出自《礼记·中庸》。“至诚”是传统儒家的最高道德境界；“博学”“笃行”则被注为“诚之目”，是达到“至诚”境界的行为指南。“至坚”2字提炼自学校乃至时代对人的品格要求，同是达到“至诚”境界不可或缺的意志力因素。就今天来说，“至诚至坚”是指以诚实、诚信和坚毅、坚定为目标的人生修养过程，可视为对人“德”的要求；“博学笃行”是指以渊博、深厚和笃实、诚笃为指标的学行态度，可视为对人“才”的要求。“至诚至坚，博学笃行”8字联系起来解读，虽不外乎“德才兼备”的意思，但通过对“诚”“坚”“博”“笃”的强调，突出了对学习目的实践和对人成才的道德要求。
374	University of Science and Technology of China	红专并进，理实交融	MOR3; PROF; SCH; ACT	1958年建校之际，郭沫若校长亲自起草校歌《永恒的东风》歌词，并请校歌谱曲者吕骥先生到校教唱。从此，校歌中“又红又专，理实交融，团结互助，活泼英勇”的句子在全校师生中广为流传。 1959年开学典礼，郭老以《勤奋学习，红专并进》为题作长篇演说，将中国科大校风概括为“勤俭办学，艰苦朴素，红专并进，团结互助”，要求同学们坚决把抗大精神继承下来，“不仅要创建校园，而且要创建校风，将来还要创建学派”。 1988年9月20日，名誉校长严济慈在庆祝建校30周年大会讲话中指出：“建校以来，老校长郭沫若倡导建立了‘勤奋学习，理实交融，红专并进’的优良校风”。这是对郭老在中国科大创办初期不同场合关于校风提法的进一步概括，同时也是根据学校建设和发展实际对校风、校训作的新的提炼。 2003年9月，时任校党委书记郭传杰在纪念校庆45周年《思贤哲，学校训，创一流》一文中指出：“我们科大的校训‘红专并进，理实交融’，…
375	Hefei University of Technology	厚德、笃学、崇实、尚新	MOR0; SCH; ACT; INNO	厚德，为开阔、大度、包容之意（见《易经》“地势坤，君子以厚德载物”）；笃学，意为致志专心（见《三国志》之《孙瑜传》中“笃学好古”）；崇实，即为实事求是之意；尚新，为在推究（调查研究）事务（学术）的原理上开拓创新，提出科学可行的理念。
376	Anhui University of Technology	精工博学、厚德敏行	PROF; SCH; MOR0; ACT	精工：语出《后汉书·宦者传·蔡伦》：“监作秘剑及诸器械，莫不精工坚密，为后世法。”原意为精致工巧，引申为掌握精湛技艺、具有科学精神。以此为训，旨在彰显我校以工为主的学科特色，激励广大师生立足夯实基础、强化实践、注重创新，面向经济建设主战场培养高级应用型人才的人才培养特色，凡事精益求精，始终追求卓越，致力善做善成。 博学：语出《论语·子罕》：“大哉，孔子！博学而无所成名。”指学识渊博。《礼记·中庸》（“博学之，审问之，慎思之，明辨之，笃行之。”）将其作为治学求进之首，意为广泛地学习。以此为训，旨在激励师生广博地获取知识，培养充沛而旺盛的好奇心，实现学识渊博、学以致用的求学、治学目标。 厚德：语出《易·坤》：“地势坤，君子以厚德载物。”指大德，意为道德高尚者能担当重任（其他含义略）。以此为训，旨在倡导师生致力于教书育人、立德树人，追求高尚品德，涵养完善人格，养成和谐心灵，培育宽广心胸，成为可…
377	Anhui University of Science and Technology	团结、奋进、博学、奉献	MOR2; WILL; SCH; MOR3	“八字”校训体现了为人与为学的统一、做人与做事的统一、追求真理与服务社会的统一，反映了学校的办学理念和治校精神，既具有鲜明的时代特色，又具有深厚的文化内涵。 “团结”即集中力量实现共同理想或完成共同任务而联合或结合。团结是生产力，团结是凝聚力，学校应该是和谐统一的有机体。它强调以人为本，人与人之间和睦相处，共建和谐校园。它要求学习和工作中发扬团队精神，为了共同的理想和目标而精诚合作、和衷共济。 “奋进”即奋勇前进。《周易》曰：“天行健，君子以自强不息”，它体现了强烈的进取精神和顽强的拼搏精神。它要求师生胸怀祖国，放眼世界，志存高远、追求卓越，奋发图强，自强不息，不断促进个人、学校和社会的发展。 “博学”即学问广博精深。《礼记·中庸》云：“博学之，审问之，慎思之，明辨之，笃行之。” 它强调为学须在理论知识和专业技能上博古通今、学贯中西、博采众长，求真务实、不断创新。它既意谓着为学要广泛猎取…
378	Anhui Polytechnic University	尚德敏学、唯实惟新	MOR0; SCH; ACT; INNO	学校始终把立德树人作为根本任务，坚持“质量立校、人才强校、特色与和谐兴校”的办学理念和“诚实做人、踏实做事、扎实做学问”的育人理念，以“三抓”工作为统领，深入推进“三全六专”育人实践，积淀出“雨耕勤作赤铸精工”的大学精神和“尚德敏学唯实惟新”的校训，坚持走以提升质量、打造特色为核心的内涵式发展道路，积极培养德智体美劳全面发展，具有社会责任感、创新精神、创业意识和实践能力的高素质应用型人才，形成了“以工为主、支撑产业、服务地方”的办学特色。
379	Anhui Agricultural University	团结、勤奋、求实、创新	MOR2; DIL; ACT; INNO	团结：联合起来以完成共同目标；勤奋：坚持不懈地（工作或学习）；求实：讲求实际。 客观地或冷静地观察以求得对客观实际的正确认识；创新：以新思维、新发明和新描述为特征的一种概念化过程
380	Anhui Medical University	好学力行,造就良医	SCH; ACT; PROF	著名教育家蔡元培先生分别于1933年、1934年为我校前身东南医学院题词“好学力行”、“造就良医”。2006年，我校80周年校庆之际被确定为校训。 安医精神：弘毅担当、精医报国、康民济世。 2019年12月底，学校召开了第八次党代会，以深邃的视野洞察学校的昨天、今天、明天，系统凝练出以“弘毅担当、精医报国、康民济世”为内核的安医精神，树立起学校近百年奋斗形成的又一价值坐标。回望历史，一代代安医人以胸怀梦想、革新创造的宏大气魄，弘毅担当、百折不挠，彰显了安医精神的精髓；以精医报国、康民济世的矢志追求，传承着“爱国爱民，献身人类健康”的光荣传统，彰显了安医精神的灵魂；把立德树人作为根本任务，秉持着“兴国、奉献、仁爱”的育人理念，彰显了安医精神的核心；把为党育人、为国育才作为初心使命，践行着“好学力行，造就良医”的校训精神，积淀了“厚德至善、博学济世”的校风，“崇教、乐教、善教”的教风和“求真…
381	Bengbu Medical University	笃学、精业、修德、厚生	SCH; PROF; MOR0; MOR3	笃学—专心致志，追求新知，勤奋努力，严谨治学。 精业—爱岗敬业，精通专业，孜孜不倦，精益求精。 修德—修身立德，明礼诚信，医学教育网搜集|整理砥炼意志，提高素养。 厚生—以生为本，关爱学生，精诚济世，厚待生命。 66年来，学校大力弘扬“艰苦创业、严谨治学、精诚为医、团结奉献”的蚌医精神，秉承“笃学、精业、修德、厚生”的校训，传承上二医优良传统，在长期办学实践中，逐步凝练出“固本守教、教授施教、传帮带学、反复实践”的人才培养理念。
382	Wannan Medical College	精医、尚德、求实、自强	PROF; MOR0; ACT; WILL	精医是对从医者的职业要求，对业务要精益求精； 尚德是道德标杆，要成为有高尚医德的人，才能承担起救死扶伤的神圣职责； 求实是对人对事要有事实求是的科学态度和方法； 自强是要求要不断进取，成为一个自强自立的人。 自办学以来，学校秉承“精医、尚德、求实、自强”的校训，发扬“艰苦创业、求实自强、奉献社会”的皖医精神，形成了优良的办学传统。站在新的历史起点，学校将以习近平新时代中国特色社会主义思想为指导，聚焦“国内有影响、特色鲜明的区域性高水平医科大学”发展目标定位，深入贯彻创新、特色、应用、开放、协同发展导向，深化质量立校战略、学科引校战略、特色兴校战略、人才强校战略、依法治校战略、文化荣校战略，推进政治领航工程、思想强基工程、组织赋能工程、作风锻造工程、纪律固堤工程，实施培根铸魂行动、专业培优行动、学科攀登行动、人才聚力行动、医教协同行动、管理提质行动、文化育人行动、幸福皖医行动，全面提升办学…
383	Anhui University of Chinese Medicine	至精至诚、惟是惟新	DIL; MOR1; SCH; INNO	至精至诚：学校的育人理念。取意“大医精诚”，培养医术精湛和品德高尚的学生。 惟是惟新：学校的发展理念。以改革、创新的精神，思考中医发展规律，谋划学校发展大事。校训标准字体采用中国北宋书法家、画家、书画理论家米芾手体。
384	Anhui Normal University	厚德、重教、博学、笃行	MOR0; PROF; SCH; ACT	厚德，语出《周易﹒坤卦》“地势坤，君子以厚德载物”。意在彰显学校厚重质朴、至善致远的优良品质，期望师生员工砥砺德行，以高尚的道德立身，以博大宽广的胸怀（大德）承载天下重任。 重教，指尊教、重教、爱教、乐教、善教，意在弘扬根植于深厚的民族文化土壤、形成于安徽浓郁的教育历史人文背景和尊师重教优良传统，倡导学校教师以教师教育为主的办学特色定位和“以生为本、以师为先”的办学理念。 博学，语出《论语﹒子张》：“博学而笃志，切问而近思。”意在秉承皖学严谨朴实、求是创新的学风，勉励师生员工勤奋学习，博采众长，放眼世界，兼容并包，追求广博的学识和渊博的学问。 笃行，语出《礼记﹒中庸》“博学之、审问之、慎思之、笃行之。”意在弘扬“知行合一、自强不息”的精神，引导师生员工学以致用，身体力行，崇尚实干。 “厚德”突出了德育为首的教育理念；“重教”强调的是办学特色、办学理念；“博学”是求学、治学的目标、方法；“…
385	Fuyang Normal University	厚德、博学、自胜、勤行	MOR0; SCH; WILL; DIL	“厚德”出自《周易》：“地势坤，君子以厚德载物”，意谓：大地的气势厚实和顺，君子应增厚美德，容载万物。老子在《道德经》中指出：“修之于身，其德乃真。”强调“德”是立命、处人、治世的关键所在。以“厚德”作为校训，意在期望师生员工以“德”作为修身目标，以德立身，以德施教，以德治校。 “博学”语出《论语·子张》:“博学而笃志,切问而近思”以及《论语·雍也》“子曰：‘君子博学于文，约己以礼，亦可以弗畔矣夫！’”，《荀子·劝学》中也说：君子博学而日参省乎已，则知明而行无过矣。以此作为校训就是倡导师生员工努力学习，博采众长，追求广博的学识和渊博的学问。 “自胜、勤行”语出老子：“知人者智，自知者明。胜人者有力，自胜者强。知足者富，强行者有志”，“上士闻道，勤而行之”，是传统道家文化关于修身的经典论述，也内涵着自强不息、敬业好学的语义。使用这两个词的组合，一方面在提法上较新，与其他学校没有重合的现象；…
386	Anqing Normal University	敬敷、世范、勤学、笃行	MOR3; PROF; SCH; ACT	始终紧扣立德树人根本任务，大力弘扬“敬敷、世范、勤学、笃行”校训精神，深入实施修德、修智、修行“三修”教育工程，促进学生成长、成人、成才、成功。
387	Huaibei Normal University	博学、慎思、励志、敦行	SCH; REAS; WILL; ACT	历经近50年的建设与发展，学校始终不忘立德树人初心，牢记为党育人、为国育才使命，坚持追求卓越的改革创新精神，厚植服务基层、奉献教师教育的情怀，培养造就了情怀深厚、专业硬核、甘于奉献、扎根基层、具有高度社会责任感的高素质、专业化人才。经过一代又一代淮师人的不懈努力，铸就了“艰苦奋斗、持之以恒、甘于奉献、追求卓越”的淮师大精神和“博学、慎思、励志、敦行”的校训。
388	Huangshan University	教人求真，学做真人	MOR1; MOR1	学校秉承陶行知先生教育思想，确立“教人求真，学做真人”的校训，倡导求真求实的办学精神，推进转型发展。持续推进专业结构优化调整。
389	West Anhui University	厚德尚能、博学创新	MOR0; PROF; SCH; INNO	“厚德”放在首位，是要求我院教职工既要具备中华民族传统美德，又要顺应时代潮流，按照《公民道德建设纲要》的要求，朝着以德治院的方向努力。“尚能”，是适应新世纪培养高素质人才的需要，加强对学生的实践能力和综合素质的培养，使其成为适应社会主义市场经济需要的能力强、素质高的应用型、技能型人才。“博学”是适应知识经济和信息化时代的需要，要求全院师生与时代发展同步，具备渊博的学识、广博的见闻，在实践中按照规律办事，格物致知、明理究难、科学严谨，成为学习型社会的推动者和构建者。“创新”，是国家和民族进步的不竭动力，也是我院永葆生机和活力、实现跨越式发展的强大动力。为适应地方经济和社会发展的需要，我院既要成为学生学习科学知识的重要场所，又要成为培养、提升学生实践和创新能力的重要阵地，从而使他们适应市场经济激烈竞争，在走向社会后能得以立足和不断发展，并对祖国和人民做出应有的贡献，从而也使我院的办学指导思想…
390	Chuzhou University	修德、求是、博学、笃行	MOR0; SCH; SCH; ACT	“修德”，即做人之本，应努力提高道德修养，养成良好的言行习惯。 “求是”，即勇于追求真理，探索规律。 “博学”，即广泛地学习各类知识。 “笃行”，即强调重视实践，实现知行统一。
391	Anhui University of Finance and Economics	诚信博学、知行统一	MOR1; SCH; ACT	弦歌不辍,桃李芬芳。60年来,学校始终秉承“诚信博学、知行统一”的校训精神,诚信立人、博学笃志、知行合一、得到功成,形成了鲜明的办学特色,在人才培养、科学研究、社会服务、文化传承创新等方面成绩显著。 学校始终坚持落实立德树人根本任务,探索形成知识探究、能力提升、素质培养、人格养成“四位一体”育人体系,已为国家培养高等专门人才近11万名,其中包括大批高层次管理人才和卓越财经英才。安财校友已成为各行各业的骨干和中坚力量,为国家和安徽省经济社会发展作出了重要贡献。
392	Suzhou University	友善、博学、务实、奋进	MOR1; SCH; ACT; WILL	友善：属于道德伦理范畴，指人际交往中遵循的友爱和善的道德取向。语出《汉书·息夫躬传》。友善不仅是高尚心灵、美好修养的前提，也是启益智慧的重要途径。以友善之心处理人际关系，是建设和谐社会和谐校园的根本要素。 博学：是对知识、智慧方面的要求，既是行为准则，也是行动目标。一为动词，典出《礼记·中庸》及《荀子·劝学》，意为广泛学习，全面发展，侧重于学习过程、学习方法。一为形容词，语出《论语·子罕》，意为学识渊博，侧重于学习的目的、境界。二重含义，互为表里，互为因果。 务实：是观念和作风方面的准则，是为学、行事、做人得以成功的必要条件。语出《国语·周语》，本意谓讲究实际，后引申为致力于具体实在的事情。这里是指马克思列宁主义、毛泽东思想、邓小平理论中的实践检验真理、实事求是观点的体现。 奋进：是人生观、事业观的积极价值取向。语出曹植《蝉赋》，用作校训，指努力上进、立志有所作为的人生态度和工作精神。 …
393	Chaohu University	德学并举、知行合一	MOR0+SCH; ACT	德行并举：指道德和品行，要齐头并进。 知行合一：是指客体顺应主体，知是指科学知识，行是指人的实践，知与行的合一，既不是以知来吞并行，认为知便是行，也不是以行来吞并知，认为行便是知。是明朝思想家王守仁提出来的。谓认识事物的道理与在现实中运用此道理，是密不可分的一回事。是指中国古代哲学中认识论和实践论的命题，主要是关于道德修养、道德实践方面的。中国古代哲学家认为，不仅要认识（“知”），尤其应当实践（“行”），只有把“知”和“行”统一起来，才能称得上“善”。
394	Huainan Normal University	明德、至善、博学、笃行	MOR0; MOR1; SCH; ACT	学校秉持“立德树人、知行合一、学以致用”的办学理念，坚持以教学工作为中心，以高素质应用型人才培养为目标，着力实施本科教学工程，努力打造一流本科专业。
395	Tongling University	明德、尚能、博学、日新	MOR0; PROF; SCH; INNO	“明德”语出《大学·第一章》:“大学之道,在明德,在亲民,在 止于至善。”寓意要学到高层次的学问,就必须把求真求实的科学精神与 求善求美的人文精神相结合。“尚能”,崇尚能力,培养技能,通过加强 对学生实践能力和动手能力的培养,不断提高学生的本领;“博学”取自 《中庸》:“博学之,审问之,慎思之,明辨之,笃行之。”它寓意要树 立起博学多识,兼容并包,融贯中西的学风。“日新”取自《礼记·大 开拓。
396	Anhui Jianzhu University	进德、弘毅、博学、善建	MOR0; MOR1; SCH; PROF	校训的出处 进 德：出自《周易 乾 文言》。原文是：子曰“君子进德修业，忠信，所以进德也；修辞立其诚，所以居业也”。“进德”的意思是：“君子致力于培育品德，增进学业。” 弘 毅：出自《论语》。原文是：曾子曰：“士不可以不弘毅，任重而道远”。“弘毅”的意思是“胸怀宽广、抱负远大；坚强刚毅、自强不息”。 博 学：出自《礼记 学记》，原文是“博学而不穷，笃行而不倦”。意思是广泛地学习永不满足，身体力行永不懈怠。 善建：出于《道德经》第五十四章，原文是“善建者不拔、善抱者不脱”。“善建者不拔”的意思是善于建筑者，能使建筑物不会倒塌。 校训的涵义 用“进德 弘毅 博学 善建”作为我校校训富有哲理，寓意深刻。 1、体现了“学校育人、育人为本；德智体美、德育为先”的共性特点和安徽建筑工业学院“依托建筑业、服务城镇化”办学定位的个性特点。 2、体现了对学子寄予的厚望。大学生正处在学习知识、磨练意志、培养…
397	Anhui Science and Technology University	明德、致知、笃行、创新	MOR0; SCH; ACT; INNO	明德--国以德兴，人以德立；厚德载物，修齐治平；志存高远，砥砺德行。 致知--格物致知，探本究源；博学审问，慎思明辨；求真务实，勤耕不辍。 笃行--崇实尚行，学以致用；躬身实践，守笃精进；学思践悟，知行合一。 创新--社会发展，源于创新；勿守残缺，存疑善问；追求卓越，永无止境。
398	Hefei University	厚德、博学、善思、致用	MOR0; SCH; SCH; ACT	“厚德博学，善思致用”的校训，作为合肥学院全体师生员工的行为准则、动力之源和奋斗目标，突出了学院人才培养目标，概括了学院的办学理念和定位，反映了师生的共同愿望和要求，是继承与创新的统一、共性传承与个性张扬的统一。
399	Bengbu University	笃学、重行、修德、立才	SCH; ACT; MOR0; PROF	笃学：笃，专心、坚定。笃学，即专心致志地学习。要志于学、专于学、厚于学，力戒浮躁虚荣，专心致志、老老实实、勤勤恳恳，在知识与技能上实现厚积厚载。 重行：行，行动、实践。重行，即重视实践、重在实践。没有专心致志、勤奋刻苦的学习行动，无以获得真知；只关注书本知识、不重视专业技能，就不能获得为社会服务的实际本领；掌握了知识和技能，不投身实践、学以致用，就不能实现社会价值。 修德：修，学习、培养、锻炼。修德，即通过学习与道德实践，不断提升道德品质与思想境界。在学习科学知识和专业技能的同时，要不断追求崇高的精神境界，自觉遵守社会道德规范，努力养成深厚的文化素养和高雅的情趣，才能成为德智体美全面发展的高素质人才。 立才：立，站立、树立，成为、成就。立才，即成为能够立足社会、服务社会的有用人才。成才，才能立足于社会；立足社会、服务社会，才能实现人生价值和社会价值，成为社会主义现代化事业的合格建设者和可…
400	Chizhou University	以孔子为师，以行知为友	MOR1; SCH; ACT; SCH	校训“以孔子为师，以行知为友”，是池州学院办学理念、办学目标、办学特色和文化精神的集中表述，是学校勉励师生积极进取、健康成长的格言。“以孔子为师”，即传承孔子的教育思想和理念，表现了学校注重从中国传统文化尤其是孔子儒家教育思想中汲取智慧，做到古为今用，强调以“道”（人生理想）为目标，以“德”（德性教化）为依据，以“仁”（关爱奉献）为依靠，以“艺”（文化专业学习）为内容。“以行知为友”，即秉承陶行知先生“知行合一”的教育思想，从求真、求实、求新、求活的教育理念中，寻求学校内涵发展、转型发展、特色发展的教育启示，推进学校改革创新。“以孔子为师，以行知为友”校训契合了学校的办学实际，学校在人才培养过程中，注重以生为本，注重博学重行，注重以用为先，注重传承创新，充分体现了学校追求传统与现代、理论与实践、继承与创新相结合的教育理念与大学精神。
401	Hefei Normal University	爱满天下、知行合一	MOR3; ACT	“爱满天下，知行合一”是“伟大的人民教育家”陶行知先生教育思想的精髓。爱满天下，体现的是一种爱祖国、爱人民、爱教育、爱学生的大爱精神和博爱情怀，是陶行知先生毕生追求的教育真谛。爱是教育的灵魂和生命。把“爱满天下”作为校训，既体现了以德立教、以爱施教的教育理念，也体现了立教为公、服务社会的使命意识和责任意识，体现了我校落实“师范性”办学定位的本质要求。 知行合一，源自于明代王守仁的《传习录》：“知之真切笃实处，即是行。行之明觉精察处，即是知。知行工夫，本不可离。……真知即所以为行，不行不足谓之知”。陶行知先生特别强调“行是知之始，知是行之成”。“知行合一”在本质上强调的是理论与实践的统一。以“知行合一”为校训，意在激励全校师生员工既要追求真理、善于学习，又要勇于实践、敢于创新。这是我校落实“应用型”办学定位的必由之路。
402	Anhui University of Arts	德艺双馨、知行合一	MOR0; PROF; ACT	学校坚持育人为本、德育为先、能力为重、全面发展的办学理念，倡导“德艺双馨、知行合一”的校训精神，全面实施以美育为特色的文化素质教育，深化教育教学改革，提高教育教学质量，为促进安徽创新型文化强省建设和加快建设现代化五大发展美好安徽提供人才支撑和智力支持。
403	Xiamen University	自强不息，止于至善	WILL; MOR1	“自强不息”是陈嘉庚先生创校时亮出的精神话语。1921年4月6日厦大举行开校式，演讲台中间就悬挂着陈嘉庚指定的四个大字——“自强不息”。“自强不息” 出自《周易•乾》的“天行健，君子以自强不息”，意味着追求永不歇止，蕴含着雄健浩然之气，体现了民族自立于世界之林的精神和气概。 “止于至善”为厦大私立时期的林文庆校长确立的校训。“止于至善” 源于《礼记•大学》“大学之道，在明明德，在亲民，在止于至善”， 意在表明厦门大学应该始终如一、永无止息地探寻“事理之极致”，抵达科学真理和人格精神的最高境界，在启智与道德上达到完美至善，体现了中国文化的人格理想，蕴含着生命对于至善至美理想的追求与践行。 1994年10月8日，经校党委校行政办公会议研究决定,“自强不息，止于至善”被正式确定为厦门大学校训。
404	Huaqiao University	会通中外、并育德才	SCH; MOR0; SCH	“会通中外”侧重于表达华大人应具有的国际视野和治学方法，意为汇合中外文化而贯通之，“并育德才”侧重于阐明办学方针，意指育德和育才不可偏废而应并重，使其相互促进。其内涵主要体现在：①传承民族精神。通过中华文化的教学和多种形式的渗透使民族精神得以继承和发扬。②融通多元文化。通过培育宽容为本、和而不同的校园精神，使两类学生都受到多元文化的感染和熏陶。③构架培养模式。通过独特的教学过程，因材施教，探索和完善适合“一校两生”特点的人才培养模式。④并育两生德才。通过教育，努力使境内外两类学生德才兼备，全面发展。
405	Fuzhou University	明德至诚,博学远志	MOR0; MOR1; SCH; WILL	明德： 大学之道，在明明德， 在亲民，在止于至善。(《大学》) 至诚： 唯天下至诚，为能尽其性， 能尽其性，则能尽人之性， 能尽人之性，则能尽物之性， 能尽物之性，则可以赞天下之化育； 可以赞天下之化育；则可以与天地参矣。 唯天下至诚，为能经纶天下之大经， 立天下之大本，知天下之化育。(《中庸》) 博学远(笃)志： 博学而笃志， 切问而近思， 仁在其中矣。(《论语》) 主要含义： 学校办学要以德在先，要发扬人们天赋的善良美德，以达到才德完美无缺的最高境界；培养人要以人为本，只有天下至诚之人才能治理天下的人伦纲常，树立天下的根本事业，懂得天地的变化繁育。 莘莘学子要勤奋、广博地学习，要树立远大的理想和志向，掌握知识报效祖国。
406	Fujian University of Technology	真、诚、勤、勇	SCH; MOR1; DIL; MOR1	此校训从1932年确定的福建高工校训变化而来 释义： 1、真：真实、真理、真心、认真； 2、诚：诚实、诚恳、诚信、忠诚； 3、勤：勤奋、勤俭、勤学、勤政； 4、勇：勇敢、勇毅、勇锐、勇进。 整个校训体现我校求真务实、学以致用、开拓创新的大学文化和校园风貌，师生员工在做人、做事、做学问过程中的科学态度和人文精神，体现了知行合一的实践准则以及对真、善、美的不懈追求。
407	Fujian Agriculture and Forestry University	明德、诚智、博学、创新	MOR0; MOR1; SCH; SCH; INNO	明德惟馨，厚德载物；诚以做人，智以处世；博学笃志，学以致用；勤奋进取，发明创新。
408	Jimei University	诚毅	MOR1; DIL	诚，源于《孟子》：“诚者，天之道也；思诚者，人之道也。” 毅，源于《论语》：“士不可以不弘毅，任重而道远。” 陈嘉庚曾有“诚信果毅”之语。 诚是教以做人的道理，毅是教以做事的道理。
409	Fujian Medical University	勤奋、严谨、求实、创新	DIL; DIL; ACT; INNO	“勤奋、严谨、求实、创新”是福建医科大学的准绳，一代代福医人薪火相传，将这八字校训镌刻于心，却鲜有人知道，校训来源于1987年,提出者是时任福建医大校长的殷凤峙。 而今，已是耄耋之年的殷凤峙老校长回忆起校训的诞生，言语间仍充满从容和自豪。 若“勤奋”是医学生涯中的针，“严谨”便是穿针的线1986年，殷凤峙出任福建医学院院长，同年他也是协和医院外科部“一把刀”。任职期间，殷凤峙深感一所大学不能没有校训，特别是一所医学院，更应该具备他应有的学风和全校师生共同奋斗的目标。于是在1987年，他提出了“勤奋、严谨、求实、创新”。他说这八个字是自己数十年从医生涯的总结，也是学校对莘莘学子的希冀，更希望是学子们成为医者后的一份承诺。 在殷校长看来，如果“勤奋”是医学生涯中的针，那“严谨”便是穿过针的线，一以贯之。身为医大人，日后面对病患的生命，容不得丝毫马虎。 “求实”便是实事求是。切实地诊断，实事求…
410	Fujian University of Traditional Chinese Medicine	大医精诚、止于至善	PROF; MOR1; MOR1	“大医精诚”出自唐代孙思邈的《备急千金要方》。“精”指熟练的专业技能，“诚”指高尚的道德品质，惟有医术精湛、医德高尚者方能称为“大医”。 “止于至善”出自《礼记·大学》：“大学之道，在明明德，在亲民，在止于至善。”“至善”追求的是完美的境界，是一丝不苟、精益求精、追求卓越的时代精神，正是大学精神之所在。 “大医精诚、止于至善”激励全校师生医护员工紧紧围绕“精诚”二字不懈努力，直至达到“至善”的最高境界，既体现了学校培养德才兼备中医药人才的特点，又突出了学校孜孜以求、不断进步的办学理念。
411	Fujian Normal University	知明行笃、立诚致广	SCH; ACT; MOR1; INCL	“知明行笃”语出朱熹《朱子语类》卷十四：“知之愈明，则行之愈笃；行之愈笃，则知之愈明。”朱熹认为：知行相须，不可偏废；相辅相成，相得益彰。明清之际的王夫之也曾提出“知行相资”之说。提出“知明行笃”作为校训内容的意义在于：１．知行问题历来是认识领域，也是教育领域的重要问题，陶行知等先哲对此有很多论述。毛泽东的《实践论》就是对古今中外知行关系的一个科学总结。２．我校培养的学生在知行关系上有优良传统，学生不仅勤于求知，而且身体力行，把认识和实践结合起来，我们要发扬这一传统。３．这是朱熹名言，朱熹是中国古代著名的思想家，又是“闽学”的创立者、福建的学术宗师，这也是一大特色。 “立诚”，语出《易经·乾卦·文言》：“修辞立其诚”。“立诚”的现代含意可引申为：一是对真理、对国家和民族的忠诚；二是真诚待人、强调诚信，一身正气、光明磊落。“致广”，语出《中庸》：“故君子尊德性而道问学，致广大而尽精微，极高…
412	Minjiang University	崇尚完美，追求卓越	WILL; WILL	“完美”是对人的道德素质的崇高要求，尽管世上难有“完美”之事，但作为一种追求的境界，“高山仰止，虽不能至，心向往之”！大而言之，让师生不断追求崇高的人生境界，不断完善自身；小而言之，一个人求知、为人、处事，讲求认真，一丝不苟，常怀“完美”之心，不懈努力，则离成功不远。古云：“取法乎上，仅得其中”。“卓越”即超然独立，高超出众之意。超越平庸，突显特色，成就自我。这八个字，体现美好、求新、向上、超拔的精神追求。
413	Wuyi University	涵养穷索、致知力行	MOR1; SCH; SCH; ACT	“涵养穷索”出自《朱子语类》“涵养穷索，二者不可废一，如车两轮，如鸟两翼”。“涵养”即修身养性，懂道理、明事理、知进退。“穷索”即苦心思索，反复探究。 “致知力行”出自朱熹《朱熹文集·答吕子约》“大抵学问只有两途，致知、力行而已”，《朱子语类》“致知力行，用功不可偏，偏过一边，则一边受病”。“致知力行”即致力于获取知识并努力付诸实践。 校训强调人的品德修养，重视孜孜不倦、反复探究的治学精神，正确看待知、行的相互关系——知行合一，致知力行，二者不可偏废。
414	Ningde Normal University	崇德、弘毅、厚学、笃行	MOR0; MOR1; SCH; ACT	崇德：意为以德立身，明德至善。崇德是为学之首、为人之本。倡导师生明大德、守公德、严私德，加强道德修养，注重道德实践，做到以德立身、育己育人。引证：《书经·武成》“惇信明义，崇德报功。” 弘毅：意为抱负远大，刚强勇毅。倡导师生志向远大、意志坚强，以实现中华民族伟大复兴为己任；发扬弱鸟先飞、滴水穿石的闽东精神，勇往直前、敢于斗争、坚韧不拔。引证：《论语·泰伯》“士不可以不弘毅，任重而道远，仁以为己任，不亦重乎？” 厚学：意为深入致学，学识深厚。厚学是学生的天职，也是教师的立身之本。倡导师生努力探索未知领域，下苦功夫求真学问，厚积而薄发，实现成长成才质的飞跃。引证：《庄子·逍遥游》“水之积也不厚，则其负大舟也无力。”和《论语·子张》“博学而笃志，切问而近思，仁在其中矣。” 笃行：意为践履所学、实学实干。笃行是为学的最后阶段，倡导师生扎扎实实干事，踏踏实实做人，于实处用力，从知行合一上下功夫，使…
415	Quanzhou Normal University	善学如泉、正心至大	SCH; MOR1	善学，语出《礼记.学记》：“善学者，师逸而功倍，又从而庸之”，指善于学习的人，老师很安闲，而教育效果反而加倍的好，学生更把功劳归诸于老师教导有方，这是增进学问的方法。老师受到尊敬，然后真理学问才会受到敬重。善学如泉，意为希望学生勤学、感恩、善于积累，如源泉般时时把握力量、知识、感情的来源；如泉水般清澈反观自己并端正前进的方向。 正心，语出《大学》:“古之欲明明德于天下者，先治其国。欲治其国者，先齐其家。欲齐其家者，先修其身。欲修其身者，先正其心。欲正其心者，先诚其意。欲诚其意者，先致其知。 ”正心，就是教人防止个人感情、欲望的偏向。正心所要达到的目的是把个人道德修养达到完善的地步，也是《大学》中讲培养人的最高要求。 “善学”和“正心”，契合大学精神的两个方面——知识的积累和人格的完善，也是每一个学生在大学里所应该学到的立身处世之根本，即拥有知识，拥有良好的道德修养。 “泉”和“大”，在这…
416	Minnan Normal University	博学、明理、砺志、笃行	SCH; MOR1; WILL; ACT	“博学”就是学识渊博，学问丰富。体现学校坚持以教学为中心，始终把教育教学质量视为学校的生命线，努力把学生培养成为既具有宽厚的基础理论和娴熟的基本技能，又文理兼容、百科兼纳，专业领域有所建树，德智体美劳全面发展的创新型人才。 “明理”即明情理、明哲理、明法理、明道理。体现教师在为人处事上鲜明的是非原则，在学术科研上诚实守信的良好品德，在学校发展建设上可贵的大局意识，在教书育人上诲人不倦的奉献精神；体现师生能够明辨是非，通情达理。 “砺志”即磨练意志，追求远大志向和美好理想。既体现学校重视学生综合能力的培养，激励学生树立远大理想，也体现学校师生员工同心同德、意志坚定、奋发向上、开拓进取的精神风貌。 “笃行”即坚定地付诸行动，使目标得以实现。既反映了学校着重培养学生的实际行动能力，也体现学校广大师生员工求真务实、脚踏实地，把自己远大的理想、志向变成坚定实际行动的决心。
417	Xiamen University of Technology	明理精工，与时偕行 Progressive Wisdom，Professional Excellence	MOR1; PROF; ACT	“明理”:《宋书·良吏传》：“精练明理，为一世所推”，即明察事理、明了道理。 “精工”:《后汉书·蔡伦》“莫不精工坚密，为后世法”，即精致工巧。 “与时偕行”:《周易》：“终日乾乾，与时偕行”。即“变通趋时”，寓有与“时”相配合而行动的积极意义。 “明理精工”强调做人做事的道德要求和行为规范； “与时偕行”强调紧跟时代步伐、融入社会、服务社会。
418	Sanming University	明德、明理、明志	MOR0; SCH; WILL	“明德”即“明德致善”。语出《大学》：“大学之道，在明明德，在亲民，在止于至善。”要求崇德修身、锤炼品格、积极进取、臻善臻美。 “明理”即“明理致用”。意出《朱子语类》：“读书穷理，当体之于身。”要求明察事理、明了道理、躬行实践、学以致用。 “明志”即“明志致远”。语出诸葛亮《诫子书》：“非淡泊无以明志，非宁静无以致远。”要求志存高远、敢于创新、勇于担当、有所作为。 明德、明理、明志，既是三明学院师生坦荡做人、乐学勤业、成长成才的行事准则，又是严谨务实、艰苦卓绝、奉献社会的精神追求。
419	Longyan University	厚于德，敏于学	MOR0; SCH	“厚于德”，语出《周易》：“天行健，君子以自强不息”、“地势坤，君子以厚德载物”。意思是：君子自励犹天之运行不息，学者立志尤须坚忍刚毅；君子接物，度量宽厚，犹大地之博，无所不载。我们以此为校训首句，意在强调必须将德育放在人才培养的首位。 “敏于学”，语出《论语》：“敏而好学，不耻下问”，“敏于事而慎于言”，“君子欲讷于言而敏于行”。“敏”可有敏捷、敏锐之含义，即：行动敏捷地学习新知识、新技能；目光敏锐地遵循和运用规律、追求真理、勇于创新。我们以此为校训第二句，就是要求我们在大学中要刻苦地学习、审慎地思考、精细地辨析、坚定地实践，勤奋聪敏，知行合一。 校训中“厚于德”倡导的是学会做人、品优德高、和谐乐群；“敏于学”倡导的是学会做事、奋发有为、与时俱进。其核心指向是：德才兼备、品学兼优。这既反映大学培养人的本质内涵，又体现素质教育对大学生的根本要求，同时也反映了中华文化价值观和闽西客家民德归…
420	Fujian Business University	明德、诚信、允能、笃行	MOR0; MOR1; PROF; ACT	校训、校歌是学校文化的重要组成部分，是学校办学历史和优良传统的高度浓缩，是体现学校办学特色、凝心聚力的精神旗帜。为进一步加强校园文化建设，更好地发挥校歌、校训的育人功能，提升学校文化品位，促进学校发展和师生成长。经学校研究决定，将在原有两校校训、校歌的基础上组织开展校训、校歌征集活动。具体要求如下： （1）体现学校办学宗旨和广大师生的精神追求，浓缩我校的办学传统、精神风貌和人文底蕴； （2）语言精练、言简意赅、寓意深远，紧跟时代特点，体现时代精神。 （3）可从原两校校训选择，也可进行新的提炼。 ①原福建商业高等专科学校校训 明德 诚信 勤敏 自强 ②原福建对外经济贸易职业技术学院校训 弘毅 诚信 允能 笃行
421	Fujian Police College	忠诚、勤奋、严谨、求实	MOR3; DIL; DIL; ACT	福建警察学院，不断创新思政工作，把忠诚理念纳入日常教育，把忠诚元素注入校园文化建设，把忠诚基因植入实战实践。 在福建警察学院，忠诚教育融入了平常的仪式管理中。学院把仪仗队建设作为警务化管理和忠诚教育的重要抓手，利用升国旗、开学毕业典礼、立功受奖表彰等仪式，强化忠诚意识，规范仪式教育，传递人民警察对党忠诚、服务人民的价值观念和情感。 “忠诚理念纳入日常课程，忠诚元素注入校园文化，忠诚基因植入实践育人”。学院党委书记游晔说，“没有忠诚，一切归零！”所以忠诚教育排在校训之首，忠诚教育成为学院人才培养的重要内容和特色。 正是这种忠诚文化育人的始终坚持和努力，使这里走出去的学生不一样，充满正气、正能量、有成效。学院分别于2016年和2017年被公安部授予集体二等功和一等功。 忠诚教育 存在于文化熏陶和课程中 从忠诚广场到忠诚大道，再到忠诚教育展览馆，漫步福建警察校园，给记者留下最深印象的就是无处不…
422	Putian University	厚德、博学、慎思、笃行	MOR0; SCH; REAS; ACT	厚德：词出自《周易·坤卦》：“地势坤，君子以厚德载物”。词义即推崇、重视美好的道德。“厚德”是中华民族最重要的精神内涵之一，在当代，全校师生自觉遵循社会主义核心价值体系、树立社会主义荣辱观，自觉加强思想品德修养，以德立身，学会做人，追求崇高的理想、高尚的情操、完善的人格。 博学：词出自《论语·子张》：“博学而笃志，切问而近思”。词义即广泛地学习，获取广博的知识。全校师生勤于学习、善于学习，教学相长，促进个人成长、成才，为进行教学实践、社会实践、生产实践夯实知识基础。 慎思：词出自《礼记·中庸》：“慎思之，明辨之”。词义即用心思考，审慎求真。全校师生学会独立思考，善于观察判断，懂得明辨是非，掌握分析问题的方式方法，提高解决实际问题的能力。 笃行：词出自《礼记·中庸》：“博学之，审问之，慎思之，明辨之，笃行之”和《礼记·学记》“博学而不穷，笃行而不倦”。“笃行”是学为成人的最终目的，就是要求…
423	Xiamen Medical College	德厚立人、术湛立业	MOR0; MOR2 ; PROF	校训是学校精神和灵魂的象征，是学校办学理念、人文精神的集中体现，是师生共同遵守的行为规范的高度概括，对学校的校风、校貌建设具有重要意义。厦门医学院校训为“德厚立人，术湛立业”，内涵丰富，意蕴深厚，取意悠远又充盈时代精神，既有丰厚的文化底蕴，又有深刻的现实意义。 “德厚立人”根据《周易•坤卦》“地势坤，君子以厚德载物”句提炼而出，意为广大师生医护人员要有深厚的道德涵养，强调“厚德”是立身的前提和根本。元代医学家王好古在医论著作《此事难知》中说，“盖医之为道，所以续斯人之命，而与天地生生之德不可一朝泯也”。立德树人是高校的立身之本，是中国特色社会主义大学的立校之基，学校办学要以德在先，要发扬人们天赋的善良美德，以达到才德完美无缺的最高境界。才为德之资，德为才之帅，以德为先、德才兼备是社会用人的普遍标准和要求，社会和学校对人才的基本要求首先就是德育和素质方面的，学校人才培养的基本原则就是以人为…
424	Fujian Jiangxia University	博学于文、修身以德	SCH; MOR1	校训取自《论语》中的“君子博学于文，约之以礼”和《大学》中的“修身、齐家、治国、平天下”及“克明德”等古训。
425	Fujian Polytechnic Normal University	明德笃行、弘毅求真	MOR0; ACT; MOR1; SCH	“明德”，语出《礼记·大学》：“大学之道，在明明德。”“明明德”，在于修身，以修身为本，即培养、彰显和践行美好的品德，体现了学校立德树人的根本任务，以立德为立校之本，把德育放在首位，培养高尚的道德情操。 “笃行”，语出《礼记·儒行》：“儒有博学而不穷，笃行而不倦。”朱熹《诸子语类》说：“知之愈明，则行之愈笃；行之愈笃，则知之愈明。” 知行相须，不可偏废；相辅相成，相得益彰。大学教育，应该知行合一，重视实践创新，体现了学校应用型人才培养的办学定位和办学理念。 “弘毅”，语出《论语·泰伯》：“士不可不弘毅，任重而道远。”要有远大的志向，坚定的意志，坚韧不拔的精神，才能实现崇高的理想，体现了学校以天下为己任的担当精神和坚持拼搏奋斗的精神。 “求真”，语出（清）李清馥《闽中理学渊源考》：“求真于未始有伪之先，而性之真可见矣。” 即崇尚科学,追求真知。我国著名教育家陶行知先生，曾以“千教万教教人求…
426	Nanchang University	格物致新、厚德泽人	SCH; INNO; MOR0; MOR2	“格物”取自《礼记·大学》：“致知在格物，格物而后知至，知至而后意诚，意诚而后心正，心正而后身修”。“致新”，则有“作新民”和“创新”双重意思。“格物致新”意在告知师生要追求真理、人文日新。 “厚德”语出《易经》：“地势坤，君子以厚德载物”。 指人要像大地那样有包容、宽忍的大境界。“厚德泽人”就是说我们自己的一切能力不仅是为自身的发展，更为服务于整个人类社会的进步与幸福。
427	East China jiaoTong University	日新其德、止于至善	MOR0; MOR1	在华东交通大学初建的十多年中，看得见的硬件建设是不言而喻的主旋律，到了上世纪八十年代初，学校初具规模，看不见的软件建设，尤其是文化建设，自然而然地被摆上重要日程。 1984年的学校党委工作要点第一次提出了“团结、严谨、求实、勤奋”的“八字校风”，随后在1986年出台的第一个远景规划，即“七·五规划”中明确提出：“把实现八字校风作为不懈努力的方向”。严格来说，这只是一个未来的愿景，还没有形成当时的风气，用“不懈努力的方向”来表述这一愿景非常准确，但是说这就是“校风”不大妥当，此时的校风更多的是校训的内含和作用。1997年天佑桥头镶嵌“团结、严谨、求实、勤奋”八个金字的“校风牌”建成，大家习惯上都称之为“校训牌”。 校训、校风是两个不同的概念。校训重在未来的理想，校风重在当下的风气；校训超越现实，校风反映现实；校训如长空不可执捉，校风如大地可感可知；校训重在引领，校风重在熏陶；校训属于顶层设…
428	East China University of Technology	崇德博学，砺志尚实	MOR0; SCH; WILL; ACT	崇德。“崇”是推崇提倡的意思，“德”指道德、德行。“崇德”指崇尚有德之人、推崇高尚的德行。“崇德”既是为人之本，也是中国历代知识分子的精神追求所在。语出老子《道德经》“修之于身，其德乃真”、《尚书・周书・武成》“惇信明义，崇德报功，垂拱而天下治”；又见《礼记・王制》：“上贤以崇德”。 博学。“博学”指广义的学习。语出《论语・子张》“博学而笃志，切问而近思”、《论语・雍也》“君子博学于文，约之以礼”、《礼记・中庸》“博学之，审问之，慎思之，明辨之，笃行之”；又见《荀子・劝学》“君子博学而日参省乎已，则知明而行无过矣。” 砺志。“砺”，是指“磨冶”、“磨炼”之意。“砺志”指在艰苦的环境中磨炼意志，成就事业。语出《尚书・费誓》“备乃弓矢，锻乃戈矛，砺乃锋刃，无敢不善。” 尚实。“尚实”，指脚踏实地、朴实无华的作风。语出三国时期曹丕《典论・论文》“奏议宜雅，书论宜理，铭诔尚实，诗赋欲丽。” 校训…
429	Nanchang Hangkong University	日新自强、知行合一	INNO; WILL; ACT	“日新”之义最早出自《尚书》，《易经》亦云“日新之谓盛德，生生之谓易”，后来《大学》引用《尚书》之意明确指出：“苟日新，日日新，又日新。” 天地之大德曰生，人生之大德曰创。意即人道要跟着天道变，不断追求，逐渐接近事物的内在规律。学校亦然，必须吐故纳新，与时俱进，勇于探索，止于至善。“日新”即是要求受教育者有强烈之进取精神。近代教育家张伯苓先生一直主张办教育要遵循“日新月异”的精神，并解释道：“所谓的日新月异，不但每个人要接受新事物，而且还要能成为新事物的创始者；不但能赶上新时代，而且还要能走在时代的前列。” 用今天的话来解释，就是受教育者的时代使命，是不断改革、不断前进、永攀高峰，面向祖国、面向世界、面向未来，奋勇走在世界发展大潮的前沿，为建设繁荣富强的伟大祖国而奋进。 “自强”一词出自《易经》，《易经》云：“天行健，君子以自强不息 ”、“地势坤，君子以厚德载物”。因此，“自强”既饱含内…
430	JiangXi University of Science and Technology	志存高远、责任为先	WILL; MOR2	“志存高远”出自诸葛亮《勉侄书》中“夫志当存高远”之句，意寓江西理工学子追求远大的理想、事业的抱负和卓越的精神；“责任为先”出自范仲淹《岳阳楼记》中“先天下之忧而忧，后天下之乐而乐”之句，意寓江西理工学子时刻明白肩负的责任并勇于承担。 “志存高远、责任为先”八字校训，既反映了学校的优良传统与特色，又体现了学校办学的理想追求和实现途径，是对江西理工大学60年历史中凝练出的办学理念和办学精神的高度概括。
431	Jingdezhen Ceramic University	诚朴恕毅	MOR1; MOR1; MOR2; DIL	校训 “诚朴恕毅”如何解读？ 我校先辈们很多有留学背景，又有扎实的国学功底，校训这四个字必有典籍依据。据我们查寻认为，“诚”，出自 《易·乾》：“修辞其诚，所以居业也”；《礼乐记》：“著诚去伪，礼之经也”。意为真诚、真实。“朴”出自屈原 《九章》（怀沙）：“朴为积兮，莫知余之所有”。注“修直为材，壮大为朴”；《史记》（屈原传）：朴作樸，引申为大。意为质朴，成大材。“恕”，出自《论语》：“其恕乎，己所不欲，勿施于人”；朱熹 《集注》：“尽己之谓忠，推己之谓恕”。意为宽容，推己及人。“毅”，出自《论语》：“士不可以不弘毅，任重而道远”；《左传》：“杀敌为果，致果为毅”。意为要成就一番事业，必须坚毅果敢。 “诚朴恕毅”校训旨在培养学生真实无妄，表里如一的品质，吃苦耐劳，胸怀坦荡，推己及人的品格，成就大业的志向和干预干戈创新的精神，以及百折不挠的意志。校训与“养成明白学理。精进技术之人才，以改革…
432	Jiangxi Agricultural University	团结、勤奋、求实、创新	MOR2; DIL; ACT; INNO	江西卫视新闻夜航专题报道我校等几所特色高校的校训文化，我校党委书记曹国庆从学校百年办学历史的发展，深入阐述了我校“团结、勤奋、求实、创新”校训文化的深刻内涵。 我校肇始于1905年创办的江西农业高等学堂，本科教育始于1940年的国立中正大学，跨越两个世纪，历经几代人的艰苦奋斗、求实创新、砥砺奋行，形成了具有我校特色的“团结、勤奋、求实、创新”的校训文化和“厚德博学、抱朴守真”的大学精神。（宣传部）
433	Jiangxi University of Chinese Medicine	惟学、惟人、求强、求精	SCH; MOR3; WILL; DIL	“惟”《说文》中云：“惟，凡思也。”这里引申为“注重、崇尚、推崇、依靠”之义，表示经过慎思熟虑之后的一种追求，一种价值观。同时“惟”作为副词时还可以用来限定范围，表示“只有、只是”，如《书·舜典》：“惟明克允。”又如唐代的刘禹锡在著名的《陋室铭》中说：“斯是陋室，惟吾德馨。”这就表明江中人把“惟学、惟人”的大学精神作为自己最高的价值追求。 “学”的基本涵义一是指学习的过程和方法，即效法，钻研知识，获得知识，培养能力的过程。二是指学习的主体，即学生；三是指学习的环境，即传授知识的地方。四是指学习的内容和目标，即需要掌握的知识、学问、学业。五是指教师的教。 “惟学”作为校训，某种程度它是规范全校学生和教职工行为的准则，要求全体师生员工都要不断学习、不断进取、不断创新，学会做事，学会做人。惟学就要乐学、善学、勤学、乐思、善思、勤思医学教|育网搜集整理。惟学首先是乐学、善学、勤学。“惟学”既体现…
434	Gannan Medical University	立德立行，求是求新	MOR0; ACT; SCH; INNO	“立德立行，求是求新”作为该校校训，言简意丰，内涵深刻，十分贴切地表达了该校的办学理念、治校方略，与学校发展所积淀的文化底蕴、人文精神一脉相承，体现了该校特有的精神与文化。 校训共两句八个字，既相互独立，又相互承接，联为一体，构成了三层逻辑递进关系。一是表达出赣医人坚持内在品德与外在言行培养并重，以“培植善念，付诸善行”为已任。二是彰显出赣医人以脚踏实地、不懈追求的治学态度，涉猎新知，追求卓越。三是喻示着赣医人秉承往圣，开启来贤，推陈出新，志存高远的企盼与追求医学教|育网搜集整理。这三层意思集中体现了赣医精神的内核。 校训在句式上很有特点，“立”、“求”二字对仗工整，富有新意；四个词全部源自典籍，颇有古韵，是该校办学历史、办学传统和校园文化的凝练；同时，又贴近现实，历久弥新，昭示该校科学发展、与时俱进、开拓求新的精神风貌，为一代又一代赣医人预留出了广阔的诠释、演绎和想象的空间。
435	Jiangxi Normal University	静思笃行、持中秉正	REAS; ACT; MOR1	学校先后七次迁址，六易其名，四度调整，砥砺出“静思笃行、持中秉正”的校训，孕育了“团结、勤奋、求实、创新”的优良校风，形成了“以人为本、面向社会”的办学思想，“以生为本、以德为先”的育人思想，“百折不挠、艰苦创业”的办学传统，“质量立校、学术铸校、人才强校、特色名校、管理兴校、和谐荣校”的重点任务和“爱国荣校、民主和谐、求真务实、开放创新”的师大精神。
436	Shangrao Normal University	学高为师、身正为范	SCH; MOR1	上饶师范学院前身是1958年创办的上饶师范专科学校，2000年升格为上饶师范学院。65年来，一代代师院人全面贯彻党的教育方针，秉持“学高为师 身正为范”的校训，栉风沐雨、接续奋斗，形成鲜明的师范性、地域性、多科性办学特色，为国家社会培养了11万余名毕业生，谱写了学校发展蜕变的精彩华章。奋进新时代，学校坚持以习近平新时代中国特色社会主义思想为指导，坚持立德树人初心，践行“五育”并举使命，秉承“政治建校、质量强校、特色立校、廉洁办校”办学治校理念，以教师教育和应用技术型人才培养为主旨，以“双一流”建设为驱动，以服务地方经济社会发展为己任，不断推进学科专业发展，创造条件发展研究生教育，着力打造师范特色鲜明、应用转型发展的国内知名、全省一流的高等师范院校，为中国式现代化建设贡献饶师力量。
437	Yichun University	厚德、尚能、博学、笃行	MOR0; PROF; SCH; ACT	无释义
438	Gannan Normal University	无	/	学校始终秉持“扎根红土、潜心育人”的办学传统，秉承“崇德、尚学、求实、创新”的校风，培育形成了以“多谋思变、同心创业、自强不息、艰苦奋斗、勇于开拓、追求卓越”为基本内涵的赣师人特有的“精气神”文化。2017年11月，学校作为全省唯一高校被中央精神文明建设指导委员会授予首届“全国文明校园”。学校大力弘扬伟大的苏区精神、长征精神，推进红色基因传承，获批全国首批红色文化弘扬基地、全省首届红色基因传承示范校，红色文化育人工作成为学校鲜明的办学特色。
439	Jinggangshan University	广学坚守，勤思敏行	SCH; MOR1; REAS; ACT	广学坚守：语出欧阳修《送曾巩秀才序》：“广其学而坚其守。”“广学”，即广泛学习、学问广博，旨在倡导师生博览群书、博采众长，以臻于博学多才。“坚守”，即坚定理想信念、坚持道德操守，旨在勉励师生以德立身、善养正气，以臻于人格完善，达到“自强不息、厚德载物”。“广学坚守”是中华传统文化的基本精神，既要求师生品学兼优、德才兼备，做到广学明智、立德修身、完善自我、立人达人，又兼具崇高的理想信念，坚定的意志，坚贞的操守，成为一个品德高尚的人。 勤思敏行：“勤思”，语出《孔丛子·居卫》：“禹、汤、文、武及周公，勤思劳体。”“敏行”，语出《论语·里仁》：“讷于言而敏于行。”《论语·为政》：“学而不思则罔，思而不学则殆。”“勤思敏行”指既要勤于思考、审虑周密、探求真谛、把握规律，又要行动敏捷、善抓机遇、勇于实践、敢于创新，是孔子“学思结合”教育理念和江右王学“知行合一”教育思想核心精髓。 “广学坚守，勤思…
440	Jiangxi University of Finance and Economics	信敏廉毅	MOR2; DIL; MOR1; DIL	“信敏廉毅”校训为时任江西省立商业学校（江西财经大学前身）的第二任校长罗静远（字九经）先生于1927年首次提出。“信、敏、廉、毅”四字典出《论语》。“信、敏、廉、毅”既蕴含了优秀的传统文化精神，又涵盖了当今人才培养的基本要求，体现出学校独具的办学特色。 “信”，诚实，不欺也。“敬事而信”，“言而有信”。人无信而不立。古云：“一信字是立身之本，所以人不可无也”。作为财经类高校，意在告诫江财人要以“诚信为本”，做到“诚实守信”，具有崇高的信念和良好的职业道德。 “敏”，勤勉也。“敏而好学，不耻下问”。勤勉也，指勉力以求学。意在倡导江财人以“敏学为基”，养成良好学习习惯，掌握好的学习方法，提升知识，服务社会。 “廉”，廉正，廉洁，清白高洁不苟取也。意在教诲江财人要以“廉洁为镜，廉而知耻”，不断增强自律意识，努力完善人格修养，廉洁奉公，廉而不刿，敢于同各类不良行为作斗争。 “毅”，坚强，果敢，坚…
441	Jingdezhen University	自强不息、泽土惠民	WILL; MOR3	学校坚持文化铸校，不断彰显文化育人功能。用党的创新理论铸魂育人，推动党史学习教育常态化长效化，组建60多支“红色走读”队伍开展实地寻访革命足迹活动，积极响应习近平总书记“建好景德镇国家陶瓷文化传承创新试验区，打造对外文化交流新平台”号召，举办两届“传承与创新——学校的使命与担当中国陶瓷艺术教育”国际论坛、“走进非洲—景德镇学院陶瓷艺术作品展”等大型文化交流和学术研讨活动，扎实开展“陶瓷文化：保护与创新”联合国教席建设，大力弘扬中华优秀传统文化。大力实施“一院一品”校园文化和党建品牌提升工程，不断增强全体师生的爱校荣校意识，文化育人功能不断凸显。
442	Pingxiang University	厚德至善、励学笃行	MOR0; MOR1; SCH; ACT	升本以来，学校秉承“厚德至善、励学笃行”的校训精神，坚持立足萍乡、面向江西、辐射全国、文理为基础，多学科相互支撑、协调发展，重点发展材料、机械和教育类专业，致力于培养适应地方经济社会发展需要的应用型人才。牢固树立地方性、应用型办学定位，不断深化教育教学改革，努力构建符合高等教育发展规律、适应地方经济社会发展需求的人才培养体系，发展态势良好，办学水平和社会声誉提升迅速，本科办学初见成效。
443	Jiangxi Science and Technology Normal University	明德精业	MOR0; PROF	学校自觉履行“为党育人、为国育才”的职责和使命，秉承“学高为师，德高为范”的教师教育传统，恪守“明德精业”的校训，弘扬“团结进取 自强自新”的校风，树立“厚德博学 教书育人”的教风，践行“立志高远 勤学创新”的学风，坚持以红色文化赋能职业教育为特色,以“科技+”“师范+”为特色，以应用型人才培养体系创新为特色，攻坚克难，改革创新，为建成全国一流职业技术师范大学而努力奋斗。
444	Nanchang Institute of Technology	自强不息、格物致知	WILL; SCH	自强不息 语出《周易·乾》：“天行健，君子以自强不息”。意谓：天（即自然）的运动刚强劲健，相应于此，君子应刚毅坚卓，发愤图强。“自强不息”体现了几代南工人为学校从无到有、从小到大、从专科到本科的发展而艰苦奋斗的精神和坚强的意志。 格物致知 语出《礼记·大学》：“欲诚其意者，先致其知，致知在格物”。郑玄注：“格，来也；物犹事也。其知於善深，则来善物；其知於恶深，则来恶物；言事缘人所好来也，此致或为至。” “格物致知”：《现代汉语词典》解释为：穷究事物的原理法则而总结为理性知识，格物致知是儒家的一个十分重要的哲学概念。北宋朱熹认为：“致知在格物者，言欲尽吾之知，在即物而穷其理也。”这是朱子对“格物致知”的最概括、精确的表述。推极吾之知识，欲其所知无不尽也。穷至事物之理，欲其极处无不到也。对于朱熹的解释，我们的理解是，格物就是即物穷理，凡事都要弄个明白，探个究竟；致知，即做个真正的明白人，为人…
445	Jiangxi Police College	忠诚奉献、知行合一	MOR3; MOR3; ACT	无释义
446	Xinyu University	求新、求实、求善	INNO; ACT; MOR1	站在新的起点上，学校不忘立德树人初心，牢记为党育人为国育才使命，秉承“求新、求实、求善”的校训，大力弘扬“解放思想、敢想敢干、抢抓机遇、真抓实干”的光荣传统，努力践行“育人为本、德育为先、能力为重、全面发展”的办学理念，坚定不移地走内涵式发展道路，全面打赢七大攻坚战，突围抢位新征程，固本兴新再出发，奋力谱写建设特色鲜明的高水平应用型本科院校新篇章，为打造新型工业强市、推进中国式现代化江西实践贡献力量。
447	Jiujiang University	竞知向学、厚德笃行	SCH; SCH; MOR0; ACT	校训征集：校训、校风、校徽、校歌是校园文化的重要组成部分，是大学精神的有机载体。为集中展现我校的办学特色、办学经验和办学成果，进一步树立学校的品牌形象，提升学校的品牌价值，建设高品味的校园文化，增强师生的凝聚力和归属感，激发广大师生员工团结奋进的责任感和使命感，深入挖掘、提炼学院的内在精神和办学理念，进一步塑造学院精神，经校党委研究，决定在全校开展校训、校风、校徽、校歌征集活动（详情请见校园网院办通知）。 为认真做好征集工作，6月8日下午，党委副书记熊才水召集宣传部、学生处、团委、工会、文传学院、艺术系等部门和院系领导开会专题部署，提出要求：一是要广泛发动，积极参与。要求全校师生员工以主人翁精神积极参与校园文化建设，充分发挥自己聪明才智，通过集思广益，共同做好这项工作。二是在征集作品中要坚持高标准，严要求，使作品体现时代精神、艺术特色、文化底蕴和九江最高学府的品位。三是在征集校训、校风、…
448	Gandong University	明德致知、笃行惟新	MOR0; SCH; ACT; INNO	该校训以“明德”为体，达“致知”之用；以“笃行”为体，达“惟新”之用。 明德，出自《礼记·大学》，“大学之道，在明明德，在亲民，在止于至善。”以德育人、以德为先、以德为本，才能培育有德之人，这是学校都应该遵守的教育理念，属于德育的范畴。赣东学院校训以明德为首，体现了立德树人的社会主义办学方针和社会主义核心价值观的根本要求，也是希望学院师生加强道德修养，成为正大光明、品德高尚的人。 致知，出自《礼记·大学》，“致知在格物，物格而后知至。”意为探索求知、追寻真理，鼓励学生勤奋学习，教师钻研学问，属于智育的范畴。“致知”也可引申为“致良知”，正是“明德”追求的目标，简单来说就是“知善知恶是良知”，体现了美育的要求，和临川文化也有很深的渊源（临川文化名人、心学开创者陆九渊与理学大师朱熹就此有一场“鹅湖之辩”；王阳明传承、光大“心学”，提出了“致良知”的主张；汤显祖深受心学影响，创作了“临川四梦”…
449	Gannan University of science and technology	无	/	无释义
450	Nanchang Medical College	厚德精业、创新实干	MOR0; PROF; INNO; ACT	新时代赋予新使命，新征程呼唤新担当。南昌医学院坚持以习近平新时代中国特色社会主义思想为指导，坚持社会主义办学方向，全面贯彻党的教育方针，落实“立德树人”根本任务，以“服务国家发展、促进社会进步、勇担健康使命”为办学宗旨，秉持“厚德精业、创新实干”的校训，培养德智体美劳全面发展的社会主义建设者和接班人。“十四五”期间，学校将重点引进一批杰出人才、领军人才、学科带头人；坚持走“中西医并重、医药并举”高质量发展道路；坚持创新发展、内涵发展、协调发展、特色发展，传承“政治坚定、忠诚执着、生命至上、救死扶伤、艰苦奋斗、无私奉献、技术优良、敢于创新”的红医精神，创新人才培养模式，不断提升人才培养质量和办学水平，努力办好人民满意的高等医学教育。
451	Yuzhang Normal University	厚德博学、崇真重行	MOR0; SCH; SCH; ACT	校训是学校人文精神的高度凝练，集中体现学校的办学传统、办学理念和治校精神。《辞海》对之解释为：“学校为训育之便利，选若干德育条目制成匾额，悬见于校中公见之地，是为校训。其目的在于使个人随时注意而实践之。”校训“厚德博学 崇真重行”，是学校倡导全体师生共同遵守的基本行为准则与道德规范。 “厚德”出自《易?坤》：“地势坤，君子以厚德载物。”《淮南子?汜论训》亦谓：“故人有厚德，无间其小节。”“厚德”即增厚美德之意。 “博学”出自《礼记?中庸》：“博学之，审问之，慎思之，明辨之，笃行之。”《礼记?儒行》中也有“儒有博学而不穷，笃行而不倦”之说。“博学”就是广博地学习。 “崇真”之“崇”意为尊崇、推崇、追求，“真”则是指事物的本性、本源和自然界的根本法则，即客观真理。“崇真”，即崇尚、尊崇、追求客观规律和客观真理。 “重行”出自西汉扬雄的《法言?修身》：“何谓四重？曰：重言、重行、重貌、重好。言…
452	Nanchang Normal University	厚德修身、博学育人	MOR0; SCH; SCH; PROF	(一)厚德。语出《周易·坤》: “地势坤，君子以厚德载物。” 释义:大地的气势厚实和顺，君子应增厚美德，容载万物。 (二)博学。语出《礼记·中庸》:“博学之，审问之，慎思之，明辨之，笃行之。”博，大通也，即宽广、广博之谓(《说文》)。 (三)厚德修身。指的是不断培育和养成高尚的品德。学校应以德为先，以德为本，立德树人，培育有德之人;所有师生员工都要修养身性，以德立身、以德立学、以德施教，使自己成为一个品德高尚的人。 (四)博学育人。体现了师范院校的特点，强调的是学识修为的重要性，没有渊博的知识，就无法履行好育人的职责。学校是应用型普通本科师范院校，“育”除养育、培育、教育之意，也指按照一定目的而进行长期教导和训练，因而“博学育人”不仅适用于师范专业，也涵盖其它专业。 这两句话里的第一个字“厚”和“博”， 都反映了积极进取精神。“厚”是厚实厚重，不断积累和培养;“博”是学识渊博，不断学习和…
453	Shandong University	学无止境,气有浩然	SCH; MOR3	“学无止境”可以参考清人方东树《昭昧詹言•通论五古》：“学无止境，道无终极。”此处的“学”，不仅仅是指知识和技能的追求，更包含了道德情操和精神境界的追求。 “气有浩然”出自《孟子•公孙丑》：“我知言，我善养吾浩然之气。”所谓浩然之气，就是大义大德造就的一身正气，体现了孟子所指的“富贵不能淫，贫贱不能移，威武不能屈”的高尚品格。 校训“学无止境，气有浩然”，是以永不满足的执着精神激励广大师生在学术和人生的历程中勇于登攀，不断追求文化知识、技术能力、人文素养和道德情操的完美境界。“学无止境，气有浩然”较之于此前所使用的“气有浩然，学无止境”，更加体现了价值取向，更加符合音韵平仄的要求，更加琅琅上口。
454	Ocean University of China	海纳百川,取则行远	INCL; WILL	“学校为训育之便利，选若干德育条目制成匾额，悬见于校中公见之地”，此乃《中华百科辞典》对校训作注解中的一句。走进中国海洋大学鱼山校区一校门或崂山校区南门，抬头可见各有一块醒目的“校训石”立于“公见之地”，上书八个大字：海纳百川 取则行远。 中国海洋大学这个校训确立的时间是2003年。之前学校的校训是：团结 勤奋 求实 创新，1991年9月15 日出版的《青岛海洋大学报》在报眼位置首次刊出了该校训，“团结 勤奋 求实 创新”符合那个时代的价值取向和精神追求，为学校的校风建设和各项事业的发展起到了积极作用。 进入上世纪90年代中期，特别是1996年入选首批“211工程”建设高校后，海洋大学驶入了一个快速发展时期，各项工作呈现出一种蒸蒸日上的美好景象，国内外交流亦日益频繁。在此背景下，“不少校外人士、校友、客座教授和学校的教师、干部，在不同场合都提到应该重新审视学校的校训”，以便使其更加凸显学…
455	Shandong University of Science and Technology	惟真求新	SCH; INNO	内涵： 格物穷理，求是求真；唯诚唯朴，正己修身。 钻坚研微，革故鼎新；播淳扬善，明德新民。 疏义： 科大校训，是学校的核心办学理念和治学精神，是全体师生共同遵守的基本行为准则与道德规范。 在学校的发展历程中,一直闪耀着惟真求新之光。惟真,就是追求真理,探索真知;真诚做人,认真做事。求新,即不断探求新知识,研发新技术;谋求新发展,开创新业绩;树立时代新风,培养社会主义新人。学校从云程发轫时的中等煤炭职业学校,发展成为一所工科优势突出、行业特色鲜明、多学科相互渗透、协调发展的省属重点大学,在人才培养、科学研究、社会服务、文化传承创新等方面取得的成就,就是对“惟真求新”校训的忠实践行和完美诠。浩渺行无极,扬帆但信风。凡益之道,与时偕行。在新的征程上,全校上下要继续秉承“惟真求新”校训,为学校发展、国家繁荣、民族振兴而不懈努力。
456	China University of Petroleum (East China)	惟真惟实	SCH; ACT	校训是一所学校用简练而概括的文字制定的对全校师生员工具有指导意义的准则，是学校精神的集中体现。校训对全体师生员工具有强烈的导向激励作用、凝聚团结作用和规范约束作用。 石油大学校训表述为“惟真惟实”，具体诠释如下： 一、含义 惟真，是指尊重客观规律，真理至上的意思。它既是一种追求真理的执著信念，又是一种 不唯书、不唯上 ，探求事物规律的科学态度和精神。 惟实，既有求实、求是之意，又指要一切从实际出发，坚持务实、扎实、踏实的作风。同时，也指一个人必须具备诚实、朴实、正直、耿直的良好品质。 我校领导和党委在办学过程中，总结历史经验，提出“以实力求生存，以改革求发展”，正是遵循了“惟真惟实”的方针。同时，这也与目前我校“以学习为中心，走全面发展之路”的意义相同。 二、原因 将“惟真惟实”确立为中国石油大学的校训主要基于以下几点原因。 （一）“求真求实，乃武乃文”体现了一种历史传承关系，折射出石油…
457	Qingdao University of Science and Technology	明德、笃学、弘毅、拓新	MOR0; SCH; MOR1; INNO	我国自古就有“德以修己，教以导人”的优秀传统美德，并有“大学之道，在明明德，在新民，在止于至善”的至理名言，所谓“明明德”，即以德诲人，修德正身之意，此为立身行事之根基。所谓“笃学”，即探求知识，矢志不渝，此为求真务实之基点。曾子曰：“士不可以不弘毅，任重而道远”，所谓“弘毅”即志存高远，坚忍不拔之意，此为探索真理之品质。最后一句是指不断开拓创新，与时俱进，是时代精神的体现，所谓“拓新”即永不满足，勇立潮头之意，此为兴业建功之动力。
458	University of Jinan	弘毅、博学、求真、至善	MOR1; SCH; SCH; MOR1	弘毅：出自《论语》“士不可以不弘毅，任重而道远”一语，意为志存高远，抱负远大，坚韧刚毅。 博学：语出《礼记·中庸》：“博学之，审问之，慎思之，明辨之，笃行之。”又见《论语·子张》：“博学而笃志，切问而近思，仁在其中矣。”“博”有博大，广收，博取之意。博古通今，学贯中西谓之博学。博学既有深层次的学识渊博，又有视野开阔的见闻广博。 求真：出自《闽中理学渊源考》：“求真与未使有伪之先，而性之真可见矣。”意指为博学求知，努力探索规律，追求真理。求真包含“求实”、“求是”之意，在求是中求实，求真，指真理、真情。在自然科学和社会科学中，也包括在为人处事上寻求真理，探索规律。 至善：出自《大学》：“大学之道，在明明德，在亲民，在止于至善。”意指为学 的根本在于修明自身，用自己学问的道和德的成就，投身社会，亲近人民而为之服务，最终达到完美的境界。 “弘毅 博学 求真 至善”意指：拥有远大与开放的思想和胸…
459	Qingdao University of Technology	严谨、勤奋、求实、创新	DIL; DIL; ACT; INNO	八个字既体现了学校风气传承，也浓缩了对教师、学子的殷切期望。 该校训是在1993年40周年校庆时确定。校训就像一面旗帜，带领着一代代理工人团结拼搏，奋发图强，不断取得新突破。 “严谨”：办学要有科学的管理办法，以法治校，就要从严管理；教师教学要有严谨的科学态度，严格要求学生；学生学习要一丝不苟，科学本身就是严谨的。 “勤奋”：“书山有路勤为径”，“业精于勤荒于嬉”，古往今来，大凡有所成就者，都是勤奋者。 “求实”：全校要树立教学中心地位的思想，为教学、为师生多办实事；教学要理论联系实际，科学知识来源于实践，服务于实践，在实践中求发展；学校、教师、学生的发展要从实际出发，实事求是。 “创新”：创新是一个民族进步的灵魂。教育要在科技上创新，在培养人才上创新，培养有创新精神的人才。 校训的酝酿，是在学校恢复本科办学之后的上世纪八十年代。 此前学校经历了办学层次由中专升专科再升本科的上升期，也经…
460	Shandong Jianzhu University	厚德博学、筑基建业	MOR0; SCH; PROF	厚德： 天行健，君子以自强不息，地势坤，君子以厚德载物。—《周易》 博学： 博学而笃志，切问而近思，仁在其中矣。—《论语》 行是知之始,知是行之成。青年一代在广阔的舞台上大有作为，也大有可为。我们要在实践当中不断提升自己的理论素养和实践能力，做到知行合一，更好地筑基建业。 67年来，学校与齐鲁大地的厚重文化同脉，与铿锵前行的共和国脚步同频，始终坚持党的领导，坚持社会主义办学方向，凝练特色、培植优势，践行“厚德博学、筑基建业”的校训，形成了“勤奋、严谨、团结、创新”的校风和“以人为本、自强不息、经世致用、造福桑梓”的办学理念，努力建设成为一所以工为主、以土木建筑学科为特色，工理管文法艺多学科交叉渗透、协调发展的应用研究型大学.
461	Qilu University of Technology	明德励志、崇实尚能	MOR0; WILL; ACT; PROF	本校训是2007年在系统总结60年办学历史和办学特色的基础上凝练而成，校训体现了立德树人、知行合一的理念。 明德：语出《大学》，即认同、践行和彰显美德。励志：意喻着要有远大的理想，并在学习、生活、工作中磨练自己的意志，激励自己实现人生目标。崇实：是指实事求是，追求真理。尚能：“尚”为尊崇、注重，“能”为能力、本领，包括认识能力、学习能力、创新能力、实践能力等。 “明德励志，崇实尚能”的内涵，包括以下几个方面的内容：高尚的道德修养，坚韧的意志品质，远大的理想抱负，严谨的学风作风，求实的科学精神以及过硬的能力本领等。“明德励志，崇实尚能”的校训契合校（院）办学实际和育人特色。
462	Shandong University of Technology	厚德、博学、笃行、至善	MOR0; SCH; ACT; MOR1	①厚德字面上的释义就是，心胸宽广不以个人得失为主，重公轻私，谓之厚德。现在多用来以崇高的道德、博大精深的学识培育学子成才。 ②博学与笃行可放在一起解读，在前面已经说过的山师大校训中也有此两个词。一般指儒家当中增进学业，修养人格的功夫。“博学之，审问之，慎思之，明辨之，笃行之”是出自《礼记·中庸》的古典名言。另外分开来说，两个词语也出自《论语》：“博学而笃志，切问而近思。”“博学”既指广泛学习，也指学问渊博。 ③至善的意思是达到极完美的境界，出自《礼记·大学》，原文提到：“大学之道，在明明德，在亲民，在止于至善。经过明明德和亲民两个阶段，才能达到至善的境界。这样的境界不管是求学还是做人都是非常难以达到的，所以更多的是指对人格和学识的一种追求。 校训四个词语中，“厚德”突出了德育为首的教育理念；“博学”是求学、治学的目标；“笃行”强调的是重视实践、知行合一；“至善”则是人格与学识和谐统一的完…
463	Shandong Agricultural University	登高必自 To climb higher, you must start from the bottom	WILL	“登高必自”典出《中庸》“君子之道，辟如行远必自迩，辟如登高必自卑。”意思是远行一定从近的地方起步，登高一定从低的地方开始。 “登高必自”昭示人们干事创业既要有“登高”的目标，志存高远，敢想敢干，又要从“自卑”处开始，脚踏实地，循序渐进。“登高必自”校训是山农人努力攀登、坚韧不拔的泰山精神，勤劳勇敢、自强不息的中华民族精神和山东人民质朴务实、埋头苦干的实干精神的写照。
464	Qingdao Agricultural University	厚德、博学、笃行、致远	MOR0; SCH; ACT; WILL	厚德：语出《周易》：“君子以厚德载物”，意为道德高尚者会受到人们的拥戴，能承担重大使命。“厚德”指广厚之德，大德。意在倡导师生员工崇尚道德、知荣明耻、存荣弃辱、共创和谐。 博学：语出《论语》：“博学而笃志，切问而近思”，意为广泛地学习，专心致志地探求真理，联系实际进行思考。“博学”意为广泛地学习，也指学问渊博。意在倡导师生员工创新学习、追求真理、博采众长、丰富自我。 笃行：语出《中庸》：“博学之，审问之，慎思之，明辨之，笃行之”。“笃行”是为学的最后阶段，意为既然学有所得，就要努力践履所学，使所学最终有所落实。“笃”有忠贞不渝、踏踏实实、一心一意、坚持不懈的意思。意在倡导师生员工知行统一、注重实践、身体力行、学以致用。 致远：语出《诫子书》：“非淡泊无以明志，非宁静无以致远”。意为：不把眼前的名利看得轻淡就不会有明确的志向，不能平静安详全神贯注地学习，就不能实现远大的目标。“致远”意为远…
465	Shandong Second Medical University/Weifang Medical University	乐道济世	PROF; MOR3	“道”是道理规律之总纳，是价值信念之归结。“乐”是热爱、遵行。“乐道”就是以探究真理为己任，教师乐教、医生乐医、学生乐学，是一种人生价值追求。“济世”就是心怀天下，济助世人，是一种使命责任担当。乐道为本，济世为要。做乐道之人，修济世之为。
466	Shandong First Medical University	跬步千里，止于至善	DIL; MOR1	跬步千里，意思是走一千里路，是半步半步积累起来的。比喻学习应该有恒心，要坚持下去，不要半途而废。出自《荀子·劝学》。 止于至善，意思是处于最完美的境界。出自《礼记·大学》
467	Binzhou medical university	仁心妙术	MOR1; PROF	释义：仁心，其意：仁爱之心、仁慈之心、仁义之心，要具仁者情怀，心系天下；关爱生命，关爱社会，关爱自然；参天地，赞化育，致和谐。妙术，其意：精深学术、精湛技术、精妙创造。要具智者才学，崇尚学术；勤于学习，精于实践，勇于创新；求真理，探新知，济民生。
468	Shandong University of Traditional Chinese Medicine	厚德怀仁、博学笃行	MOR0; MOR1; SCH; ACT	厚德怀仁 博学笃行厚德，犹大德。语出《周易·坤》：“地势坤，君子以厚德载物。”《淮南子·氾论训》亦谓：“故人有厚德，无间其小节。”厚德载物的意思是说，以深厚的德育人利物。 怀仁，其意为心怀仁德。语出汉陆贾《新语·道基》：“圣人怀仁仗义。” 博学，意为广泛的学习。笃行，意为切实履行，专心实行。语出《礼记·中庸》：“博学之，慎思之，明辩之，笃行之。”《礼记·儒行》：“儒有博学而不穷，笃行而不倦。”其中“博学”、“审问”属于学的过程，“慎思、”明辩“是思的过程，”笃行“则是习和行的过程，”博学“意指广泛地学习人文知识及与医学有知的科学文化知识：”笃“意指忠实，专注，一心一意。”笃行“意指对医学事业专心致志，锲而不舍，知难而进，勇往直前，也包含有百折不挠，愈挫愈勇的精神。
469	Jining Medical University	明德、仁爱、博学、至善	MOR0; MOR1; SCH; MOR1	学校根植孔孟之乡，传承儒家思想，办医学圣地教育，育儒风海韵人才。建校以来，始终坚持“为国家育人才，为大众谋健康”办学宗旨，秉承“明德、仁爱、博学、至善”校训，弘扬“求精、求是”校风，形成“诲人不倦”的教风和“学而不厌”的学风，明确“三区一园”办学格局，致力于培养“品德高尚、业务精湛、身心健康”的应用型人才。
470	Shandong Normal University	弘德明志、博学笃行	MOR0; WILL; SCH; ACT	山东师范大学坐落在历史文化名城济南。建校70余年来，学校植根齐鲁文化沃土，汲取泉城人文灵韵，秉承“尊贤尚功、奋发有为”的校园精神和“弘德明志、博学笃行”的校训，自觉传承创新齐鲁文化，努力彰显教师教育特色，目前已发展成为一所学科专业齐全、学位体系完备、师资人才充沛、社会声誉优良的综合性高等师范院校。
471	Qufu Normal University	学而不厌,诲人不倦	SCH; PROF	建校近70年来，学校深汲传统文化底蕴，厚植以文化人情怀，传承“学而不厌、诲人不倦”校训，发扬“勤奋、朴实、团结、进取”校风，发展成为一所基础文理优势突出、多种学科协调发展、弘扬优秀传统文化和培养卓越教师特色突出的省属重点综合性师范大学。 学校开设《君子师者》等讲座，感受君子师者“有教无类”“诲人不倦”的师道精神。曲阜师范大学的校训就是“学而不厌、诲人不倦”。“诲人不倦”是曲阜师范大学教师的自觉，校园内的校训石、师道刻石、师道墙等让学生耳濡目染。同时，每年的研究生新生入学教育，德育必不可少。特别是曲阜师范大学有专门的宣讲师德的讲堂，李兆祥教授主讲的《君子师者》让教育硕士感受君子“得天下英才而育之”的人生快乐；《走近孔子》《孔子与中国师道传统》等知名讲座，让教育硕士体会一个师者“有教无类”、“诲人不倦”伟大师者的使命和担当。
472	Liaocheng University	敬业、博学、求实、创新	PROF; SCH; ACT; INNO	“敬业”：我校师生员工热爱教育事业，有崇高的责任感和强烈的事业心。 “博学”：博学是在治学上对全体师生员工的要求。教职员工在教书育人、管理育人、服务育人中都要具有博深的学识；学生要刻苦钻研，努力学习掌握科学文化知识和技能，形成广博、专深的知识结构和学养。 “求实”：全校师生员工要善于从实际出发，研究探索教与学的规律，脚踏实地的工作和学习，务求实效。 “创新”：只有努力进取、开拓、创新，师生个人才能行远、做出更大贡献，才能将学校建成国内一流的地方综合性大学。
473	Dezhou University	崇德启智、励志博学	MOR0; SCH; WILL; SCH	德州学院以“崇德启智，励志博学”为校训。“崇”为尊重，推重，崇敬，凝聚，增长之义；“德”隐含三种含义：以德治国，操守品行，德州的德。“启”为启迪、开导、启发；“智”为智力，智慧，聪明，智商等多义，对“智”的启迪是大学永恒的主题。“励”为劝说；“志”即志向，意志，志气，志愿，志趣，有高尚，坚忍，向上，节操等义；“励志”符合大学育人境界。“学”更是大学本身之义，“博学”强调学海无涯，学无止境。“崇德启智”的“德”和“智”都切近我国现阶段大学的功能，“崇德启智”是人才培养的最终目标。 校训上句侧重宏观、方向、整体，把握总体教育方针，下句侧重微观、局部、个人，体现了具体的教育内容。八字对称，词汇典雅，意境高远。
474	Shandong University of Aeronautics	明德、砺学、日新、致远	MOR0; SCH; INNO; WILL	“明德”，出自《礼记•大学》：“大学之道，在明明德，在亲民，在止于至善。”“明德”，指使人的美德得以显明。《河南程氏粹语•论道篇》中说：“一德立而百善从之。”“明德”，旨在强调大学教育中道德建设的重要性，寓意学校重视广大师生思想道德的培养，弘扬和光大中华民族的传统美德，引导广大师生员工在遵守基本行为准则的基础上，追求更高的思想道德境界。 “砺”，包含磨砺、磨练之意；“学”包括“学问”和“学习”两个层面。“砺学”意指全体师生要修养学品，探究学问，且躬身履践，日进有功。追求一种超迈、高远、卓越的人生状态。 “日新”，出自《礼记•大学》：“苟日新，日日新，又日新。”“日新”，天天更新，日日进步，弃旧图新。“日新”，是一所大学出人才、出成果、上台阶的重要保证。学校肩负着培养高层次人才的历史使命，应与时俱进，在开拓中求发展，在创新中求突破，努力培养基础实、能力强、素质高、适应快，富有社会责任感和创…
475	Ludong University	厚德、博学、日新、笃行	MOR0; SCH; INNO; ACT	学校始建于1930年，历经山东省立第二乡村师范学校、胶东公学、胶东师范学校、莱阳师范学校、莱阳师范专科学校、烟台师范专科学校、烟台师范学院等历史发展阶段，始终同中华民族争取独立、自由、民主、富强的伟大复兴事业同呼吸、共命运，孕育了“厚德 博学 日新 笃行”的鲁大校训，传承了“求是至善 尚实致用”的鲁大校风，铸塑了“严谨 精益 卓越”的鲁大质量文化，形成了多学科交叉融合服务国家战略需求、引领支撑区域经济社会发展的办学特色。2001年，原山东省交通学校并入。2006年，学校更名为鲁东大学。 “得天下英才而育之”，是历代鲁大人笃定的办学信念。
476	Linyi University	明义、锐思、弘毅、致远	MOR2; REAS; MOR1; WILL	分别取自临沂籍圣贤颜真卿、刘洪、曾子、诸葛亮之语或赞其之语，集书圣王羲之字体而成，简称“五圣校训”。 校训采用与临沂历史文化密切相关的先贤创造的重要理念组合而成，具有鲜明地域特征，富含传统文化积淀，体现了对优秀传统文化和沂蒙精神的传承。校训中的四个理念，涵盖了品德修养、学业追求、意志磨炼和人生理想等，既彼此独立，又浑然一体，富有时代精神。
477	TaiShan University	厚德博学、求实创新	MOR0; SCH; ACT; INNO	"厚德博学"用于校训，突出了德育为先的思想和求学治学的目标，意在期望师生员工以高尚的道德立身，担当天下重任；倡导师生员工努力学习，博采众长，追求广博的学识和渊博的学问。从大学的办学理念看，厚德博学还有德才兼备、德才相济、厚德载物、兼容并包之意，即一所新时代的大学应当具有"泰山不让土壤故能成其大"的博大胸襟与恢宏气度。 "求实创新"用于校训，强调了求真务实的作风和开拓创新的精神，意在期望师生员工以实事求是的科学精神，对待文化科学知识，端正教风、学风和校风，提高实践水平与应用能力，形成良好的大学文化氛围；激励师生员工树立努力攀登、坚韧不拔的创新精神，解放思想，大胆探索，不怕困难，干事创业。从大学的办学功能看，大学是在崇实基础上继承、弘扬创新精神的神圣殿堂，是在尚实基础上孕育创新思想、培养创新人才的摇篮。
478	Jining University	博学笃志、择善敦行	SCH; WILL; MOR1; ACT	“博学笃志”语出《论语·子张》，曰：“博学而笃志，切问而近思，仁在其中矣。”“笃”，忠实、专心；“志”有两种解释：一是“志”同“识”，记忆在心；二是志向。全句的意思是说，广泛地学习而又坚守其志向，就切身有关的问题发问而又从近处去思考，仁就在这中间了。 “择善敦行”：“善”一般理解为“和善”、“善良”，这里应理解为“好”、“优良”等；“敦”有“厚道”和“诚恳”两种意解，在这里应理解为“诚恳”、“忠诚”等等。《论语·述而》曰：“三人行，必有我师焉，择其善者而从之，其不善者而改之。”“择善敦行”由此演化而来，就是要选择好目标或方向，忠实地去实践、去奋斗、去拼搏。 以此作为校训，就是要倡导（训导、教化）全体师生员工努力学习，博览群书，博采众长，牢固树立为祖国、为人民服务的远大志向。作用于教职员工，要让他们有渊博的学问，更好地为教学、为学生服务；作用于学生，要让他们追求广博的知识，树立远大的志向，…
479	Heze University	修德、笃学、求是、创新	MOR0; SCH; SCH; INNO	“修德、笃学、求是、创新”，是指求学治学的第一目的就是明晓道理、修养品行和道德，要求广大师生秉持终身学习理念，严谨治学、勤奋好学，求索真相，追求真理，奋发向上，开拓创新。 “修德”是办学之魂。“修”，原意为“美好”。后来引申为学习、培养。“德”指道德品行，德为人之本。“修德”阐明求学治学的第一目的就是明晓道理、修养品行和道德。人类有三类职业必须以道德为前提的，第一类就是教师，因为教师的一言一行都会触动别人的灵魂，教师的德行会极大地影响学生的德行。第二类是医生，第三类是法官。这三类职业中，人们对教师的道德要求是最高的。当选择大学教师这个职业的时候，实际上等于选择了人类的最高道德。与社会上的其他职业道德不同，师德的第一个层次是对学生的爱，一种无私的爱。这种爱甚至超过母爱，更超过情爱。这个爱最大的特点就是他从来不要求学生对自己有所回报。师德的第二个层次表现为对学术的爱，把学术当作自己的人格来对…
480	Shandong University of Finance and Economics	克明峻德、格物致知	MOR0; SCH	克明峻德：即人要能彰明本身的大德。典故见于《书经·尧典》“克明峻德，以亲九族”。“克明峻德”与《大学》开篇之论“大学之道，在明明德”中的“明明德”，虽语境不同，却是一脉相承，阐明学习的目的首要的是弘扬高尚的道德情操，明晓道理，修养品行，彰显美德，既能照亮自己的人生之旅，又能用此光明帮助别人造福于社会。 格物致知：即考察事物，获取知识。词语引自《大学》“致知在格物”。“格物”即知事物之本末，强调凡事都要弄个清楚，探个究竟；“致知”即穷事务之终始，强调拥有真正的学问，为人行事决不糊涂。“格物致知”是儒家学说的重要哲学概念，是儒学的学理根基，阐明了实践与理论的辩证关系：知识之所以增进，是因为去探究了事物的根本；探究了事物的根本，知识自然就增进。 “克明峻德 格物致知”的整体含义，概言之，就是追求崇高的精神境界，养成高尚的道德品质，树立严谨的治学态度，探求事物发展的本质规律。校训高度展现了立德、…
481	Shandong Sport University	坚卓竞远	DIL; WILL; PROF; WILL	1、 坚卓 ⑴“坚”指立场、信念坚定，态度坚决，基础坚实，学识厚博。本义：泛指坚硬、结实，坚毅；牢固，坚固，强固有力而不易摧毁；坚定，意志、主张不动摇；牢靠，稳定。 ⑵“卓”指才识超越寻常、卓尔不凡、卓然而立、高瞻远瞩，出类拔萃、超群绝伦。 本义：超然独立，高明，高超；高远，遥远；独特。 “坚卓”含义：坚贞无谓、坚持不懈、坚强不屈、坚守不渝、刚毅准确、坚忍不拔，追求卓越。指立场、信念坚定，态度坚决，意志坚强，学业、学术坚实，自强不息，百折不挠，厚德笃学，追求卓越（“坚卓”凝练了我院的办学传统、优良作风、办学目标和发展方向）。 2、竞远 ⑴“竞”指竞技、竟学、竞争、竟胜。竞争的精神与竞技能力。 本义：指比赛，争竞，角逐，互相争胜；终于;到底；强劲。 ⑵“远”指远大、远见、长远、高远；指宏伟的目标，远大的理想，长远的规划与发展。 本义：走路走得长，引申为距离长远；长久，长远；高远；远大，远略…
482	Shandong University Of Arts	闳约深美	SCH; PROF	1918年蔡元培先生书“闳约深美”赠上海美专。时任上海美专校长的刘海粟先生将其作为办学思想的核心，并对“闳约深美”诠释曰：“‘闳’就是知识要广阔；‘约’就是在博采的基础上加以慎重选择，吸收对自己有用的东西，人生有限，知识无穷，不能把摊子铺得太大，以便学有专长；‘深’就是钻研精神，要入虎穴，得虎子，百折不回；‘美’就是最后达到完美之境。” 用此四字作为校训：一是要求为学者要有宽阔的心胸和眼界，要博学多识，有广博的知识、坚定的目标，以崇高的艺术理想、百折不回的求学精神，向着艺术高峰攀登，永不停息地进取。二是要求教职员工承担起艺术教育的历史责任，以中华艺术事业的繁荣、发展为己任，志存高远，心系艺术，生命不息、奋斗不止。
483	Zaozhuang University	兼爱、尚贤、博物、戴行	MOR2; MOR3; SCH; ACT	校训校的改革发展正处于关键时期，为实现学校提出的创建特色鲜明的地方性应用型大学的目标，为学校发展提供强大的精神支撑和合力，通过精神驱动促进事业发展，充分体现枣庄学院的办学理念和人文精神，彰显办学特色，优化校园风气，营造良好的育人环境，传播先进科学文化，提升我校公众形象，增强全校师生的凝聚力、向心力、自信心和自豪感，根据学校的文化积淀和办学实践，将枣庄学院的校训凝练为：兼爱尚贤、博物戴行。 学校的校训用词取自先秦文化典籍《墨子》，《墨子》是阐述墨家学说的著作，墨家思想内涵丰富，具有普世的人文精神和科学精神，影响久远。墨学在战国时期与儒学并行于世，史称“显学”，墨子被誉为“比孔子还高明的圣人”，世称“科圣”，墨子“兼爱、非攻”的思想在现代社会仍有着深刻的现实意义。枣庄是墨子的故里，枣庄学院是国内外最早进行墨学研究的单位之一，墨学研究是枣庄学院特色办学的重要体现。凝练墨子精神，并赋予它新的内涵…
484	Shandong University of Art&Design	天工开物,匠心独运	PROF; PROF	“天工开物”一词取自中国明代科学家宋应星所著的工艺文献《天工开物》，该书是一部综合性的科技著作，记载了明代中期以前大量的工艺技术，被世人称为“中国十七世纪的工艺百科全书”。“天工开物”一词是借用《尚书?皋陶谟》中的“天工人其代之”及《易?系辞》中的“开物成务”联结而成。“天工”即自然规律,“开物”乃“开道释物”。“天工开物”思想强调人与天（自然界）相协调、人工（人力）与天工（自然力）相配合，通过技术从自然界中开发出有用之物。“天工开物”思想的内涵在于，自然界蕴藏着取之不尽用之不竭的美好而有益之物，但不会从天而降、轻易取得，而是“巧生以待”，须借水火等自然力的作用，再以人力和技术通过金属、木石工具从自然界开发出来，为人所用。“天工开物”思想强调人类顺应自然和科学规律，立足民生的工艺造物行为，表达了一种具有普遍意义的工艺思想,是中国工艺造物思想的集中体现,具有丰富的设计文化内涵。 “匠心独运…
485	Qingdao University	明德，博学，守正，出奇	MOR0; SCH; MOR1; INNO	一、校训的简单解读 青岛大学的校训：明德，博学，守正，出奇。 校训可以简单地解读为：培育高尚的品德，积累渊博的学识，恪守正确的规范，诚实做人，扎实做事，解放思想，开拓创新，出奇制胜。 二、校训的字词结构 青岛大学校训包括8个字，4个词。 词性：“明德”、“博学”、“守正”、“出奇”4个词都是动词，其中的“明”、“博”、“守“、“出”也都理解为动词。 音律：第1、2、4个词的词尾读音都是平声，第3个词的词尾读音是仄声，恰好符合中国诗词的格律。 字词辨析：无论是从词义还是从音律来理解，都不能把校训表达为“明德博学，守正出奇”两个短语。 三、校训的历史传承 青岛大学的校训与不同历史时期的办学理念有不解之缘。 青岛大学的办学历史是一个多源汇聚的历史。 学校最早的历史源头是青岛特别高等专门学堂，创建于1909年。青岛特别高等专门学堂奉行“崇尚科学，因需施教，实践第一，学研相长”，开辟了划时代的高等…
486	Yantai University	守信、求实、好学、力行	MOR1; ACT; SCH; ACT	重诚信是中华文化的精髓，也是为人立身之本；求真务实是我党的光荣传统，也是事业成功的保证。该校训强调崇尚诚信，注重实效，追求真理，开拓创新，以好学的精神求智，以力行的精神履践仁道。子曰：＂好学近乎知，力行近乎仁，知耻近乎勇。＂将此作为修身的根本，持志力行，勤勉进取，以求达到智者不惑、仁者不忧、勇者不惧、诚信求实畅行天下的理想人生境界。烟大师生以此为校训，循此方向奋斗，自强不息，假以时日，十年树木，百年树人，今后必能桃李芬芳，为社会培育出无数栋梁美材。
487	Weifang University	厚德、博学、求是、创新	MOR0; SCH; SCH; INNO	“厚德”———语出《易·坤卦》:“地势坤，君子以厚德载物。”“厚德”二字彰显了潍院师生以博大宽容的道德立身，不忘初心，永担重任。“博学”———语出《论语·子张》:“博学而笃志，切问而近思。”潍院师生将在此教导下努力学习，博采众长。“求是”———语出《汉书》:“修学好古，实事求是”即要求潍院师生博学求知、求真、求是。“创新”———语出《魏书》:“革弊创新者，先皇之志也”在此引导下，潍院师生将与时俱进、开拓进取、大胆创新。从1951到2018半个多世纪以来，潍院人在此八字校训的教化下艰苦奋斗、开拓创新、求真务实、勠力同心、励精图治，增强了学校的凝聚力与向心力。十年树木百年树人，潍院的未来也将更上一层楼！
488	Shandong Police College	忠诚、严谨、团结、奉献	MOR3; DIL; MOR2; MOR3	山东警察学院是山东省公安机关的重要组成部分，是中国共产党领导下创建的第一所警察学校，有着光辉的革命历史和优良的革命传统。学院坚持政治建警、政治建校，从严治警、从严治校，严谨治学、求真务实，形成了“忠诚、严谨、团结、奉献”的警院校训，营造了求真务实、勇创一流的优良校风，为青年学生获取知识、锤炼作风、提升能力、健康成长提供了重要平台和有力支撑。
489	Shandong Jiaotong University	明德至善、格物致知	MOR0; MOR1; SCH	校训，最能反映一所大学的传统和特色，因为校训是学校制定的对全校师生具有指导意义的行为准则，是对学校办学传统与办学目标的高度概括。校训对激励全校师生弘扬传统，增强荣誉感、责任感，继续奋发向上，具有特别重要的意义。 “明德至善 格物致知”选自中国古代著名经典《大学》，其原文为：“大学之道，在明明德，在亲民，在止于至善。古之于欲明明德于天下者，先治其国。欲治其国者，先齐其家。欲齐其家者，先修其身。欲修其身者，先正其心。欲正其心者，先诚其意。欲诚其意者，先致其知。致知在格物。格物而后知致，知致而后意诚，意诚而后心正，心正而后身修，身修而后家齐，家齐而后国治，国治而后天下平。” 明德：注重道德修养，使道德法令化为内在需求，达到人生道德境界。明德为做人第一要务，为教育首要职责。 至善：明辨是非、善恶，除不善之行与思，臻于尽善的生存状态，实现自我超越。张扬个性，发挥所善之特长， 造就个性化人才。 格物…
490	Shandong Technology and Business University	惟平惟准、近知近仁	MOR3; SCH; MOR1	“惟平惟准”取自《史记•卷三十•平准书第八》“……故抑天下物，名曰‘平准’”。惟，一心一意，全心全意；平，公平、公正，“允执其中”不过又不不及；准，准的，目标、目的、标志物。平准：古代对“经济”这一概念的表述。 “近知近仁”则取自《中庸》“子曰：好学近乎知，力行近乎仁”。近，接近；知，智也，知识、智慧、智能；仁，仁德、仁爱。即刻苦学习（好学），增长才智（近知），努力实践（力行），涵养仁善（近仁）。 惟平惟准，近知近仁，即修身力求平衡全面，立志务须明确高远，以超凡智慧和高尚品德，努力做到公平公正、允执其中，实现社会经济发展的顺畅圆满。
491	Shandong Women’s University	坤德含弘,至善尚美	MOR0; MOR1; WILL	坤德含弘，出自《易经》“坤厚载物，德合无疆，含弘光大，品物咸亨”。坤德，女性如大地之博、承载万物，崇尚美德、宽厚谦和。含弘，无所不有的包容和仁爱精神。至善，出自《大学》“大学之道，在明明德，在亲民，在止于至善”,指追求达到道德的最高境界。尚美，崇尚秀外慧中之美，营造洋溢道德美、人文美的女院文化。八字校训含义深远、意蕴无穷，体现女院人所崇尚的美好的道德情操，博大的襟怀气魄，宏伟的境界追求，丰厚的文化底蕴。
492	Shandong Institute of Petroleum and Chemical Technology	无	/	追溯学院历史，学院前身为胜利油田师范专科学校。2003年3月，经教育部批准，中国石油大学（华东）和胜利石油管理局在胜利油田师范专科学校基础上，合作举办石油大学胜利学院。2005年3月，学院更名为中国石油大学胜利学院。2021年1月，经教育部同意，学院转设为省属公办普通本科高校——山东石油化工学院。2022年2月18日学院正式揭牌，开启了跨越发展新征程。
493	Shandong University of Political Science and Law	博学笃行、刚健中正	SCH; ACT; WILL; MOR1	“博学笃行 刚健中正”的校训秉持中华优秀传统文化，承续时代精神与民族精神,其来有自。《礼记•中庸》：“博学之，审问之，慎思之，明辨之，笃行之。”《易•乾》：“大哉乾乎！刚健中正，纯粹精也。”《彖辞》：“刚健笃实，辉光日新。其德刚上而尚贤，能止健，大正也。”山东政法学院校训体现了为学做事做人的基本规范与原则。兼容开放胸襟、广博潜心求知、学以致用知行、至善大美追求、积极入世责任、自强不息奋斗、公平正义价值、至真至诚人格，积极回应“培养什么人、怎样培养人、为谁培养人”这一根本问题。子曰：“吾道一以贯之”, 君子之道，辟如行远，必自迩；辟如登高，必自卑。人间正道，青春飞扬，弘扬校训精神，做新时代的追梦人和建设者。
494	Qilu Normal University	博学明道，崇德象贤	SCH; MOR1; MOR0; MOR1	“博学明道”出自《晋书•儒林传》：“博学足以明道，前虽不至，其更以博士征之。”“崇德象贤” 出自《尚书•微子之命》：“殷王元子，惟稽古崇德象贤。” “博学明道 崇德象贤”作为校训，就是引导师生员工要广泛学习各方面的科学文化知识，追求真知，探索真理，做学识渊博的人；要传承中华优秀传统文化，见贤思齐，提高修养，做品德高尚的人。 它体现了学校 “育人为本、德育为先” 的教育理念，突显了学校致力于为国家培养德才兼备人才的办学宗旨。
495	Shandong Youth University Of Political Science	德才兼备、自强不息	MOR0; SCH; WILL	德才兼备：“见贤思齐焉，见不贤而内自省也。”（《论语·里仁》）贤为德才兼备之意。胡锦涛同志在全国组织工作会议上明确提出，今后用人的标准要坚持德才兼备、以德为先。坚持德才兼备的育人目标和用人标准，是政治院校特有精神的集中表现，也是全校师生应当恪守的行为准则。 自强不息：“天行健，君子以自强不息。”（《周易·乾》）意思是：天（即自然）的运动刚强劲健，相应于此，君子处世，应像天一样，自我力求进步，刚毅坚卓，发愤图强，永不停息。自强：自己努力向上；息：停止。就是要求广大师生要自觉地努力向上，永不松懈。
496	Shandong Management University	明德弘毅、博学笃行	MOR0; MOR1; SCH; ACT	“明德弘毅”的字义：明德出自《大学》，原文是：“大学之道，在明明德，在亲民，在止于至善”。明德：“明”，一为明白、清楚，二为懂得、了解，三为弘扬、彰显；“德”，指品行、品质、道德。弘毅：出自《论语 泰伯》，原文是：“曾子曰：士不可以不弘毅，任重而道远。”曾子是孔门弟子曾参。根据南宋朱熹的解释：弘，宽广也，毅，坚忍也，非弘不能胜其重，非毅不能致其远。这意味着一种以宽广的胸怀和眼界、以坚忍的意志和毅力，去面对人生的态度，只有这样，才有可能实现远大的理想和抱负。同时，还意味着知识分子对于社会的责任感、以天下为己任的自信心。 “博学笃行”的字义：出自《礼记 中庸》十九章，原文是：“博学之，审问之，慎思之，明辨之，笃行之。”“博学之”的意思是，学习首先要广泛的猎取，培养充沛旺盛的好奇心。“博”还意味着博大和宽容。“笃行之”是说既然学有所得，就要努力践行，使所学最终有所落实，做到“知行合一”。“笃”…
497	Shandong Agriculture And Engineering University	厚德、自强、求是、笃行	MOR0; WILL; SCH; ACT	多年的办学积淀，铸就了学校艰苦奋斗的优良传统和奋发向上的进取精神，形成了“厚德、自强、求是、笃行”的校训，“勤勉、实干、精业、励新”的校风和“以学生为中心、以育人为根本、以服务求发展、以特色强内涵”的办学理念。学校坚持党的全面领导，贯彻党的教育方针，紧紧围绕立德树人根本任务，不断更新教育观念、深化综合改革，致力于培养专业基础扎实，实践能力较强，适应能力良好，具有家国情怀和创新精神，德智体美劳全面发展的知农爱农高素质应用型人才。
498	North China University of Water Resources and Electric Power	勤奋、严谨、求实、创新	DIL; DIL; ACT; INNO	江河作歌，水电筑梦。学校将坚持以习近平新时代中国特色社会主义思想为指导，以为党育人、为国育才为使命，以江河安澜、水润民生为担当，恪守“勤奋、严谨、求实、创新”校训，实施“质量立校、人才强校、特色兴校、开放活校”发展战略，奋力迈入跨越式转型发展新阶段，朝着“双一流”大学创建目标砥砺前行，努力为教育强国建设、新时代水利事业和河南经济社会高质量发展贡献华水力量！
499	Zhengzhou University	求是、担当	SCH; MOR3	求是担当就是指要真抓实干，勇于担当，敢于实干。“求是”在这里，既指探究自然、社会和人本身运动（活动）的奥秘、规律，更指追求真理的科学态度、科学精神。担当就是责任，就是勇气，就是奉献。往大里说，是一种责任感、使命感;往小里说，是不怕困难，能担事。 求是担当的基本内涵即是“追求真理，知识创新，服务社会，履职尽责”。这是郑州大学办学理念的核心体现与集中概括，体现大学的内在品格与办学特质，也是大学精神的历史积淀与价值追求。从办学来讲，这是郑大人共同铸就的大学文化；从育人来讲，这彰显了郑大人的精神品格。 原校训取自于第一任校长嵇文甫先生作的《河南精神》一文中，含校训的部分见下面： 窃尝闻之曰，“河南文不如南，武不如北”。此言似矣，而未尽然也。盖河南之传统精神，以“平正通达”为其特征者也。夫“平正通达”则近乎“中”。惟其“中”也，故当其盛时，文而不弱，武而不暴，正位居体，执道枢，秉天钧，岿然为一世重…
500	Henan Polytechnic University	明德任责	MOR0; MOR3	“明德任责”就是完善思想品德，勇于担当重任。 明德，意为彰明和完善思想品德；语出《尚书?君陈》“黍稷非馨，明德惟馨”，又见于《礼记?大学》“大学之道，在明明德”。 任责，意为勇于担当责任，语出《宋史》卷三百九十一“此任责，非任怨也”，又见《王阳明全集》卷三“圣人各有忧民之念，而同其任责之心”；与中国传统文化所提倡的“以天下为己任”、“天下兴亡，匹夫有责”一脉相承。 学校建校之初，即勉励学生“为一身计，则勉立修名；为豫生计，则谋臻乐利；为全国计，则图进富强”，要求学生完善品德，以祖国富强为己任，努力学习。抗战期间，学校又以“焦土抗战，最后胜利属于我；工程建设，当前责任不让人”之气概，激励全体学人胸怀天下、勇担重任。在改革开放新的历史时期，学校更是要求学生融入时代洪流，志存高远，心怀大爱，好学力行，报效祖国。 大学最核心的任务是引导人、培养人、完善人，其使命不仅是传授知识，更重要的是造就品德…	【福建省教育厅网站】
501	Zhengzhou University of Light Industry	为之则易,不为则难	ACT	为 学（彭端淑） 天下事有难易乎？为之，则难者亦易矣 ；不为，则易者亦难矣。人之为学有难易乎？学之，则难者亦易矣；不学，则易者亦难矣。 吾资之昏，不逮人也；吾材之庸，不逮人也。旦旦而学之 ，久而不怠焉，迄乎成 ，而亦不知其昏与庸也。吾资之聪，倍人也 ；吾材之敏，倍人也；屏弃 而不用，其与昏与庸无以异也。圣人之道，卒于鲁也传之 。然则昏庸聪敏之用，岂有常哉！ 蜀之鄙 有二僧，其一贫，其一富。贫者语于富者 曰：“吾欲之南海 ，何如 ？”富者曰：“子何恃而往? ’曰：“吾一瓶一钵足矣 。”富者曰：“吾数年来欲买舟而下 ，犹未能也。子何恃而往？”越明年 ，贫者自南海还 ，以告富者 。富者有惭色 。 西蜀之去南海，不知几千里也，僧富者不能至而贫者至焉。人之立志，顾不如蜀鄙之增能 ？是故聪与敏，可恃而不可恃也；自恃其聪与敏而不学者，自败者也。昏与庸，可限而不可限也；不自限其昏与庸而力学不倦者，自力者…
502	Henan University of Technology	明德、求是、拓新、笃行	MOR0; SCH; INNO; ACT	明德，旧谓美德，《尚书•君陈》“黍稷非馨，明德惟馨”，美德比粮食更馨香。《大学》“大学之道，在明明德，在亲民，在止于至善。” 求是，求乃探索、寻取之意，是则为正确或认为是正确的。寻求科学真理。 拓新，拓乃开辟、扩充之意，拓新则创新之意。 笃行，笃乃忠实、专一之意，笃行系诚挚而专一的践行。 总意：高尚的情操、美好的品德；通过探索去求真，努力创新并专注地践行。
503	Henan University of Science and Technology	明德博学、日新笃行	MOR0; SCH; INNO; ACT	“明德、博学、日新、笃行”，语出《大学》《中庸》，各个部分相对独立，具有各自的特定内涵；又相互统一，构成包括德才兼备、知行合一的完整思想体系。 “明德”，即完美德行，意为大学的宗旨在于弘扬光明正大的品德，使人达到最完善的境界。 “博学”，即广泛学习，意为通过广泛学习，深入研究，达到学识渊博之目的。 “日新”，即天天更新，日日进步，意为弃旧图新，创新进步，每天以最新的面貌面对学习和生活。 “笃行”，即踏踏实实，坚持不懈，意为努力践履所学，做到“知行合一”。 学校谨遵“明德、博学、日新、笃行”的校训，体现了自强不息、追求卓越的大学精神。
504	Zhongyuan University of Technology	博学弘德、自强不息	SCH; MOR0; WILL	博学——出自《 论语》：“博学而笃志，切问而近思”。既指广泛学习，也指学问渊博。学校重视科学精神与人文精神的融合；倡导刻苦学习，勤奋实践，博采众长，学以成才、学以立业、学以报国；倡导用新的思想观念和思维方式，不断获取新知，勇于探索真理。 弘德——出自东晋《 华阳国志》:“思弘德化，思弘德教”。主要涵义是指弘扬人类的文明与美德。学校重视道德情操与法制精神的统一；倡导培养健全人格，培育民族精神，以德立身，以德立校，以德立国；倡导学会做人，全面发展，志向远大，追求更高的人生目标。 自强不息——出自《 周易》：“天行健，君子以自强不息”。主要涵义是指君子应刚毅坚卓，不屈不挠，生生不息。学校几上几下的曲折发展历程，体现了自强不息的民族性格。学校重视遵循客观规律，锐意进取，永不懈怠，同心同德，不断在更高的标准上发展壮大。
505	Henan Agricultural University	明德自强，求是力行	MOR0; WILL; SCH; ACT	河南农业大学的校训是“明德自强，求是力行”，简单的八个字却蕴含了深刻的文化内涵。从本期开始，我们每次都介绍校训的两个汉字，让大家从中品味中华民族的厚重历史和传统智慧，并以此激励自己不忘初心，砥砺前行。 明 明的本义是明亮。甲骨文以“日、月”发光表示明亮，是一个会意字。左边是日，右边是月。小篆却写成朙，左边是囧(jiǒng)，像一个明亮的窗口，所以是光明的意思。 “囧”从2008年开始在中文网络社群间变为一种流行的表情符号，被赋予“郁闷、悲伤、无奈”之义，此义在古代是没有的。 明是一个常用字，它的许多义项都是褒义，比如清晰明亮、聪明睿智、公开透明。不仅人们给孩子取名喜欢用，给建筑物品取名和题写匾额、对联也喜欢用。比如明堂，是古代帝王所建的庄严隆重的场所，用于宣明政教和举行典礼。乾清宫正殿高悬着清代顺治皇帝御笔亲书的“正大光明”匾，词语来自朱熹的文章，义为心怀坦白，言行正派。 校训中的“明德…
506	Henan Institute of Science and Technology	崇德尚能、知行合一	MOR0; PROF; ACT	“崇德”，就是崇尚和发扬完美的道德品性，出自《论语·颜渊第十二》：“主忠信，徙义，崇德也。”意我校广大师生注重思想道德修养，以弘扬中华民族的优秀传统文化、建设现代文明为己任，追求更高的思想道德目标。它体现了我校德育为先的办学理念。 “尚能”，即重视“能”，是我校办学特色——培养富有创新精神和实践能力的应用型高级专门人才的重要体现，意为重视能力培养、重视素质全面提高。 “尚能”，要求教职工爱岗敬业，具有较高的教学、科研及服务能力；要求学生努力提高知识应用、专业技术、继续学习、创新创业、适应社会等多方面能力。 “知行合一”，即知行统一。“知行合一”是明朝思想家王阳明提出来的，他认为知行是统一的。知行合一就是理论联系实际,用理论指导实践,用实践来检验理论,努力培养理论与实践相结合的人才,深刻地反映了与时俱进、科学发展的时代精神。“知行合一”意在要求全校师生员工既要追求真理、善于学习，又要勇于实…
507	Henan University of Animal Husbandry and Economy	尚严崇实、善知敏行	DIL; ACT; SCH; ACT	1.尚严：尚，尊崇，注重。尚严：崇尚“严密、严谨、严明、严格”的治校方略，一是“学科之严密”，二是“教学之严谨”，三是“纪律之严明”，四是“管理之严格”。 2.崇实：崇尚实际、实践；崇尚朴实、务实。汉王充《论衡·定贤》：“文丽而务巨，言眇而趋深，然而不能处定是非，辩然否之实，虽文如锦绣，深如河汉，民不觉知是非之分，无益於弥为崇实之化。”“崇实”，一是在思想上崇尚实事求是，求真务实，诚实朴实，做事踏实；二是在培养人才上突出应用型本科教育特点，工学结合，注重实践教学，注重实践育人。 3.善知：善，一是指好的行为、品质；二是指善于，擅长。知，晓得，明了；学识，学问。善知，一是强调教育以人为本，德育为先，突出品德教育；二是强调学习的方法，探求、辨析、思辨的过程；三是强调学识、学问的获得程度和技能掌握的水平。善知，教育之本，教育之体，教育之用，善知方能善育，善知方能成才。 4.敏行：语出《论语·里…
508	Henan University of Chinese Medicine	厚德博学、承古拓新	MOR0; SCH; INNO	厚德博学：要有大德，心胸宽广不以个人得失为主；有德的同时也要学识渊博，知识丰富，见多识广。承古拓新：传承自古以来的优秀科学文化知识，弘扬优良科学文化传统，继承传统，努力创新。
509	Xinxiang Medical University	明德博学、至爱致用	MOR0; SCH; MOR2; ACT	“明德”：出自《大学》开篇“大学之道在明明德，在亲民，在止于至善。”意谓为学者要学到高层次的学问，必须推崇高尚的品格和德行，具有崇高的品德和完备的人格。 “博学”：出自《论语》“博学而笃志”， 意谓为学者应广泛学习，博采众长，学识渊博，方能集成大家。 “至爱”：出自古语“大道至简，大医至爱，适者有寿，仁者无敌”,意谓成就“苍生大医”者必有至真至诚之爱心。 “致用”：出自《周易》“备物致用，立成器以为天下利。” 学者贵崇实尚用，学术愈精，应用愈广，则贡献愈大。 校训是一所学校的灵魂，短短几字之中，彰显出学校的精神气质。“明德”源于《大学》：“大学之道，在明明德，在亲民，在止于至善。”明德意思是大学最高的为学之道，是要教导学生彰显自己与生俱来的美好光明的德性，使人革旧从新，身体力行，最终达到内心清明美善的最高境界。唐代著名医学家孙思邈在《千金方》中如此阐述，“人命至重，有贵千金，一方济之，德…
510	Henan University	明德新民,止于至善	MOR0; MOR3; MOR1	“明德新民、止于至善”出自《礼记·大学》开篇“大学之道，在明明德，在亲民，在止于至善”。20世纪30年代，在中华民族面临危难之际，河南大学将这八个字确立为校训，表明师生不忘兴学办校之初衷，始终将弘德明志、启智为民、民族振兴作为己任的崇高理想和不懈追求。 如今，河南大学已走过110个春秋，“明德新民、止于至善”早已融进河南大学的精神底色，成为引领全体河大人奋发前行的精神“风向标”。穿越历史和现实的天空，河大师生也以一次次行动、一张张成绩单恪守、践行、传承着校训，不断赋予其与时俱进的深刻内涵，不断诠释高等教育的至高追求——大学之道，唯有不止。 明德：文脉绵长 兴学育人 新民：国之大者 奋楫一流 至善：踔厉奋发 勇毅前行 “止者，必至于是而不迁之意。至善，则事理当然之极也。言明明德、新民，皆当至于至善之地而不迁。”“至善”是河南大学对教育事业的永恒理想和不懈追求。 至善之意，在于守正创新，永攀…
511	Henan Normal University	厚德博学、止于至善	MOR0; SCH; MOR1	“厚德博学 止于至善”，意为河南师范大学的每一个人，无论是修德还是进学都应当不懈的努力，追求达到最高的境界。如此方能担当起国家强盛、民族振兴之伟业所赋予历史重任，为学校增光添彩。 “厚德”语出《易传》：“地势坤，君子以厚德载物。”大地因宽厚，得以承载万物；有学问的人应以大地为楷模，培养容人容物的雅量，以宽厚而高尚的德行承担重大责任。 “博学”语出《论语·子张》：“博学而笃志，切问而近思，仁者在其中矣。”意思是广泛地学习并且专心致志；学有疑之要及时问，且只问己所学中未曾理解的问题而不泛滥的问，并且就习知易见者思之，于是情志好生爱人之德就在其中了。《礼记·中庸》：博学之，审问之，慎思之，明辨之，笃行之。博学，既有学问博大精深之意，又有广泛学习，学识渊博之说。 “止于至善”语出《礼记·大学》：“大学之道，在明明德，在亲民，在止于至善。”朱熹注：“止者，必至于是而不迁之意；至善，则事理当然之极也…
512	Xinyang Normal University	厚德崇实、善学敏行	MOR0; ACT; SCH; ACT	厚德：语出《易经》：“天行健，君子以自强不息；地势坤，君子以厚德载物。”厚德与大学精神一致。《大学》有云:“大学之道，在明明德，在亲民，在止于至善。”德是做人根本，厚德是成才的前提，也是为师的职业操守，同时惟有厚德才能包载万物，兼容并蓄，这也体现了现代大学的办学理念。 崇实：语出《论衡 · 定贤》：“虽文如锦绣，深如河汉，民不觉知是非之分，无益于弥为崇实之化。” 崇实本意为崇尚实际、崇尚朴实。崇，有尊重、推重之意。崇实体现了“以真为本、以实为基、以干为荣”的理念，也与我校“四实”（诚实、扎实、踏实、朴实）人才培养目标一致。 善学：语出《礼记 · 学记》：“善学者，师逸而功倍，又从而庸之。” 善学既符合传统为学精神，又能体现时代发展要求。在当今这个信息化时代，不仅要博学、勤学，更要善学，惟有善学，才能学有所得、学有成效。对从教者而言，理应“善学乐教”，惟有善学才能善教，善学是近知之道、立教…
513	Zhoukou Normal University	尊道贵德、博学善建	MOR1; MOR0; SCH; PROF	“尊道贵德”语出《道德经》第51章“道生之，德畜之，物形之，势成之，是以万物莫不尊道而贵德”。道是事物生长的根本和遵循的规律；德是道的体现，是高尚的操守和行为规范。道生成万事万物，德养育万事万物。学校要按大学发展的规律办学，按人才培养的规律教学，按科学管理的规律治校；作为师范院校，师生要注重立德修身，崇尚“师道”、“师德”，坚持育人为本，德育为先的素质教育理念，促进学生德智体美劳全面发展。 “博学”语出《中庸》“博学之，审问之，慎思之，明辨之，笃行之”，意为广泛地学习。“善建”语出《道德经》第54章“善建者不拔”，意为善于创建伟业的志士，其意志坚韧不拔，并能够靠其实现自身的理想。八字校训包含了道德和学问两大层面，鼓励师生注重品德修养，砥砺坚强意志，追求广博学识，倡导敬业奉献。校训用语，源于道家经典《道德经》和儒家经典《中庸》，既具有鲜明的地域文化色彩，又体现了中国传统文化儒道互补的特点。
514	Anyang Normal University	进德修业、博学笃行	MOR0; PROF; SCH; ACT	出处： 1.《周易·乾》:“君子进德修业。忠信，所以进德也；修辞立其诚，所以居业也。……君子进德修业，欲及时也。” 2.《四书·中庸》:“博学之，审问之，慎思之，明辨之，笃行之。有弗学，学之勿能，弗措也；有弗问，问之弗知，弗措也；有弗思，思之弗得，弗措也；有弗辨，辨之弗明，弗措也；有弗行，行之弗笃，弗措也。人一能之，已百之；人十能之，已千之。” 涵义： 高等院校的办学宗旨是为国家培养有用的人才，衡量优秀人才的标准是德才兼备。要培养德才兼备的优秀人才，需要有德才兼备的优秀教师。因此，不论教师还是学生，都需要不断提高自己的道德修养和业务能力。广泛地获取知识、理论并且能够把它运用到社会实践中去，则是提高道德修养和业务水平的必由之路。这条校训强调德才兼备、知行合一，比较全面地概括了高校的办学宗旨、优秀人才的培养标准和培养人才的有效途径。另外，构成这条校训的两个短语分别出自我国古代的两部经典文献，…
515	Xuchang University	崇德砺志、博学敬业	MOR0; WILL; SCH; PROF	八字校训包含了做人和做事、道德和学问两大层面的问题。即鼓励师生注重品德修养，砥砺坚强意志，追求广博学识，倡导敬业奉献。 "崇德"，见于《书.武成》："惇信明义，崇德报功"。崇德就是要注重立德修身，重视品德教育。对教师而言，要以德立业，身正为范，身教重于言教，以嘉言懿行垂范于学生；对学生而言，学校要坚持育人为本，德育为先的素质教育理念，努力把学生培养成为有理想、有道德、有文化、有纪律的"四有"新人，培养成为德智体美全面发展的社会主义事业合格建设者和可靠接班人。 "砺志"就是砥砺意志，奋发有为。旨在倡导和勉励广大学生和教师在人生征程上和工作实践中志存高远、坚韧不拔、奋发向上、开拓进取，勇于战胜各种困难和挫折，具有永不言败的意志力。 "博学"，语出《论语》："君子博学于文，约之以礼"；而《中庸》所述更详："博学之，审问之，慎思之，明辨之，笃行之"。博学就是学识渊博，基础扎实。学校坚持以教学为中…
516	Nanyang Normal University	博学求是、笃行自强	SCH; SCH; ACT; WILL	博学——学识渊博、造诣精深。《礼记·中庸》有言：“博学之，审问之，慎思之，明辨之，笃行之。” 求——追求真理，探究本质。 是——实事求是，追求本真；陶行知先生有言：“千教万教教人求真，千学万学学做真人。” 笃——持之以恒，自强不息。 行——切实履行，专心实行。《礼记·儒行》有言：“儒有博学而不穷，笃行而不倦。” 自强——自我勉励，奋发图强。《楚辞·九章·怀沙》有言：“惩连改忿兮，抑心而自强。”
517	Luoyang Normal University	敬业奉献,为人师表	PROF; MOR3; PROF	洛阳师范学院是具有良好办学传统的高校，是教师的摇篮。我们的校训是：“敬业奉献，为人师表”。校训是培养学生的目标，是引导事业的方向。“敬业”，从业忠诚不移，工作勤勉毋懈，是对教育事业的神圣感和责任心。“奉献”，无私无我，热爱教育对象，是师德的核心。“为人师表”，言教身教并举，经师人师同求，是训练学生的规矩，培养学生的目标。
518	Shangqiu Normal University	应天归德、智圆行方	ACT; MOR0; SCH; ACT	“应天”、“归德”都是商丘古地名，北宋置应天府在宋州（今河南商丘），因宋太祖赵匡胤在后周曾任归德节度使，治所在宋州，故升宋州为应天府，为宋朝的南京，作为东京汴梁的陪都。 “应天”意指主动顺应天道自然，遵循规律，而循规律顺时事者必事半而功倍。“归德”意指“旨归在德”，即要求人们回归到共同生活及行为的准则和规范，也反映了教育之最终目标在于提升人的素质、完善自我与他人之人格。 “应天归德”四个字巧妙借用商丘古地名中蕴含的丰富文化元素，既凸显了商丘师院独具的地域特色，又展现出商丘师院传承应天府书院办学精神，顺应时代发展，培养德才兼备人才的办学目标。 “智圆行方”，语出《淮南子·主述训》：“心欲小而志欲大；智欲员（圆）而行欲方。”形容知识要广博周备，行事要方正不苟，有雄才大志又品正方行实现德与才的结合。 “归德”，意指“旨归在德”，即要求人们回归到共同生活及行为的准则和规范，寄望莘莘学子通过书院生…
519	Henan University of Economics and Law	博洽通达、弘毅致远	SCH; ACT; MOR1; WILL	博洽：学识广博。《后汉书·杜林传》：“京师士大夫，咸推其博洽。” 李贤注：“博，广也。洽，徧也。言其所闻见广大也。” 通达：通晓豁达。《礼记·学记》：“九年知类通达，强立而不反，谓之大成。”也谓通情达理。汉刘向 《列女传·鲁季敬姜》：“ 文伯之母，号曰敬姜，通达知礼，德行光明。” 弘毅：宽宏坚毅。取自《论语·泰伯》：“士不可以不弘毅，任重而道远，仁以为己任，不亦重乎？”朱熹注解：“弘，宽广也，毅，强忍也，非弘不能胜其重，非毅无以至其远。” 致远：追求卓越。诸葛亮《戒子篇》：“夫君子之行：静以修身，俭以养德。非淡泊无以明志，非宁静无以致远。” “博洽通达 弘毅致远”是一个有机、有序的整体，四者紧密相联，不可分离或缺位。“博洽”是为学基础，“通达”是为人情怀，“弘毅”是精神品质，“致远”是成功境界。
520	Zhengzhou University of Aeronautics	严谨、求实、开拓、进取	DIL; ACT; INNO; WILL	郑航精神：空天报国 砺新图强 学校使命：服务国家航空航天战略和区域经济社会发展，培养符合时代要求的高素质复合型创新人才。 发展愿景：成为国内知名、国际上有一定影响力的高水平航空航天大学。 形象宣传语：传承红色血脉 追求蓝色梦想 行为准则：笃学敬业 严慎细实 郑州航空工业管理学院秉承“严谨、求实、开拓、进取”之校训，坚持“德育首位，教学中心，质量至上，育人为本”的办学理念，树立“协同办学、协同育人、协同创新”的发展理念，坚持“立足航空产业，服务区域经济”的服务面向，形成了“航空为本，管工结合”的办学特色，确立了在航空工业管理和技术应用研究领域中的较强优势。学校学生工作以服务学生成长成才为中心，以队伍建设为基础，工作创新为动力，以特色品牌建设为载体，努力实现日常工作有效率，重点工作有突破，思政工作有成效，不断开创学生工作新局面。
521	HuangHuai University	厚德、博学、笃行、自强	MOR0; SCH; ACT; WILL	“厚德”,心胸宽广不以个人得失为主，重公轻私，谓之厚德。《周易》中的卦辞：“天行健，君子以自强不息；地势坤，君子以厚德载物”。《河南程氏粹语·论道篇》中说：“一德立而百善从之。” 博学，语出《礼记·中庸》:“博学之，审问之，慎思之，明辨之，笃行之。”博学：“博”,大通也。现代综合性大学，在专业、学科等方面都应具有“博”的特点，在学术思想、学术风格、学术观点上应兼容并包、百花争艳；作为教师，应学识渊博、造诣精深；作为学生，应打下厚实的功底，全面提升综合素质。 “笃行”,源自《礼记·中庸》:博学之，审问之，慎思之，明辨之，笃行之。《礼记·儒行》:“儒有博学而不穷，笃行而不倦。”笃行是为学的最后阶段，就是既然学有所得，就要努力践履所学，使所学最终有所落实，做到“知行合一”。“笃”有忠贞不渝、踏踏实实、一心一意、坚持不懈之意。只有有明确的目标、坚定的意志的人，才能真正做到“笃行”。 “自强”,《…
522	Pingdingshan University	厚德、博学、求是、创新	MOR0; SCH; SCH; INNO	建校以来，平顶山学院秉承“厚德、博学、求是、创新”的校训，在一代代学院人的不懈努力中，逐渐形成了“严谨求实，和谐自强”的优良校风和“艰苦奋斗，自强不息，团结奉献”的精神，在人才培养、科学研究、服务社会、文化传承创新、国际交流合作过程中实现着自身的价值。
523	Zhengzhou University of Technology	修德、敏学、笃行、拓新	MOR0; SCH; ACT; INNO	“修德敏学，笃行拓新”的八字校训从不同的方面体现了我校“培养面向生产服务一线，具有良好道德品质、富有创新精神和高度社会责任感，掌握专业知识，实践能力突出，拥有就业创业和继续学习能力的高素质技术技能型人才”的培养目标。理解了这八个字，就理解了学校的精神文化。
524	Luoyang Institute of Science and Technology	致知，致善，致能，致新	SCH; MOR1; PROF; INNO	65年来，洛阳理工学院在党的坚强领导下，秉承“致知 致善 致能 致新”的校训，坚守为党育人为国育才初心、牢记服务行业服务地方使命，在特色鲜明的高水平应用型大学建设的道路上阔步前行，为社会培养输送了20万名高级专门人才。
525	Xinxiang University	开放、包容、求实、创新	INNO; INCL; ACT; INNO	开放：是现代大学制度的重要标志，是学校顺应高等教育开放性、国际化发展趋势，推进内涵建设的重要举措，是学校发展的必由之路。开放既是一种思维，也是一种姿态，更是一种气度，面向社会，面向世界，使学校教育融入社会之中。从内部来看，就是要树立开放的办学理念，改变过去封闭办学的观念、模式；从外部来看，就是要强化与地方的密切交流与合作，为地方经济社会的发展服好务；加强与世界的开放与交流，迎接高等教育国际化挑战。 包容：基本的意思是宽容、接纳。就是心之大而包宇内，盟之广而裹八方，观之远而览天下，志之宏而向全球，胸之阔而纳万物。博采众长、兼容并包、尊重差异、和谐共生是一所大学最基本的精神和特征，也是大学应有的学术环境和氛围。同时，开放和包容既密不可分又相互砥砺：开放是包容的前提和基础，包容是形成开放格局并进一步促进开放的文化保障。开放、包容很好体现了学校海纳百川的胸襟，兼收并蓄的智慧和厚德载物的气魄。 求…
526	Xinyang Agriculture and Forestry University	志向立高远、学问做精细	WILL; SCH	广大师生应立足岗位，立足现实，胸怀远大志向，锐意进取，要有科学严谨的态度，勤学好问，力求把知识学精学透学细，不可浅尝辄止。特别是两个动词“立”和“做”，起到了强调的作用，“立”，强调了树立远大志向的自主性、主动性；“做”，强调了在学习和研究中要亲力亲为，踏实勤奋。“学问”既泛指知识、学识，也强调了学习要有学有问，在学中问，在问中学。
527	Henan Institute of Technology	厚德、博学、求实、创新	MOR0; SCH; ACT; INNO	学校历史底蕴深厚，办学资源丰富。学校在工学结合中诞生、在校企合作中发展。1975年建校以来，历代河工人发扬“开拓进取、自强不息”的学校精神，弘文励教，薪火相传，涵养了“厚德、博学、求实、创新”的校训、“团结、创造、竞争、快乐”的校风、“修德、爱生、敬业、善育”的教风、“勤学善思、知行合一”的学风，校风淳、教风正、学风浓。
528	Anyang Institute of Technology	明德修身、立风养性、博学致知、笃行建业	MOR0; MOR1; MOR1; SCH; ACT; PROF	释义： 校训融汇先贤哲思，融入时代精神，高度概括了学校的办学理念、治校方略。“明德修身”与“立德树人”根本任务和“德智体美劳”发展目标相统一，强调以德为先，先修德再修学，注重涵养思想品德、价值观念、人文素养，常省己身、常怀家国；“立风养性”强调的是校风、教风、学风的树立和学生性格的养成，注重顶层设计、制度建设、言传身教，见贤思齐、沉凝底蕴；“博学致知”是指在做学问时，要博览群书、博采众长、博涉诸事、勤学善思、知行合一；“笃行建业”是指在做事情的态度和精神方面，能学以致用、扎实做事、深入钻研、勇于创新、建功立业！ 出处: 1. 《四书·大学》:“大学之道，在明明德，在亲民，在止于至善。”、“欲齐其家者，先修其身……自天子以至于庶人，壹是皆以修身为本。”、“欲诚其意者，先致其知。致知在格物。” 2. 《四书·中庸》：“博学之，审问之，慎思之，明辨之，笃行之。” 3. 《四书·孟子·尽心上》:…
529	Henan University of Engineering	自强不息、博学精艺	WILL; SCH; DIL	“自强不息”出自《周易》“天行健，君子以自强不息”。意谓以刚毅坚卓的品质，发奋图强，奋斗不止。“博学”源自《中庸》“博学之，审问之，慎思之，明辨之，笃行之”的首句。“博学”意谓为学要广泛猎取，采纳众长，兼容并包，真正做到“海纳百川、有容乃大”。 “艺”是指“六艺”，出自《周礼•保氏》：“养国子以道，乃教之六艺：一曰五礼，二曰六乐，三曰五射，四曰五驭，五曰六书，六曰九数。”六艺是古时儒家要求学生掌握的六种基本技能，现在泛指用以安身立命的各种才能、技艺。“精艺”就是要精通学业专长，精湛专业技术，这与学院工科为主的办学特色要求相匹配。 以“自强不息 博学精艺”为校训，其一是彰显学院的办学精神：奋发向上，奋斗不止，以世界性的眼光和开放的胸襟，博采众长，强化特色，培养专业扎实、技艺精湛的人才。其二是激励师生刚毅自强，在前进道路上永不停息，广泛学习，掌握广博的科学知识，锻造精良的专业技能。
530	Henan Finance University	明德笃学、知行合一	MOR0; SCH; ACT	校训：“明德笃学 知行合一”释义“明德”语出《尚书•君陈》“明德惟馨”，意为真正能够发出香气的是美德；又见《礼记•大学》“大学之道，在明明德，在亲民，在止于至善”。意为大学的宗旨在于彰显光明正大的品德，在于使人革故鼎新，并且推己及人，把这种品性运用到教育和引导人上去，使自身的境界达到至善至美。“笃学”语出《论语》“笃信好学”，意为专心好学。“知行合一”由明代哲学家王阳明提出，意为知中有行、行中有知,以知促行、以行促知，理论与实践相统一。校训强调以德为先、德才并育，要求师生既要重视道德品质和思想修养，坚定科学信仰，追求远大理想，又要重视知识和技能的学习，更要将学到的东西，落实到行动上，做到知行合一、以知促行、以行求知，勇于创新，与时代同行。它传承弘扬中华优秀传统文化，具有鲜明时代气息，集中体现了学校坚持立德树人根本任务、建设应用型本科高校的办学特色和理念。 校风：“爱国 诚信 团结 奋进”…
531	Nanyang Institute of Technology	厚德、博学、求真、至善	MOR0; SCH; SCH; MOR1	“厚德”是求学治学的前提和基础；“博学”是求学治学的过程和目标；“求真”是求学治学的态度和方法；“至善”是做人治学的境界和理想。 “厚德”：语出《周易坤卦》“地势坤，君子以厚德载物。”意谓大地势厚顺和，君子应增厚美德，容载万物。“厚德”是中华民族的传统美德，是中国文化的基本精神，同时具有鲜明的时代特征，“德智体美，德育为先”。引“厚德”二字，意在期望师生员工以高尚的道德立身于世于学，以高尚的道德承载天下重任。 “博学”：语出《论语子张》“博学而笃志，切问而近思。”既指博采众长，亦指学识深厚。“博学”是学习之道，是勤学之果。引“博学”二字，意在倡导学生兼容并蓄，文理齐修，涉猎百科，成为复合型的栋梁之才；教师更新理念，创新教法，完善学养，成就学贯中西的专业大师。 “求真”：出自《闽中理学渊源考》“求真于未始有伪之先，而性之真可见矣。”意指崇尚科学，追求真知，同时包含有讲究真才实学之意。“求真…
532	Henan University of Urban Construction	厚德唯实、博学慎思	MOR0; ACT; SCH; REAS	一、厚德 ——厚：优待、推崇、重视；德：道德、品行、政治品质; 《庄子》说 “厚德载物”；《春秋传》指出：“德厚者流光，德薄者流卑”。《世说新语》中讲“百行以德为首。”《大载理记》讲：“行德则兴，背则崩”。司马光在《资治通鉴》认为：“才者，德之资也；德者，才之帅也。”中华民族无数志士人之所以重志进取，就在于他们自身追求崇高人格的“厚德”精神，它还是培育华夏子孙千百年来光明磊落、刚正不阿、公正无私的高尚情操。为此，大学生要“齐家、治国、平天下”，修身为前提。崇高之德是中华民族精英之灵魂和统帅，是中华民族千百年来无数仁人志士奋斗不息，开拓进取的精神内涵和远大人生价值取向，“厚德”就是要求我们培养的学生在“爱国守法、明理诚信、团结友善、勤俭自强、敬业奉献”的基本道德规范上升到有崇高的理想、高尚的情操、完善的人格、规范的行为、志存高远，坚定信念，确立正确的世界观、人生观、价值观、用马克思列宁主义…
533	Henan Police College	忠诚，团结，求实，开拓	MOR3; MOR2; ACT; INNO	办学理念： 政治坚定、体能充沛、业精技良、法治思维 校 训： 忠诚、团结、求实、开拓
534	Railway Police College	至诚至公,敏学笃行	MOR1; MOR1; SCH; ACT	至诚至公——至：极、最、非常；诚：真诚，忠诚。公：即公正、公平。“至诚”，出自《中庸》“唯天下至诚，为能经纶天下之大经，立天下之大本，知天地之化育”，意为极为诚恳、诚心诚意。“至公”，《后汉书》“秉至公以服天下，大略也”， 意为最公正，极公正。 敏学笃行——“敏学”，出自《论语》“敏而好学，不耻下问，是以谓之文也”，意为勤奋好学。“笃行”，出自《礼记》“儒有博学而不穷，笃行而不倦”；《中庸》“博学之，审问之，慎思之，明辨之，笃行之”，意为一心一意，践履所行，知行合一。 校训，是学院高度凝炼的办学理念与治校精神的符号表征,是校风、教风、学风的集中表现，体现学院文化精神的核心内容，是全体师生共同遵守的基本行为准则、道德规范与价值追求。 “至诚至公，敏学笃行”作为校训，体现了学院建校七十余载全体师生的共同追求和价值取向，是学院办学思想与办学理念的高度凝炼，是学院发展历史和文化传承的深厚积淀，彰…
535	Zhengzhou Normal University	格物致知、明德尚善	SCH; MOR0; MOR1	格物致知：出自《礼记·大学》：“欲诚其意者，先致其知；致知在格物。物格而后知至，知至而后意诚。”《现代汉语词典》解释为：穷究事物的原理法则而总结为理性知识；其包含了实事求是、追求真理的精神。引“格物致知”期望广大师生要努力追求真理、获取真知、脚踏实地、学以致用。 明德尚善：出自《礼记·大学》：“大学之道，在明明德，在亲民，在止于至善。”，“明德”就是彰显德行，先完善内在德智的修养，然后推己及人；“尚”为推崇、崇尚之意，“尚善”即为崇尚良好的道德。引“明德尚善”二字，意在期望广大师生修身养性，彰显自己心中美好的德性，并为此日日省察于己，敦品励行，自新其德，达到内心清明高尚的境界，并在具体的教育教学活动中贯彻落实。 “格物致知 明德尚善”是我校对广大师生在求知和道德方面提出的要求，一方面要求师生在追求学问的道路上潜心问道，在追求真理的道路上不屈不挠；另一方面要求师生在研究科学知识的同时也要注…
536	Wuhan University	自强、弘毅、求是、拓新	WILL; MOR1; SCH; INNO	1993年，在广泛征求各方面意见的基础上，经校务委员会审议，武汉大学新校训定为：自强 弘毅 求是 拓新。 “自强”语出《周易》“天行健、君子以自强不息”。意为自尊自重，不断自力图强，奋发向上。自强是中华民族的传统美德，成就事业当以此为训。我校最早前身为“自强学堂”，其名也取此意。 “弘毅”出自《论语》“士不可以不弘毅，任重而道远”一语。意谓抱负远大，坚强刚毅。我校30年代校训“明诚弘毅”就含此一词。 用“自强”、“弘毅”，既概括了上述含义，又体现了我校的历史纵深与校风延续。 “求是”即为博学求知，努力探索规律，追求真理。语出《汉书》“修学好古，实事求是”。 “拓新”，意为开拓、创新，不断进取。 概言之，我校新校训的整体含义是： 继承和发扬中华民族自强不息的伟大精神，树立为国家的繁荣昌盛刻苦学习、积极奉献的伟大志向，以坚毅刚强的品格和科学严谨的治学态度，努力探求事物发展的客观规律，开创新局…
537	Huazhong University of Science and Technology	明德厚学、求是创新	MOR0; SCH; SCH; INNO	华中大的校训是“明德厚学，求是创新”，体现着科学精神与人文关怀的融合。“明德”语出《大学》“大学之道，在明明德”，意为彰明伦理；“厚学”转义出自《易》“坤厚载物”，倡导崇尚知识；“求是”语出《汉书》“实事求是”，强调追求真理；“创新”转义出自《大学》“苟日新，日日新，又日新”，注重与时俱进。校训既饱含文化经典的古朴敦雅，又散发与时俱进的时代气息，凝聚着学校的精神与灵魂，更与社会主义核心价值观一脉相承。 提倡“明德厚学”，就是把涵养人文素质、培育道德品格、造就责任担当放在办学育人的首要位置。学校主要创始人之一、著名教育家朱九思先生“文革”刚结束就提出“走综合化发展之路”，开高校改革风气之先。老校长杨叔子院士疾呼，“一个国家、一个民族，没有科学技术，一打就垮；没有人文精神，不打自垮”，率先扛起文化素质教育的大旗。已故著名医学家裘法祖院士也语重心长，“做人要知足、做事要知不足、做学问要不知足”…
538	Wuhan University of Science and Technology	厚德博学、崇实去浮	MOR0; SCH; ACT	我校校史沿革，可上溯到张之洞在武昌昙华林创办的湖北省中等工艺学堂。不仅“崇实去浮”与张之洞的办学思想直接有关，而且“厚德博学”也是他一贯的理念。1873年9月，张之洞出任四川学政，倡导“通经致用”的治学宗旨。为了改良学风，张之洞于1875年春创办了尊经书院，希望培训一批“通博之士，致用之才”。他提出“非博不通，非专不精”的治学方法，认为经学、史学、小学（指文学、训诂、章韵诸学）、地理、算术、经济、诗词、古文等都有学问，应该“无所不通”。他要求学生认真读书，涉猎广泛，同时又根据自己的兴趣与爱好，选择二、三门“专门精求”，“期必有成”。该院严格的教学制度和考试程序，使学生处于一种竞争奋进的学习环境。张之洞在其治学经验谈中对士子提出“德行谨厚”、“人品高峻”、“立志远大”、“砥砺气节”等品德行为方面的要求，提出了读书治学的一些重要原则，如“读书宜读有用之书”，“读书期于明理，明理归于致用”等。…
539	Yangtze University	长大长新	INNO	“长”（cháng）的含义：一是时间概念，即长久、永恒之意。二是空间概念，指两端之间距离大，与短相对；指高，与矮相对；指远，与近相对，引申为宽阔、宏大和高远。三是指擅长、特长。在读作“长”(zhǎng)时，则有生长、增进和抚育、培育之含义，《诗·小雅·蓼莪》：“父兮生我，母兮鞠我，拊我畜我，长我育我。”还有重视、崇尚之意，《书·牧誓》：“乃惟四方之多罪逋逃，是崇是长，是信是使。” “大”的含义：大与小相对，有品位、层次、程度之意，还有尊重、赞美、美好之意。在此指大学、大学生、大学者、大学问、大志向、大境界。蔡元培言：“大学者，研究高深学问者也。”梅贻琦言：“大学者，非大楼之谓也，乃大师之谓也。”学校要坚持不懈地培养大学生，造就大学者，追求大学问。大学生、大学者要做大学问，关键在于要有大志向，有志者事竞成。大学问会使学生、学者们的精神升华到大境界，从而会促进学校的品位升华到大境界。 “新”…
540	Wuhan Institute of Technology	格物明理、致知笃行	SCH; MOR1; SCH; ACT	2012年1月4日确定。“格物”、“致知”出自《礼记·大学》“致知在格物，物格而后知至”。 五秩风华正青春，守正创新向未来。学校将持续坚持以习近平新时代中国特色社会主义思想为指导，全面贯彻党的教育方针，落实立德树人根本任务，践行教育科技报国使命，践行“格物明理 致知笃行”的校训和“艰苦奋斗、自强不息”的校园精神，大力弘扬现阶段勤学实干、毕力同心、共创一流的精神状态，完善现代治理，抓紧建成适应现代化工大产业的区域一流行业特色高校，为湖北加快建设全国构建新发展格局先行区、加快建成中部地区崛起重要战略支点、奋力推进中国式现代化湖北实践贡献工大力量。
541	China University of Geosciences, Wuhan	艰苦朴素、求真务实	DIL; SCH; ACT	校训“艰苦朴素 求真务实”，是校友温家宝于1994年10月19日回母校后为学校的题词。“艰苦”，就是要发扬艰苦奋斗的精神，不畏艰难困苦，勇攀科学和人生的高峰，奋力达到光辉的顶点。“朴素”，就是要保持朴素无华的本色，言行诚实、生活简朴，不虚假，不奢侈，不浮夸，永葆真情、永做真人。”求真”，就是要坚定追求真理的信念，不迷信权威、不因循守旧，努力探索和实践，揭示自然的奥秘、社会的法则和人生的真谛。“务实”，就是要发扬务实前行的作风，不图虚名、不鹜虚声，惟以求真的态度，做踏实的功夫，永远向前看，向前做，向前行。
542	Wuhan Textile University	崇真尚美	SCH; PROF	“崇真尚美”为武汉纺织大学校训。“崇”，是推崇、追求、践行之意。“真”有两层含义：一是指事物的本性、本源和自然界的根本法则，即客观真理；二是指人性的真诚、诚实。陶行知说：千教万教，教人求真；千学万学，学做真人。“崇真”即是全校师生实事求是，追求真理，崇尚真诚。崇真是我们在科学上追求至真，道德上追求至善的统一。 “尚”，即尊崇、注重、追求之意。“美”蕴涵着心灵美、语言美、行为美、环境美等丰富的内容。“尚美”是“美在纺大”的文化追求，即全体师生对心灵、语言、行为、环境之美的崇尚与追求。“尚美”不仅是人的天性，更是一种高尚的人生境界。 大学历来是文化建设的首善之区和核心腹地。在新时代“双一流”建设的新征程中，武汉纺织大学秉承“崇真尚美”校训，以传承创新大学文化为己任，落实立德树人的根本任务，引导广大师生厚植“自强不息、经天纬地”的大学精神，培育美的心灵、践行美的行为。
543	Wuhan Polytechnic University	明德、积学、砺志、笃行	MOR0; SCH; WILL; ACT	我校校训中的“明德”出自《大学》“大学之道，在明明德，在亲民，在止于至善”，将其列于校训首位，体现了我校“育人为本、德育为先”的办学指导思想；“积学”源自刘勰的《文心雕龙》“积学以储宝”，意指从博览广识中不断积累知识和经验；“砺志”意为磨砺意志，也有树立远大志向之意；“笃行”出自《礼记·中庸》“博学之，审问之，慎思之，明辨之，笃行之”，意思是“既要学有所得，也要努力践履所学，使所学最终有所落实”，这是学校师生的共同责任，也是高等教育的目的所在。“明德、积学、砺志、笃行”八字校训展示了学校敦厚丰富的精神底蕴和人文内涵，寓意学校德才兼备的培养目标和“知行合一”的教育理念。
544	Wuhan University of Technology	厚德博学、追求卓越	MOR0; SCH; WILL	围绕崇高大学理想和核心价值追求，学校坚持以道德精神和学术创新引领大学教育和大学发展，厚德载物，博学笃行，引领大学止于至善之道；不断追求卓越，把学校建设和发展不断推向新的历史高度，朝着崇高的大学理想不懈奋斗，铸就学校的大学精神。
545	Hubei University of Technology	厚德博学、求实创新	MOR0; SCH; ACT; INNO	厚德：宽厚之德，语出《易经》。《易·乾》：“天行健，君子以自强不息。”《易·坤》：“地势坤，君子以厚德载物。”境界之大，可与宇宙共存，这是古人对德的深博的赞美和向往。教育和科学体系博大精深，惟其博大，更需厚德以载，是寓意我们致力于培养的高素质人才还需具有大地般深厚能载育万物的德行和情操。 博学：学问广博。博，丰富，通晓；学，学问，学识。《论语·雍也》：“君子博学于文，约之以礼。”《礼·中庸》：“博学之，审问之，慎思之，明辨之，笃行之。”强调有厚实的文化底蕴和宽口径的专业基础，此为大学育人之本，授渔之基，人才培养与文化传承是大学创立的原本，学识教化是学人理应具备的素质。 求实：求，探索、研究、追求；实，客观事物的内部联系，即规律性。求实，就是探索、研究事物的客观规律，追求和捍卫客观真理，它是认识世界和改造世界的精髓与前提。高校是认识未知世界、探求客观真理的前沿，科学研究、人才培养、党政管理…
546	Huazhong Agricultural University	勤读力耕,立己达人	SCH; ACT; MOR1; MOR2	勤讀力耕立已達人“勤读力耕”是对学风的倡导，对学问的指引，也是对“知”与“行”辩证关系和成长成才规律的揭示。我校一贯倡导学风建设，勉励学生勒奋刻苦，用心于学，掌握服务国家和社会的知识本领。同时，要求学生积极投身社会实践，用所学的知识和本领改造世界，努力做到知行合 “立己达人”语出自《论语·雍也》:“已欲立而立人，己欲达而达人”。“立己”是指加强自我修养，自强自立，使自己品德高尚、事业有成:“达人”是指要关爱他人、回报社会，使大家共同发展和进步。“立已达人”符合中国知识分子“独善其身兼济天下”的传统美德，是崇高的人生境界也是庄严的社会责任。 “勤读力耕，立已达人”源于我校校歌词“勤读力耕肩重任，立已达人图自强”，2005年经海内外征集、海选、专家评审，学校办公会审议通过定为校训。 “勤读力耕肩重任、立己达人图自强”。 华中农业大学校训中，“勤读力耕”一句极具农林类院校特色。校长李召虎解释，…
547	Hubei University of Chinese Medicine	勤奋、求实、发掘、创新	DIL; ACT; PROF; INNO	勤 奋：好学上进，苦干实干，具有顽强拼搏精神。 求 实：尊重科学，办事认真，严格按照客观规律办事，讲求实效。 发 掘：发掘祖国医药学宝库，使之发扬光大。 创 新：尊古不泥古，广泛运用现代医药学理论和实践成果与现代科学技术开拓创新。
548	Central China Normal University	求实创新、立德树人	ACT; INNO; MOR0; MOR2	华中师范大学主要有三个前身：华中大学、中华大学、中原大学教育学院。自学校创立，华中大学一直秉持“立足本土文化、放眼人类文明”的教育理念；中华大学坚持“成德、达材、独立、进取”的治校准则；中原大学教育学院则坚持“忠诚党的教育事业”的崇高信念。 建国初期，学校依据自身师范的定位，制定了“忠诚、奋发、博学、乐育”八字校训，以此统摄办学思想，规范育人行为。在几十年的办学中，学校一直倡导“尊师爱生”、“为人师表”。学校在筹备建校90周年校庆活动中，制定了“求实创新、为人师表”的新校训，1998年修订为“求实创新、立德树人”。 惟求实而可以创新，惟立德方能树人。八字校训是学校精神的灵魂，体现了华师的办学传统和文化的积淀，代表着人才培养的教育理念，也是面向社会的精神标志。校训的提出意在激励和劝勉在校的教师和学子，使之朝踏实、新颖、有德、成人的方向成长和发展，毕业多年的校友也会铭记于心。
549	Hubei University	日思日睿、笃志笃行	REAS; SCH; WILL; ACT	“日思日睿 笃志笃行”语出我校前身——国立湖北师范学院院长汪奠基先生为国师填写的院歌歌词。意思是每天不倦地学习，勤于思考，就能融会贯通，博大精深；立定志向，始终如一地去追求，然后切实地实践，就能达到理想的目标。它体现了我校一贯的教育目标和培养人才的要求，是学校历史和校风的延续。 “思曰睿”出自《尚书·洪范》：“一曰貌，二曰言，三曰视，四曰听，五曰思。貌曰恭，言曰从，视曰明，听曰聪，思曰睿。”汪奠基先生化用《洪范》原文，推陈出新，改为“日思日睿”，意为每天勤于学习、勤于思考，才能博学通达，与时俱进。“笃志”出自《论语·子张》“博学而笃志”一语，意为广泛地学习，志趣专一。“笃行”出自《礼记·中庸》“博学之，审问之，慎思之，明辨之，笃行之”一语，意为忠实地实践。 我校新校训的整体含义是：树立为中华民族繁荣富强而刻苦学习、敬业奉献的志向，学思结合，知行统一，以脚踏实地的精神和科学严谨的态度，与时…
550	Hubei Normal University	诚、毅、勤、敏	MOR1; DIL; DIL; INNO	诚： 诚实诚恳，光明磊落，处事公道，待人谦和。 毅： 刚强坚毅，目标明确，义无反顾，坚定执着。 勤： 勤奋向上，勇于探索，自强不息，精心耕作。 敏： 思维敏捷，反应灵活，意识超前，创新开拓。
551	Huanggang Normal University	厚德，博学，力行，致远	MOR0; SCH; ACT; WILL	“厚德”，是教育的本质要求。德，之于学生，是为立世之根本；于教师，是为立范之根本；于学校，是为立校之根本；于教育，则更为关乎民族兴亡之根本。厚德方能“载物”，方能有大担当！以德立教，以德立校，德育为先，教育方能担当民族兴亡的重任，学校方能保证教育的健康发展，教师方堪担当教书育人的责任，学生方能肩负起民族的未来！因此，“厚德”位列新校训训词之首，用意深切隽永，尤当谨记。 “博学”，是教育的特色与魅力所在。大学殿堂之神圣，大学之所以成其为大学，一在有博采众长、专注于学的学术传统与教育氛围；二在有道德高尚、学识渊博之师长；三在有潜心向学、孜孜以求的青年才俊。一个由饱学之士组成的群体，才堪代表教育的特色与魅力！当今知性时代，大学要保持这种特色与魅力，弘扬“博学”传统尤为必要。 “力行”，是保持创造活力的本质要求。古人曰“纸上得来终觉浅，绝知此事要躬行”；今人讲“实践是检验真理的唯一标准”。作为一…
552	Hubei Minzu University	博学博爱、立人达人	SCH; MOR3; MOR2; MOR2	博学：语出《论语雍也》：君子博学于文,约之以礼。博，有博大、包容之意。惟有博大和宽容，才能兼容并包，具有世界眼光和开放胸襟，真正做到“海纳百川、有容乃大”。“博学”，指广博地获取知识，也指学问渊博。“博学”，意在倡导全体师生员工严谨治学、勤奋进取、博览群书、博采众长。作为一所民族高校，各个少数民族的文化在这里得到交融并蓄，“博学”也代表着学校将谨遵多元一体、厚德博学的传统，不断熔铸底蕴丰厚的民族文化和开拓创新的时代精神，培育一种信仰坚定、和谐奋进、多姿多彩的独特的大学文化。 博爱：在中国春秋时代儒家就有“仁者爱人”的论述，唐代的韩愈有“博爱之谓仁”的说法。也是1789年法国大革命的三大口号——“自由、平等、博爱”之一。根据我国语言大师吕淑湘编著的《现代汉语词典》上的解释，“博爱”是对全人类的广泛的爱。博爱是以人为本，包括爱集体、爱祖国、爱人民、爱生命、爱大自然、爱文明进步、爱一切真善美的…
553	Hanjiang Normal University	立德、启智、修能、笃行	MOR0; SCH; PROF; ACT	立德 为树立德行，语出《左传·襄公二十四年》：“太上立德，其次立功，其次立言，虽久不废，此之谓不朽”； 启智 为开发智慧，语出《六韬》：“心以启智，智以启财，财以启众，众以启贤”； 修能 为培养能力，语出《离骚》：“纷吾既有此内美兮，又重之以修能”； 笃行 为努力实践，语出《礼记·中庸》：“明辨之，笃行之”。 综合起来，意思是树立高尚的品德，积极开发智慧，认真培养能力，努力付诸实践。
554	Hubei University of Arts and Science	淡泊明志，宁静致远	WILL; WILL	学校校园三国历史文化景观和自然景观相得益彰，以“淡泊明志，宁静致远”为校训，大力弘扬“淡泊明志、宁静致远、躬耕苦读、鞠躬尽瘁”的“隆中精神”和“敢为人先、乐于奉献”的优良传统，深入推进文明校园、书香校园、科技校园、艺术校园、运动校园建设。“到诸葛亮读书的地方上大学”“像诸葛亮一样读书去”“新一代卧龙出山”等特色语系感召着青年学生求学、探知、成长。
555	Zhongnan University of Economics and Law	博文明理、厚德济世	SCH; MOR1; MOR0; MOR3	知识渊博 缜密思维 识高才优 求真去伪 守身崇德 人格完备 报国为民 服务社会 我校与新疆医科大学存在共同之处：第一，新疆医科大学是由党的第一代领导人毛泽东同志同意创立的，已走过六十周年的办学历程；中南财经政法大学是由党的第二代领导人邓小平同志创立的，明年将要举行七十周年校庆活动。第二，新疆医科大学秉承“悬壶济世”的校训，是从身体上治病救人；中南财经政法大学传承“厚德济世”的光荣传统，是精神境界的“治病救人”；第三，两所学校都是具有红色基因的学校。
556	Wuhan Sports University	公勇诚毅，学思辨行	MOR3; MOR1; MOR1; DIL; SCH; REAS; REAS; ACT	学校秉承“公勇诚毅，学思辨行”校训，坚持“融体育、科技、人文教育为一体，集道德、文化、专业素质于一身”的办学理念，办学70年来，为国家培养输送了15万余名优秀人才。
557	Hubei Institute of Fine Arts	崇德、笃学、敏行、致美	MOR0; SCH; ACT; PROF	崇德：语出《论语·颜渊》即崇尚道德，提高道德修养，提升道德品质。 笃学：语出《论语·泰伯》即心无旁骛，坚持不懈，专心致志学习。 敏行：语出《论语·里仁》即深思远虑，反应敏捷，行事果断。 致美：语出《论语·泰伯》即使美至，发现美，追求美，创造美，实现美。 思想内涵： 为人立德高远 为学思笃志纯 为事精敏干练 为艺求真致美 阐释： 崇德 语出《论语·颜渊》“主忠信，徙义，崇德也”，即崇尚道德，提高道德修养，提升道德品质，升华人生境界。高校立身之本在于立德树人。大学是培养造就人才之熔炉。人才即会做实事，做大事之人。欲做实事者，先做真人；欲做大事者，先立大志；欲立大志者，先立大德。做事先做人，为艺先为德。德，是天地运化之道，是世间做人之本，故“崇德”尊校训之首。 笃学 语出《论语·泰伯》“笃信好学，守死善道”，即心无旁骛，坚持不懈，专心致志学习。笃有两义：一为厚，积累学识，厚积薄发，涵养心悟，情…
558	South-Central Minzu University	笃信好学、自然宽和	MOR1; SCH; INCL	校训是一所学校用简练而概括的文字制定的对全校师生员工具有指导意义的准则，它是一所大学特性的体现，是大学在长期治学过程中形成的特点、精华的概括，它是这所学校的精神所在，是高等学校独特的文化表现形式。是一所学校办学宗旨、育人方向、治校风格的高度凝聚，是学校校园精神和办学特色的集中体现。校训是一种巨大的精神力量，对全体师生员工具有强烈的导向作用、激励作用、凝聚作用和规范作用，是指引学校群体自我教育和共同奋斗的旗帜。适时制定和颁布符合实际、体现特色的校训，对于统一全校师生员工的思想、强化“大学意识”，深化学校改革具有重要的现实意义，而且对认真贯彻党的教育方针，培养德、智、体全面发展的社会主义事业的建设者和接班人，具有十分重要的战略意义。 中南民族大学党委十分重视校园精神的培育、提炼和弘扬工作，并将此作为建设一流民族大学的重要目标之一来抓。在５０多年的办学过程中，始终坚持把党的民族工作规律和高等教…
559	Hubei University of Automotive Technology	求是创新	SCH; INNO	湖北汽车工业学院自创建之日起,就提倡“实事求是”、“创新改革”的学风和校风，并在长期的办学实践中形成了艰苦奋斗自强不息的办学精神。2002年,在学校成立三十周年之际,国家领导人邹家华欣然为学校校训题字“求是创新”。 求是者，探求真理之意；创新者，摒弃旧事物，创造新事物之意。勇于追求真理，探求事物的客观规律，体现了学院师生严谨的治学态度；创新，是民族进步的灵魂，是国家兴旺发达的不竭动力，培养创新型、应用型人才是学院人才培养的规格和目标。“求是创新”就是要求学院师生要培养严谨的学风、探求真理的勇气和开拓创新、勇于实践的精神。
560	Hubei Engineering University	严以治学、诚以立身	SCH; MOR1	湖北工程学院校训为:“严以治学、诚以立身”。字体为魏碑体,校训作者:葛楚英。 高等教育是学生学习进入专门化的阶段,也是学生成长进入成人的阶段。“治学”就是研究学问,对专门化而言;“立身”就是为人,对成人而言。“严以治学”的“严”有两方面的意思，一是严肃，二是严谨，“严”是“创新”的基础，“诚以立身”的“诚”，是为人的一个基本原则。 “严以治学，诚以立身”是对学习与品德修养的要求，是两个方面，但它们又不是各自孤立的，而是有密切的内在联系的。因为治学也有助于立身，同样立身也有助于治学。 “严”与“诚”，内容广博，其意义具有经典性，不但适用于作为学校主体的学生，可以说，它适用于广大师生。 此外，“严”与“诚”言之极约，对于其内涵的理解，完全可以仁者见仁，智者见智。
561	Hubei Polytechnic University	明德、格物、经世、致用	MOR0; SCH; MOR3; ACT	学校高举习近平新时代中国特色社会主义思想伟大旗帜，全面落实立德树人根本任务，确立了“建设特色鲜明的现代化应用型大学”的发展目标。全校师生秉承“明德、格物、经世、致用”的校训，弘扬“艰苦创业、自强不息、敢为人先、开放创新”的理工精神，坚持质量立校、人才强校、学科领校、创新兴校、开放活校、文化美校、依法治校，打造绿色理工、文明理工、数智理工、美丽理工、平安理工、幸福理工，致力于高质量应用型人才培养，担承新时代大学的历史使命，奋力谱写创新发展的新篇章。
562	Hubei University of Science and Technology	弘德、博学、敏行、敢先	MOR0; SCH; ACT; WILL	“弘德”语出《华阳国志》“思弘德化，思弘德教”，强调德行修养和教化，以德立身，以德报国，旨在注重师生的思想道德建设，告诫师生成才必先成人，成人唯有弘德。 “博学”语出《礼记·中庸》“博学之，审问之，慎思之，明辨之，笃行之”，强调为学首先要广泛地猎取，同时具有世界眼光和开放胸襟，旨在引领教师做到学识渊博、造诣精深，在学术思想、学术风格、学术观点上应兼容并包、百花争艳，引领学生打下厚实的功底，全面提升综合素质。 “敏行”语出《论语》“君子欲讷於言而敏於行”，强调理论与实践相结合，旨在要求师生员工敏于思考，善抓机遇，勤于实践，努力做到知行合一。 “敢先”语见《咏梅》（元·杨维桢）“万花敢向雪中出，一树独先天下春”，《赋得方圆随规矩》（清·乾隆）“法着圣人用，敢为天下先”等，是“敢为天下先”、“敢为人先”的凝练，秉承了荆楚先民“筚路蓝缕、以启山林”的开拓精神和“不鸣则已、一鸣惊人”的豪迈气概，强…
563	Hubei University of Medicine	厚德、勤学、求实、创新	MOR0; SCH; ACT; INNO	厚德——语出《周易》：“地势坤，君子以厚德载物”。意为品格高尚的人的胸怀就像大地一样广博厚实，能容纳承载万物； 勤学——勤奋学习，自强不息，奋发向上。厚德勤学，意谓以崇高的道德、博大精深的学识培育学子成才，广大学子勤奋学习，全面成长。这是中华民族传统美德，成就事业者当以此为训。 求实——意为博学求知，努力探索规律，追求真理。 创新——开拓进取并创出新局面、新境界，改革创新是时代精神的核心。求实创新，即办学求学，要从实际出发，注重实效，诚实守信，并注重把握规律，求索真相，锐意改革，开创学校美好未来。
564	Jianghan University	立德、致用、兼容、创新	MOR0; ACT; INCL; INNO	立德：《左传·襄公二十四年》：“大上有立德，其次有立功，其次有立言，虽久不废，此之谓不朽。” 孔颖达 疏：“立德，谓创制垂法，博施济众，圣德立于上代，惠泽被于无穷。”学校崇尚培养学生崇高的理想信念和道德品质，使学生树立高尚品德，成为做人的榜样。 致用：学校办学贴近和服务地方经济社会发展，着重培养具有实践能力的高素质应用型人才。 兼容：《史记·司马相如列传》：“故驰骛乎兼容并包，而勤思乎参天贰地”。“学诣为主、思想自由、兼容并包”也是蔡元培所倡导的教育理念。学校崇尚宽广胸襟以罗致各类学术人才，营造思想解放、百家争鸣的学术氛围。 创新：学校重视学生的素质教育并通过对学生创新精神和创新能力的培养，造就创新型人才。
565	China Three Gorges University	求索	WILL	2001年合并之初，三峡大学在全校师生和社会各界人士中征集校训近百条，经过全校师生、专家学者的反复研讨、论证，学校党委确定“求索”为学校校训，简明扼要，取义高远。 “求索”校训源出于屈原诗篇《离骚》之“路漫漫其修远兮，吾将上下而求索”。作为生于斯长于斯，秉承屈子遗风的三峡大学已将“路漫漫其修远兮，吾将上下而求索”诗句中的“求索”精神融入自己的办学思想之中，将“求索”作为校训，并赋予她“爱国、自强、求真、创新”的内涵。 屈原是中国历史上伟大的诗人，其身上表现出强烈的爱国忧民、顽强执着的人格特征。屈原出生于宜昌秭归，长期活动和流放于荆楚之地，他的血液里浸润着三峡文化中勤奋勇敢、不畏艰险的因子，他的骨子里凝结着楚人艰苦卓绝、自强不息的精神。“求索”是诗人发出的呼号，“求索”校训可以把屈原的人格特征和他所代表的楚人和三峡文化的特质吸纳其中。 “求索”校训是学校主导价值观的集中体现，它从历史走来，…
566	Hubei University of Police	德才兼备,文武双全	MOR0; SCH; SCH; ACT	为进一步推进我院校园文化建设和“三优化”活动，经专家撰写及征求意见并多次修改，我院的“校训”及“校风铭、师风铭、学风铭”（简称“一训三铭”）已于2006年6月9日经院党委会审定通过，并正式发布。 “德才兼备，文武双全”的八字校训，主旨鲜明，言简意赅，通俗易懂，易记易诵，便于传播，既是学院教育培养的目标和途径，也体现学院的性质和特点；“校风铭”、“师风铭”、“学风铭”昭示了学院建设的理想追求和诚挚愿望，也界定了师生员工的行为规范和努力方向。
567	Jingchu University of Technology	崇学尚德，求实创新	SCH; MOR0; ACT; INNO	“崇学尚德”：崇尚学习，崇尚学问，崇尚科学，崇尚学术，注重教学和学科建设，注重校风、教风、学风建设，培育尊师重教、尊重人才、尊重奉献、尊重创造的校园精神；立身向德，人格完备，胸怀广阔，心态平和，尊重他人，善于合作，与人为善，以和为贵，包容和谐；力求“丰富其知识，文明其精神，野蛮其体魄”；树立科学文化与人文融合的现代教育理念。 “求实创新”：说实话，办实事，务实效，求实绩，不务虚名，苦练内功，创造特色，追求卓越。推崇务实作风，提倡求实精神，培养创新意识，尊重客观规律，坚持进步追求，不断攀越新高，力主科学发展、和谐发展、创新发展。
568	Wuhan Conservatory Of Music	立德、自强、崇文、精艺	MOR0; WILL; SCH; PROF	党委书记李端阳在致辞中指出，校训是学校全体师生应当共同遵守的基本行为准则与道德规范，是师生的奋斗目标和追求。 李端阳强调，建校70年、办学90余年，一代代武音人涵养了“立德、自强、崇文、精艺”的校训，在校训的规范和指引下，铸造自己、培育人才。建校70年，是学校办学历史上的重要时间节点。要把校训精神弘扬光大，融汇到各项庆祝活动中，更好地发挥校庆特殊的育人功能。要秉持“人文、学术、共襄、进步”的理念，总结继往、展望开来，通过回顾发展历程、展示发展成就、总结发展经验、创造发展条件、增强发展信心、凝聚发展力量，外树形象、内聚人心，推进学校未来更大的进步。
569	Hubei University Of Economics	厚德博学、经世济民	MOR0; SCH; MOR3	校训是传统文化之积淀、学校历史之荟萃、办学理念之凝练、时代精神之象征、师生行动之方向、人才培养之指针。湖北经济学院以“厚德博学、经世济民”为校训，体现的正是这样的文化传承、精神气质和实践指向。 校训蕴含传统文化精髓 《周易·象传》云：“天行健，君子以自强不息。”“地势坤，君子以厚德载物。”中华民族历来有崇德重德的传统，“厚德”体现了传统文化精髓之所在。校训中的“厚德”寓意为“以德为先”的办学原则和“立德树人”的办学目标，引导师生注重思想道德修养、厚植传统美德，以弘扬中华优秀传统文化、建设现代文明为己任，追求更高的思想道德目标。 《礼记·中庸》云：“博学之，审问之，慎思之，明辨之，笃行之。”中国知识分子自古有追求博学的传统，在博学中融通古今之变，研究天人之际，探讨现实问题。校训中的“博学”寓意为学校重视师生能力培养，培养理论与实践紧密结合、基础扎实、富有创新精神和实践能力的高素质人才。 “…
570	Wuhan Business University	商道惟诚，知行致远	MOR1; SCH; ACT; WILL	新校训为：商道惟诚，知行致远。其力求更好地表达中华优秀传统文化精髓、商业文明核心价值理念、社会契约精神基石、商科教育立德树人的愿景。 新校训和新校徽标志具有继承性、发展性、科学性相统一，传统文化、区域文化、校园文化相统一，人文性、厚重性、传播性相统一的特点。 学校坚持社会主义办学方向，落实立德树人根本任务，坚定地方性、应用型的办学定位，秉承“商道惟诚，知行致远”的校训，践行“明德笃学，求实致用”的办学理念和“创新开放，自强不息”的大学精神，坚持“转型提升、内涵发展、商科特色、开放办学”的发展战略，以建设高水平应用型大学为主线，以现代服务业为面向，以商科专业课程建设为核心，以产教融合为特色，努力为区域经济社会发展培养高素质应用型人才。
571	Hubei University of Education	学高、身正、诚毅、笃行	SCH; MOR1; WILL; ACT	学校将秉承“学高、身正、诚毅、笃行”校训，坚持“正己达人、以生为本”办学理念和“百折不挠、追求卓越”的二师精神，凝心聚力，攻坚克难，坚定不移锚定学校第二次党代会提出的奋斗目标，致力于将学校建设成为一所国家需要、社会认可、人民满意的教师教育特色鲜明的高水平师范大学，为基础教育和区域经济社会发展提供更强大的人才和技术支撑，为教师教育事业发展和湖北建设全国构建新发展格局先行区贡献力量。
572	Xiangtan University	博学笃行，盛德日新	SCH; ACT; MOR0; INNO	所谓校训，原本是学校校长讲话中的关键词语，因为既有底蕴又有实效，所以被一代一代的教师和学子传递下去，时间一长，就成了约定俗成的话语。这就是校训。校训既能用来激励和劝勉教师和学子们，同时也能体现学校的办学原则与目标。 校训是一种无形的力量，对于造就和培养学者和学人有不可估量的重要作用。清华大学的校训“自强不息，厚德载物”，因为非常优秀，且几成清华办学历史的标志性话语，所以一直被今天国内的大学奉为楷模，各个大学纷纷效法以确立自己的校训。 校训之为校训，首先是必须有所依法。我校确定的校训“博学笃行，盛德日新”则所依不止一处。其中“博学笃行”语出《礼记 中庸》，而“盛德日新”则转语《周易》。先贤们在《中庸》中告诫学子们要“博学之，审问之，慎思之，明辨之，笃行之”。其实这是为学的几个层次，或者说是几个递进的阶段。“博学之”意谓为学首先要广泛的猎取，培养充沛而旺盛的好奇心，好奇心丧失了，问学的欲望随…
573	Jishou University	以人名校，以业报国	MOR3	校训是学校办学的高度概括和哲学提炼，是学校风貌的长期而集中的体现和全体师生员工稳定的行为取向，具有模塑、引导、规范和传播作用。吉首大学的校风是：自律、勤勉、和谐、创新。四者的有机结合，集中体现了我校办学宗旨、育人方向、治校风格 和办学特色。吉首大学的校训是：以人名校，以业报国。以人名校：与“以校名人”相对，指通过全校师生员工、所有校友努力奋斗获得声誉和影响来提高学校的名声。 以业报国：吉首大学将自己的命运与民族兴衰国家繁荣紧紧相联。学校以振兴民族、富强国家为己任，她的学生更以回报社会和国家为自己的终极价值追求。
574	Hunan University	实事求是，敢为人先	ACT; WILL	2001年12月19日，湖南大学五届一次教职工暨十一届一次工会会员代表大会审议通过，以“实事求是，敢为人先”为校训，以“博学、睿思、勤勉、致知”为校风。这一校训、校风体现了“千年学府、百年名校”的办学传统特色，对于发展和创造湖南大学的办学特色，提升办学质量和水平，培养拔尖创新人才都具有非常重要的意义。 释义 “实事求是”指立足现实，夯实基础，追求真理，脚踏实地。 “敢为人先”指着眼于未来和长远，敢于竞争、敢于创新，走特色发展的道路，努力实现学校的跨越式发展。 “实事求是，敢为人先”作为一个整体，二者的关系是：“实事求是”是“敢为人先”的前提和基础，也是建设和发展湖南大学的基础。“敢为人先”是“实事求是”的目标指向，也是建设和发展湖南大学的途径和手段。 缘由 （1）“实事求是”，语出《汉书•河间献王传》。1917年，湖南公立工业专门学校（湖南大学前身之一）迁入岳麓书院旧址，校长宾步程将“实…
575	Central South University	经世致用	MOR3; ACT	“经世致用”远承思孟学派的“大学之道”，近取明末清初顾炎武、王夫之诸人之学旨。“经世”即“经国济世”，强调要有理想抱负，志存高远，胸怀天下，求索治世之道；“致用”即“学用结合”，强调积极入世、致力社会民生的实践精神和智慧。把“经世致用”作为校训，一是体现了我校的中国文化尤其是湖湘文化的底蕴和特色，同时与孙中山先生早年为湘雅的题词“学成致用”一脉相承；二是有利于引导中南学子把远大的理想抱负和锲而不舍的努力结合起来，既能志存高远，敢为天下先，又能脚踏实地，从点滴做起。
576	Hunan University of Science and Technology	唯实惟新，至诚致志	ACT; INNO; MOR1; WILL	“唯实惟新”中的“唯”、“惟”相通，是“独、只有”、“为、是”之意。“唯实”指严谨治学，体现了追求真理的科学精神。“惟新”是追求创新之意，体现了与时俱进的时代精神。 “至诚致志”中的“至诚”，指道德修养的最高境界，强调以诚相待，和谐相处。“致志”指聚精会神，含咏孕育，尽心尽力，从而实现确立的志向和目标。 “唯实惟新，至诚致志”倡导严谨治学，坚持与时俱进，崇尚以德为先，强调全力以赴，传承了湖湘文化传统，彰显了现代大学精神，是过去几十年学校办学传统和校园文化的凝炼，更是学校办学理念和精神风貌的体现。 学校的校训为“唯实惟新，至诚致志”。“唯实惟新”中的“唯”、“惟”相通，是“独、只有”、“为、是”之意。“唯”语出《群书治要》，卷三十有“狱官唯实，法吏唯文。”《张说之文集》卷一四有“唯实唯有，若虚若无；再三军国，一二吁谟。”“惟”语出《唐柳先生集》卷六：“渊懿内朗，冲虚外仁；圣有遗言，是究是勤…
577	Changsha University of Science & Technology	博学、力行、守正、拓新	SCH; ACT; MOR1; INNO	校训是学校历史和文化的积淀，是大学精神和灵魂的象征，是学校办学理念的集中体现，是师生员工共同遵守的行为规范。为激励全校师生员工团结奋斗，与时俱进，开拓创新，增强凝聚力，学校在广泛征求意见、反复讨论论证的基础上，确定“博学力行 守正 拓新”为长沙理工大学校训。 希望广大师生员工秉承“博学 力行 守正 拓新”的校训，树立远大理想，不断追求新知，勇于探索真理，加强实践锻炼，力求知行统一，坚持开拓创新，为学校的持续、健康、快速发展贡献自己的力量。 博学，取自《礼记·中庸》“博学之，审问之，慎思之，明辨之，笃行之”，表示崇尚科学，勤奋好学，博采众长，厚积薄发。 力行，取自《礼记·中庸》：“好学近乎知，力行近乎仁，知耻近乎勇”，指向努力从事，身体力行，脚踏实地，知行统一。 守正，取自《汉书·刘向传》“君子独处守正，不桡众枉”，强调恪守正道，坚持真理，秉于公道，清白为人。 拓新，取义《大学》“苟日新，…
578	Hunan Agricultural University	朴诚、奋勉、求实、创新	MOR1; DIL; ACT; INNO	湖南农业大学源起于公元 1903 年的“修业学堂”。在长期的办学历史中，“修业”学校形成了朴诚奋勉、祟朴尚实、习劳耐苦的办学思想和校风，并贯穿于“修业”学校与湖南农业大学办学的历史长河中。 1903年5月，周震麟等与12名从明德学堂退学的青年学生，在长沙城南高家码头租借民房，创办“修业学堂”。“修业”语出《周易·乾》“君子进德修业，欲及时也。”古人认为“进德”与“修业”一脉相连，缺一不可。“修业学堂”正是秉承了“德业双修”这一宗旨，代代相传。 学校创办之时为私办公助，但受政局动荡影响，学校补助费时有中断，1907 年更是完全中断，办学异常艰苦，但师生一体，共克时艰，堂长以下概不支薪，学校校舍简陋，房屋湫隘，天雨水深盈尺，师生乃赤足撑伞上课，甚至学校常无隔夜之粮，有赖师生典衣为炊，时有“叫化修业、贵族明德”之虐言。 但贫穷和虐言不仅没能动摇师生办学求学的决心，反而激发了师生愈穷愈振的斗志和…
579	Central South University of Forestry and Technology	求是求新,树木树人	SCH; INNO; PROF; MOR2	“求是求新，树木树人”，集中体现了中南林精神，体现了学校的办学理念、办学宗旨和根本任务。 “求是”所体现的崇尚科学、追求真理、探索规律的精神，是办好一所大学的精髓和最高境界，是师生员工的神圣职责和光荣使命。“求新”所体现的求索创新精神，是一所大学的活力所在，是学校出人才、出成果、上台阶的重要保证。 “树木”代表了学校要为国家生态环境建设和可持续发展提供有力的智力支持，产学研相结合，服务于林业建设主战场。“树人”代表了学校的中心任务。 “求是求新，树木树人”，既有学校定位、办学特色的凝练和概括，又体现出学校所承载的历史责任的厚重和大气。
580	Hunan University of Chinese Medicine	文明求实、继承创新	MOR1; ACT; INNO	学校以“人本、仁爱、精诚”为理念，以“文明求实、继承创新”为校训，以“医以载道，兼济天下”为办学宗旨，以“质量办学、特色办学、开放办学”为办学思路，以“中医中药为主，多学科协调发展”为学科特色，以“术精仁厚，一专多能”为人才培养目标，努力建设成为“行业一流、国际知名”的中医药特色鲜明的教学研究型大学。
581	Hunan Normal University	仁爱精勤	MOR1; DIL	“仁爱精勤”校训的主要内涵是：倡导师范仁道，追求高尚；倡导爱人以德，追求和谐；倡导研精思覃，追求真理；倡导勤奋踏实，追求卓越。 2006年师大以“仁爱精勤”的新校训替代了原有的“勤勉严谨、求实创新、献身教育、团结奋进”老校训。1939年1月14日，《国师季刊》创刊号发行，学校确立的“仁爱精勤”校训在该校刊上正式发布。“仁爱精勤”自廖世承先生提出来后，历经一代代师大人的长期奋斗中积累形成一种独特的精神气质，成为师大学子认同的价值追求。新时代的湖南师大，选择“仁爱精勤”作为校训，是对国师精神的一种回归。文字由著名书法家颜家龙书写。
582	Hunan Institute of Science and Technology	至善穷理	MOR1; SCH	至：单深究一个“至”字，便是理工人对任何事物的追求，是达到极致的态度。至——到也。谈及“至”，校训中的“至”来源于《大学》三纲领中的“止于至善”。宋人朱熹将《大学》与《论语》、《孟子》、《中庸》合编为“四书”，《大学》被列为“四书”之首。“至”表达了理工人的对学业事业的一种境界的极致追求，代表了超凡、卓越、极致的求学和工作态度。来湖南理工学院，我们共同感受青春之力，拥抱梦想，铸就未来! “至”应包含三个不同层次的境界： 一是超凡学习力 二是卓越工作力 三是极致创造力 善”入人心 “善”字体现的是理工人人格至善、道德至善、思想至善的三层境界。善，德之建也。在理工的每一个角落、每一个瞬间，你都能感受到理工人所展现出的以“善”为先的热忱、亲切、真挚。而“善”既是学校对理工人做人的要求，同时理工人也将“至善”——到达人生最美好、最完善的品质境界作为自身的追求。 穷究事理 “穷”意为极也。指专注于…
583	Xiangnan University	明德、博学、创新、笃行	MOR0; SCH; INNO; ACT	关于征集“湘南学院精神”及校训含义表述语的通知： 为进一步加强学校思想文化建设和内涵建设，凝聚各方智慧和力量，充分发挥先进思想文化的引领作用，进一步增强师生员工的凝聚力，塑造良好的公众形象，为学校的科学发展、快速发展、和谐发展提供精神动力，经研究，我校决定开展征集提炼“湘南精神”及校训含义表述语活动。现将具体事宜通知如下： 一、征集时间 2022年4月20日至2022年6月30日 二、征集内容 1.“湘南学院精神”表述语； 2.校训（明德、博学、创新、笃行）含义表述语。 三、征集要求： 1.学校精神是学校办学的灵魂，是学校文化建设的核心内容，是赋予学校生命力、活力并反映学校历史传统、学校意志、特征面貌的一种精神文化形态，是师生员工的共同理想、共同信念、共同追求、共同意志以及职业理想、行为规范等的综合反映。 2.校训是广大师生共同遵守的基本行为准则与道德规范，它既是学校办学理念、治校精神的…
584	Hengyang Normal University	厚德、博学、砺志、笃行	MOR0; SCH; WILL; ACT	“厚德博学砺志笃行”，是衡阳师范学院的校训，也是衡师人砥砺前行的不懈追求。“厚德”，语出《易•坤》：“君子以厚德载物。”“厚”，优待、推崇、重视；“德”，道德。“厚德”，即推崇、祟尚道德，也可指道德高尚。体现了学校始终坚持以德育为首要地位的教育原则，要教育学生如何做人。“博学”，语出《论语》：“君子博学于文，约之以礼，亦可以弗畔矣。”“博”，丰富，取得、换得。“博学”，学识渊博，知识面广。体现了学校始终坚持以教学为中心，抓好教学质量的根本原则，即要教会学生如何做事。“砺志”，语出清•李渔《慎鸾交•久要》：“待我砺志青云，立身廊庙……”。“砺”，磨砺，磨练。“志”，意志，志向，理想。“砺志”，磨练意志，亦有追求远大志向、理想之意。表现全体师生员工为实现学校宏伟目标的坚定意志、开拓进取的精神，即重视非理性因素在学校教育中的重要作用。“笃行”，语出《中庸》十三章。“笃”，忠实，专心，坚定之意。…
585	Shaoyang University	明德求真，共生超越	MOR0; SCH; INCL; WILL	大学校训是大学文化建设的一个重要组成部分，从理论上来说，大学校训应该通过优美凝练的文字表达深刻的文化内涵，形象地表达出学校的办学指导思想、办学精神风貌。校训是校风、学风的集中概括，是对全校师生具有指导意义的行为准则。校训对激励全校师生弘扬优良传统，增强荣誉感、责任感，不断开拓进取，具有特别重要的意义。 作为办学六十多年的邵阳学院，一批又一批名师在此执掌过教鞭，一茬又一茬学子在此深造成长。六十多年来，它育人数万，声名远扬。如今面对市场经济的大潮，作为一所升格不久的本科院校，更是万众一心，为把邵阳学院建设成省内外同类高校领先的多科性本科院校而不懈努力。为进一步激励莘莘学子弘扬传统，增强师生员工的凝聚力和向心力，学校在广泛征求意见的基础上，将“明德求真，共生超越”作为邵阳学院校训。我们认为，从语言文字层面来说简洁凝练，从思想内容来说，既反映了邵阳学院的历史传统和个性精神，又体现了新世纪大学的理…
586	Huaihua University	怀仁化物、立地仰天	MOR1; WILL	怀仁，心存仁爱、爱国爱校；化物，格物致知、知行统一；立地，脚踏实地、服务基层；仰天，志存高远、敬畏生命。“怀仁化物”侧重于人格修养，“立地仰天”侧重于价值取向。 “怀仁化物、立地仰天”是社会主义核心价值观与怀化学院校情结合的产物，简洁明了、容易记忆，区域特点突出，从字面上理解，人人都懂但又不全懂；从行为上看，人人都为之向往却很难全部做到，它的内涵丰蕴、张力很大，体现了现实目标与长远目标的有机结合，是我校的历史与现实、人才培养的目标与路径、教育改革的实践与理想的哲学思考和文化概括。所以，我们推出“怀仁化物，立地仰天”这八个字，获得了全校师生和校友们的高度认可，成为怀化学院人特有的精神品质，成为怀化学院特别的教育文化标识，成为怀化学院毕业校友自强不息，厚德载物的内在动力，成为怀化学院凝聚人心、干事创业、敢为天下先的思想理论武器。（摘自2015年10月29日校党委书记谭伟平在中央党校全国高校党…
587	Hunan University of Arts and Science	博学弘文、明理求真	SCH; SCH; MOR1; SCH	博学——营造学习氛围、追求渊博学识、提高学术水平 弘文——增强文化素质、培养健全人格、弘扬人文精神 明理——探发展规律、明人事物理、格物以致知 求真——坚持科学精神、坚定科学信仰、实事求是、勇于创新 经过六十六年的发展，学校凝练了“博学弘文、明理求真”的校训，形成了“尚善尚知尚行、爱国爱校爱人”的校风。
588	Hunan University of Science and Engineering	德才兼备、自强不息	MOR0; SCH; WILL	征途漫漫、惟有奋斗！学校坚持以习近平新时代中国特色社会主义思想为指导，牢记为党育人、为国育才的初心使命，全面贯彻党的教育方针，落实立德树人根本任务，秉承“德才兼备、自强不息”的校训精神和“质量立校、人才强校、特色名校、服务兴校、文化荣校、创新活校”的办学理念，正朝着建设特色鲜明的地方性高水平应用型大学目标阔步前行！
589	Hunan University of Humanities, Science and Technology	谋近以致远、养根而俟实	DIL; DIL	二○○六年五月，学校下发通知在全校范围内开展新校训、校风征集活动。三年多以来，广大师生积极投入这一活动，付出了辛劳，充分显示出主人翁精神，殊为可贵。在此，我们对积极参与这一活动的广大师生表示诚挚的谢意。学校领导非常重视校训、校风的征集与审定工作，多次召开会议，对大家提出的各种方案进行集体研究讨论，并反复征询多方意见，最后决定采用由彭逢澍教授提出的方案。这里发表彭教授撰写的校训、校风解读文字。 谋近以致远，养根而俟实 ——湖南人文科技学院新校训解读 彭 逢 澍 湖南人文科技学院的新校训表述为：谋近以致远，养根而俟实。 大学校训的受众是大学师生。大学里的师生是具有高层次文化素养的一批人，他们的特点是勤于思考，而思考人生必然是其思考的重要方面。可以想见，人生历程的发展规律以及人生历程中谋事的策略等等，一旦经由他们深思熟虑而被他们认定和接受，必将成为他们宝贵的思想武器而被用来指导他们的行动，产生…
590	Hunan University Of Technology and Business	至诚至信、为实为新	MOR1; MOR1; ACT; INNO	至诚，出自《中庸》“至诚无息”，大意是通过内心修养，达到一种极忠诚、极真诚的思想境界，从而树立典范、影响他人。至信，出自《庄子》“至信辟金”，大意是最大的诚信无需借助金玉之类的信物。“至诚至信”意指学校师生要将真诚和信誉作为永无止境的追求，砥砺品行、坚守正道、重信践诺、行为世范。 为新，出自《二十四诗品》“如将不尽，与古为新”，指在以往的基础上改革创新。“为实”从“务实”“求实”化用而来，“为”强调有所作为，如“天下事有难易乎？为之，则难者亦易矣；不为，则易者亦难矣。”“为实为新”，意指学校师生要将“干实事、谋创新”作为行为准则和价值取向，既夯实基础、又勇于创新；既实事求是、又敢为人先。
591	University of South China	明德、博学、求是、致远	MOR0; SCH; SCH; WILL	南华校训：明德、博学、求是、致远 办学理念：品质立校、科技兴校、人才强校 南华精神：勤勉务实、甘于奉献、刚健自强、敢为人先 南华校风：求真、求新、尚善、尚美 发展思路：提高质量、彰显特色、改革创新、强化内涵 发展目标：立足湖南，面向全国，服务国防科技、核工业、医疗卫生、环境保护事业和地方经济社会发展，致力于将学校建设成为省内一流、国内知名、具有国际影响、特色鲜明的高水平教学研究型大学。 学校坚持 “品质立校、科技兴校、人才强校”的办学理念，秉承“明德、博学、求是、致远”的校训，弘扬“勤勉务实、甘于奉献、刚健自强、敢为人先”的南华精神，立足湖南，面向全国，服务高等教育事业，为国家和地方经济社会发展做出积极贡献。
592	Changsha University	力学笃行	SCH; ACT	力学笃行”， 内涵丰富。“学”与“行”，具有辩正关系，“学”是“行”的基础，“行”是“学”的归宿。“学”与“行”的统一，是哲学的基本命题，更是学校教育的要求。学校以“学”为主，要学会做人，学会生活，学会独立思考，学会各种知识与本领；“学”的目的是“行”，要德智体美全面发展，发扬科学与民主精神，把所学的一切付诸实践，回报社会，回报祖国与人民，从而实现每个莘莘学子的人生价值。校训还给“学”与“行”，分别加上了状语“力”与“笃”。要“学”得好，必须努力，必须竭尽全力。要“行”有成效，就必须笃实，一步一个脚印，不达目的决不休止。古人说：“用志不分，乃凝如神。”“锲而不舍，金石可镂。”只要学而用力，行而笃实，莘莘学子就一定会成为国家栋梁，学校就一定能够兴旺发达。 “力学笃行” ，突显出长沙学院的办学特色。长沙学院是长沙市属最高学府，而且是以应用型为特色的学府。校训所讲的“力学”，实际上包容了晋升本…
593	Hunan Institute of Engineering	锲而不舍、敢为人先	DIL; WILL	“锲而不舍”，比喻做事有恒心，有毅力，坚持不懈。“锲而不舍”作为一种韧性精神特写，不仅是学校艰难发展历程的反映，也反映了湖工人情系教育、矢志不渝的精神品质。“敢为人先”，深受湖湘文化“力行践履、经世致用、实事求是”精髓的熏染与影响，它不是盲目比较意义上的“敢”或“先”，而是反映了湖工人思变求新、勇于探索的精神状态，蕴涵着湖工人不尚空谈，躬行实践，根据时代变化和校情, 不断探索最能发挥比较优势、彰显自己特色的发展之路的价值追求。
594	Hunan City University	品学兼修,知行统一	MOR1; SCH; ACT	“品学兼修，知行统一” “品学兼修”是由“品学兼优”一词改造而来。“品”指人的品质、品德、品格和节操，德才兼备德力首，德为立身之本； “学”指学业、学习、学问、学力和学术活动等，“学力根深方蒂固”，学为立业之基；“修”即修养，包括修身与修业两个方面，所谓“进益道德，修营功业”，就是个人在思根道德、品行品质和知识技能等方面经过长期鍛炼和修养所达到的一定水平。“兼修”则是引导学生德智体美全面协调发展的一个动态渐进的修养和锻炼过程；湖南城市学院所倡导的“品学兼修”，就是培养青年学生敬业、诚信、严谨、求实的精神。 “知行统一”是辨证唯物主义的“知行统一观。教育家陶行知认为：“行是知之始，知是行之成；思根与行为结合而产生的知识是真知识。”毛泽东指出：“通过实践而发现真理，又通过实践而证实真理和发展真理。从感性认识而能动地发展到理性认识，又从理性认识而能动地指导革命实践，改造主观世界和客观世界。实践…
595	Hunan Institute of Technology	勤学、务实、圆融、卓越	SCH; ACT; INCL; WILL	勤学，是指勤奋学习，精益求精，学无止境。学习是学生的天职，在大学不仅要学到知识，更重要的是要学会“学习”，即拥有正确的学习态度和较强的学习能力。在同一所学校，师从同样的教师，学习效果之所以存在差异，最主要原因就在于学习的态度和能力。而学习能力的获得很大程度上依赖于学习态度。“勤学”，是同学们顺利完成学业，做一名合格大学生的最基本要求。 务实，是指脚踏实地，小事做起，务求实效。务实就是要重实际、说实话、做实事、求实效，决不能好高骛远。万丈高楼，筑于一砖一瓦；浩瀚海洋，汇于一点一滴。一堂课，一道题，一个实验，一次设计，你们的知识和技能，尽在这点滴之中，聚沙成塔，集腋成裘。 “务实”搭建了理想与现实的契合平台，是同学们从事任何工作，实现任何目标的必由之路。 圆融，是指沟通协作，包容他人，善于交流。培养学生的社会化人格是大学教育的内容之一。社会化人格的形成源于正确的交流态度和良好的沟通艺术。正确…
596	Hunan University of Finance and Economics	正德厚生、经世济用	MOR0; MOR3; MOR3; ACT	“正德”是指以立德为核心、树人为根本，强调德行教化。 “厚生”意为厚实民生，注重培育师生的人本、民本情怀。 “经世济用”意指注重实学、实用、实行、实效，着力构建产学研一体化人才培养机制，培养服务社会经济发展需要的应用型财经人才。 “正德厚生，经世济用”不仅是崇德尚用办学思想的传承，也是学校全体师生员工的价值追求；既是学校办学特色和校园文化精神的充分体现，也是学校对办学责任的深刻理解与实践思考。
597	Hunan Police Academy	忠、真、智、勇	MOR3; SCH; SCH; MOR1	校训喻义为: 忠——忠于党、忠于祖国、忠于人民、忠于法律;真——认真、求真、唯真、鉴真; 智——机智、睿智、理智、明智;勇——勇于探索、勇于创新、勇于奉献、勇于牺牲。
598	Hunan University of Technology	厚德博学、和而不同	MOR0; SCH; INCL	“厚德”，出自《易经·坤卦》，“地势坤，君子以厚德载物”（地势舒展，君子取法于地，以深厚的德行来成就事业）。“厚德”即广厚之德，犹如“大德”；大地具有广厚之德，气势厚实和顺，故能载生万物。与此相对应，君子应增厚美德，容载万物。对于我校学生，“厚德”就是要在“爱国守法、明礼诚信、团结友善、勤俭自强、敬业奉献”的基础上，具有高尚的思想品德和良好的职业道德。 “博学”，语出《礼记·中庸》，先贤们在《中庸》中告诫学子们要“博学之，审问之，慎思之，明辨之，笃行之”。其实这是为学的几个层次，或者说是几个递进的阶段。从“博学”到“笃行”，主要是用来勉励莘莘学子的。学子们要在具有广博的知识、较宽厚的专业知识的基础上，不断涉猎相关学科、相关领域的知识。 “和而不同”，语出《论语·子路》：“君子和而不同，小人同而不和。” 从哲学意义上讲，“和”是和谐，是统一，“同”是相同，是一致；“和”是抽象的，内在的；“…
599	Hunan Women's University	懿德睿智、笃行臻美	MOR0; SCH; ACT; WILL	校训释义： 懿德，谓美好的品德，出自《诗经》：“好是懿德”；睿智，谓最深的智识，卓越聪慧，出自《孔子家语·三恕》：“聪明睿智，守之以愚”；笃行，谓笃定践行；臻美，谓达到美好的境界。 校训的主要内涵是：追求美好的品德，最深的智识，笃定践行，达到真、善、美的理想境界。
600	Hunan First Normal University	要做人民的先生，先做人民的学生	PROF	何谓校训？中华书局出版的《辞海》是这样界定的：“学校为训育上之便利，选若干德目制成匾额，悬之校中公见之地，是校训，其目的在使个人随时注意而实践 之。”尽管“德目”指的是德育方面的目标与内容，“训育”主要是对教育对象进行道德教育，但德育所反映的价值取向与追求通常是一所学校对其文化传统、文化内涵、文化精神的抽象和认同，因此，校训是一所学校办学理念、办学精神和办学风格的高度概括，是其文化精神的核心和灵魂。 湖南第一师范学院是全国重点文物保护单位，全国爱国主义教育示范基地，具有光荣的革命传统和优良的教育传统。其校训“要做人民的先生，先做人民的学生”是校友毛泽东同志亲自题写的，具有丰富的文化内涵。主要体现在三个方面： （一）正确处理“尊德性”与“道问学”的辨证关系，引导学生树立“报效祖国，服务人民”的高远志向; （二）积极传承“知行互发”的哲学理念，培养学生“谦逊明礼、实事求是”的作风; （三）大…
601	Hunan University of Medicine	厚德医萃,仰天行健	MOR0; PROF; WILL; ACT	我校的校训为“厚德医萃，仰天行健”，校风为“仁爱、正学、有容、博雅”，教风为“修身至学、启智爱仁”，学风为“博学思辨、守静笃行”。 我校秉承“厚德医萃，仰天行健”的校训，作为医学院校的师生，厚德主要表现在有一颗仁爱之心，医萃是希望我们的教师医学学术水平高超，学生刻苦钻研医术，毕业生医术精湛。仰天就是要求时时不忘前方的目标，坚定心中的理想信念，也是一种朝气蓬勃的精神状态。行健就是要求知行合一，做实干派，遵循天行健，君子以自强不息。 校风是学校师生员工共同具有的思想、行为、作风。我校的校风为“仁爱、正学、有容、博雅”，其中，仁爱指宽仁慈爱，爱护、同情的感情。正学指追求科学与真理。有容指有所包含、宽宏大量、并存共生。博雅指博大雅致，学识渊博、品行端正。 教风是教育教学的特点、作风和风格。体现教师的德、才、学、识、仪的风范。我校的教风为“修身至学、启智爱仁”。修身至学指陶冶身心、涵养德性，追求至…
602	ChangSha Normal University	厚德博学、特立笃行	MOR0; SCH; INNO; ACT	取自《易经》“厚德载物”、《礼记·中庸》“博学之”“笃行之”、《礼记·儒行》“其特立有如此者。”“厚德”即品德高尚，“博学”即学识渊博，“厚德博学”强调品学兼优的人才培养目标；“特立”指独树一帜，亦指徐特立，一语双关，既倡导创新意识，又彰显学校渊源；“笃行”指切实践行，知行合一。“特立笃行”强调在厚德博学的基础上，做到德才兼备、独立自信、经世致用。
603	Sun Yat-sen University	博学、审问、慎思、明辨、笃行	SCH; SCH; REAS; REAS; ACT	1924年11月11日，在作为中山大学前身的国立广东大学成立典礼上，孙中山先生亲笔题写“博学 审问 慎思 明辨 笃行”十字训词，是为中山大学校训之由来。十字训词语出儒家经典《礼•中庸》，要求学子按“至诚”之本性修身，透过学、问、思、辨、行养成君子品格。孙中山先生赋予十字训词新的内涵，强调学子要以振兴中华为己任，学习古今中外各门科学知识；要善于独立思考，明辨道理，学习并发展科学；要立志做大事不可要做大官，为国富强专心做事，为人民、为国家、为社会服务。
604	Jinan University	忠信笃敬	MOR2; ACT	暨南大学校训的出处及含义: 我校校训“忠（zhong）信（xin）笃（du）敬（jing）” 四个字的出处十分古老。《论语·卫灵公》篇记载说：孔子的学生子张问怎样才能使自己到处行得通。孔子回答：“言忠信，行笃敬，虽蛮貊之邦，行矣。言不忠信，行不笃敬，虽州里，行乎哉？”翻译成现代汉语，即是说：“言语忠诚老实，行为敦厚严肃，即使到了别的国家，也行得通。言语欺诈虚伪，行为轻浮狂妄，就是在本乡本土，难道行得通吗？”其内容包括了“言”和“行”两个方面，也就是一个人立身行事的全部内容，是很全面的。 “忠信笃敬”是高度概括的抽象的道德观念，数千年历史文化的积淀，使它们大致具备了以下的意义内涵： 忠：有忠诚、不贰、尽心、无私等意义。 信：有诚实、不欺、道义、真确等意义。 笃：有厚实、真诚、牢固、专一意义。 敬：有恭敬、严肃、尊重、谨慎等意义。 这四个字的意义有交叉，也可以组合使用，更可以与别的字组成新的…
605	Shantou University	有志、有识、有恒、有为	WILL; SCH; WILL; ACT	曾国藩曾说："士人第一要有志，第二要有识，第三要有恒，有志则断不甘为下流，有识则知学问无尽，不敢以一得自足，有恒则断无不成之事"。汕头大学校训训勉广大学子，要有明确的志向和坚强的意志，历练知识和智慧，持之以恒，做有为之人。
606	South China University of Technology	博学慎思、明辨笃行	SCH; REAS; REAS; ACT	华南理工大学校训出自《礼记·中庸》中的“博学之、审问之、慎思之、明辨之、笃行之”，是为“博学慎思，明辨笃行”，体现了知与行的统一、为人与治学的统一。 “博学慎思”，为学要以开放之视野、海纳之胸襟，广采众家学说，不囿于一隅之见，深思各家之短长，以成自家之学说，乃有大容与大成。 “明辨笃行”，为人治学须审问思辨，求真务实，辨清是非真伪，则寻得真知真理；空谈误国，实干兴邦，为学之道更在于躬行践履、学以致用，将知行合一的个人提升和学校发展融入中华民族伟大复兴的历史进程中，方可成为创造美好社会的崇高行动。
607	South China Agricultural University	修德、博学、求实、创新	MOR0; SCH; ACT; INNO	校训是一所学校珍贵的价值遗产和宝贵的精神财富，是一所学校精神的集中表达，是一个学校的灵魂。它代表了一个学校的办学理念，体现了大学文化精神的核心内容，反映了“教风、学风、校风”结合下的治校精神，是人文精神的高度凝练。 积淀在师生血液里的校训，传承百年，历久弥新，激励着莘莘学子弘扬传统，维系血脉，具有极强的凝聚力和向心力。 1999年10月经学校决定，同意“修德、博学、求实、创新”为我校校训 华南农业大学校训 “修德、博学、求实、创新” 八字训词言简意赅，体现了华南农业大学继承传统的治学要求并赋予时代精神的教育理念。 修德，是立国正身之根本。“为政以德”、“以德安邦”、“以德修身”。作为大学生，修德必须先修为人之德，然后才能修好为学之德。 博学，源自《论语·雍也》“君子博学于文，约之以礼”，《礼记·中庸》提到“博学之，审问之，慎思之，明辨之，笃行之”。同时，“博”意味着博大和宽容，“博学多才…
608	Guangdong Ocean University	广学明德、海纳厚为	SCH; MOR0; INCL; ACT	此校训以“广东海洋大学”的简称“广海”两字为句 头。“学”，有学习、学问、学识、学理、学说、学术、学科、 学校等含义，“广学”，要求师生员工博学、博识、博为，即： 广泛学习、广播学问、扩大学校影响力。“德”，指品行、品质、 道德。“明德”，就是认同、践行和彰显美德，体现以德为立校 之本、以德为立人之本。“海纳”，广泛采纳。“厚为”，既有 重视行为、勤动手之意，提倡实干精神，培养“三能”应用型人 才；也有厚实的作为、大有作为之意，通过厚实的作为来提升社 会地位和影响力。 广学明德、海纳厚为，强调品学并重，内外兼顾，有海洋特色
609	Guangzhou Medical University	厚德修身，博学致远	MOR0; MOR1; SCH; WILL	校训是广大师生共同遵守的基本行为准则与道德规范，它既是学校办学理念、治校精神的反映，也是校园文化建设的重要内容，是一所学校教风、学风、校风的集中表现，体现大学精神的核心内容。我们之所以选择 “厚德修身，博学致远” 作为学校的校训，乃是因其有着深远的文化内涵和当下的现实意义。 “厚德修身” 强调的是大学教育中思想道德建设和修养身性的重要性，突出学校对传统美德承传以及对学生的思想道德教育、良好身心培育的重视，倡导师生员工学做人、学做事、学立身、学处世，即以高尚的道德担负起历史使命；以高尚的师德从事教育实践；以高尚的个人操守服务社会。 “博学致远” 强调的是学识修为的重要性，没有渊博的知识，就无法施展自己的抱负，达至人生美好的境界；只有静下心性潜心求学，博思审问，融贯中西，博采众长，才能高瞻远瞩，实现抱负。 “厚德修身，博学致远” 既是对学校师生的行为要求，也是社会对于当今大学的期望，更是学校…
610	Guangdong Medical University	立志立德，求真求精	WILL; MOR0; SCH; DIL	学校恪守“立志立德、求真求精”“艰苦奋斗、自强不息”的精神追求，肩负“兴医强医、守护健康”“立德树人、为党育人”的责任使命，弘扬“严谨、朴实、仁爱、奉献”的校风，实施特色发展核心战略，坚持“以党的领导为根本，以学生发展为中心，以学科建设为核心，以人才强校为要务，以社会服务为己任”的办学理念，立足广东，融入湾区，面向全国，走向世界，致力于建设特色显著、同类前列、国内外知名的高水平医科大学，培养具有坚定理想信念、崇高职业道德、强烈社会责任、深厚人民情怀，富有良好科学精神、创新素质、国际视野，具备坚实理论基础、扎实实践能力、厚实人文素养，服务卫生健康事业和经济社会发展的高素质应用型人才，为国家和广东省的经济社会发展和卫生健康事业进步提供人才保证、智力支持和科技支撑。 意为医者应当志存高远，怀有远大的目标，同时不忘职业道德，医德；追求真理，探索真知，求真务实，实事求是，医学知识与技能要精益求精。
611	Guangzhou University of Chinese Medicine	厚德博学、精诚济世	MOR0; SCH; MOR1; MOR3	八字校训选自传统文化经典、言辞简练、蕴涵丰富、具有时代内涵，显示我校以培养才高德厚的专才为宗旨，勉励广大师生注重自身素养，恪守道德情操，刻苦钻研，执着追求，做一个有益于国家和人民的人。
612	Guangdong Pharmaceutical University	药学中西，医道济世	SCH; PROF; MOR3	“药学中西、医道济世”，两句互文见义，精要概括了学校“以药为主、药医结合、药工融合、多学科协调发展”的办学特色和道术相济、中西并重的学术追求。学尚中西、药医结合，道贵精诚、济世救人，是校训彰显的价值理念，意在激励师生崇道乐学、兼容并蓄、精益求精、救死扶伤，为中华医药谱新章，为人类健康做贡献！
613	South China Normal University	艰苦奋斗、严谨治学、求实创新、为人师表	DIL: SCH; ACT; INNO; PROF	80多年来，学校数易校名，几度迁徙，虽历经沧桑，却弦歌不辍。一代又一代华师人秉承勷勤大学师范学院 “ 研究高深学术，养成社会之专门人才 ” 的优良传统，承传南方大学 “ 忠诚团结，朴实虚心，勤劳勇敢，实事求是 ” 的革命精神，践行 “ 艰苦奋斗、严谨治学、求实创新、为人师表 ” 的校训，筚路蓝缕，薪火相传，共同铸就了学校今天的繁荣与发展。
614	Shaoguan University	立志、崇德、勤学、创新	WILL; MOR0; SCH; INNO	立志崇德意为看重道德，注重品德修养。强调成德为先，旨在突出学校对思想道德的高度重视，体现学校育人为本、德育为先、德才兼备的教育思想。 勤学创新意为学要勤、学要思、学更要创新。只有创新学习目标、创新学习手段与方法、创新评价体系，才能创出新的学习成果。
615	Huizhou University	敦重明辨，求真致用	MOR1; REAS; SCH; ACT	我校校训体现历史、阐发精神，凝聚共识、面向未来。从我校办学实践来看，衡之古今，校之人我，验之成败，校训精神不出以下四端—— 敦重。我校1921年发源于粤秀书院，1946年发展于丰湖书院。清代，惠州知府伊秉绶以“国家尊崇正学”，大规模修建丰湖书院。在院内大堂壁上题隶书“敦重”二字，并款识如下：“人需厚重也，重则威仪整，学问固。所以语云：‘君子不重则不威，学则不固，’是之谓乎。余故于厅内题‘敦重’二字以铭之”。“敦重”二字已成为丰湖书院要素的典型代表，体现了学校办学历史的文脉传承、精神气质及书院特色。 明辨。语出《礼记·中庸》：“博学之，审问之，慎思之，明辨之，笃行之。有弗学，学之弗能，弗措也；有弗问，问之弗知，弗措也；有弗思，思之弗得，弗措也；有弗辨，辨之弗明，弗措也；有弗行，行之弗笃，弗措也。人一能之，己百之，人十能之，己千之。果能此道矣，虽愚必明，虽柔必强。”强调为学之要在广博、勤勉、…
616	Hanshan Normal University	勤教力学，为人师表	PROF; SCH; PROF	学校位于享有“中国瓷都”美誉的国家历史文化名城潮州市，在一百多年的办学历史中，形成了“勤教力学，为人师表”的校训，以及“爱国爱乡爱校的家国情怀、明道传道学道的师道精神、求是求真求正的学人品质、仁爱进取精诚的心灵境界”的韩师人精神特质，凸显“扎根潮州百年深耕师范教育”的办学特色。
617	Lingnan Normal University	崇德、博雅、弘志、信勇	MOR0; SCH; WILL; MOR1	校训是学校规定的对学生有指导意义的语辞，它是一个学校人才培养规格简明而又极具概括性的表述。校训内容的确定既与学校的性质、地位有关，更与校长的办学思想关系密切，它常常是校长办学理念的集中体现。人们从校训中，可以清楚地了解到校长的办学思想和对人才培养的规格与要求，也能在一定程度上把握学校所追求的办学特色。因而许多学校的校长都非常重视校训。 校领导在对我校的办学现状进行深入调查研究的基础上，基于形成我校鲜明的办学特色，提升我校的办学地位，乃至成为师范大学的远大理想，提出“崇德、博雅、弘志、信勇”八个字作为校训，从而既把办学理念转变成了具体的可操作的评价标准，又使广大学生明确了做人与做学问的要求和规范。 师范院校是教师的摇篮，教师最重要的是为人师表，为人师表的核心是教师能以高尚的品德成为学生的楷模。因而校领导在校训中把“崇德”放在首位。对于品德的崇尚是中华民族的优良传统，早在《尚书·武成》篇中就…
618	Zhaoqing University	厚德、明智、博学、力行	MOR0; SCH; SCH; ACT	厚德出自《周易》卦辞：“天行健，君子以自强不息；地势坤，君子以厚德载物”。意指，君子应增厚美德，容载万物，心胸宽广，重公轻私，不以个人得失为主。厚德载物作为中华美德的一种概括，历来是志士仁人崇尚的最高道德境界，德为才之帅，厚德乃学生成才的基础。孔子从“仁学”思想出发，认为“道之以德，齐之以礼，有耻且格。”、“为政以德，譬如北辰，居其所而众星拱之。”（《论语·为政》），强调了德行在人性改造、做人做事及施政治国方面的重要作用。我们将“厚德”放在校训的首位加以强调，在于明确表明，学校把提升学生的道德修养放在首要位置，强调道德修养是人才培养的关键。这不仅秉承了中国文化的优秀传统，也符合了中央“以德治国”的大政方针。 明智出自《墨子·耕柱》：“鬼神孰与圣人明智”。意指超出常人的智能，有非凡的见识，能洞察人间一切，做出符合事实和规律的决策。明智是人才的根本，是衡量人才优劣的主要指标，也是现代人才思维…
619	Jiaying University	勤俭诚信、立己树人	MOR1; MOR1; MOR1; MOR2	“勤俭诚信”即勤劳、俭朴、诚实、守信，这是中华民族的传统美德，也是客家人一贯信奉和遵从的道德准则。“立己树人”强调的是目标和追求。作为一所具有百年师范教育历史的学校，以“勤俭诚信 立己树人”砥砺师生德行，陶冶师生情操，对培养德智体美劳全面发展的合格人才具有重要的作用，也是贯彻党的教育方针，落实立德树人根本任务的需要。
620	Guangzhou Sport University	德厚学博、文精武杰	MOR0; SCH; SCH; ACT	学校坚守为党育人、为国育才的初心使命，秉承“德厚学博、文精武杰”的校训，践行“行胜于言、止于至善、自强不息、拼搏奉献”的广体精神，扎根粤港澳大湾区培养高质量复合型体育专业人才。在长期的办学实践中形成了“扬岭南体育文化、育南国体育人才”的办学特色，成就以体育学科为主体、多学科融合共进的建设新格局，为国家和广东经济社会高质量发展提供强有力的人才支持和智力支撑。
621	Guangzhou Academy of Fine Arts	先学做人，再事丹青	MOR1; PROF	广州美术学院以20世纪中国画艺术大家杨之光先生提出的“先学做人，再事丹青”为校训。 抚今追昔，70年的岁月洗礼，“先学做人，再事丹青”的校训，“守正创新、开放包容、关注现实、服务社会”的办学理念，引领着广美人厚积薄发，行稳致远。
622	Xinghai Conservatory of Music	求真、尚美、崇德、敬业	SCH; PROF; MOR0; PROF	学校坚持人才培养中心地位，秉持质量兴校。始终以培养高素质艺术人才为己任，遵循“求真、尚美、崇德、敬业”的校训，弘扬“星海精神”，培养了大批具有创新精神、实践能力和国际视野的德艺双馨高素质艺术专门人才。
623	Guangdong Polytechnic Normal University	厚德、博学、唯实、求新	MOR0; SCH; ACT; INNO	"厚德博学、唯实求新"是广东职业技术师范学院师生认真深入讨论、充分发扬民主、集思广益而成的。它充分体现我院的办学方向全院师生的精神追求，是引领学院事业健康发展的精神风帆。 "厚德"，意指品德宽厚。语出《易传·坤》："君子以厚德载物"。 "博学"，意指学问丰富，也理解为广博地吸收知识。语出《礼记·中庸》："博学之"。 "唯实"，即所谓"不唯上，不唯书，只唯实"，意指实事求是、执着地追求真理。 "求新"，取"创新是一个民族进步的灵魂"之意，即不断地开拓创新。 这四者是相互联系、有机统一的。 今天，全院师生要以实际行动实践校训精神，以校训激励自己，爱岗敬业，教书育人，刻苦钻研，大胆创新，建设良好师德，营造优良的教风、学风和校风，办出广东职师的特色，为把我院办成全国一流的职业技术师范学院的奋斗。
624	Shenzhen University	自立、自律、自强	WILL; DIL; WILL	“自立”强调“独立”，就是要依靠自己独立面对人生。自立是一个人立身的根本，无论家庭条件和个人能力如何，只有站上这个起跑线，才能真正依靠自己，开始与众不同的人生。 “自律”强调自我约束、自我管理，自己承担行为的责任。自律是一个人内心的道德准则和行为尺度，自律才能在面对各种诱惑时保持良好的心态，做出正确的选择。 “自强”强调自我发展、自我实现。自强是走向成功的信念，从谋生存到谋发展，追随兴趣的脚步，为理想而奋斗。 深圳大学在创校之初，就提出了“自立、自律、自强”的校训和“脚踏实地”的深大精神。“三自”精神，强调个人奋斗和自我实现，而非出身、外在环境与条件的影响，这正是当今青年人最需要的精神动力。
625	Guangdong University of Finance & Economics	厚德、励学、笃行、拓新	MOR0; SCH; ACT; INNO	“厚德”一词出自《周易》：“地势坤，君子以厚德载物。”意思是品德崇高，人格完美，就是要让广财人有崇高的精神追求，有健全的人格，修德而好学，让每个人的天性和与生俱来的能力得到健康的发展，达到我国高等教育理想的育人境界。 “励学”语出宋真宗赵恒的《励学篇》，指发奋学习的一种高尚境界。选用“励学”作为校训词之一，意在勉励师生勤奋求学、刻苦磨砺，注重知识的积累、素质的提升、品格的塑造、精神的超越、心灵的净化、思维的创新。 “笃行”源自《中庸》：“博学之，审问之，慎思之，明辨之，笃行之。”意为努力实践，执着追求，强调师生要重视实践，要在日常生活中朝着既定的目标，忠贞不渝、专心致志、坚持不懈地去努力践履所学，使所学最终付诸行动，真正做到言行一致、知行合一。 “拓新”为现代用语，校训中意为与时俱进，开拓创新，不断进取。 “厚德、励学、笃行、拓新”包含四个不同层面的递进关系。“厚德”是在做人的层面，对师…
626	Guangzhou University	博学笃行，与时俱进	SCH; ACT; INNO	广州大学校训“博学笃行、与时俱进”，其中“博学笃行”一语源自合并组建前的原广州大学校训，原广大校训又继承自民国时期创办的私立广州大学校训。而“与时俱进”一语源于广州大学合并组建前身之一——广州师范学院的校训“亦学亦师，与时俱进”。 “博学笃行”的原文出自儒家经典《中庸》。意思是人要按照自然界“诚”的本性，通过博学、审问、慎思、明辨、笃行等修养过程，将自己变成君子，做事不偏不倚、恰当适中。私立广州大学校长陈炳权对校训是这样解释的：“校训---博学笃行的意义：世界愈文明，科学愈发达，愈发达则分科愈多，而各科之间，均有密切之关系。是以科学之大凡，不通各科，不能专精一科，纵能专精一科，不能触类旁通，以适应社会之需求，极其量不过成一‘书痞’、‘腐儒’耳。故为学必先之以博，贯通各科，然后由博反约，专精一科，方能致用，否则与不学等耳，此学之所以贵乎博也。笃行则要求有三：诚实不伪的态度；纯一不杂的主旨；…
627	Guangzhou Maritime University	勤学善思、厚德求新	SCH; REAS; MOR0; INNO	解读： 勤学善思者，方成大器； 厚德求新者，堪当大任。 勤学，意即勤奋学习，坚持学习，学无止境。语出唐代文学家韩愈《进学解》：“业精于勤，荒于嬉；行成于思，毁于随。”；韩愈的《古今贤文·劝学篇》“书山有路勤为径，学海无涯苦作舟”。 善思，意即善于思考，勤于思考，学以致用。语出《荀子·成相》：“臣谨修，君制变，公察善思论不乱。” 厚德，意即追求崇高的道德修养。语出《周易》：“天行健，君子以自强不息；地势坤，君子以厚德载物。” 求新，意即追求创新突破，与时俱进，敢闯新路。语出《礼记·大学》：“汤之《盘铭》曰：苟日新，日日新，又日新。” “勤学善思”，强调勤学善学、勤思善思、学以致用；“勤学”代表人的精神状态和毅力恒心，“善思”代表人的思维能力和良好习惯，二者为互补关系，“学而不思则罔，思而不学则殆”，勤学善思者，方成大器。 “厚德求新”，强调立德树人和培养创新能力；“厚德”代表人的道德品质和…
628	Guangdong Police College	忠诚勇毅、博雅致用	MOR3; MOR1; MOR1; DIL; SCH; ACT	在70余年的办学实践中，学校始终坚持服务政法公安工作和经济社会发展，充分发挥公安专门人才培养基地和公安智库的作用，构建了具有广东公安特色的教育培训体系。学校以“忠诚勇毅、博雅致用”为校训，以“公正严明、笃学敏行”为校风，以“博文约礼、厚生善导”为教风、以“乐学慎思、允文允武”为学风，形成了以政治建校、警务化管理、校局合作协同育人、实战化教学等鲜明的办学特色。
629	Zhongkai University of Agriculture and Engineering	注重实践，扶助农工	ACT; PROF	校训“注重实践，扶助农工”，既反映了学校的办学宗旨和治学理念，又体现了学校的文化底蕴和精神脉络；既表明了仲恺人的共同行为准则和道德规范，又诠释了仲恺人的一直以来倡导并遵循的价值追求，他希望全体师生要分别依托教学科研、校园文化和社会实践等载体，充分发挥校训在知识育人、文化育人和实践育人中的作用。 “注重实践，扶助农工”校训释义： “注重实践，扶助农工”由学校创办人之一兼首任校长何香凝先生注重实验、扶助农工的办学理念与办学定位发展而来。 注重实践，要求仲恺师生务实笃行，学以致用，服务社会。 扶助农工，要求仲恺师生恪守仁爱，关注民生，立志报国。
630	Wuyi University	好学、多思、求实、创新	SCH; REAS; ACT; INNO	学校坚持践行“好学、多思、求实、创新”的校训，秉承“根植侨乡，服务社会，内外合力，特色发展”的办学理念，积极培养思想品德高尚、基础知识扎实，具有国际化视野、较强实践能力和创新创业能力，适应地方经济社会发展需求的高素质应用型人才。
631	Guangdong University of Finance	明德、敏学、笃行、致远	MOR0; SCH; ACT; WILL	“明德”：明天地之德，敬畏自然，爱护环境；明人类之德，共建家园，和谐共生；明公民之德，爱国、敬业、诚信、友善；明家庭之德，做好儿女、好配偶、好父母 “敏学”：视野开阔，中外兼收；知觉灵敏，博专结合；思维敏锐，深思明辨；行文敏捷，追求创新。 “笃行”：格物致知，知行合一；言出必行，行必有果；坚持不懈，持之以恒；生命不息，奋斗不止。 “致远”：志存高远，胸怀祖国；抱负远大，放眼世界；立足当下，着眼长远；修己安人，止于至善。
632	Guangdong University of Petrochemical Technology	崇德、博学、求实、创新	MOR0; SCH; ACT; INNO	“崇德”，出自《论语·颜渊》：“主忠信，徙义，崇德也。”“崇德”即推崇高尚的品格，意指广大师生须注重思想道德修养，以传承和弘扬中华优秀传统文化为己任，以培育和践行社会主义核心价值观、建设现代文明为要务，追求更高之思想道德目标；将其列于首位，体现了教育之本在于坚持社会主义办学方向，根本任务为“立德树人”。广东石油化工学院应国家石油化工事业发展建设需要而立校、迁校，“因油而生、为油奉献”的办学理念和以“听党召唤、为国奉献；艰苦创业、忠诚担当”为内核的“广油西迁精神”，亦诠释了校训中“崇德”精神传递的价值信念和自觉要求。 “博学”，语出《礼记•中庸》：“博学之，审问之，慎思之，明辨之，笃行之。”《礼记·儒行》亦曰：“儒有博学而不穷，笃行而不倦。”博学”意谓为“学”首先要广泛的猎取，培养充沛而旺盛的好奇心，“博”亦意味着博大和宽容，兼容并包，使为学具有世界眼光和开放的胸襟，真正做到“海纳百川，有…
633	DongGuan University of Technology	学而知不足	SCH	校训为"学而知不足"。式样采用诺贝尔奖获得者、学院名誉院长杨振宁博士于1993年在我院的题词。 "学而知不足"语出《礼记 . 学记》，蕴含学无止境的进取精神、虚怀若谷的学习态度、教学相长的教育教学理念。学生学习、实践、钻研、成才的过程，教师传道、授业、解惑、研究的过程，广义上都是"学"的范畴。学而后知不足，知不足而后自省，而后自强、创新、追求卓越。
634	Guangdong University of Technology	团结、勤奋、求是、创新	MOR2; DIL; SCH; INNO	广东工业大学以“团结、勤奋、求是、创新”为校训。团结，是力量的源泉，广东工业大学师生团结一致，同心同德，为学校改革发展凝聚力量。勤奋，体现广东工业大学师生学习和工作的精神状态，是脚踏实地、积极向上的精神风貌，是追求卓越、追求进步的精神品质。求是，是坚持实事求是，是追求真理的科学态度、科学精神；坚持严谨治学、学以致用、知行合一。创新，是事业的灵魂，是突破、是超越；要解放思想、勇于探索，在继承和发扬求是精神的基础上追求创新和超越。
635	Guangdong University of Foreign Studies	明德尚行、学贯中西	MOR0; ACT; SCH	校训植根于中华民族的优秀传统文化，是一所学校立校精神的凝练表达，也是一所学校教风、学风、校风的集中表现。发掘校训故事、传播校训精神对于传播和滋养社会主义核心价值观有着重要作用。近期，根据中宣部要求和省委宣传部通知，南方日报推出“践行社会主义核心价值观校训故事”专题报道，开展以校训为载体的社会主义核心价值观宣传。8月24日，该报A03版刊发关于我校校训的报道文章《在实践中培养 涉外型“通才”-八字校训不断激励“有德有才有情有义”广外人》，现予以全文转载，以期加深广大师生对学校校训和社会主义核心价值观的理解，并自觉践行于实际行动之中。 在实践中培养 涉外型“通才” 八字校训不断激励“有德有才有情有义”广外人 白云山麓，广东外语外贸大学校园内小河流淌、树木成荫。行政楼前，静然矗立的校训石迎向校门，在广外师生心中烙下深刻的精神印记：明德尚行 学贯中西。 建校近50年来，一代代广外人不断求索、发展…
636	Foshan University	明德博学、自强有为	MOR0; SCH; WILL; ACT	面向未来，学校坚持以习近平新时代中国特色社会主义思想为指导，深入贯彻落实党的二十大精神，秉持“明德博学、自强有为”校训，遵循“质量立校、人才强校、特色兴校”办学理念，坚持立德树人，致力于培养具有家国情怀、进取品格、基础扎实、功夫到家的高水平应用型创新人才，加快建设成为服务地方特色鲜明的高水平应用研究型大学。
637	Southern Medical University	博学笃行，尚德济世	SCH; ACT; MOR0; MOR3	博学：取自宋代张商英《素书》“博学切实，所以广知”。意为广博学识、丰富见闻、开阔胸襟、追求真理。 笃行：取自《礼记·中庸》“博学之，审问之，慎思之，明辩之，笃行之”。意为坚定信念、持之以恒、脚踏实地、身体力行。 尚德：取自《左传·襄公二十四章》“德，国家之基也”。意为诚信为本、德行为先、修身敬业、求真求善。 济世：取自《论语·雍也》“博施于民，而能济众”。意为尊重生命、拯救疾苦、乐于奉献、创新拓取。
638	Guangdong University of Education	进德修业，为人师表	MOR0; PROF; PROF	“进德修业，为人师表”，这一校训是学校的兴校之魂，言简意赅地传递出学校师范教育特色和德才相济、谦虚进取的不懈追求。校训砥砺着学校一代代教师、一代代学子不事功名、踏实勤勉地锤炼自我修养，自觉做到学高为师，身正为范，为心中的一份教育理想奉献出辛勤的时光与汗水。
639	Southern University of Science and Technology	明德求是,日新自强	MOR0; SCH; INNO; WILL	2021年9月3日，南方科技大学在2021年开学典礼上公布校训：明德求是 日新自强。 明德树人、求是治学、日新立校、自强报国，共同构成了南科大作为新型研究型大学的核心精神内涵。“明德求是”是南科人的精神底色，“日新自强”是南科人的实践取向，二者构成认识与实践、思想与行动的有机统一，彰显了个人修为、大学追求与报国担当。 “明德”出自《礼记·大学》“大学之道，在明明德”。中国传统教育以德育为核心，培养崇高的道德理想是人才培养的核心目标之一。作为新时代新大学，南科大坚持立德树人，培养能担当民族复兴大任的，明大德、守公德、严私德的时代新人。“明德”也寓意南科大把师德师风建设作为提升新时代教师素质、办好人民满意教育的首要任务，把师德师风建设融入校训校风传承。“明德”是中国古代对教育、对人才的最有智慧的理解，是中国育人观念的精髓，也是中国文化自信的体现，故放校训第一。 “求是”出自《汉书·河间献王刘…
640	Shenzhen Technology University	唯实求精	ACT; DIL	“唯实求精”是深圳技术大学的校园精神，“唯实”为体，“求精”是用，前者来自中华民族素有的讲求实学之风，后者取自朱熹对《论语》的注解“精益求精”。
641	Guangxi University	勤恳朴诚、厚学致新	DIL; MOR1; SCH; INNO	勤恳朴诚：是广西大学首任校长马君武先生亲撰的校训。按照字面的理解，“勤”是勤奋、认真，“恳”是真挚、恳切。“勤恳”合在一起就是殷勤恳切，唐代柳宗元在《柳浑行状》中说：“词旨切直，意气勤恳”，就是指做事认真不懈。“朴”是朴直朴素、敦厚老实，“诚”是诚信诚实，真心真意。“朴诚”合在一起就是敦厚老实，艰苦朴素，诚信诚实。“勤恳朴诚”就是要求勤勤恳恳做事，实实在在做人，艰苦创业，俭朴生活。其中“诚”是核心，是根本。“诚”是人类社会的最高道德规范，也是中国传统文化的精神内核。诚就是真，其对立面是“欺”，“真”的对立面是“假”。为人朴诚，就是朴实无华，诚心真意，以诚相待。大学既是传授专门知识与技能的场所，更是教人勤恳朴诚、求真求善的精神家园，就教育来说，教人如何做人比传授知识更为重要，正如著名教育家陶行知先生所说：“千教万教，教人求真，千学万学，学做真人。”做学问也要“朴诚”，要有实事求是的科学精神…
642	Guangxi University of Science and Technology	求真近道,明德致新	SCH; MOR1; MOR0; INNO	“求真”：就是“求是”，求真相，求真学，求真理。是用务实的态度追求、探究事物的本质和事物发展的客观规律。作为校训，凸显广西科技大学人实事求是、求真务实的态度和严谨治学、治校的作风。同时，这也符合学校一贯的传统学术精神。 “近道”：出自《大学》“物有本末，事有终始，知所先后，则近道矣。”意思指天地万物皆有本有末,凡事都有开始和终了，如果我们能够探求到物象的本末、事理的终始，明白它们的来龙去脉、前因后果,就能接近或掌握事物的本来面目及其发展规律了。在大学里，求知求学是大学人之根本，求知求学就应当追根溯源，探求本真，求得真知，切不能一知半解，不求甚解。因此，“近道”是学校师生应当提倡和推崇的。 “明德”：出自《大学》“大学之道，在明明德”。“明德”意为明其至德，明其根本，明其人格，是为人处世最高的学问准则，为“大学之道”的纲要。作为校训，彰显学校注重培养学生具有完善人格的教育理念，提倡内圣自明…
643	Guilin University Of Electronic Technology	正德厚学、笃行致新	MOR0; SCH; ACT; INNO	“正德”意为尽人之性，以正人德；尽物之性，以正物德。要求师生加强道德修养，自强不息，在德行诸方面不断进取。 “厚学”意为崇尚学识，学问渊博，与学校教书育人属性相吻合，既指桂电师生的发展目标——成为学识渊博的人，又点明了达到这个目标的方法——通过勤奋学习点滴积累。 “笃行”要求师生重于行、实于行、立于行，在思想与实践上实现知行统一，倡导广大师生员工坚持身体力行，学以致用，始终保持脚踏实地、埋头苦干的作风，并以此做人、做事、做学问。 “致新”就是要与时俱进，不断创新，敢为人先，引领发展。致新是笃行的升华，是博学精思付诸于实践的最高境界。在选择中继承，在继承中创新，在创新中发展，在发展中追求卓越。即发现新知识，追求新境界，创造新事物。
644	Guilin university of technology	厚德笃学、惟实励新	MOR0; SCH; ACT; INNO	厚德，指修大德、行大德，道德深厚、德行高尚，同时也指心胸宽广，不计个人得失，重公轻私、无私奉献。笃学，指勤奋好学、专心治学、孜孜不倦。惟实，即求实、求真务实。励新，指劝勉、激赏和鼓励求新求变、开拓创新、日新月异，含有艰苦奋斗、励志进取、锐意开拓、不断创新的意思。 “厚德笃学”突出了德育为先的思想和求学冶学的目标，意在期望学校师生员工以高尚的道德立身，担当天下重任“倡导师生员工努力学习，博采众长，追求广博的学识和渊博的学问。 “惟实励新”强调了求真务实的作风和开拓创新的精神，意在期望学校师生员工以实事求是的科学精神，不断追求和探索事物发展的规律，解放思想，大胆探索，与时俱进，立异求新，锐意创新，不断前进。
645	Guangxi Medical University	厚德励志、博学弘医	MOR0; WILL; SCH; PROF	厚德，语出《易经》：“天行健，君子以自强不息，地势坤，君子以厚德载物”，“厚德”即广厚之德。“厚”的直接语义是指“深、重、多”、“宽容、厚道、忠厚、宽厚、仁厚”。指的是提高道德修养，具有高尚的道德情操。 励志，指的是为了实现志向激励自己刻苦努力。 博学，语出《礼记·中庸》：“博学之，审问之，慎思之，明辨之，笃行之”和《论语·雍也》：“君子博学于文，约之于礼。”指的是要通过广泛地学习知识，努力做到学识渊博。 弘医，弘即光大发扬，医即医学。弘扬医学，治病救人是医学生的万古不变的职责，医学生更应博学精道，弘扬本业。指的是要把“弘扬医术、弘扬医德”当作人生事业的追求。
646	Youjiang Medical University For Nationalities	大医精诚	PROF; MOR1	“大医精诚”为我校的校训。它取自于唐代医学家孙思邈的名句。孙思邈所倡导的大医之“精”，即技术要精湛；大医之“诚”，即品德要高尚。“大医精诚”作为我校的校训则赋予了新的内涵：所谓“精于医术”（广义也是指“精于业务”），具体内涵是指“医术精湛、人文精通、服务精心”，即要求师生员工努力适应现代医学由生物医学模式向生物—心理—社会医学模式转换的要求，成为我校人才培养目标所要求的“精医术、懂人文、有理想、能创新”的“大医”。所谓“诚于人品”，具体内涵是指“待人诚恳、做人诚信、为人诚实、品德高尚”，努力达到儒家思想所倡导的“君子慎独”的理想道德境界。 简言之，“大医精诚”校训，既是思想境界要求，也是行为规范准则，它激励师生员工努力成为精于医术、诚于人品，德才兼备、德艺双馨，把做人与做事完美结合的人间大医。
647	Guangxi University of Chinese Medicine	弘毅自强、传承创新	MOR1; WILL; INNO	学校重视弘扬与继承中国优秀传统文化与中医药文化，营造中华优秀传统文化、中医药文化特色浓郁的校园文化氛围，建成了系列中医药文化景观，将源远流长的华夏传统与博大精深的中医药文化融为一体，展现出浓郁的中医药文化气息，充分展示了中医药文化的博大精深的独特魅力。 校训征集： 学校坚持社会主义办学方向，坚持立德树人根本任务，为党育人、为国育才，更名大学以来，学校在人才培养、学科建设、科学研究、社会服务、文化传承与创新、对外交流合作等方面取得了显著的成绩，具有鲜明的中医药、民族医药特色。为进一步凝练出反映新时代学校办学特色、办学精神和文化内涵的校训，进一步提升学校的办学思想、发展定位和办学特色，展现学校的办学经验和办学成果，构建具有中医药壮瑶医药特色的高品位校园文化，增强广大师生员工团结奋进的责任感、使命感和凝聚力，不断提升学校的综合办学实力，建设国内知名、区域一流的综合性高水平中医药大学，经学校研究…
648	Guilin Medical University	弘德善医	MOR0; PROF	“弘德善医”体现四层意思： 一是体现现代教育本质和党中央提出的“育人为本，德育为先”的理念和医学院校特点，医为仁术，医德高尚的要求； 二是体现我院广大教师和医务人员积德行善，救死扶伤的善良行为； 三是体现一代又一代桂医学子刻苦学习，追求真理，努力攀登医药科学技术高峰的雄心壮志； 四是体现桂医人立足本职，服务基层，为解除广大人民群众的病痛而默默无闻、无私奉献的高尚精神。
649	Guangxi Normal University	尊师重道、敬业乐群	MOR2; PROF; MOR2	“尊师”，意为尊重教育、尊重老师、尊重知识、尊重人才，要求我们形成尊重知识、尊重人才的风气，养成尊师的品德。 “重道”，意为追求真理，崇尚科学、坚持正义、善德立身，要求我们树立科学精神，以实事求是的态度治教治学，不断创新，追求真善美。 “敬业”，意为热爱专业、笃学求精、勤勉创新、献身事业，要求我们专致学业、忠于职守，有为社会发展而奉献的价值追求和勤恳作风。 “乐群”，意为和谐共处、诚信宽容、团队合作、厚生益众，要求我们善于合作，同舟共济，携手共建和谐校园。
650	Nanning Normal University	德才并育、知行合一	MOR0; SCH; ACT	“德才并育”就是要培育人的美德、培育人的才能，美德和才能要辩证统一；要坚持德育为先、全面发展的教育理念，培养高尚、美好、和谐的人格。 “知行合一”就是要注重知识、注重实践，知识和实践要合而为一；要保持和发扬理论联系实际的优良学风，追求至真、至善、至美的境界。
651	Guangxi Normal University for Nationalities	进德修业、崇学善成	MOR0; PROF; SCH; WILL	办学85年来，学校坚持扎根祖国南疆，凝练了“扎根基层、甘于奉献”的“基石”精神，确立了“进德修业、崇学善成”的校训，凸显出“师范性、民族性、边疆性”办学特色，为地方基础教育和经济社会发展培养了一大批优秀人才，有力促进了区域经济社会及教育事业的发展，为边疆民族地区的经济发展、社会进步和国防巩固作出了积极贡献。 为了继承和发扬学校立足边境、自强不息、无私奉献的光荣传统，激励全体师生员工奋发向上、严谨治学，增强广大师生员工责任感、使命感、凝聚力、向心力，同时为使办学精神具体物化，经校长办公会讨论，决定将“自强不息 和谐至善 尊师重道知行合一”的办学精神的提法调整为“扎根基层、甘于奉献”的基石精神。
652	Hechi University	修德、弘毅、勤业、致远	MOR0; MOR1; PROF; WILL	修德──语出《左传·庄公八年 》：“《 夏书》曰 : ‘皋陶迈种德，德，乃降。’”，直译为：《夏书》说：‘皋陶勉力培育德行，德行具备，别人就会信服。’”。“德者，本也 。”德是首要、是方向，一个人只有“明大德、守公德、严私德 ”，方能堪当大任。当代大学生肩负着民族复兴的历史重任 , 不仅要学有所长，更要修身立德。 弘毅──语出《论语·泰伯 》：“士不可以不弘毅，任重而道远 。” 朱熹注：“弘，宽广也；毅，强忍也。非弘不能胜其重，非毅无以致其远。”谓既有远大的抱负，又有坚强的意志。寓意河池学院师生在工作、学习和生活中目标远大，坚韧不拔。 勤业──语出《尚书 周书 周官 》：功崇惟志，业广惟勤。意为取得伟大的功业，是由于有伟大的志向 ; 完成伟大的功业，在于辛勤不懈地工作。功高由于有志，业大由于勤劳。教师要认真对待自己的职责，不能怠惰忽略；学生要勤学格物，才能得真学问。所以“勤业”也是每一位…
653	Yulin Normal University	厚德博学、知行合一	MOR0; SCH; ACT	守身崇德，为人师表，知识渊博，识高才优，人格完备，言行一致，注重实践，诚实守信，奉献为民，服务基层。 厚德，出自《易传》“天行健，君子以自强不息；地势坤，君子以厚德载物”。其意是阐述才能与德行的关系，意思是苍天高高在上，以强有力不可抗拒的法则运行和影响世界，有才能的人应该不断追求进取，使自己具备超凡的济世本领。大地以其宽广与深厚承载万物，有才能的人应像大地一样以宽广深厚的高尚品德、奉献精神来承载万物，包容万物，滋养万物。 博学，出自《礼记·中庸》“博学之，审问之，慎思之，明辨之，笃行之”。意思是，为学之先，要广泛猎取，厚实知识，然后，有所不明的就要追根问底，问过以后，通过自己的思想活动来仔细分析，考察，这样知识越学越多，道理越辨越明，最后，就要努力践履所学，使所学终有落实。厚德博学，是“博学”承袭“厚德”，是“育人为本，德育为先”的教育观念体现，是一个由自然而及于人生哲学的逻辑链条。 知…
654	Guangxi Arts University	亲爱精诚	MOR2 + MOR1	1938年艺师班学习结束时，同年7月，曾刊印一本同学录，刊印教职员及同学的名单，徐悲鸿先生亲笔题字“亲爱精诚”，表达徐悲鸿先生扶持推动广西艺术教育事业的一片赤诚之心，这也成为广西艺术学院的校训。 “亲爱精诚”,这是徐悲鸿先生亲笔题写的校训。“以爱立校,育人的目标不仅仅传授艺术的技巧,而重要的是传授做人之道”。
655	Guangxi Minzu University	厚德博学、和而不同	MOR0; SCH; INCL	在长期的办学历程中，学校秉承“厚德博学、和而不同”的校训，弘扬“团结共进、传承创新”的校风、“精益求精”的教风、“勤学躬行”的学风，扎根八桂大地办大学，在维护祖国统一、民族团结、边疆稳定、社会和谐中发挥了重要作用。
656	Baise University	志远行敏、德高业精	WILL; ACT; MOR0; PROF	志远：这是对百色学院师生员工精神境界的要求。“志远”语出诸葛亮《诫外甥书》：“志当存高远，慕先贤”。意思是一个人应当有高尚远大的志向，只要有远大的志向，朝着目标前进，就一定能成功。这句话恰是诸葛亮青少年时期的自我写照。由于少年诸葛亮有慕效先贤的高远志向，因此他的治学态度就不同于常人，从年轻时就培养了以经世济民为己任的高尚气质。可见，一个人一生所取得的最高成就，首先决定于他人生奋斗目标的高低。志向是指引人生的奋斗目标、是激励人生的前进动力、是丰富人生的桥梁纽带。我们培养的学生应该确立远大的理想抱负，具有为民族振兴、国家富强和人民富裕而艰苦奋斗的献身精神，具有担负起未来重任的胸襟和才能，具有实事求是、独立思考、勇于创新的科学精神。 行敏：这是对百色学院师生员工工作作风和学习方法的要求。“行敏”语出孔子《论语·里仁》：“君子欲讷于言而敏于行。”“敏”即敏捷和勤奋，“行”等同于我们今天所说的“实…
657	Wuzhou University	明德、博学、求是、创新	MOR0; SCH; SCH; INNO	“明德” 出自《礼记·大学》：“大学之道，在明明德，在亲民，在止于至善。”“明德”，使人的美德得以显明。“明德”，旨在强调大学教育中道德建设的重要性，寓意梧州学院重视广大师生思想道德的培养，弘扬和光大中华民族的传统美德，广大师生员工知荣明耻，在遵守基本行为准则的基础上，追求更高的思想道德目标。 “博学” 出自《论语·子张》：“博学而笃志，切问而近思。”“博学”，指广博地获取知识，寓意梧州学院专业设置全面，要求学生不但本学科的知识要广博精深，还要涉猎和掌握更多其他学科相关的知识，文理兼容，百科兼纳，成为高素质的优秀人才。同时教师也需要不断学习，以适应现代教学的要求，更好地“传道、授业和解惑”。 “求是” 出自“实事求是”一语，最早出现在《前汉书》的《景十三王传》“修学好古，实事求是”。师古有注说，实事求是的意思就是“务得其实，每求真是”。毛泽东改造了的“实事求是”，按毛泽东的解释，“‘实事…
658	Guangxi Science & Technology Normal University	启智育人、博识敦行	SCH; PROF; SCH; ACT	我国第一本教育学专著《学记》认为：教育本质为“化民由学”。“化民”即启智育人，启迪人类智慧。广西科技师范学院自办学以来，承担培养中小学教师的任务，多年来为桂中地区乃至全广西培养了大批合格教师，因此，“启智育人”适合学校办学特色和性质。 “博识敦行”，见于《礼记.曲礼上》：“博闻强识，敦善行而不怠，谓之君子”。“博识”：博学多才，全面发展。“敦”是敦促，勉力的意思，“敦行”就是勉力去做，强调动手的能力、实践的作风和对道德的践履。为学者不光要志存高远，还要身体力行。只有认认真真、实实在在地行动，并在行动中勇于开拓创新，将知和行、理论和实践、认识世界和改造世界统一起来，才能算是对社会有贡献的人。
659	Guangxi University of Finance and Economics	诚以修身,信以立业	MOR1; MOR2	学校注重内涵式发展，秉承“诚以修身、信以立业”之校训，立足广西、辐射东盟，面向基层、服务社会，大力调整优化学科专业结构，提升学校办学核心竞争力，努力建设服务区域经济社会发展的特色鲜明的高水平财经大学。
660	Beibu Gulf University	博观内省，达道知行	SCH; MOR1; SCH; ACT	校训典故： "博观"，广览博察也。典出：《史记•平津侯主父列传》："臣闻明主不恶切谏以博观，忠臣不敢避重诛以直谏。"又唐 韩愈 《祭田横墓文》："余既博观乎天下，曷有庶几乎夫子之所为。"再 清 曾国藩 《孙芝房侍讲刍论序》："著书之多，与 茮云 异，而其博观而慎取则同"。"内省"，内自省察也。典出：《论语•颜渊》："内省不疚，夫何忧何惧？" "达道"，解释：通行不变之道。出处：《礼记.中庸》："和也者，天下之达道也"。 "知行"，识见与践行也。典出：明 王守仁 《传习录》卷上："只説一箇知，已自有行在；只説一箇行，已自有知在。古人所以既説一箇知，又説一箇行者，只爲世間有一種人懵懵懂懂的任意去做，全不解思惟省察也，只是箇冥行妄作，所以必説箇知，方纔行得……某今説箇知行合一，正是對病的藥"。 校训释义： 临浩瀚，立高远，是为博观，博观者，海之胸襟，海之视域也；如"博观"意在向外，则"内省"重…
661	Guilin University Of Aerospace Technology	尚德、博学、慎思、笃行	MOR0; SCH; REAS; ACT	学校坚持“育人为本、学以致用”办学理念，弘扬“艰苦奋斗、自强日新”桂航精神，秉承“尚德、博学、慎思、笃行”桂航校训，致力于建设“区域有鲜明特色、行业有重要影响高水平应用型大学”。
662	Guilin Tourism University	修身、立志、敬业、创新	MOR1; WILL; PROF; INNO	“修身”是指修养身心，努力提高自身的思想道德修养水平。修身，一是修德，二是修智，德才兼备，便是修身的理想结果。“立志”是指设立自己未来方向的志愿。它包含两方面内容：一是树立志向，下定决心；二是坚强独立的意志。“敬业”是指在工作中，严格遵守职业道德的工作态度。“创新”是人类特有的认识能力和实践能力，是人类主观能动性的高级表现形式，是推动民族进步和社会发展的不竭动力。
663	Hezhou University	自强、自立、求知、求真	WILL; WILL; SCH; SCH	心有大我、至诚报国的理想信念 勤学笃行、求是创新的躬耕态度 言为士则、行为世范的道德情操 乐教爱生、甘于奉献的仁爱之心 启智润心、因材施教的育人智慧 胸怀天下、以文化人的弘道追求
664	Guangxi Police College	德才育人、忠勇铸魂	MOR0; SCH; MOR1	“才者，德之资也；德者，才之帅也”无德之统，方向偏逾；无才之辅，德无光大。 忠者，人之信、警之魂也；勇者，人之胆、技之托也！无忠则失之于伪，无勇则失之于怯！ 忠勇铸就警魂！德才书写荣光！是为训！
665	Guangxi Vocational University Of Agriculture	崇德尚学、精技为农	MOR0; SCH; PROF	学校依托中国—东盟中心和北部湾经济区的地理优势，积极响应广西乡村振兴战略，推进校企合作、深化产教融合，坚持以立德树人为根本，以科技兴农为己任，秉承“崇德尚学、精技为农”的校训，坚持“以服务为宗旨，就业为导向，走产学研结合发展道路”，立足广西，面向东盟，服务“一带一路”，突出农校姓农特色，努力将学校办成一所特色鲜明、在区内外和东盟地区有一定影响力的农类高等职业院校，为服务广西地方社会经济发展，服务国家乡村振兴战略，培养更多高素质技术技能人才、能工巧匠、大国工匠。
666	GuangXi Vocational Normal University	忠信修身、知行修业	MOR2; PROF	近年来，学校围绕“地方性、应用型、职师类”办学定位，落实“以本为本、应用为先、职师特色”办学思路，在服务地方产业转型升级和职业教育提质增效上取得显著成效。 面向未来，学校将坚守建校初心、牢记办学使命，紧扣“创新性驱动，特色化建设，内涵式提升，高质量发展”总要求，深化产教融合、校企合作，推进工学结合、知行合一，努力将学校办成特色鲜明的高水平普通本科学校，在全面建设新时代壮美广西新征程中再谱新篇、再续华章。
667	Hainan University	海纳百川、大道致远	INCL; WILL	“海纳百川” “海纳百川”，语出东汉许慎《说文解字》：“海，天池也，以纳百川者。”“纳”，容纳也。“百川”，江河湖泽之统称也。“海纳百川”，言海之渊深，可容纳一切江河湖泽之水，状胸怀、气度之宽广。析言之，凡三层意蕴：其一，昭示雍容大度之量。海大胸怀宽广，博采众长，在专业、学科等领域力倡百花齐放，百家争鸣，不同学术思想、学术风格、学术观点皆能兼容并包，和而不同。其二，昭布招贤纳士之心。海大敬贤礼士，任人唯贤，殷切期盼八方贤才加盟，在育人治学、服务社会等领域，建功立业，共创辉煌。其三，昭告树人育才之愿。海大尊师重道，心系子衿，全力为莘莘学子营造良好的成长成才环境，热忱欢迎天下青年才俊来琼求学问道，指点江山，历练人生，成就栋梁。 “大道致远” “大道”，正道也，语出《礼记·礼运》：“大道之行也，天下为公”。“致远”，实现远大目标，语出《文子·上仁》:“非淡漠无以明德,非宁静无以致远。”“大道致…
668	HainanTropicalOceanUniversity	明德、博学、励志、笃行	MOR0; SCH; WILL; ACT	海南热带海洋学院，主校区位于三亚，五指山还有分校区。这个校训是学校名为琼州学院时的校训，2015年学校改为现在的名字——海南热带海洋学院，校训沿用。 学校秉承“明德、博学、励志、笃行”的校训，坚持立德树人根本任务，坚守为党育人、为国育才使命，以习近平新时代中国特色社会主义思想和党的二十大精神为指引，深入贯彻全国教育大会和新时代全国高等学校本科教育工作会议精神，牢抓教育强国、海洋强国、海南自由贸易港建设三大机遇，全面贯彻落实学校“1236”发展战略，构建高质量人才培养和质量保障体系，全面提高人才培养质量，努力把学校建设成为国内有影响力、国际有知名度、热带特色鲜明的高水平应用型海洋大学，为建设具有世界影响力的中国特色自由贸易港作出新的更大贡献。
669	Hainan Normal University	崇德尚学,求是创新	MOR0; SCH; SCH; INNO	崇德，推崇高尚的道德，优秀的品格，这是为人师的首要条件。 尚学，形成勤勉、好学的风气，营造勤学、博学的氛围。 求是，通过探索研究，揭示事物的本质和规律，从而获得真知。 创新，勇于创造革新，敢为人先，不断开创新的佳绩。 海南师范大学校训的立意是“以德导学，学而有德；为真求学，学而求理；求理为创，创而有理；学中有创，以学带创”。“崇德尚学”体现了培养德智体美劳全面发展的社会主义建设者和接班人的高严标准，也彰显了“学高为师，德高为范”的师范院校特色。“求是创新”则是在“崇德尚学”的基础上，要求海师人展现不断探索规律、追求真理和勇于开拓创新的精神风貌。
670	Hainan Medical University	厚德、严谨、博学、和谐	MOR0; DIL; SCH; INCL	七十五年的办学历程，形成了“厚德、严谨、博学、和谐”校训和“自强不息、团结向上、奋发有为”海医精神；站在海南建设中国特色自由贸易港的新时代改革开放潮头，我们将全面贯彻落实党的教育方针，坚持立德树人；聚焦高质量，融入自贸港，开启建设热带医学特色鲜明的国际化高水平医科大学新征程。 学校弘扬“自强不息、团结向上、奋发有为”精神，秉承“厚德、严谨、博学、和谐”校训，树立培养“红色医生”教育思想，致力于建设具有鲜明热带特色的医科类大学。
671	Qiongtai Normal University	宣德育人、衍道敦行	MOR0; PROF; INNO; ACT	袭继先贤杏坛志，敢为自贸建新功。学校高举习近平新时代中国特色社会主义思想伟大旗帜，深入贯彻落实党的二十大精神，大力弘扬教育家精神，秉承“宣德育人、衍道敦行”的校训精神和“无负海山、敢为琼先”的文化传统，正朝着全面建成国内知名、国际有影响、教师教育特色鲜明的高水平师范院校目标奋勇前进。
672	ChongqingUniversity	耐劳苦、尚俭朴、勤学业、爱国家	DIL; MOR1; SCH; MOR3	它概述了人才成长的前提是吃苦耐劳，成长的关键在于崇尚生活简朴，成才的途径唯有勤于学业，做人的根本则是热爱祖国。 “重大校训曾经过3次改动，如今的校训出自重大1936年实施的《重庆大学训育及管理方法》。”重大校史办主任卢培煜介绍，上世纪二三十年代，西南地区人才匮乏、文化滞后，在成都大学任教的重庆籍教授沈懋德、吴芳吉等人，倡议在重庆创建大学。 1929年，1300多名政商学界人士召开大会，表决通过筹办重庆大学，并发布《重庆大学筹备会宣言》，提出“研究学术，造就人才，佑启乡邦，振导社会”的办学宗旨。建校后，重大便以此作为第一代校训。 “诞生于风雨飘摇的年代，奠定了重大‘耐劳苦、尚俭朴’的品格。”曾担任重大第三任校史办主任的张志芳告诉记者，学校创办之初，正逢抗日民主运动蓬勃发展之际，1936年，学校颁布《重庆大学训育及管理方法》，明确提出“训育学生之标准为：耐劳苦，尚俭朴，勤学业，爱国家……” …
673	Chongqing University of Posts and Telecommunications	修德、博学、求实、创新	MOR0; SCH; ACT; INNO	以立德树人为根本，以内涵发展为主线,以创新驱动为动力，以"双一流"建设为方向，以践行大学责任为使命，以服务地方建设为己任，弘扬"修德、博学、求实、创新"的校训精神，坚持特色办学、创新办学、开放办学、依法办学，培养具有扎实的专业知识、持续的发展能力、执着的行业情怀的高素质创新型人才，努力将学校建设成为特色鲜明、开放式、高水平教学研究型大学。
674	Chongqing Jiaotong University	明德行远、交通天下	MOR0; WILL; PROF; MOR3	“明德行远，交通天下”，除含义厚重、寓义深远、意旨宏阔外，还体现了学校的历史沉淀，又彰显了学校的行业特色，更反映了学校的价值取向和发展路向。 唯明德日新方能行远；唯研学不休、实干不懈、行远不息方能交通天下！ “明德”既是儒家的理想境界，也是社会主义核心价值观的重要内容，又是我校办学育人的一贯目标，更是师生员工治学为人的根本要求。“行远”指交通人的特质和使命，寓意重庆交大人一直在路上，大道行思、研学日新，学无止境、行远不息，而成交通天下！“交通”指我校立足“交通”，却不囿于“交通”，是多学科交融、理实并重、文理会通、工商经法融通、官产学研贯通之多科性大学。又寓我校高扬交通天下之办学理想，秉持达观世界未来之视野，交融古今中外之文明，感通天地社会之灵气，会通文理工商经法之学，启迪人才智慧之光，辉映学术创新之华，以“交通”之名而彰“大学之道”！“天下”指学校立足交通、扎根西部，建设重庆、服务全国…
675	ChongQing Medical University	严谨、求实、勤奋、进取	DIL; ACT; DIL; WILL	学校传承弘扬西迁精神，以“立足重庆、面向西部、服务全国、 走向世界”为战略导向，以“办人民满意的高等医学教育，造就特色鲜明、具有国际视野的医学人才”为办学宗旨，致力于建设“学科优势突出、办学特色鲜明，开放型、国际化的一流医科大学”，为推动医学教育高质量发展，服务国家医疗卫生事业和经济社会发展、维护人类生命健康作贡献。
676	Southwest University	含弘光大,继往开来	MOR1; INNO	“含弘光大，继往开来”的校训，是1928年时任川东师范学校校长的甘绩镛先生所题。川东师范学校源于我校最早的办学渊源川东师范学堂。 “含弘光大”，语出《周易》第二章《坤 》：“坤厚载物，德合无疆。 含弘光大，品物咸亨。”所谓“坤”者，明高僧智旭曰：“顺也，在天为阴，在地为柔，在人 为仁，在性为寂，在修为止……顺则所行无逆……”所谓“含弘光大”，含是无所不包，弘是无所不有，光是无所不著，大是无所不被；“继往开来”，语出宋•朱 熹《朱子全书•周子书》：“所以继往圣，开来学，而大有功于斯世也。”继：继承；开：开辟。继承前人的事业，开辟未来的道路。“含弘光大，继往开来”，即 是“包含弘厚，光著盛大，承前启后，开拓创新”之意。 “含 弘光大，继往开来”作为校训，除含义厚重，寓意深远外，还来源于百年老校的历史沉淀，可谓有源之水，有本之木。而不是那种仁者见仁、智者见智、既可以编选 出来，又容易变更的文字…
677	Chongqing Normal University	厚德笃学、砺志创新	MOR0; SCH; WILL; INNO	厚德笃学 砺志创新厚德： 语出《易经•坤》：“地势坤，君子以厚德载物。”“厚德”意即以德为厚，强调通过加强修养，培养高尚的道德情操。我校把“厚德”放在校训的首位，旨在强调“德育为先”的基本原则，凸显“教人先自教，正人先正己”的为师之道，进一步体现学校重视思想道德建设，引导师生员工追求更高的思想道德目标。笃学 语见《史记•伯夷列传》：“颜渊虽笃学，附骥尾而行益显。”意为专心好学。“笃学”强调以求真务实的态度做学问，体现学校倡导追求真知，加强学术，通过认真学习，丰富理论，扎实基础，提高师能。砺志 意即磨砺意志，砥砺人生。人之于世，必逢各种际遇，只有保持“胜不骄，败不馁”之信念，不断磨练，才能在逆境中奋起，在顺境中笃行，最终到达成功的彼岸。“砺志”是重师人的必修课，也是重师人自强不息、勇于攀登、不断前进的动力。创新 创新是进步的核心推动力，创新是发展的必经之阶，“创新是一个民族的灵魂”。厚重的…
678	Chongqing University of Arts and Sciences	进德修业,博文达理	MOR0; PROF; SCH; SCH	德业兼顾，文理交融，科学与人文并重，自由、博爱与艺术追求协调发展。“进德修业”为过程，“博文达理”是结果，这是学校培育校园文化的依据，更是学校办学、教师治学、学生求学的基本目标与价值理想。 校训出自于三本重要的国文典籍，分别为：《周易》、《论语》、《庄子》。 其中，“进德、修业”语出《周易·干·文言》：“君子进德修业，忠信，所以进德也。修辞立其诚，所以居业也。”其中，“进德、修业”是过程，“博文、达理”是结果。意为：希望同学们，树立正确的价值观、积极的目标，并为之而不懈努力。
679	Chongqing Three Gorges University	厚德、博学、自强、创新	MOR0; SCH; WILL; INNO	学校落实立德树人根本任务，着力增强受教育者的社会责任感、创新精神、实践能力和人文情怀，培养德智体美劳全面发展的社会主义建设者和接班人，使受教育者成为有理想、有追求、有担当、有作为、有品质、有修养的高素质应用型人才。 学校以社会主义核心价值观为引领，秉承“厚德、博学、自强、创新”的校训，着力营造团结协作、求真务实、尚学善思、尚德和谐的校园文化氛围。
680	Yangtze Normal University	学高身正、敬业自强	SCH; MOR1; PROF; WILL	学高身正。“学高”，是指每位师生应具有的学问、知识和技能要成为后学的师表。子曰：“君子博学于文，约之以礼，亦可以弗畔矣夫！”（《论语·雍也》）师者惟有“学高”方可“传道、授业、解惑”。“身正”，是指每位师生应具有的品行，在思想、行动、待人方面要光明正大，成为社会的楷模。子曰：“其身正，不令而行；其身不正，虽令不从”，“苟正其身矣，于从政乎何有？不能正其身，如正人何？”（《论语·子路》）师者惟有“身正”方可立己树人。“学高”和“身正”是教师执业的资本，是其之所以为“师”的根本所系。“学高身正”充分揭示了德与才的内在统一，它不仅是教师从教和做人的基本准则，要求教师在学校里做学生的表率，在社会上也应成为大众的楷模；而且也是学子从学与做人的基本准则，要求学子在学校里既要学业有成，更要为人正直、品行端正。“学高身正”作为我校校训，是学校师范性质的精神阐述，也是实践“以师为师，师从师出”的教师教育理…
681	Sichuan International Studies University	海纳百川，学贯中外	INCL; SCH	学校秉承“团结、勤奋、严谨、求实”的优良校风，弘扬“海纳百川，学贯中外”的校训精神，形成了“国际导向、外语共核、多元发展”的办学特色，开拓出一条“内涵发展，质量为先，中外合作，分类培养”的办学路径。
682	Southwest University of Political Science & Law	博学笃行、厚德重法	SCH; ACT; MOR0; PROF	“博学笃行”取自《礼记•中庸》：“博学之、审问之、慎思之、明辩之、笃行之”。又《论语•子张》：“博学而笃志，切问而近思”。“博学”指广泛学习各种知识，具备广博的知识基础，适应社会的发展；“笃行”指坚持实践，在社会实践中升华理论。“博学笃行”汲取了传统文化典籍的精粹，又展示了丰富的时代精神。 “厚德重法”之“厚德”，取自《易经•象传》：“地势坤，君子以厚德载物。”“重法”取自《荀子•君道》：“法者，治之端也……至道之大形，隆礼重法则国有常。”“厚德重法”不仅体现出学校的办学特色，亦适应了时代的召唤。 “德”“法”要在“博学”的沃土中成长，在“笃行”的过程中成熟，“博学”“笃行”的最终目标，是造就德法兼修的博雅之士、栋梁之材。
683	Sichuan Fine Arts Institute	志于道、游于艺	WILL; PROF	校训、校徽是学校文化传统、办学理念、精神底蕴与人文内涵的体现，彰显了学校的办学特色和精神风貌。经我校专家团队精心设计、反复评审，学校多层面广泛征求意见，相关部门多次论证，校长办公会同意四川美术学院校训、校徽方案，并经学校第五届教代会暨第九届工代会第六次会议通过，校党委常委会审定后，四川美术学院全新校训、校徽于2016年3月30日正式启用。 四川美术学院校训为“志于道 游于艺”。语出孔子《论语-述而》中的“志于道，据于德，依于仁，游于艺。”“道”是中国文化的核心，道与德相连，与仁相依。“志于道”，意为究宇宙之根源、探自然之规律、遵社会之法则。“游于艺”意为游历“艺”与“术”的源点，涉猎“艺”与“术”的门类，探索“艺”与“术”的精神。 “志于道 游于艺”作为校训，体现了四川美术学院开放兼容、浪漫自由的艺术思想，体现了创作与实践并重的教育特色，体现了为社会、经济、文化建设服务，培养具有创新精神…
684	Chongqing University of Science & Technology	厚德、博学、砺志、笃行	MOR0; SCH; WILL; ACT	厚德：崇高的道德情操和理想追求，学校教育，育人为本；德智体美，德育为先。出自于《易经》：“天行健，君子以自强不息；地势坤，君子以厚德载物”。 博学：学识广博，即宽厚的基础理论、扎实的基础知识和娴熟的基本技能；文理兼容，百科兼纳，专业领域游刃有余，高质量、复合型，德智体美全面发展。出自于《礼记•中庸》：“博学之，审问之”和《论语》：“君子博学于文”。 砺志：磨砺意志，志向专一，坚韧不拔、知难而进，迎难而上，要求师生注重陶冶坚强意志和人文精神。出自于苏轼《晁错论》：“古之立大事者，不唯有超世之才，亦必有坚忍不拔之志”。 笃行：实事求是，崇尚实干，忠贞不渝，执着追求，身体力行，学问思辨贵在笃行，要求师生理论联系实际，学以致用。出自于《礼记•中庸》：“慎思之，明辨之，笃行之”。
685	Chongqing University of Technology	明德笃行，自强日新	MOR0; ACT; WILL; INNO	"明德"，语出《大学》（"大学之道，在明明德"），即认同、践行和彰显美德，要求学校以德为立校之本，把德育放在首位，推进以德治校与依法治校的有机结合，"明德"同时也力求学校师生员工以德为立人之本。 "笃行"，语出《礼记·中庸》（"博学之，审问之，慎思之，明辨之，笃行之。"），"笃行"是为学的最后阶段，就是要学有所得，践履所学，做到"知行合一"。 "自强日新"，源于学校校歌， 校歌中提到"沉着毅勇，自强日新，我们是工业的劲军……"。"自强"：自立自强，顽强拼搏，努力向上，永不懈怠；"日新"：勇于开拓，不断创新，追求超越，求新求变，日日更新，每天都有新变化，每天都有新进步。一九四三年，李承干校长在《技工学校校庆日告诸生语》中也提到自然科学为今世立国利民之所必需，吾人既厕身于工艺事业，应知自然科学因日用而日新月异，须时常研讨以免后时，故孜孜好学、以求精进。只有追踪前沿，开拓创新，勇于进取，不断发…
686	Chongqing Technology and Business University	厚德博学、求是创新	MOR0; SCH; SCH; INNO	厚德：厚，增强、厚重。德：道德、品行。“厚德”语出《周易·坤卦》：“地势坤、君子以厚德载物。”意即大地平坦铺展，顺承天道（规律）而动；君子(有德之人)应效法大地，以无比深厚的德行来承担重大的历史责任。郑玄注《周礼·地官·师氏》云：“德行，内外之称，在心为德，施之为行。”故“德”包括思想修养和行为规范两个方面。道德具有历史性和阶级性，一般通用善与恶、正义与非正义、公正与偏私、诚实与虚伪等概念作为评价“德”的标准。校训中的“德”，指在继承中华民族优秀道德传统基础上创新发展的社会主义道德。 博学：博，多、广、宽、厚。学：学问、学识。“博学”指具有广博的学问学识。“博学”语出《论语·雍也》：“君子博学于文，约之以礼。”《礼记·中庸》：“博学之，审问之，慎思之，明辩之，笃行之。”学问学识既包括理论知识，也包括实践技能。高校师生都应学问广博，在专攻某一专业的同时广博地拓展与之相关的其他专业的知识面，…
687	Chongqing Police College	崇法、精业、忠勇、笃行	PROF; PROF; MOR1; ACT	以立德树人为根本任务，坚持公安队伍革命化、正规化、专业化、职业化发展方向，培养政治坚定、学业扎实、作风优良、体魄强健的高素质应用型公安专业人才。 主动服务经济社会发展和公安工作，立足重庆，辐射西部，面向全国。建设具有鲜明公安特色、学科专业比较优势突出的西部一流应用型公安本科院校。人才培养“成人、成警、成专”有特色，科学研究“求实、求是、求新”有影响，社会服务“为公、为民、为警”有成效，文化传承与创新“立德、立言、立行”有氛围，国际交流与合作“共建、共享、共赢”有作为。 韶光流转，岁月如歌。重庆警察学院即将迎来建校75周年，数十载光阴见证着警院的历史变迁，也见证着警院人不变的忠诚使命与责任担当。建校75年来，重庆警察学院始终坚持与国家命运起伏共振，与国家公安教育事业发展紧密相连，秉承“崇法、精业、忠勇、笃行”的校训，服务学生成警成才。
688	Chongqing University of Education	锲而不舍、止于至善	DIL; MOR1	锲而不舍”语出荀子《劝学篇》：锲而不舍，金石可镂。“止于至善”语出《礼记 大学》：大学之道，在明明德，在亲民，在止于至善。 “锲而不舍，止于至善”是学校师生共同历练的个性品质和不懈探索的发展境界。我们以坚毅、持恒和担当的精神专注目标，永不放弃；以认真、严谨和奋进的态度追求卓越，永无止境。
689	Sichuan University	海纳百川，有容乃大	INCL	语出民族英雄林则徐的一副自勉联：“海纳百川，有容乃大；壁立千仞，无欲则刚。”它不仅贴切地概括了今日四川大学的发展历程、办学特色与价值追求，而且由于暗嵌“川大”二字而被不少师生认为是天赐良训。其精神实质不仅体现在“涵乾纳坤，合而能融”，即在思想文化、拔尖人才、学科流派的汇聚中整合办学资源，突出综合优势；而且体现在“登高眺远，再上层楼”，即在人才培养、科学研究和社会服务的创新中不断追求卓越，建设中国一流。
690	Southwest Jiaotong University	精勤求学,敦笃励志,果毅力行,忠恕任事	SCH; WILL; ACT; MOR	1928年，国民政府成立后，交通部重组交通大学，总部在上海，我校当时名为交通大学唐山土木工程学院。1930年5月2日，交通大学公布校训：“精勤求 学，敦笃励志，果毅力行，忠恕任事”。1947年5月15日，在唐山工学院（西南交通大学）建校51周年，唐山复校42周年校庆之际，我校重新确定原交通 大学之校训为唐山工学院之院训。院训曰：“精勤求学，敦笃励志，果毅力行，忠恕任事”。 学校精神“竢实扬华”的由来：1916年春，教育部在北京举行全国高等学校作业成绩展览评比，我校以94分的优异成绩荣获全国第一名。同年12月，教育部为此除给 我校颁发优等奖状外，还由教育总长范源濂特奖我校“竢实扬华”匾额一方，“竢”就是等待的意思；“实”则有三层意思，即果实、坚实、诚实和实事求是； “扬”有飞扬，传播之意；“华”有中华简称、华丽、美丽等意。四个字组合在一起，有等待果实成熟，即寓意培养出人才，同时使人才更加务…
691	University of Electronic Science and Technology of China	求实求真、大气大为	ACT; SCH; WILL; WILL	“求实求真，大气大为”，既是做人的道理，又是做事的准则。“求实”，就是要一切从实际出发，实事求是。“求真”，就是要在科学探索时追求真理，在教书育人时传授真知。“大气”，就是要有敢为人先、追求卓越的气魄和胸怀全局、包容开放的气度。“大为”，就是要在人才培养、科学研究、社会服务、文化传承创新上作出大贡献。
692	SouthWest Petroleum University	明德笃志、博学创新	MOR0; WILL; SCH; INNO	“明德笃志、博学创新”从德、志、知、行四个方面对西南石大人提出了要求，“明德”、“笃志”强调做人，“博学”强调做学问，“创新”强调做事。概而言之，“明德笃志、博学创新”就是要求西南石大人树立远大理想，追求广博学识，不断开拓创新，以脚踏实地的精神和科学严谨的态度，为西南石大学子的成才成功打下基础，为祖国的持续发展作出不懈努力，为中华民族的伟大复兴做出贡献。
693	Chengdu University of Technology	穷究于理、成就于工	SCH; PROF	涵义： 1、“穷究”：深入钻研，追根寻源，不舍追求。见《易•说卦》：“穷理尽性，以至于命”；司马迁：“究天人之际，通古今之变”；另见朱熹：“格物穷理”；见 成语：“穷经皓首”等。 2、“于”：在于、及于、对于、自于等等。 3、“理”：事理、物理，包括道德伦理、人生哲理、科学真理、事物法理以及理想、理性、理论、理念等等。将寻常所说的道德、道理等尽包其中。 4、 “成就”：完成、成功，造就、成全，成材、成器等等。指在正确的理想、理念、理论指导下取得的成绩。 5. “工”：实践、实干，工作、工力，过程、擅长，巧智、巧用，艺术境界等等。如“能工巧匠”、“巧夺天工”、“无意而工而无不工”等等。 八字可直译为：在事理物理处穷究钻研，在实践实干中获得成就。亦即：穷究于事事物物之理，成就于实践实干之工。 优点：1、海涵包容，厚重博大。“穷究于理 成就于工”，将倡导师生员工“厚德、博学、笃行”，“勤奋、求…
694	Southwest University of Science and Technology	厚德、博学、笃行、创新	MOR0; SCH; ACT; INNO	"厚德"源自《周易大传》："天行健，君子以自强不息"；"地势坤，君子以厚德载物。"其意为：天体运行，永无已时，君子法天故应奋斗不止；地势平阔，赞育万物，君子法地，故应兼容并包。其中"自强不息"即永远奋斗，勇敢面对自然和社会的挑战，表现了中华民族所具有的旺盛生命力和拼博抗争精神。"厚德载物"即包容万物，以和为贵、以忍为高，表现了中华民族具有的宽广胸襟和海纳百川的包容精神。中华民族正是以这种精神，在数千年发展中，虽屡遭挫折，历经磨难，仍坚忍不拔，百折不挠，努力进取，生生不息，为人类的发展做出了突出贡献，使自己昂首挺立于世界民族之林。 "博学"源自《论语.雍也》："君子博学于文，约之以礼。""博学"乃华夏古今治学之基础。伟大的思想家教育家孔子尤其强调治学"由博返约"，认为：非"博大"无以至"精深"。按：当今大学教师亦当以"博学"为根基，对学生而言，"博学"更是其适应社会、服务民众、报效祖国的根…
695	Chengdu University of Information Technology	成于大气、信达天下	WILL; MOR3	大学精神 校训、校风及教风、学风是学校办学理念、指导思想、办学特色和精神气质的凝练和概括，是学校校园文化的核心和灵魂。它们“成于大气”既指学校诞生、成长和发展于中国气象事业，更指学校办学、师生做人做事成就于大气精神和成功于大气品质。大气精神主要是指坚定奋斗方向、统观事物大局、把握发展大势的气度；海纳百川、兼收并蓄、有容乃大的气量；自强不息、求真务实、拼搏进取的大无畏的气概；立大志、干大事、创大业的气魄。大气品质主要是指宽广的胸襟、豁达的心境、积极的态度、博大的爱心和厚重的责任。 “信达天下”最基本的是做人的要求，即以诚取信，以良好的信用和信誉达于天下；其次指成信大和成信人在信息时代必须面向世界、面向未来和面向现代化，开拓开放，通达天下。 成长、成才、成功之人大都是志存高远、目光远大、胸怀宽广、豁达大度、诚实守信、包容和谐、气量宏大和奋斗不已的人，是以社会为己任的人，是小我服务于大我的人。…
696	Sichuan University of Science & Engineering	厚德达理、励志勤工	MOR0; SCH; WILL; PROF	厚德达理、励志勤工。学院以德育为本，以教学为中心，培养师生诚信、宽厚的健全人生品格；崇尚科学，孜孜以求，努力追求科学真理；勉励心志、奋发图强，传承“勤奋求实，艰苦奋斗，无私奉献，校兴我荣”的黄岭精神；勤学苦钻，练就精湛技艺，培育具有创新精神和实践能力的高素质人才。一理一工，又暗含学院特色。
697	Xihua University	求是、明德、卓越	SCH; MOR0; WILL	学校坚持“立足四川、面向西部、辐射全国”的服务定位，秉持“求是、明德、卓越”的校训，传承“知难而进、自强不息”的办学精神，秉承“育人为本、学术立校、人才强校、特色兴校、依法治校”的办学理念，主动适应强国建设、治蜀兴川战略需求，全面提高人才培养质量、科学研究水平和服务社会能力，积极拓展国际交流合作，大力推进文化传承创新，办学声誉卓著。
698	Civil Aviation Flight University of China	远举高飞，博学笃行	WILL; SCH; ACT	2006年，中飞院的后来者，在总结、凝练学校50年的精神文化时，通过查阅档案、资料，考证文物、典籍，确立了“远举高飞，博学笃行”的校训，并被天南地北的中飞院人所体认。 中飞院的校训，由学术巨擘任继愈题写，并见于教学科研、文化艺术等育人环境。品读中飞院的校训，人们能从中体味到中飞院的勤谨、严实，能感受到中飞院师生之所以具有“苟利国家生死以，岂因祸福避趋之。”这种品格的源头活水。 “远举高飞”，取自宋·吴潜《八声甘州·和魏鹤山韵》中的“矫首看鸿鹄，远举高飞。”意指飞得又高又远、志向高远、目标宏伟，寓意前途光明而远大。“博学笃行”，引自《礼记·学记》中的“博学而不穷，笃行而不倦。”意指要广泛而深入地学习，对事业要锲而不舍，勇往直前，也包含百折不挠、愈挫愈奋的精神。其总体含义是：要成为有益于国家和人民的人，就必须把个人追求与国家、人民的愿望相结合，志存高远，树远大志向，立宏伟目标。但仅此并不够，…
699	Sichuan Agricultural University	追求真理、造福社会、自强不息	SCH; MOR2; WILL	校训“追求真理 造福社会 自强不息”是四川农大“兴天下之农事”的办学传统，是在百余年的办学历程中凝练而成的师生共同价值理念。校训集科学精神、奉献精神、人文精神为一体，反映了四川农业大学师生深厚的爱国情怀和兴农报国的执着追求，是“爱国敬业、艰苦奋斗、团结拼搏、求实创新”的“川农大精神”的精华，体现了“人才培养是立校之本、科学研究是强校之路、社会服务是兴校之策、文化传承创新是荣校之魂、国际交流合作是活校之方”的办学理念。
700	Xichang University	明德，乐学，求实，至善	MOR0; SCH; ACT; MOR1	“明德”即提高道德修养，明德晓理，方能达到至善至美境界； “乐学”为人生进步的阶梯，乐学静思，方能成才成功； “求实”即弘扬科学家精神，求实创新，方能兴旺昌盛； “至善”即追求完美境界，自强不息，方能益己益人。
701	Southwest Medical University	厚德精业、仁爱济世	MOR0; PROF; MOR1; MOR3	厚德，语出《易经》“君子以厚德载物。”它是中华民族传统美德的一种高度概括，也是历来仁人志士崇尚的最高道德境界。精业，以精益求精的态度对待工作，努力追求精湛技艺。精业是一种态度，也是一种实力。这两个词从思想和行为方面提出了学校所追求的高境界、高标准。 仁爱，源于孔子“仁者爱人”的思想，这是儒家思想的核心，其本质就是把人的爱心无限扩大，达到“泛爱众”。仁爱凝练中国传统文化和医者仁爱品质。济世，作为一种重大社会行为，既包含医者救死扶伤、勇于担当、高尚道德的情怀，又含有报效国家、服务社会、服务人民、无私奉献的社会主义核心价值理念。 这四个词均具备典型的中国元素，也体现出社会主义核心价值观，同时又表现出思与行的辩证关系。
702	Chengdu University of Traditional Chinese Medicine	厚德、博学、精思、笃行	MOR0; SCH; REAS; ACT	博学，出自《中庸》“博学之，审问之，慎思之，明辨之，笃行之。”即要有宽广的学术视野，博采众学之长，学贯中西，博古通今，为传统中医药发展注入新的活力，体现学校将通识教育与宽口径专业教育相结合的教育理念。 厚德，出自《周易•坤卦》“地势坤，君子以厚德载物”，意为崇尚美德，追求至善。即要继承和弘扬中华医药仁术济世传统，培养造就一大批医德高尚、医术精湛的人民健康卫士，体现了学校崇高的精神追求。 精思，意为思虑精细，即要坚持科学精神，追求真理，要培养创造性思维能力，普于发现，勇于创新，体现了学校科学严谨的学术追求。 笃行，意为勇于实践，力行其事。即要坚持理论联系实际的学风，加强专业实践和道德实践，体现了学校勇于实践的精神风貌。这四个方面相互联系，蕴涵了学思并重，德才兼备，知行合一之意。
703	North Sichuan Medical College	敬业、博爱、求是、创新	PROF; MOR3; SCH; INNO	学校坚持“依法治校、民主建校、质量立校、人才兴校、科技强校”办学理念，秉承“敬业、博爱、求是、创新”校训，大力弘扬“艰苦奋斗、自强不息”办学精神，坚持“以人为本，以质量为生命”的办学思想，现已成为一所以医学为主体，医、文、管、法、工、教多学科协调发展的省属高等医学院校。
704	Sichuan Normal University	重德、博学、务实、尚美	MOR0; SCH; ACT; WILL	重德：即重视思想道德。德为人才素质之首，师生以法律和道德为行为标尺。教师要以好的品德和作风锤炼自我，并育出好品德的人才；学生要以德修身，诚信待人，未来才能革故鼎新，传承文明。要在全校培育形成良好的文明道德风尚，增强学校凝聚力和可持续发展能力。 博学：即拥有广博的知识。学校在育人理念上，倡导学生要博古通今，文理兼修；教师作为文明的使者，只有具有广博的知识，才能“传道授业解惑”；学生只有拥有广博的知识，才能成为一个理性的人，成为一个对社会有用的人，才能在未来的激烈竞争中实现自己的人生价值和社会价值。 “重德”、“博学”共同体现了四川师大人“学高为师、身正为范”的教育理念。 务实：即求真务实，开拓创新，认认真真做人，踏踏实实做事。这是四川师大人人生态度和办学精神的写照。“知之为知之，不知为不知，是知也”，要有踏实的治学精神和工作作风，要勤于治学，严谨治学。 尚美：即要有崇尚美的心灵，要有正确的…
705	China West Normal University	勤奋、求实、敬业、创新	DIL; ACT; PROF; INNO	西华师范大学秉承“铸魂励教、陶冶化育”的办学理念和“勤奋、求实、敬业、创新”的校训精神。始终坚持立教报国、育才造士，矢志不渝为民族复兴和地方建设服务；始终坚持铸魂励教、陶冶化育，矢志不渝为基层教育和基础教育服务；始终坚持从严治校、严谨治学、艰苦奋斗、开拓进取，矢志不渝传承和弘扬学校的办学精神；始终坚持同心同德、齐心协力、共谋发展、争创一流，矢志不渝擘画和推进强校事业。
706	Mianyang Teachers’ College	厚德、博学、笃行、弘毅	MOR0; SCH; ACT; MOR1	建校以来，学校积淀形成了“自强不息、艰苦奋斗、务实创新、追求卓越”的精神，“育人为本，服务地方”的办学理念，“厚德、博学、笃行、弘毅”的校训，“弘文励教，止于至善”的教风，“学思并重，知行合一”的学风。 “厚德”，心胸宽广不以个人得失为主，重公轻私，谓之厚德。《周易》中的卦辞：“天行健，君子以自强不息；地势坤，君子以厚德载物”。《河南程氏粹语•论道篇》中说：“一德立而百善从之。” “博学”，《礼记·中庸》：“博学之，审问之，慎思之，明辨之，笃行之。”意为要广泛的学习，成为一个学识渊博的人。 “笃行”，源自《礼记•中庸》：博学之，审问之，慎思之，明辨之，笃行之。《礼记•儒行》：“儒有博学而不穷，笃行而不倦。”笃行是为学的最后阶段，就是既然学有所得，就要努力践履所学，使所学最终有所落实，做到“知行合一”。“笃”有忠贞不渝，踏踏实实，一心一意，坚持不懈之意。只有有明确的目标、坚定的意志的人，才…
707	Neijiang Normal University	明德、博学、笃行、创新	MOR0; SCH; ACT; INNO	它既汲取了中国古代教育思想，有着深厚的教育和文化积淀，又富含时代精神和人文关怀。广大师生在校训的激励下力图求真务实、革故鼎新，奋发向上以报效祖国，为母校争光。 学校于1956年举办高等教育，秉承“明德、博学、笃行、创新”的校训，践行“扎根地方、追求卓越”的办学理念，发扬“团结奋进、负重自强”的内师精神，全面落实立德树人根本任务，全力推进学校高质量发展，目前已发展成为省属同类院校中办学条件优、学科门类齐、综合实力强，融研究生教育（联合培养）、普通本科教育、继续教育、留学生教育于一体的本科院校。
708	Yibin University	求实、求是、开放、创新	ACT; SCH; INNO; INNO	建校40年来，宜宾学院抓住了高等教育快速发展的历史机遇，凝心聚力、开拓进取，实现了从专科到本科的转变，实现了从单一的师范类院校向多学科协调发展的应用型综合性本科院校转变。近年来，宜宾学院党委从学校的实际情况出发，构建了“12345”的办学思想体系，形成了“三风一训一精神”的核心文化。“12345”的办学思想体系，包括“建设全国一流应用型综合大学”的一个愿景，“建设特色鲜明的应用型综合大学”和“培养创新型应用人才”的“两大”目标，“为学生成才奠定基础、为教师成功搭建平台、为社会发展提供支撑”的“三为”使命、“人才建校、教学立校、科研兴校、服务强校”的“四大”战略、“党建为核、制度为先、师生为本、育人为首、学术为魂”的“五大”理念。“三风一训一精神”的核心文化，指的是“求实 求是 开放 创新”的校训，“崇德砺学 知行合一”的校风、“仁爱敬业 修身立人”的教风、“尊师明志 学以致用”的学风，“…
709	Sichuan University of Arts and Science	博文大理，厚德笃行	SCH; SCH; MOR0; ACT	四川文理学院校训“博文大理，厚德笃行”，是学校教育理念与治校精神的集中体现；是学校坚持“大文大理”，既重视人文素养教育、又注重科学精神培育，既倡导文理通融、又致力德行涵养的教育理想表达。
710	Aba Teachers University	德才兼备、智慧永恒	MOR0; SCH; SCH	阿坝师范学院秉承“德才兼备、智慧永恒”的校训，始终坚持“重内涵、强质量、创特色、铸精品”的办学理念，坚持“民族+师范”，发扬“生命不息，奋斗不止”的阿师精神，强化“感恩、奋进、务实、创新”的校风，“爱岗敬业、为人师表、博学善导”的教风，“善学善思、学用结合、求真务实”的学风，建成阿坝民族地区师资培养的摇篮，培养了一大批“融得进、扎得下、知感恩、能奉献”的“永久牌”阿坝民族地区优秀教育师资和其他各类优秀人才。 “德才兼备，智慧永恒”的校训见证了阿师在不同历史背景下经历的数次变革，见证了数代阿师人的光辉历程，激励着无数阿师学子砥砺前行。
711	Leshan Normal University	弘毅自强、笃学践行	MOR1; WILL; SCH; ACT	弘毅:宽宏坚毅，刚强,勇毅。谓抱负远大,意志坚强。 自强:自我勉励,奋发图强。 笃学:语出《论语·泰伯》“子曰：‘笃信好学 ,守死善道。’” 指心无旁骛、专心致志学习。 践行:实践,用实际行动去做某些事。践，履行,实行。
712	Southwestern University of Finance and Economics	严谨、勤俭、求实、开拓	DIL; DIL; ACT; INNO	严谨：《尔雅*释诂》严：敬也。《增韵》谨：毖也，专也，重也。严谨为治学第一要义。为学者在探究、传承、创新文化知识时，须以虔敬之心，博观约取，精益求精，养成严肃认真、谨慎严密的作风。 勤俭：明朝邱濬《大学衍义补》有“国家者亦本有无穷之财，但勤者得之、怠者失之，俭者裕之、奢者耗之。履祥谓《大学》此四语万世理财之大法。”西财历代师生勤俭治校，艰苦奋斗，当传承并永葆勤俭质朴、不尚奢华、理财报国的优良品质。 求实：做学问与做人、做事一样，均要以诚信为本，脚踏实地，立足现实，求真务实。要以理论知识为指导，注重掌握实务知识、实际本领与实战才干，经世致用，强国富民。 开拓：发展离不开前人的奠基和创业，更需要后人的传承与开拓。一个人、一个学校，要坚持自身的特色发展，更要与时俱进，追求卓越，锐意创新，不断赋予其新的生命力。
713	Chengdu Sport University	行健不息、积健为雄	ACT; DIL	阳光下的田径场弯道如虹，与微风中庄严的教学大楼交相辉映，彰显着“体魄与精神并重”的理念，映照着这所学校积淀而成的精神气度——“行健不息、积健为雄”，此八字即为成都体育学院校训。“行健不息”源自《易传·乾象》“天行健，君子以自强不息”，“积健为雄”出自唐代司空图《二十四诗品·雄浑篇》，八个字包含了体育“动”“健”之意蕴，强调积极进取、昂扬向上、积聚力量，成就雄强浑厚之大气，正是这所学校八十载过往的写照，更昭示着它美好的未来。【微信公众号】
714	Sichuan Conservatory of Music	尚美创新	PROF; INNO	立足新时代，学校将坚决贯彻落实党的教育方针，坚持为党育人、为国育才，秉承“办好艺术教育、培养一流人才、促进文艺繁荣”办学理念，恪守“尚美创新”校训，坚持立足现在、弘扬传统、面向未来的办学思路，深化改革创新，推动一流学科建设，努力形成高水平艺术人才培养体系，努力建设“国内一流、国际知名”的高等专业艺术院校。
715	Southwest Minzu University	和合偕习、自信自强	INCL; WILL; WILL	学校秉承“为少数民族和民族地区服务、为国家发展战略服务”的办学宗旨，弘扬以“和合偕习、自信自强”为核心的学校精神，遵循“质量立校、人才兴校、科研强校、特色铸校”的办学理念，坚持走科学发展、内涵发展、特色发展、创新发展之路，建设有特色、高水平大学。 西南民族大学是在毛泽东、周恩来、邓小平等老一辈无产阶级革命家亲自关怀下，新中国最早建立的民族高校之一。学校始终弘扬“和合偕习、自信自强”校训精神，在探索中发展，在追求中前行。
716	Chengdu University	自爱、自修、自尊、自强	MOR1; MOR1; MOR1; WILL	校训出自著名爱国民主人士、教育家张测先生1942年给自己提出的座右铭——“四勉一诫:“人不可以不自爱,不可以不自修,不可以不自尊,不可以不自强,而断不可以自欺。 所谓自爱,即坚守“仁义良心”,出淤泥而不染,达则兼善天下,穷则独兽其身。 所谓自修,即强调君子上达,知行合一:为仁由己,止于至善。 所谓自尊,即柴尚康耻气节,富贵不能淫,威武不能丽,贫贱不能移。 所谓白强,即立足追求真善美,坚韧不拔,百折不挠。
717	Chengdu Technological University	手脑并用、学做合一	ACT; ACT	“手脑并用、学做合一”是由中国近现代爱国主义教育家黄炎培提出的职业教育思想，我校办学百余年历史，也一直坚持“手脑并用、学做合一”的校训。在建校之初的历史特殊时期，它倡导和要求的是职业教育注重实用，注重技能，要理论与实习并行，知识与技能并重，才能培养出社会所需要的人才。在当前我校应用型转型发展时期，“手脑并用、学做合一”仍然适用，即理论和实践相结合共同发展，在学中做，做中学，加强教学实践性促使学生将所学知识转化为能力，达到知识的第二次飞跃。在实际动手的过程中真正的领会知识，解决问题，达到培养应用型工程技术人才的目标。
718	Panzhihua University	明德、砺志、博学、笃行	MOR0; WILL; SCH; ACT	建校近40年以来，学校坚持“立足攀西、面向西部、辐射全国”的服务定位，坚持“立德树人、产教融合、应用为先”的办学理念，秉持“明德、砺志、博学、笃行”的校训，涵育“自律自觉自强、大德大爱大师、阳光健康美丽”的校风教风学风，以学生为本，培养具有“家国情怀、现代文明人格、创新精神和实践能力”的高水平应用型人才，致力建成特色鲜明、优势突出、声誉卓著的应用型一流大学。 “明德”，出自《礼记·大学.》：“大学之道，在明明德，在亲民，在止于至善。” “明”是指光明、清明之义， “德”是指道德（品德）、美德之意，“明德”的意思是指大学的育人之道在于：努力引导师生员工的道德达到理想境界——美德。同时，在《河南程氏粹语·论道篇》中说：“德立而百善从之。”这充分说明在大学教育中“明德”的重要性。 “砺志”中的“砺”是指磨（石）、“志”是指志向和志气等，意思是指大学的育人为本之道重在于：培养锻炼和努力树立师生员…
719	Sichuan Tourism University	读万卷书、行万里路	SCH; ACT	要求师生员工在践行读有字之书和无字之书的校训中增长见识,在学习工作、做人做事中,理论结合实际,学以致用、知行合一,以知促行、以行求知。
720	Sichuan Minzu College	团结、奋进、重道、精业	MOR2; WILL; MOR1; PROF	“团结”：民族共荣，和谐互助。“奋进”：艰苦奋斗，开拓进取。“重道”：重人文、科学之道，重做人、做事之道。“精业”：在学，精于学业；在岗，精于事业。
721	Sichuan Police College	忠诚为民，勤学成才	MOR3; SCH; WILL	学校以“铸造忠诚警魂、培育时代新警、服务公安工作”为 办学宗旨，秉承“政治建警、依法治校、从严治学、特色发展” 的办学理念，坚持公安学历教育、在职民警培训和警务科学研究 协同发展，走职业化应用型内涵式发展道路，立足四川、面向政 法，培养适应现代警务发展需要，具有忠诚政治品格、严明法纪 意识、良好人文素养、扎实专业知识、过硬警务技能和富有创新 精神的公安专业人才，努力建成具有鲜明区域特色的高水平重点 公安院校。
722	Chengdu Medical College	博学博爱、精益求精	SCH; MOR3; DIL	2010年9月19日，院长王亮军以校训的概念和内涵、我校校训“博学博爱，精益求精”的特色为主题，向刚刚结束军训的1700多名大一新生做了入学讲座，他希望新同学将校训作为座右铭，规范自己的大学学习和生活。 王亮军告诉新同学，校训是广大师生共同遵守的基本行为准则与道德规范，是一所学校教风、学风、校风的集中表现，体现大学文化精神的核心内容。学校校训“博学博爱，精益求精”，体现了医学院校的特色、体现了高等医学教育的目标要求、体现了人文素质和科学素质的辩证关系。王亮军指出，高等医学教育的育人目标可概括为“厚基础，高素质，强能力”，“博学博爱，精益求精”的校训是对这育人目标的高度概括。他指出，医学生要学习的知识多，学习要求也高，校训“博学”正与此相应，体现了“厚基础”的要求；医学生必须具有很高的人文素养，“没有爱心、良心、善心，不配做医生”，“博爱”正是医学教育“高素质”要求的概括；医生的职责是“救…
723	Chengdu Normal University	爱、真、笃、为	MOR2; SCH; DIL; ACT	爱(师范教育的内在要求) 爱是教育的起点,没有爱就没有真正的教育。 爱是师范教育的主旋律,让爱在当下和未来的老师之间代代相传是师范教育的重要任务,培养一代又一代有爱心的教师必须成为师范院校的重要使命。 爱的教育内涵：公正、理解、宽容、尊重、信任、爱护、欣赏、赞美。 实现爱的教育途径是：奉献、交往、分享、鼓励、引领。 师范院校不仅要培养有爱心的老师，还要促使学生从教后努力培养富有爱心的学生，教育学生爱自己、爱父母、爱同学、爱朋友、爱党，爱社会主义，爱祖国，爱一切应该爱的人。 真（做人的内在要求） 求真：追求真理是教育的核心价值，教育本身是科学和艺术的紧密结合。 真心待人：真心待人必须恪守善良、热情、守信、负责的原则。 真情做事：首先，真情做事的前提是拥有积极乐观的人生态度。其次，真情做事在教育领域的过程体现是：教育就是服务。再次，真情做事以享受工作，感受快乐，体会幸福为目的。 学做真人：“…
724	Guizhou University	明德至善、博学笃行	MOR0; MOR1; SCH; ACT	贵州大学校训体现了百年贵大追求真理、崇尚完美并且强调博学和实干，为国家民族不遗余力的精神底蕴。它和60余年前国立贵州大学的创始人张廷休先生确立的国立贵州大学校训“坚毅笃实”有着清晰的传承关系，又结合了时代赋予当今贵州大学的新要求，承先启后，继往开来。起点更高，目标更为远。和老校训相比，虽然只增加了四个字，但内涵更加深厚、对传统文化理解更丰富，可谓“和而不同”。 校训中的“明德至善”取自《大学》卷首“大学之道，在明明德，在亲民，在止于至善。” 意思是大学的根本宗旨，首先在于了解和彰显人性固有的内在道德光明，然后必须亲近人民并竭尽全力为之服务，最后则要通过个人修身与社会实践，使社会和人都臻于和谐圆满的至善至美的理想境界。这是做人、做学问的理想途径，也是中国文化人精神追求的最高的目标。“博学笃行”见于《礼记?中庸》的“博学之，审问之，慎思之，明辨之，笃行之”，是儒家先贤做学问的方法论，它与“明…
725	Guizhou Medical University	诚於己、忠于群、敬往思来	MOR1; MOR2; INNO	“诚于己，忠于群，敬往思来”它是一道风景，让我舍弃了“世间奇伟瑰怪非常之观”而痴迷于它独具特色、独具风格、独具气派的惊艳。它是一个故事，让我们追思，回首，感动于它的辛酸苦辣、悲欢离合、破茧成蝶、羽化飞升。 如今，站在时代的新起点，处身于日新月异的新时代，我们去探寻这个美丽且内涵丰富、思辨且亲和人性的校训――“诚于己，忠于群，敬往思来”时，我们会诧异而又从容地说，它就是我们贵州医科大学的校史。 也许你不会这般认为，然而它却这样讲述着它与这个学校的千丝万缕，在七十多年的峥嵘岁月中，它既是校训，也是学校，又是学校师生的风貌，还是医学界的共同精神！ 美哉！我校训，描绘一幅近八十载起伏跌宕的征程；壮哉！我校训，诉说一段近八十年可歌可泣的岁月；善哉！我校训，彰显千年服务人民的光辉！ 它是一个活着的“故事”，一个写不完诉不尽的让人回味无穷而又荡气回肠的故事。把“贵医”描摹成一个栩栩如生的人向我们倾诉。…
726	Zunyi Medical University	明德笃学，求是致用	MOR0; SCH; SCH; ACT	校训是一种无形的力量，对于造就、培养学者和学人有不可估量的重要作用。七十余年来，学校求是的优良传统和严谨的治学精神在一代代师生身上传承延续，并不断发扬光大，历久弥新。正是这种优良的传统和精神，将遵义医科大学深深植根于中国和世界文明的沃土中，全体师生员工顽强拼搏，团结奋进，各项事业蓬勃发展，学校在人才培养、科学研究、医疗服务、对外交流等方面都取得了令人瞩目的成就，为我国高等教育和医疗卫生事业的发展作出了应有的贡献。 “明德”一词语出《礼记•大学》。《大学》开篇提出：“大学之道，在明德，在亲民，在止于至善。”“明”即“使彰明”，“明德”即弘扬光大崇高的道德情操和理想追求，阐明学习的目的第一条就是明晓道理、修养品德，做人要有坚定的信念、高尚的节操。懂得了做人的道理，就能以服务民生为乐事，也就能认真做事、追求真善美。 对学校而言，德为育人之本；对学子而言，德为成人之本。治校之明德，既要法治，更要…
727	Guizhou University of Traditional Chinese Medicine	厚德、明志、笃学、力行	MOR0; WILL; SCH; ACT	厚德：意为增厚美德，追求至善。出自《易经·坤卦》“天行健，君子以自强不息；地势坤，君子以厚德载物”。“厚德”是中华民族的文化精神和优良传统。以加强理想信念教育为核心，以爱国主义教育为重点，以思想道德建设为基础，坚持“育人为本、德育为先、立德树人”，既是祖国医学教育几千年文化传承的核心价值观念，也是培养德智体美全面发展的社会主义合格建设者和可靠接班人的重要内容，对我校构建社会主义和谐校园具有积极的意义。 明志：意为坚定信念，明确志向。出自诸葛亮《诫子书》：“非澹泊无以明志”。“明志”是在自我认知和个人理想的基础上，结合社会的实际和时代的脉搏，选择专业发展和职业发展的方向，并付诸努力。中医院校师生要巩固专业思想，坚定学习、继承、弘扬中医的理想信念，首先要树立为人民群众身心健康服务、为中医药事业发展奋斗的远大志向。《劝学》：“非学无以广才，非志无以成学”，充分说明了坚定理想信念对求学治学的巨大…
728	Guizhou Normal University	慎思笃行、博学致新	REAS; ACT; SCH; INNO	《礼记·中庸》十九章有“博学之，审问之，慎思之，明辩之，笃行之”句。校训取其精要，强调：深入、全面地思考，坚持不懈地实践；广泛、宽厚地汲取，不断追求升华和创新。 【大学精神】爱国 奉献 敬业 自强 “大学精神”是指一所大学在长期的发展过程中所形成的约束、引领大学行为的核心价值体系，以及体现这种价值体系的独特气质。或者说：大学精神是体现大学的智慧、气度、品格、信念、风范、操守等的核心文化体系。大学精神居于大学办学思想观念体系的“核心”和“顶层”，是大学的核心价值和精神支柱，它具有独特性、导向性、约束性和群体认同性，在大学的发展中发挥着凝聚、激励、导向、保障和熏陶等重要功能。对大学的思想、观念、制度、机制、行为等，具有全面统辖的作用和意义。 在千百年来大学演进的过程中，大学精神的内涵不断明晰、不断丰富、不断拓展。现代大学精神的内涵主要包括：人文精神、科学精神、独立精神和开放精神。 贵州师范大…
729	Zunyi Normal University	厚德树人、笃学致用	MOR0; SCH; SCH; ACT	“厚德树人”内含“育人为本、德育为先”观念，体现了社会主义办学方向，突出学院“师范”特点，所树之人是未来的“灵魂工程师”，即所树之人是未来树人之人。 “笃学致用”体现学院以教学为中心的宗旨，要求学生认认真真、踏踏实实地学习，以此建立良好的校风。内含学院面向基层、服务社会的定位和培养“留得住、下得去、用得上”的具有奉献精神、创新意识和实践能力的高素质应用型人才的培养目标。
730	Tongren University	明德、致用	MOR0; ACT	“ 明德 致用”作为我校全体师生员工的行为准则和奋斗目标,突出了我校人才培养方向,概括了我校的办学理念,反映了师生的共同愿望。 明德： 铜仁学院的前身可追溯至1920年创办的明德中学，“明德”体现了我校的办学历史渊源。 “明德”语出《礼记·大学》“大学之道，在明明德”，即大的学问，在于弘扬大的德行。德育为教育之灵魂，“明德”二字强调德育为先，以德立学，以德立身，以德立行。凸显知识之道，重在人文，为人之道，重在人品。我校秉承“明德”精髓，倡导“先做人、再做事”的德才兼备的人才培养理念，注重引导师生员工完善人格，修己立人，把“明德”作为一种崇高的道德追求。 致用： 致用是一种重要的治学态度，强调了我校师生要一切从实际出发，理论联系实际，脚踏实地，注重实效，注重运用，学用结合。 我校作为地方性院校，须把服务地方经济社会发展作为重要使命，积极优化学科结构、调整专业布局，努力使我校成为地方的人才培…
731	Minzu Normal University of Xingyi	勤学、尚美、求实、创新	SCH; WILL; ACT; INNO	背景：2000年，我院（当时为黔西南民族师范高等专科学校）为加强校园文化建设，发挥思想政治教育工作环境育人作用，调动师生员工关心和参与精神文明建设系统工程建设的积极性和主动性，特制定了《黔西南民族师专精神文明建设系统工程实施方案》，将校训与学校精神、校歌一同作为精神文明建设系统的核心，在全体师生中广泛征求意见；成立了黔西南民族师专精神文明建设领导小组，专门负责校训、校歌、学校精神的征集工作，并通过宣传栏、广播等多种形式面向全院征集。经过一个多月的征集，最后遴选出“勤学 尚美 求实 创新”这一校训。2009年学院升本以后，经学院领导和教职员工代表共同研究，决定继续沿用这一校训。 释义：兴义民族师范学院以 “勤学、尚美、求实、创新”为校训，这是在办学过程中办学思想、教育理念等方面的积淀和高度概括。 “勤学”，《论语》曰：“敏而好学，不耻下问”，即重视“智育”，倡导刻苦学习，勤于思考、比学赶帮…
732	Anshun University	安道乐学，顺理笃行	MOR1; SCH; SCH; ACT	1、安道乐学。（1）安道，取自“安贫乐道”一词。在《论语》中，孔子多次将他的弟子颜回视作“安贫乐道”的典型。安道，即人可将心安放在“道”上，因道而安，坦然任道。（2）乐学，语出《论语·雍也篇》：“知之者不如好之者，好之者不如乐之者。”《论语·学而篇》有论“好学”言：“君子食无求饱，居无求安，敏于事而慎于言，就有道而正焉，可谓好学也已。”好学已是“有道”，乐学比好学更能“有道”。（3）“安道”和“乐学”结合，为“道问学”。朱熹在《中庸章句集注》对“道问学”的解释：“道问学，所以致知而尽乎道体之细也。”学而后才能明道至道，致广大而尽精微，进而心可安，理可得。 2、顺理笃行。（1）顺理，即遵循道理，出自《管子·君臣上》:“是故别交正分之谓理，顺理而不失之谓道。”引申为遵循客观规律，实事求是，顺应时代发展。（2）笃行，语出《礼记·中庸》：“博学之，审问之，慎思之，明辨之，笃行之。”意为在博学、审…
733	Guizhou University of Engineering Science	明德笃学、弘毅力行	MOR0; SCH; MOR1; ACT	一．校训立意 “明德笃学 弘毅力行”是对贵州工程应用技术学院办学理念的高度概括，体现学校的办学方针，培养目标，又体现教师治学和学生学习的应有态度，不仅言简意赅，而且寓意深刻，富有哲理。八字校训既独立成意，各有侧重，又相互联系，浑然一体，涵盖了教育思想、治学精神、品格修养等方面。同时，校训与毕节学院 “艰苦创业、 不断进取” 的办学精神和“坚定信念、艰苦创业、求实进取、无私奉献”的毕节试验区精神的紧密结合。 二．校训解读 “明德”，就是要明晓事理，涵养品行。语出《礼记.大学》，是中国传统 文化和大学精神的精华。“德” 为一切之根本，是育人为本、德育为先的体现。 “明德”不仅要修个人之身，养个人之德，还要心怀天下。 “笃学”，“笃”，一心一意、坚持不懈；“笃学”，专心好学。语出《三国志.吴志》。寓意学生敏而好 学，博闻强识；教师诲人不倦，刻苦钻研，为社会培养德智体美全面发展的社会主义建设者和…
734	Kaili University	立德树人，自强奋进	MOR0; MOR2; WILL; WILL	学校是培养人才的场所，立德树人是教育的根本任务。立德树人既有对教师的要求，也有对学生的要求。学高为师，德高为范，高尚的师德是对学生最生动、最具体、最深远的教育。教师在传道授业的同时，引导学生树立正确的世界观、人生观、价值观和荣辱观，养成良好的价值品质和高尚的道德情操，将学生培养成中国特色社会主义的合格建设者和可靠接班人。 自强奋进，意为自己强大了才能在漫长的生存发展道路上奋勇前进，这里是作为激励师生苦练内功，日益强盛的精神力量提出来的。凯里学院是一所新建地方本科院校，只有加快发展，壮大自己才能向着合格本科院校的目标奋勇前进。凯里学院地处少数民族落后地区，多数师生都来自本地区，当激励他们树立自信心，从而增强自身内在动力奋发向上。凯里学院的老师为培养合格人才，当不断提高自身的素质和能力，才能做到学为人师，行为世范；凯里学院的学生在养成良好品德的同时学好科学文化知识，练就过硬本领，才能成为中国…
735	Qiannan Normal University for Nationalities	崇德博学、敬业创新	MOR0; SCH; PROF; INNO	学校秉承“崇德博学 敬业创新”的校训，坚持“艰苦奋斗、自强不息、创新发展”精神，以“师范性、民族性、地方性、应用型”为办学特色定位，立足黔南、面向贵州、辐射西部，培养“一扎根、两服务”的高素质应用型人才，以建设成区域内高水平、有特色的新型民族师范大学为发展目标定位。
736	GuiZhou University of Finance and Economics	厚德、博学、笃行、鼎新	MOR0; SCH; ACT; INNO	释义： 修身养性，保持高尚的品德和情操；励学善思，追求广博的学识和才干；知行统一，投身事业和社会实践；开拓进取，适应不断发展的时代要求。 典据： “厚德”取于古训“天行健自强不息，地载物厚德与秋”。厚，敦实、厚重、忠厚。德，修养、品行。论语述而：“德之不修，学之不讲”。又颜渊：“君子之德风，小人之德草。” “博学”、“笃行”源自论语博学（中庸）：“博学之，审问之，慎思之，明辨之，笃行之”。博，宽广、广博，屈原《离骚》：“思九州之博大兮”；学，学习、思考、请教，论语述而：“学而不厌”，文雍也：“有颜回者好学。”笃，坚定、踏实，《荀子·修身》：“笃志而体”；行，执行、做、行为，论语先进：“子路问‘闻思行诸’”又公冶长：“听其言而观其行。”孟子梁惠王上：“夫我乃行子，反而求之，不得吾心。”庄子逍遥游：“行比一方。” “鼎新”选用成语“革故鼎新”的除旧布新、开拓创新之意，《周易·杂卦》：“革，去…
737	Guizhou Minzu University	自强不息、全面发展	WILL; WILL	“自强不息”指自己自觉地努力向上，开拓奋进，永不懈怠，造福天下，振兴中华。“自强不息”出自《周易•乾》:天行健，君子以自强不息。意为天体运行，周而复始，永不停息，君子应效法天，强制自己，努力奋进，坚持不懈，造福天下。 “全面发展”指自己自觉按照党和国家的教育方针要求，坚持为社会主义现代化建设服务，为人民服务，与生产劳动和社会实践相结合，成为德智体美全面发展的社会主义建设者和接班人。“全面发展”坚持教育为社会主义现代化建设服务，为人民服务，与生产劳动和社会实践相结合，培养德智体美全面发展的社会主义建设者和接班人”。 “自强不息全面发展”作为校训，意为贵州民大人要时时刻刻激励鞭策自己，自觉地努力向上，开拓奋进，永不懈怠;要按照党和国家教育方针的要求，坚持为社会主义现代化建设服务，为人民服务，与生产劳动和社会实践相结合，成为德智体美全面发展的社会主义建设者和接班人，为富民兴黔、振兴中华、造福民…
738	Guiyang University	博、新、雅、信	SCH; INNO; MOR1; MOR2	博——学识广博、胸襟博大、仁心博济； 新——与时俱进、勇于探索、敢于创新； 雅——气质高雅、行为高尚、品格高洁； 信——诚信笃实、信念坚定、追求真理。
739	Liupanshui Normal University	厚德博学，范行求真	MOR0; SCH; MOR1; SCH	校训，是校园文化和育人环境的重要组成部分。它以凝练而富有哲理的语言，宣扬学校深厚的文化底蕴和办学传统，体现学校的整体个性和追求方向。校训，是一种无形的力量，对于造就和培养学者有潜移默化的、润物无声等不可估量的作用。 通过面向全校师生征集，广泛征求全校副科级以上干部、副教授以上职称教师的意见，从征集的36件作品中遴选，反复酝酿、斟酌。2003年9月10日，学校党委研究决定，以“厚德博学，范行求真”作为我校校训。 厚德：即重视道德修养。语出《周易》“天行健，君子以自强不息；地势坤，君子以厚德载物。”崇尚个人修身、注重品行操守，是中华民族的优良传统。“君子不患位之不尊，而患德之不崇。”人们终其一生都要不断地厚德修身。据世界权威机构一项对成功人士的研究发现，一个人的成功70%取决于情商，只有30%取决于智商。情商包括坚强的毅力，艰苦奋斗、吃苦耐劳的精神，团结合作等道德因素。一切的成功首先在于做人…
740	Guizhou University of Commerce	尚信塑品,致用立身	MOR1; MOR1; ACT; MOR	贵商校训“尚信塑品·致用立身”诠释——“信”的意涵为：信仰、信念、诚信。尚信塑品就是以信仰、信念、诚信为核心塑造职业品格，把信仰、信念、诚信作为砥砺品行的价值标杆，是做人的准则。“用”的意涵为：有用、会用、善用。致用立身就是以有用、会用、善用为核心锤炼应用能力，把有用、会用、善用作为服务社会的价值评判，是做事的要求。校训寓意着贵商人应当具有家国情怀、诚信基因、工匠精神、贵商品格。
741	Guizhou Police College	忠诚、严格、求实、勤奋	MOR3; DIL; ACT; DIL	校训：忠诚 严格 求实 勤奋 忠诚：忠于党、忠于祖国、忠于人民、忠于法律； 严格：严格训练，严格管理，严格要求； 求实：实事求是，脚踏实地，求真务实； 勤奋：孜孜以求，不怕困难，攻坚克难，永不退缩。
742	GuiYang Healthcare Vocational University	明德至善、精诚致远	MOR0; MOR1; MOR1; WILL	明德至善：语出《大学》开篇：“大学之道，在明明德，在亲民，在止于至善。”意思是说，大学的宗旨在于弘扬光明正大的品德，在于使人弃旧图新，在于使人达到最完善的境界。阳明先生语：“至善是心之本体，只是明明德至精至一处便是”。至精至一处，需博学之、审问之、慎思之、明辨之。寓意为学校办学的核心就是上下求索，达明德至善之境；海纳百川，引导学生做有为大器青年，追求光明正大的品德，立身立学要有思辨精神，使自身的境界达到至善至美，识得灵根孕育，涵养自在天真自然本性，步入明德至善、修身齐家治国平天下的境界。 精诚致远：精诚，语出《庄子》：“真者，精诚之至也，不精不诚，不能动人。”《中庸》：“诚者，天之道也；诚之者，人之道也。”同时，也语自孙思邈《备急千金药方·大医精诚》。诚是宇宙间万事万物的本质。平日所说的“精诚所至，金石为开”与“大医精诚”皆有此意。倡导广大师生医护员工以至诚之心做人、做事，为医、为教、为…
743	Guizhou Education University	为人师表	PROF	“为人师表”出自《北齐书·王昕列传》：“杨愔重其德业，以为人之师表。”学校以“为人师表”为校训，勉励师生要有“师”者之心，仁爱之德，学识和品德并重，成为博学之人、贤德之人。
744	Guizhou Institute of Technology	知行至善、厚积薄发	SCH; ACT; MOR1; DIL	“知行”，是指客体顺应主体，知是指科学知识，行是指人的实践，知与行的合一，既不是以知来吞并行，认为知便是行，也不是以行来吞并知，认为行便是知。由明朝思想家王守仁提出，指认识事物的道理与在现实中运用此道理，是密不可分的。中国古代哲学家认为，不仅要认识（“知”），尤其应当实践（“行”），只有把“知”和“行”统一起来，方能称得上“善”。 “至善”出自《礼记·大学》“大学之道，在明明德，在亲民，在止于至善。” 大学教人的道理，在于彰显人人本有，自身所具的光明德性（明明德），再推己及人，使人人都能去除污染而自新（亲民，新民也），而且精益求精，做到最完善的地步并且保持不变。 “厚积”：指大量地、充分的积蓄；“薄发”：指少量的、慢慢的放出。即日积月累、求博达深、蓄势而发。意义是经过长时间有准备的积累即将大有可为，施展作为。作为校训它包含两层意思：一是作为教师，要不断地在知识和道德上积累，实现教学相长；…
745	Yunnan University	自尊、致知、正义、力行	MOR1; SCH; MOR1; ACT	东陆大学成之，唐继尧为之作校训四，如下： 自尊 志学而立，健以自强。不偏不倚，毋怠毋荒。世方万变，我自抱一。高乃自危，立乃毋踬。 致知 子与有言，立乎其大。大者先立，天君自泰。何以致之，在致良知。良知吾心，吾心乃师。 正义 履蹈正谊，罔涉回邪。耿介拨俗，尽扫浮夸。廉隅外砺，诗书内华。不折不挠，凛然孔嘉。 力行 非知之艰，行之维艰。知行合一，允矣名言。庄敬曰强，同撑大厦，愿持此言，质诸天下。 这八字校训，“自尊”谓心态，“致知”求学，“正义”谈道德，“力行”求实践，其下的四首四言诗，系唐氏之注也。 校刊颁行，唐氏还作了《序》文。序中称“民国十二年，东陆大学成。继尧以兴学育才，愼厥始，图厥终，辅之翼之，启之迪之，乃述所学为校训。”可见，校训中有唐继尧自己的投影在。唐氏述其学历：“自幼蒙家书，服膺《传习录》，少长读，《文成全书》，及理学宗传，明儒学案诸名著，窃窃奉之以为宗。比来……盖信自治治人…
746	Kunming University of Science and Technology	明德任责、致知力行	MOR0; MOR2; SCH; ACT	“明德”：出自《大学》:“大学之道，在明明德”。“任责”：即承担责任。“致知”：达到完善的理解。通过在一定规矩里学习知识后，达到对事物的完善的理解，就是格物致知的意思！“力行”：出自《朱子语录》：“论先后，当以致知为先；论轻重，当以力行为重”。 “致知力行”出自1922年成立的东陆大学（云南大学前身）校训“自尊、致知、正义、力行”。昆明理工大学2004年50周年校庆时，提炼了校训，昆工作为东陆大学一个重要后继者，结合理工大学特质，亦继承了部分云大校训。
747	Yunnan Agricultural University	厚德博学、明理尚农	MOR0; SCH; MOR1; PROF	诠释：品格高尚、知识渊博，追求真理、献身三农。 “厚德”：心胸宽广不以个人得失为主，重公轻私，谓之厚德。“博学”:广泛地全面的学习。厚德出自《易经·坤卦》中的“地势坤，君子以厚德载物”。“博学”出自《礼记·中庸》中的“博学之，审问之，慎思之，明辨之，笃行之”。厚德博学不仅表现为厚人之德、博人之学，还表现为厚社会之德、博社会之学。“明理”:明察事理；懂道理。“尚农”：崇尚农业。 农业大学校训旨在培养出品格高尚，知识渊博的面向现代化的农业人，同时农大人也在不断追求真理，献身三农，积极投身于祖国的现代化事业的建设中。这八字校训正是体现了农大品格高尚、知识渊博，追求真理、献身三农的精神。
748	Southwest Forestry University	树木树人、至真至善	PROF; MOR2; SCH; MOR1	“树木树人”，出自《管子·权修》：“一年之计，莫如树谷；十年之计，莫如树木；终身之计，莫如树人。”“树木”是林业教育的特殊性和学科特色，“树人”是高等教育的普遍性和根本任务。“树木树人”集中体现了西南林业大学作为林业高等院校的办学宗旨和特色，既能较好地体现林业高等教育个性与共性的统一，还蕴含着西南林业大学孕育生成、几经分合以及从立校、迁校、建校到强校的发展历程。 “至真至善”，集中体现西南林业大学的办学理念和方法。学理在于求真，事理在于求善。“至真”就是要追求真理、学做真人，正如教育家陶行知先生所言：“千教万教，教人求真；千学万学，学做真人”。“至善”是指一种最高的道德境界和道德追求，旨在要我们善待万物、追求和谐。孔子在《礼记·大学》中写道：“大学之道，在明明德，在亲民，在止于至善。”“至真至善”就是把崇尚科学、追求真理的科学精神与善待自然、追求和谐的人文精神相结合，是做学问与做人相统一…
749	Kunming Medical University	崇德、精业、团结、奉献	MOR0; PROF; MOR2; MOR3	“崇德”之“崇”是推崇的意思。“德”,是道德、德行,也就是人的品质或品格。“崇德”即主张人要推崇高尚的品格,这是为人之本.把它列于首位，体现了“育人为本、德育为先”的办学指导思想。崇德，精业，团结，奉献既是医大对每个学生的要求，也是医大人一直具有的品质。在现代人们的对健康问题的不断重视下，医大可以说是任重而道远。
750	Dali University	博学达真,大德至理	SCH; SCH; MOR0; SCH	大理大学校训博学达真，大德至理“博学达真”，就是“博于问学，明于睿思，笃于务实，志于成人”，涵盖了学习、思考、实践、做人四者关系 唯有四者相辅相成且持之以恒，方能形成良好的素质，成为有真才实学的人 “君子务本”，博学就是学人学者之本；“达真”就是要有真学问、真能力、求真务实，达到真境界；还要有不断探寻真知，追求真理的精神 “ 大德至理”，大德即盛德 《易经》上说“天地之大德曰生”，又说“日新之谓盛德”，意为天地最大的德行是生成物，日日新、不断创新、才能生生不息 又可以引伸为“德者，德也” 内得于已，外得于人 内得于已，就是说你自己要提高自身的科学文化素质、道德精神素质等，才能有最大的收获 外得于人，也就是说你只有惠泽别人，给予别人，别人才能给予你 “德育为先”，教化以维新 “至理”，从字义上讲，可以理解为最正确的道理 “至”即达到极点，“至理”还是最深刻，最高层次的哲理 “至理”可以引申…
751	Yunnan University of Chinese Medicine	崇德和合、博学敦行	MOR0; INCL; SCH; ACT	我院标准校训由云南省著名书法家赵翼荣教授于2008年9月题写。校训可单独使用，也可与校微组合使用。 索德和合博學敦行 一、辞源 1、“祟德 出自《论语·颜渊第十二)“主忠信，徒文，累德。"(河南程氏椁语·论道篇》亦云：“一德立而百善从之。”中医之源《易经-基辞下》说“精义八神，以致用也；利用安身，以票德也”。强调以“精义”安身，是为崇德。素德，意为推南高尚的品德：也指大德。最高品位的品德。 2、“和合” 最早出自《国语·郑语):“商契能和合五教，以保于百姓者也。《管子》将和合并举连用“畜之以道。则民和，养之以德，周民合。和合故能习。”(吕氏春税》也说。天地和合，生之大经也”:《墨子·岗同中》,“内之父子兄弟作愿冒，皆有离散之心，不能相和合?”(神农本草经)说“凡此七情和合视之，当用相须相使良者，物用相恶相反者”。明代高濂著(遵生八篓)中有：“阴阳和台，接御有度，可以蓝年”。“和合”词意为…
752	Yunnan Normal University	刚毅坚卓	WILL; WILL	1938年10月，西南联大常委会成立了校歌校训编制委员会，聘请冯友兰、朱自清、罗常培、罗庸、闻一多为委员，冯友兰担任主席。经广泛征集和认真讨论，校训拟订为“刚健笃实”，随后报常委会。11月底常委会讨论后，将校训改定为“刚毅坚卓”并向全校公布，同时报呈教育部。 联大校训“刚毅坚卓”是联大精神的高度概括。它既融会了三校校训的精神，也是对联大成立后师生们在学习、工作、生活各方面思想精神风貌的总结提炼，内涵极其丰富。在以后的8年中，联大校训一直鼓舞着师生们坚定信念，共度艰难。 云南师范大学的历史，就是西南联大历史的延续，她继承与弘扬西南联大的精神，尤其是秉承其“刚毅坚卓”的校训，作为自己立校办学的根本指导理念。 校训中“刚毅”一语最早的完整诠释见于《礼记•儒行》：“儒有可亲而不可劫也，可近而不可迫也，可杀而不可辱也，其居处不淫，其饮食不溽，其过失可微辨而不可面数也。其刚毅有如此者”。至于“坚卓”…
753	Zhaotong University	大学无疆,大人有容	SCH; INCL	“大学无疆”之“无疆”意指没有止境。学无止境，教无止境，科学无禁区，学问无禁区。不固步自封，不自以为是，不作茧自缚，海纳百川，兼容并蓄。“大人有容”意指造就伟大的人格，培养开阔的胸襟，具备宽容的精神，世界眼光，开放意识，立大志，做大人。
754	QuJing Normal University	刚正博爱、睿智笃行	MOR1; MOR3; SCH; ACT	校训：刚正博爱 睿智笃行 释义：八字校训言简意赅、富有哲理。既反映了我校的优良传统与特色，又能体现学校办学的理想追求与实现途径；既各有侧重，又相互联系，浑然一体，涵盖了品格修养、教育思想、治学精神等方面。号召要师生养成宁折不弯、正直向上的品德，要有宽以待人、善待万物的胸怀，要掌握正确的方法，要不断实践、知行合一，以我所学回报社会，努力成为国家的中流砥柱、社会的表率。 “刚正”，“刚”是刚健、刚毅；“正”是正直、中正。语出《易经·乾》：“刚健中正，纯粹精也”。意为刚劲强健而中正不偏。“博爱”源于中国传统文化中的“仁”和“兼爱”的思想。《论语·颜渊》：仁者“爱人”。《孟子·梁惠王上》“老吾老以及人之老，幼吾幼以及人之幼”。《墨子·兼爱》：“天下兼相爱则治……” 。韩愈 “博爱之谓仁，性而宜之谓之义”。博爱就是一视同仁。陶行知说“没有爱就没有教育”。“刚正”是学校百年师范办学历史的写照，体现了…
755	Pu`er University	固本和谐、创新致远	INCL; INNO; WILL	固本：修身立德，笃学厉行。《论语•学而篇》上讲“君子务本，本立而道生”，学习、修德，是高校师生所要坚固之根本。坚固根本，方能远行。 和谐：讲信修睦，修己安人。《礼记•礼运》中有“大道之行也，天下为公，选贤与能，讲信修睦。”在少数民族聚集的国门高校，师生应当修己安人，以诚待人，共同建设一个诚信、团结、和睦的和谐校园。 创新：昂扬向上，气象常新。《礼记•大学》记载早在商汤时代的盘铭之上就镌刻着“苟日新，日日新，又日新”，说明只有具备创新精神，才有不竭的生机和活力。“创新”要求学校师生勇于革新，进德修业，与时偕行。 致远：胸怀天下，志在四方。致远，出自诸葛亮的《戒子篇》：“夫君子之行：静以修身，俭以养德。非淡泊无以明志，非宁静无以致远。”意在鼓舞师生胸怀天下，树立远大抱负，实现高远志向。
756	Baoshan University	厚德、励学、敬业、笃行	MOR0; SCH; PROF; ACT	学校扎根保山，立足云南，服务边疆，辐射南亚东南亚；秉承“厚德、励学、敬业、笃行”的校训，以本科教育为主，积极发展专业研究生教育。经过40多年的拼搏发展，为边疆民族地区培养了一大批“建好家乡、守好边疆”的合格人才，为民族团结进步、生态文明建设和边疆和谐稳定做出了重要贡献，努力做到“党办的大学让党放心，人民的大学不负人民”。
757	Honghe University	博远有鸣,开阔弘毅	INNO; MOR1	校训：博远有鸣，开阔弘毅 出处：1、博远楼、有鸣潭。2、（宋）朱熹《朱子语类》：“学者当养教气宇，开阔弘毅。” 从各个方面阐扬了我校偏处一隅而不坠青云之志的大学理想与教育使命—— 目标：追求博大高远的学术境界和教育理想。 行为：积极奋发、争鸣天下，发声学林，有所作为。 心胸：开放包容，不拘一格。 抱负：力争上游，耻居下品。 意志：坚定顽强，不屈不挠。 释义： 我校有楼，名曰“博远”，平地而起，博大高远，学者云集，教化之地也。博远之下，一水枕之，水光潋滟，微波粼粼，斯所谓“有鸣潭”者也。“有鸣潭”者，乃“有名堂”之谐音，暗寓一校之心，其志不在小也。古来之所谓有名堂者，无不先有鸣而后成其名堂，一校之微，一潭之小，欲成其名堂，非有鸣而不可，故曰“有鸣潭”。 一楼之博大而高远，一水之沉静而蕴藉，彼此依存，共为一景。水映楼，楼矗水，博远之楼入于有鸣之潭，有鸣之潭衬于博远之楼。登斯楼而小天下，学问之…
758	Yunnan University of Finance and Economics	好学笃行，厚德致远	SCH; ACT; MOR0; WILL	一、校训 “好学笃行，厚德致远”为云南财经大学校训。《礼记》云：“儒有博学而不穷，笃行而不倦。”《易经》云：“地势坤，君子以厚德载物”。校训取诸义而用之，倡导学生诚心向学，勤于实践，知行统一，学行共长，激励学生涵养大德，容载万物，志存高远，追求卓越。 二、云财精神 “自强不息，敢为人先”的云财精神历经曲折、奋进与跨越之历史而形成。《易经》云：“天行健，君子以自强不息”。历代云财人秉承自强不息的民族精神，刚毅坚卓，攻坚克难，发愤图强，永不停息，弘扬敢为人先的时代精神，敢于解放思想，善于抢抓机遇，深化改革开放，追求跨越发展。云财精神容载传统文化与时代精神，彰显继往开来、永不停息的精神境界与理想追求。
759	Yunnan Arts University	务实、求新、尚美	ACT; INNO; PROF	面向未来，学校将始终遵循“继承传统、学习民间，兼容中外、服务社会”的办学理念，秉承“海涵地负、继往开来” 的学校精神，“务实、求新、尚美”的校训，立足于云南地理区位优势和文化资源优势以及综合艺术院校办学优势，主动服务和融入国家和云南发展战略，致力于建设具有国际影响和特色鲜明的国内一流艺术院校。
760	Yunnan Minzu University	格致明德、弘道至善	SCH; MOR0; SCH; MOR1	“格致”是“格物”和“致知”的简称，最早见于《礼记·大学》：“格物、致知、诚意、正心、修身、齐家、治国、平天下”，“致知在格物，物格而后知至”。“格致”是推究事物的原理法则，从而获得真知之意，侧重于探求外在世界。 “明德”源自《礼记·大学》：“大学之道，在明明德，在亲民，在止于至善”。“明德”就是加强道德自我完善，彰显人性中美好的德行，强调内在的自我提升和超越。 “弘道”语出《论语·卫灵公十五》“人能弘道，非道弘人”。“弘道”就是要探究和传授知识，掌握科学原理与法则，探究经济社会发展规律，并不断追求和实现创新；同时，它还要求将学术行为和治学精神结合起来，强调科学精神与人文精神的高度合一。 “至善”是伦理学中的最高概念。至者，极、最也；善者，美好也。指通过不懈努力，达到尽善尽美的境界。“至善”是人类道德追求的终极价值目标，也含有在学术研究、科学探索等方面追求无止境之意。 “格致明德、弘道至…
761	Yuxi Normal University	至真至善、致美致用	SCH; MOR1; WILL; ACT	学校秉承“至真至善 致美致用”校训精神，立足滇中、扎根玉溪、服务云南、辐射东南亚，为云南尤其是玉溪和周边地区培养近7.5万余名服务地方基础教育和经济社会发展需要的合格人才，为区域基础教育和滇中经济社会发展做出贡献。
762	Chuxiong Normal University	笃学尚行，扬美崇善	SCH; ACT; WILL; MOR1	笃学：对真理与学问的敬重和孜孜以求； 尚行：务实重行与知行合一； 扬美：弘扬对美的追求与创造； 崇善：追求以善为本的做人品格。
763	Yunnan Police College	忠诚、责任、奉献	MOR3; MOR2; MOR3	新时代新征程，学校坚持以习近平新时代中国特色社会主义思想为指导，全面贯彻党的二十大精神，落实立德树人根本任务。坚持以本科教育为主体，协调推进在职民警及外籍警察培训，积极发展研究生教育。坚持立足公安，服务社会；立足云南，服务全国；辐射南亚东南亚，面向世界。坚持政治建警、政治建校方针，大力弘扬“忠诚、责任、奉献”校训精神，努力建设区位优势明显、办学特色鲜明、符合实战需要的全国一流公安院校。
764	Kunming University	明德至善，知行利物	MOR0; MOR1; SCH; ACT; MOR2	学校传承“聂耳精神”，遵循“修德、惟真、博识、笃行”的办学理念，践行“明德至善，知行利物”的校训，坚持社会主义办学方向，落实立德树人根本任务，为党育人、为国育才，是云南省首批培育社会主义核心价值观示范高校、首批“三全育人”综合改革试点高校，培养了大批“思想品德优，理论基础实，专业能力强，综合素质高”、“上手快、后劲足、能创新”的高素质应用型人才。
765	Wenshan University	博思审问,明德笃行	REAS; REAS; MOR0; ACT	校训“博思审问，明德笃行”是办学的基石，校训全面体现了学校办学使命及现实发展对全校师生员工的要求和学校的办学理念及大学精神的价值取向，具有丰富而深刻的时代内涵。 校训“博思审问，明德笃行”是办学的基石，多思考，多问为什么。 笃行语出《论语·卫灵公》：言忠信，行笃敬。这一命名要求每位师生为人为学言语忠诚老实。 明德语出《大学》开篇：大学之道在明明德，在亲（新）民，在止于至善—彰显高尚的道德，使受教育者的思想革旧从新，使受教育者的思想达到至善至美的最高境界。 校训体现了学校办学使命及现实发展对全校师生员工的要求和学校的办学理念及大学精神的价值取向，具有丰富而深刻的时代内涵。
766	West Yunnan University	立德修身、笃学尚行	MOR0; MOR1; SCH; ACT	学校的办学理念：立德与树人相长，科技与人文交融 找准办学定位，确立发展目标。学校以习近平新时代中国特色社会主义思想为指导，围绕服务国家战略和云南“3815”战略发展目标，紧紧围绕建成国内外知名的应用型国门大学目标，结合学校实际，确立“三性四群五工程”的办学定位和发展思路，坚守“立德与树人相长、科技与人文交融”的办学理念，秉承“立德修身、笃学尚行”的校训，不断彰显“地方性、应用性、开放性”的办学特色，扎根临沧、立足滇西、面向云南、服务全国、辐射南亚东南亚，成为红土高原高等教育一道亮丽的风景。“三性”即凸显“地方性、应用性、开放性”的办学特色；“四群”即着力打造服务中缅通道建设、高原特色生物产业、教师教育和新媒体新工科新农科四大专业集群；“五工程”即实施“个十百千万”五大工程，把建设国内外知名的应用型国门大学作为学校奋斗目标。
767	West Yunnan University of Applied Sciences	德学思行、智真善美	MOR0; SCH; REAS; ACT; SCH; MOR1; MOR1; WILL	滇西大是教育部批准直接组建的全国首批应用技术大学，是教育部在滇西片区六大精准帮扶项目之一。学校承载着深化高等教育改革、职业教育改革，助推滇西脱贫开发、扶持产业转型升级的历史使命。学校充分借鉴德国、瑞士应用技术大学模式，秉承“创办一个学院，振兴一个产业，造福一方百姓，传承一方文化”的办学宗旨，总部加若干特色学院、应用技术研究院的开放式办学构架，以及“政、产、学、研、用”一体化模式，“分层治理、产教融合、需求驱动、合作办学、开放衔接、省部共建”的办学原则，致力于培养滇西地区乃至周边区域经济社会发展所需要的应用型高层次技术技能型人才。
768	Xizang Agricultural and Animal Husbandry University	博学为农、精业兴藏	SCH; PROF; PROF; MOR3	倡导教师应学识渊博、造诣精深，倡导学生应打下厚实的功底，全面提升综合素质；倡导辛勤劳动、精通业务、服务西藏。
769	Tibet University	团结、勤奋、求实、创新	MOR2; DIL; ACT; INNO	团结，要求全校各族师生要高度重视民族团结、倍加珍惜民族团结、坚决维护民族团结，促进各民族同呼吸、共命运、心连心，在祖国大家庭的怀抱里创造幸福的今天和更加美好的明天。 勤奋，要求全体师生发扬“特别能吃苦、特别能战斗、特别能忍耐、特别能团结、特别能奉献”的老西藏精神。 求实，要求全体师生要解放思想、实事求是，一切从实际出发，踏踏实实，兢兢业业，为我校“靠得住、用得上、留得下”人才培养目标的实现而努力奋斗。 创新，要求全体师生要与时俱进，大胆探索，开阔视野，开拓进取，积极推进学校内涵式发展、促进校园和谐稳定，为把西藏大学建设成为高水平综合大学而努力奋斗。
770	Xizang Minzu University	爱国、兴藏、笃学、敬业	MOR3; MOR3; SCH; PROF	办学65年来，西藏民族大学全面贯彻党的教育方针和民族政策，精勤进取、笃行不倦，秉承“爱国、兴藏、笃学、敬业”的校训，弘扬“担当奉献、求真务实、和谐发展”的办学精神，坚持立足陕西、面向西藏、服务新时代党的治藏方略的办学宗旨，始终与西藏革命、建设、改革事业共命运,与西藏经济社会发展同进步，积极发挥西藏高等教育孵化器、专业人才培养基地、科学研究和文化传承创新重要平台、民族团结进步教育基地、西藏在内地的重要窗口等作用，始终致力于全面落实党和国家治藏方略，维护祖国统一、民族团结，反对分裂；始终致力于全力服务西藏经济长足发展和长治久安；始终致力于为西藏培养一支靠得住、用得上、下得去、留得住的高素质干部队伍，为党和人民、为西藏各项事业发展培养了一大批优秀干部和专业技术人才。
771	University of Tibetan Medicine	厚德、勤学、笃行、利众	MOR0; SCH; ACT; MOR2	无释义
772	NorthWest University	公、诚、勤、朴	MOR3; MOR1; DIL; MOR1	西北大学校训诞生于挽救民族危亡的抗战时期。公，即“天下为公”的家国情怀，教育师生扎根西北、胸怀天下、放眼世界；诚，即“不诚无物”的道德信念，鞭策师生以至诚感动万物；勤，即“勤则不匮”的优秀品质，要求师生勤勤恳恳、坚韧不拔；朴，即“抱朴守真”的价值追求，激励师生始终保持朴素的本真状态。公诚勤朴，饱含着对中华民族传统美德和办学使命的深刻理解，激越着百年老校发扬民族精神，融合世界思想，肩负建设西北重任。
773	Xi’an Jiaotong University	精勤求学，敦笃励志，果毅力行，忠恕任事	DIL; SCH; DIL; WILL; WILL; ACT; MOR3; MOR2; ACT	2005年4月4日，西安交通大学决定启用1937年《交通大学一览》公布的校训。 【精勤求学】 精勤：指专心勤勉。《后汉书·冯勤传》："以图议军粮，在事精勤。遂见亲识。"南朝宋刘义庆《世说新语·术解》："郗愔（yin）信道，甚精勤。"求学：求--探索，寻找；学--学问、学业。求学意为探求学问。《朱熹·中庸章句集注》于"博学之，审问之，慎思之，明辨之，笃行之"下注中引述"程子曰：五者废其一，非学也。"校训旨在培养学生如何做学问，养成勤奋学习的品行，完善知识结构，敏而好学，不耻下问；慎于思考，明辨是非；学无止境，终生不辍；理论联系实际，学以致用。 【敦笃励志】 敦笃：指敦厚笃实。《左传·成公十三年》："勤礼莫如致敬，尽力莫如敦笃。"敦厚：诚朴宽厚。《礼记·经解》："其为人也，温柔敦厚，《诗》教也。"笃实：纯厚朴实，忠诚老实，踏实实在。《易·大畜》："大畜刚健。笃实辉光。日新其德。"韩愈《独孤府…
774	Northwestern Polytechnical University	公、诚、勇、毅	MOR3; MOR1; MOR1; DIL	“公”：公为天下，报效祖国； “诚”：诚实守信，襟怀坦荡； “勇”：勇猛精进，敢为人先； “毅”：毅然果决，坚韧不拔。
775	Xi’an University of Technology	祖国、荣誉、责任	MOR3; MOR3; MOR2	祖国——牢记自己是炎黄子孙，有高度的民族自尊心，奋发向上，热爱祖国，为祖国的繁荣富强奉献一切。 荣誉——强烈的荣辱观、是非观，有为国家增光，为集体添彩，勇于争先的荣誉感。 责任——对国家、社会和家庭的高度责任感，以艰苦奋斗、一往无前的精神和对人、对事极端负责的态度，努力学习，服务社会，报效祖国。 “祖国、荣誉、责任”是完善人格的三个基本支撑点，学校要以培养学生具有执着的爱国精神、强烈的荣辱观和高度的责任感为育人的基本准则，严格要求学生，铸就栋梁人材。
776	Xidian University	厚德、求真、砺学、笃行	MOR0; SCH; SCH; ACT	君子当厚德载物 厚德，出自于《周易》中的卦辞：“天行健，君子以自强不息；地势坤，君子以厚德载物。”意指我们应该心胸宽广不以个人得失为主，重公轻私。这是对同学们道德上的要求，是放在第一位的。我国自古以来就重视个人与国家的关系，有修身齐家治国平天下之说；在当下社会，更加注重小我与大我的关系，要求当代学生不仅要有完备的知识储备，更应该有强烈的社会责任感，只有这样，才能培养对国家有用的人才，才完成了高校的使命。希望大家可以谨遵校训，厚德载物，心中有国，做一名高素质人才。 君子当求真务实 求真，可理解为求索真理，扩展为希望大家脚踏实地做事，唯有如此方可仰望星空。作为一名大学生，当下在学校的任务当然是求索真理，荣登知识的高堂。当然，求真含义可扩展为在生活和学习中，我们要有探索世界，追求真理的勇气和毅力，无论做什么事情都要有一种严谨的科学精神，做任何事都要坚持不懈，实实在在，不驰于空想，不骛于虚声，即…
777	Xi’an Technological University	敦德励学,知行相长	MOR0; SCH; ACT	风雨兼程六十九载，一代代西工人扎根西部、献身国防，始终践行“敦德励学，知行相长”的校训，弘扬“忠诚进取，精工博艺”的校风，传承“把一切献给党”的军工传统精神，弘扬与时俱进的“在创新中追求卓越”的现代军工精神，形成了独有的“忠诚进取铸辉煌、精工博艺育英才”的西安工大精神。
778	Xi’an University of Architecture and Technology	自强、笃实、求源、创新	WILL; ACT; SCH; INNO	大学校训反映大学的精神风貌，我国很多大学的校训都直接或间接受到古代经典的影响，散发着浓浓的“经典”味。 以地处西北的西安建筑科技大学来说，在长久办学过程中，凝练出“自强、笃实、求源、创新”的校训，其中就蕴含着中国传统文化的精华。 自强不息的精神 “自强不息”一词早见于儒家经典《周易》中“天行健，君子以自强不息”这句话。这句话被国人传颂两千多年，激励着一代又一代中国人自我砥砺，发愤图强，影响可谓深远，自强不息遂成为中国文化的基本精神之一。 《周易》在写作上具有推天道以明人事的特征。“天行健，君子以自强不息”先阐述了天运行昼夜不息、周而复始、刚劲强健的特征，进而强调人们的主体自觉，把天所具有的刚健品格通过实践内化为人的品格。 如何做到自强不息？《周易》提出“君子终日乾乾，夕惕若厉，无咎”观点，并进行了如下阐述：“子曰：君子进德修业。忠信，所以进德也。修辞立其诚，所以居业也。知至至之，可与几也…
779	Xi’an University of Science and Technology	祖国利益高于一切	MOR3	牢记自己是炎黄子孙,是中国人民的儿女,是以强烈的责任感, 服务社会,报效祖国,为中华民族的伟大复兴而努力奋斗! 学校精神是对全校师生员工在学校建设和发展过程中形成的群体意识和精神境界的总结、概括与升华。励志图存、自强不息既是我校昔日历史的真实写照,也是我们今天勤奋的生动体现,更是明朝学校发展仍要发扬的精神。
780	Xi’an Shiyou University	好学力行、自强不息	SCH; ACT; WILL	“好学力行、自强不息”的校训分别出自《中庸》和《易经》中“好学近乎知，力行近乎仁”、“天行健，君子以自强不息”两句话，激励我们勤奋好学，身体力行，努力做到学行合一，知行合一，并应像天一样，自我力求进步，刚毅坚卓，发愤图强，永不停息。“好学力行”是对学校办学传统和治学风格的深刻概括，“自强不息”是对石油人不畏艰险，勇攀高峰精神的高度凝练。全体教职员工要勤勉、好学、奋进，养成认真、严肃、实事求是、尊重真理、尊重知识的态度，坚决反对华而不实、浮光掠影、不求甚解、浅尝辄止的作风。在培育、塑造人的过程中做到不辞劳苦，不知疲倦，诲人不倦，认真授业。对教书育人的工作做到极端负责，对学生要有耐心，极端热忱，方法要得当，循循善诱，因材施教，对症下药，永不停息地向更高更新的境界攀升！
781	Shaanxi University of Science & Technology	至诚至博	MOR1; SCH	“诚”和“博”是从中国古代前贤名句选取而来，体现了陕西科技大学的传统精神。“诚”是维系人类社会的最高道德规范，也是中国传统文化的精神内核。“诚”的含义包括诚朴、诚信、诚实，蕴含朴实无华，以诚相待，取信于人。“博”是指学问渊博，是人生追求学问和事业的境界，含义是博大精深、经天纬地，又指胸怀宽阔，海纳百川。“至”是达到。“至诚”是指对自己，要诚实；对他人，要诚恳；对国家和社会，要诚信。唯诚信，信而有德，才有对国家和事业的忠诚，才能爱岗敬业，才可能善作善成。“至博”是指博学、博思、博大。“至诚至博”不但体现了中国优秀传统文化和时代精神的有机结合，更贴合了社会主义精神文明建设的要求和方向。诚实有德、博学有才，又红又专，德才兼备。 “至诚至博”的校训，凝结着学校艰难曲折的办学历程，承载着科大人忠诚党的教育事业的历史印记，陕科大每一位师生都自觉把“至诚至博”作为团结奋斗、拼搏创新的精神旗帜，在推动学…
782	Xi’an Polytechnic University	厚德弘毅、博学笃行	MOR0; MOR1; SCH; ACT	学校始终秉承“实业报国，负重奋进”的办学传统，深入践行“厚德弘毅、博学笃行”的校训，踔厉奋发，薪火相传，积淀形成了“团结、勤奋、求实、创新”的良好校风，铸就了“崇真尚美、经纬天下”的大学精神，培养了大批德才兼备的优秀人才。
783	Chang’an University	弘毅明德、笃学创新	MOR1; MOR0; SCH; INNO	“弘毅”“明德”“笃学”“创新”四词分别出自《论语》《大学》《三国志》等典籍。 弘毅：远大的抱负、矢志不移的精神。 明德：美好的道德情操。 笃学：专心致志、躬学践德的品格。 创新：不拘一格、大胆求异的致思方法。 崇高的理想是人生最强大的内源性动力，完美的德行是最宝贵的生存智慧和交往理性，躬学践德是知识分子最有价值的生活方式，革故鼎新是学问创造的不竭源泉。 “弘毅明德”是现代大学共有的教育理念，“笃学创新”是高水平人才培养的基本方法论原则。
784	Northwest A&F University	诚朴勇毅	MOR1; MOR1; MOR1; DIL	诚：诚者，信也，真实无妄之谓，为人处事，须以诚为本。 朴：朴者，质也，少私厚道之谓，博学经世，须以朴修身。 勇：勇者，气也，刚心锐志之谓，创新创业，须以勇求进。 毅：毅者，力也，不达不止之谓，任重道远，须以毅建功。 “诚朴勇毅”四字校训，集中反映了西北农林科技大学践行“经国本、解民生、尚科学”的办学理念和立志为我国农业科教事业的发展全力奉献的精神风貌。
785	Shaanxi University of Chinese Medicine	精诚仁朴	DIL; MOR1; MOR1; MOR1	学校秉承“精诚仁朴”校训，坚持“文化铸校”战略，积极传承延安精神、弘扬邵小利英烈风范、发挥国医大师楷模作用、弘扬“伟大抗疫精神” 等独具特色、润物无声的文化育人模式。
786	Shaanxi Normal University	厚德、积学、励志、敦行	MOR0; SCH; WILL; ACT	“厚德”一词语出《周易·坤卦》：“《象》曰：地势坤，君子以厚德载物。”意为大地具有广厚之德，所以无所不载。即在教育工作中坚持育人为本、德育为先，把学生优良品德的养成始终置于教育教学工作的首位，同时倡导广大教职工以身示范，立德树人。 “积学”一词见《文心雕龙·神思》：“积学以储宝，酌理以富才。”意为积累学问。即倡导学生以学习为天职，勤奋好学，刻苦攻读，努力掌握科学文化知识；同时提倡教师树立终身学习的理念，努力做到精通业务，钻研学问。 “励志”一词见汉班固《白虎通·谏诤》：“励志忘生，为君不避丧生。”意为奋志，集中心思致力于某种事业。即引导广大师生员工志存高远，追求卓越，并在学习和工作中具有坚忍不拔、顽强拼搏、锐意进取的意志品质。 “敦行”一词始见于《礼记·曲礼》：“博闻强识而让，敦善行而不殆，谓之君子。”“敦”是敦促、勉励的意思，“敦行”就是勉力去做，强调动手的能力、实践的作风和对道德的践…
787	Yan’an University	立身为公,学以致用	MOR3; SCH; ACT	释义：“立身为公”的两个核心概念是“身”与“公”。“身”的社会学本意是身份，同时隐含人格品质、道德学养等引申义。具体讲就是通过人格品质、道德学养的修炼，使自身能够成为被社会认可的一种身份或角色。“公”的本意是公共，这在上古和现代社会的话语系统中是相通的，如原始公社、共产主义以及中国士大夫理想中的大同社会均以“公”之本意来立意。在近代社会，“公”字又引申出了“公平”、“公正”等含义，显示了自我人格与公共社会的一体性联系。创办于1940年的延安大学最早前身学校陕北公学之“公”，融汇了“公”的上述所有含义。 孔子说“三十而立”，就是我们所谓的“立身”。“立身为公”意思是培养树立“公平”、“公正”、以天下为已任的大公无私品质。这又自然契合了陕北公学的传统。 “ 学以致用”的核心概念是“学”与“用”。“学”是学习、学业，“用”是实践、运用。“学以致用”，从主观上讲是将学习的目的建立在实际运用的基点…
788	Shaanxi University of Technology	明德、砺志、博学、笃行	MOR0; WILL; SCH; ACT	“明德”出自《大学》开篇“大学之道在明明德，在亲民，在止于至善。”指要具备崇高的品德和完备的人格。“砺志”指要能够经受艰难环境的磨砺，磨砺出身处秦巴、心怀天下、报效祖国的远大理想和志向；磨砺出追求真理、敢为人先、勇攀高峰的志气；磨砺出不畏艰难、艰苦奋斗、自力更生的坚强意志。“博学”出自《论语∙子张》“博学而笃志，切问而近思”，指要学识广博，兼容并包，博采众长。“笃行”出自《礼记∙中庸》，指要明确目标、坚定信念，并坚持不懈付出行动。校训意在要求师生学识广博、胸怀宽广、全面发展，树立远大志向，追求真理、敢为人先，锻炼艰苦奋斗、自力更生的坚强意志，做到学以致用、知行合一，通过脚踏实地的行动实现人生理想和抱负。
789	Baoji University of Arts and Sciences	博文明理，厚德尚能	SCH; MOR1; MOR0; PROF	“博文”是孔子在《论语》中教育弟子语“君子博学于文，约之以礼”的缩语，意为勤奋读书，努力掌握文化科学知识，达到学问渊博。博文是对我院师生最基本的要求,具有夯实人生知识根基的重要意义。 “明理”是《二程语录》“物理须是要穷”的缩写与改写,意谓认真思考,努力探索自然规律与社会规律，理性地对待社会与人生。明理是在博文的基础上对我院师生员工进一步的要求,具有训诚师生学习不可停留于表象，更要深入钻研认识事物本质。 “厚德”语出《易·坤卦·彖传》“地象坤，君子以厚德载物”，与《易.乾卦.彖传》“天行健,君子以自强不息”语相呼应。原意强调人生既要象天一样运行刚健有力，奋发图强，绝不停止,又要象大地一样具有敦实深厚的品德，承载万事万物。自不息、厚德载物是中华民族的传统美德。大学师生既要学高为师，更要行为世范，具有以爱国主义为核心的民族精神，遵法守纪,行为文明，成为社会的楷模。“厚德”是对我院师生员工的品…
790	Xianyang Normal University	厚德、博学	MOR0; SCH	校训是学校历史和文化的积淀，是学校精神和灵魂的象征，是学校办学理念的集中体现，是师生员工共同遵守的行为规范和基本准则。校训对于激励师生员工弘扬传统、开拓创新、奋发向上，增强荣誉感、责任感和使命感，具有特殊的意义。 “厚德”一词，语出《易·坤卦》：“地势坤，君子以厚德载物”。在先哲们看来，唯有“德行宽厚、有仁义之心”，方能立足于天下，获得生命之“至道”。“厚”也有推崇、重视之意。所以，“厚德”就是要求人们重视自己的道德和品行，自觉向有德行的人学习，不断塑造自己的良好品质。 “博学”则见于《论语》及《礼记》。《论语·子罕》中有言：“达巷党人曰：大哉孔子！博学而无所成名。”以此来赞扬孔子的渊博学识和高尚品行。《礼记·中庸》十九章有云：“博学之，审问之，慎思之，明辨之，笃行之”。以此来说明为学的几个层次或阶段。“博学之”意谓为学首先要广泛地猎取，培养充沛而旺盛的好奇心。“博”还意味着博大和宽容，…
791	Weinan Normal University	经世致用、和而不同	MOR3; ACT; INCL	学校秉承“扎根渭南，深耕教育，培养新时代大国良师”办学理念，是渭南市最高学府、人才中心、创新高地、开放窗口，被誉为秦东地区教师摇篮。 渭南师范学院肇始于1923年，前身赤水职业学校和“抗大式”的赤水农业职业学校，在特殊历史时期谱写了“青马”红校血与火的历史，是陕西省第一个团组织诞生地，是关中第一个党组织诞生地，也是渭华起义重要策源地。历经20世纪50年代末到60年代初的渭南师范学院、改革开放以来的渭南师范专科学校与渭南教育学院、新渭南师范学院，沧桑九十四载。 走进校门，映入眼帘的学校校训壁，上面镌刻着校训“经世致用，和而不同”八个大字。校训壁的背面，“天天奋斗，天天快乐”的学校精神在晨光中熠熠生辉。 学校传承“坚定创业创新”为核心的渭华照金精神，坚持先进文化育人的核心理念，努力培养具有科学信仰、科学能力、科学品质、科学精神等科学素养的社会主义事业建设者和接班人。
792	Xi’an International Studies University	爱国、勤奋、博学、创新	MOR3; DIL; SCH; INNO	为适应我国社会发展和经济建设的需要，学校将紧抓国家高等教育大发展、“一带一路”倡议和对外开放战略的历史机遇，秉承“爱国、勤奋、博学、创新”校训，弘扬“博古通今、融贯中外、德善相济、自强不息”西外精神，“立足陕西，服务西北，辐射全国，面向世界”，坚持走开放式、国际化办学道路，不断深化综合改革，奋力追赶超越，努力为把学校建成外语特色鲜明、多学科协调发展的高水平教学研究型大学不懈奋斗！
793	Northwest University of Political Science and Law	严谨、求实、文明、公正	DIL; ACT; MOR1; MOR2	校训，体现着大学文化的核心内容，既是学校办学理念、治校精神的高度概括，也是教风、学风、校风的集中表现;既是学校内在灵魂的高度凝练，也是学校传统的历史积淀;既是学校风貌的精神标志，也是师生共同遵守的基本准则与道德规范。我校的校训是“严谨、求实、文明、公正”。它的具体含义是，严谨的治学态度，求实的工作作风，文明的道德情操，公正的法律价值。体现了严谨的科学精神、求实的传统精神、文明的时代精神和公正的法律精神的结合，大学精神的普遍性和政法大学特殊性的结合，历史性和时代性的结合，理论性和实践性的结合。具体来讲，“严谨”体现了治学、办学的科学态度和科学精神;“求实”体现了对老延大和延安“实事求是”精神的继承和发扬;“文明”体现了时代精神和道德风貌;“公正”体现了法律价值和法律工作者的基本道德准则。这是一代代西法大前辈留给我们的宝贵精神财富，是值得每个西法大人用毕生时间去思索和践行的人生指南。
794	Xi’an Physical Education University	严谨创新,团结拼搏	DIL; INNO; MOR2; WILL	西安体育学院将以习近平新时代中国特色社会主义思想和党的二十大精神为引领，按照学院“十四五”规划总体目标，实施“123510”发展路径，秉承“严谨创新，团结拼搏”的校训，坚持“笃学重教，造就人才，服务体育，福佑人民”的办学宗旨，高举旗帜，凝心聚力，追赶超越。 校风、校训、办学理念： 西体校风：诚厚、务实、进取、奉献。 西体校训：严谨、创新、团结、拼搏。 西体精神：诚厚俭朴、勤奋刻苦、团结拼搏、求实创新、爱国荣校。 办学类型定位、人才培养层次定位： 办学类型定位：教学研究型体育大学。 人才培养层次定位：以本科教育为主，积极发展研究生教育，适应社会需要适度发展继续教育、留学生教育。
795	Xi’an Conservatory of Music	明德教化、乐音至善	MOR0; PROF; MOR	校训引自《礼记•大学》、《荀子•王制》和《礼记•乐记》等古代典籍，彰显光明正大的仁爱道德，发扬大学的教化功能；高奏治世安乐和谐之音，努力使音乐所通达的至高目标成为人类终极的尽善尽美境界。 西安音乐学院“明德教化、乐音至善”的校训确立于2009年。“明德”出自《礼记·大学》“大学之道，在明明德，在亲民，在止于至善。”“教化”出自《荀子·王制》“正身行，广教化，美风俗。”“乐音至善”出自《礼记·乐记》“治世之音安以乐，其政和；乱世之音怨以怒，其政乖；亡国之音哀以思，其民困。”校训意为：彰显光明正大的仁爱道德，发扬大学的教化职能，努力使音乐所通达的至高目标成为人类终极的尽善尽美的境界。 校训高度凝炼了学校的办学理念、文化精神、音乐特色、道德追求，反映了西音人共同的理想与追求。作为“文化名片”，它凝结着学校深厚的文化传统和文化精神。”
796	Xi’an Academy of Fine Arts	弘美厚德、借古开今	PROF; MOR0; INNO	校训意为继承和发扬中华民族自强不息的伟大精神，弘美扬善，树立为国家的繁荣昌盛不断进取、积极奉献的伟大志向，以高尚的道德品格，严谨的治学态度，努力探求事物发展的客观规律；同时立足中华优秀传统文化，培根铸魂，立德树人，描绘时代精神图谱，为时代画像、为时代立传、为时代明德，不断探索推进新时代中国特色美术教育蓬勃发展。
797	Xi’an University	重德、笃学、躬行、崇高	MOR0; SCH; ACT; WILL	重德 重视品德修养，弘扬优良品德。语出《大学》：“大学之道，在明明德，在亲民，在止于至善。”东汉文中有“重德轻身”。“重德”与党的十八大提出的“把立德树人作为教育的根本任务”和“育人为本，德育为先”的精神相符合。 笃学 专心好学，刻苦专研，树立终身学习理念。语出《论语·泰伯》：“笃信好学，守死善道。”“笃学”不仅是对学生的要求，也是对教师的要求。“笃学”与符合党的十八大提出的建设“学习型社会”的要求。 躬行 身体力行，亲身实行，强调实践应用能力。语出《论语·述而》：“躬行君子，则吾未之有得。”陆游《冬夜读书示子聿》中说：“在纸上得来终觉浅，绝知此事要躬行。”“躬行”与我校培养实践能力强的应用型人才的定位相符合。 崇高 崇尚高远，追求卓越，按照高标准来要求。语出《水经注·淇水》：“石壁崇高，昂藏隐天。”“崇高”与我校“一高一实”的工作原则和追求更高、更远的境界，培养高质量人才的目标相一致。…
798	Yulin University	读书勿忘救国，救国勿忘读书	MOR3; SCH	榆林学院从绥德师范走来，是一所历史悠久、底蕴厚重、孕育革命的学校。1924年北大毕业的李子洲就任省立第四师范学校（简称绥德师范）校长，提出“求学勿忘革命，革命勿忘求学。如求学而忘革命非真求学，革命而忘求学非真革命”，就此，以李子洲为代表的中国共产党人坚守“读书报国”的育人初心，在绥德师范掀起了一场革命教育和教育革命，使绥德师范成为“革命英才的摇篮”“西北革命策源地”。从1923年建校到1924年李子洲教育改革，1958年榆林学院创立，到2017年两校合并，一路走来，学校始终坚守百年初心，坚持“读书报国”育人理念。立足新时代，学校以立德树人根本任务为出发点，以教育为人民服务、为中国共产党治国理政服务、为巩固和发展中国特色社会主义制度服务，为改革开放和社会主义现代化建设服务为根本遵循，以“读书报国”育人理念为核心，教育引导莘莘学子赓续红色血脉，传承红色基因，做有理想、有本领、有担当的中国特色…
799	Shangluo University	博闻强志、正道直行	SCH; WILL; MOR1; ACT	学校的校训语出《史记》，意为博学广鉴，融会贯通；秉性刚直，行为端正。
800	Ankang University	笃学、尚行、砺志、创新	SCH; ACT; WILL; INNO	阐释：《论语·子张》篇有“博学而笃志”句，借其意而用之，化为“笃学”、“砺志”作为我校校训的主旨，以切合我校实际。 “笃学” 我校是新建教学型本科院校，学风、教风建设处在转型时期，学生素质、师资队伍、管理服务水平都有待提高，故而以“笃学”倡导师生袪除浮躁之气，杜绝急功近利的思想，坚定踏实、专心致志地追求知识、追求真理。 “尚行” 意在期望我校师生注重实践、勇于实践、善于实践，理论与实践相结合，产、学、研相结合，“躬行践履”，走与工农、与地方经济社会发展相结合的成长之路，炼就“服务基础教育、服务区域经济，服务 ‘三农’”的能力。 “砺志” 是从我校地处经济、文化相对落后的偏远山区的实际出发，期望我校师生持守“艰难困苦，玉汝于成”的信念，立志，明志，砺志，勇敢面对可能出现的困难和挑战，树立振兴中华民族的使命感与富强家乡的责任感。 “创新” 是中华民族实现伟大复兴的内驱力，培育创新精神，是新时…
801	Xi’an University of Finance and Economics	博学、明理、立诚、济世	SCH; SCH; MOR1; MOR3	“博学”出自于《论语·子张》篇，“博学而笃志，切问而近思。”《礼记·中庸》也有“博学之，审问之，慎思之，明辨之，笃行之”之说。“博学”指广泛学习，也指学问渊博，还有文化或学业上兼容并包之意，“博学”旨在倡导学校师生努力学习，博采众长，追求广博的学识和渊博的学问。 “明理”意指明学理，明事理，明做人的道理。 “立诚”即倡导全校师生树立以“诚”为核心的道德情操，同时也体现学校坚持一贯的“诚信”教育之特色。 “济世”原意为救助世人，旨在倡导师生树立远大理想，以己之学为人民、为社会、为国家作出贡献。
802	Xi’an University of Posts & Telecommunications	爱国、求是、奋进	MOR3; SCH; WILL	西安邮电大学一直秉承“爱国、求是、奋进”的校训，发扬“艰苦奋斗、自强不息、开拓进取”的西邮精神，在“重德务实、博学笃行、宽厚包容、民主和谐”的优良校风和“自由、求真、融合、创新”的学术文化氛围中，肩负中华民族伟大复兴的历史使命，汇聚天下，培育英才，为国家经济社会发展和信息化建设做出了重大贡献，赢得了良好的学术声誉和社会声望。 西安邮电大学校长卢建军谈校训：内化于心、外化于行 “西安邮电大学的校训是‘爱国、求是、奋进’，虽然是六个字但是凝聚了几代西邮人的心血。”卢建军校长对记者开门见山说到。 上个世纪五十年代初，随着国家进入全面经济恢复时期，为了迅速发展人民邮电事业，急需培养邮电业务管理和技术人才，国家决定在全国部分省市设立邮电培训班，西安邮电大学的前身陕西省邮电人员训练班在西安成立。“爱国，是西邮人从建校就开始的遵旨。西安邮电大学的发展和国家的发展命运在一起，就是要让我们要有为国奉献、矢…
803	Xi’an Aeronautical Institute	德能日新、刚健有为	MOR0; PROF; WILL; ACT	航空报国精神塑造师生价值追求： 航空报国精神锻造学校基因。学校始终坚持把航空报国精神作为鲜明的精神底色，深深融入血脉基因，在长期办学实践中，凝练形成了“德能日新、刚健有为”的校训，“严谨、求实、勤奋、创新”的校风，“航空报国、立德树人、激情进取、志在超越”的学校精神，“特别敬业、特别负责、特别朴实、特别团结”的师德师风和团队精神，一代代西航人怀揣着航空报国、航空强国的信念砥砺前行。学校坚持用航空文化浸润、感染和熏陶师生，建成航空文化博物馆、航空科技馆、校史馆、飞机广场等航空特色文化场馆，以航空元素为主基调设计布置学校视觉识别系统，以展示航空历史、机型、人物为主布置走廊和教室文化，航空文化要素和学校精神标识随处可见、触手可及，学生竞相争做航空报国、航空强国的践行者的行动自觉不断彰显。每年有超过三分之一的毕业生加入航空类企事业单位，不少学生已成为行业发展的重要力量。
804	Xi’an Medical University	厚德博学、精益求精	MOR0; SCH; DIL	厚德博学：语出《易经》《中庸》；旨在勉励莘莘学子要成为一名合格的医疗卫生人才，要有高尚的思想品德和良好的职业道德；勉励每一位教职工在树人品、做学问中立言立德立行，成为知行合一，德才兼备的合格教师。 精益求精：语出《论语》；旨在要求每位学子，勤学钻研，在专业技能上精益求精，努力成为一名全面发展的合格人才；要求每位教职工精于学问，做爱岗敬业、勤于育人、传道解惑的名师。
805	Shaanxi Xueqian NormalUniversity	厚德博学	MOR0; SCH	校训：厚德博学 出处：“厚德”出自《周易》： “地势坤，君子以厚德载物”。意谓：大地的气势厚实和顺，君子应增厚美德，容载万物。“博学”源自《论语.雍也》：“君子博学于文，约之以礼。其后，《礼记》又云：“博学之，审问之，慎思之，明辨之，笃行之。”意谓善学之人，广学博识、审时度势、慎终追远、明辨是非、笃行不悖。 核心思想：崇厚育人大德，广博教书真学。我国高等师范院校的核心任务是培养德才兼备的合格人民教师。教书育人是人民教师的根本任务和要求。“厚德博学”在高等师范院校的具体体现是培养高尚的育人德性和德行，培养广博的教书才能和学识。 现实意义：“厚德”表明我校的首要任务在于致力培养人的品行、道德、操守。德的内涵具有强烈的传统性和时代性，既有千年中华文明的德之龙脉，也有当今崭新社会德之荣辱。培养有高尚品德的社会主义合格人才，是我们的理想追求。博学，就能“海纳百川，有容乃大”。当教师亦当以“博学”为…
806	Lanzhou University	自强不息、独树一帜	WILL；INNO	兰州大学校训昭示了学校与时代同发展，与民族共命运，所走过的一百年风雨。一代代先贤和兰大人栉风沐雨，筚路蓝缕，自强不息，艰苦奋斗，坚守在祖国的西部，走出了一条在经济欠发达地区创建高水平大学的特色之路，形成了兰州大学特有的大学文化和大学精神。而校训则是这种文化和精神的集中体现。“自强不息、独树一帜”的校训，指引莘莘学子要传承学校优良传统，光大兰州大学精神，自强自立，顽强拼搏，敢为人先。
807	Lanzhou University of Technology	奋进求是	WILL；SCH	兰州理工大学的校训是“奋进求是”，这四个字既体现了学校的办学精神，也反映了学校的办学理念。 “奋进”二字表达了学校不断进取、开拓创新的决心和信念。作为一所具有深厚历史底蕴和优良办学传统的全国重点大学，兰州理工大学始终坚持与时俱进，不断进行改革创新，以适应时代发展的需要。同时，学校也注重培养学生的创新意识和实践能力，鼓励学生敢于尝试、勇于创新，为国家和社会的进步做出贡献。 “求是”二字则体现了学校追求真理、崇尚科学的办学理念。兰州理工大学一直以来都注重科学研究和社会服务，致力于提高学术水平和综合实力。学校坚持以科学为先导，注重科研成果的转化和应用，为社会提供了许多重要的科研成果和技术支持。同时，学校也注重培养学生的科学素养和人文精神，为学生未来的发展奠定了坚实的基础。 兰州理工大学的校训“奋进求是”具有深刻的意义和内涵。它不仅表达了学校的办学精神和办学理念，也鼓励师生不断进取、追求真理，为…
808	Lanzhou Jiaotong University	尚德、励志、博学、笃行	MOR0；WILL；SCH；ACT	校训是一个学校的灵魂。校训体现了一所学校的办学传统，代表着校园文化和教育理念，是人文精神的高度凝练，是学校历史和文化的积淀。 尚德：《易经.坤卦》：“地势坤，君子以厚德载物”（地势舒展，君子取法于地，以深厚的德行来成就事业）。“厚德”，即广厚之德，犹如“大德”；大地具有广厚之德，气势厚实和顺，故能载生万物。与此相对应，君子应增厚美德，容载万物。中华民族对于“道德”有着无比的崇敬。品德，是施教者和受教者必修的课程。只有每个人尚德，我们才可以形成善良、友好、互敬、互爱、互助的良好团队，我们才可以拥有高尚的人格、美好的情操、和谐的个性。 励志：巴斯德说：“立志是事业的大门。”王安石说：“世之非常、奇伟、诡怪之观，常在于险远，非有志者不能至也。”诸葛亮讲：“志当存高远”。立志也就是使一个人从大地上站立起来。从懵懵懂懂中清醒过来，从浑浑噩噩中悔悟过来，从芸芸众生中凸现来。生活不能没有目的，人生不能…
809	Gansu Agricultural University	敦品励学、笃志允能	MOR1；SCH；WILL；PROF	意在提醒每一个农大青年学子不断提高自身的道德修养，勤奋刻苦的学习，在对待道德提高和学业这两方面的事要一心一意，专心致志，在行动与态度上要对高尚的事、真知灼见等科学原理要充满敬畏与爱戴，学习知行统一。
810	Gansu University Of Chinese Medicine	勤奋、严谨、继承、创新	DIL；DIL；INNO；INNO	学校始终坚持社会主义办学方向，坚持立德树人根本任务，秉承“勤奋、严谨、继承、创新”的校训，坚持“立足西部求特色发展，传承仁术重开放办学”的办学理念，遵循“仁术勤和，玉汝于成”的育人理念，坚决扛起甘肃中医药高等教育和现代医学高等教育两面“大旗”，经过46载薪火相传和砥砺奋进，已实现“办学层次提升”和“办学空间拓展”两大目标，为甘肃乃至西北地区培养了七万余名高层次中医药和现代医学人才。
811	Northwest Normal University	知术欲圆，行旨须直	SCH; PROF；MOR1	1947年，曾任国立西北师范学院院长的黎锦熙先生为《国立西北师院毕业同学录》题词：“知术欲圆，行旨须直；大漠孤烟，长河落日。”并以他别具一格的国音字母书之。题词中“知术欲圆、行旨须直”句，深刻地揭示了知、术、行、旨之间的辩证关系，并取历史上形象反映西北地区自然风貌与人文特征的脍炙人口的诗句：“大漠孤烟直，长河落日圆”中“圆”和“直”两个意象，巧妙地表现出了对大学生的知、术、行、旨方面独特的精神期望。这则题词意韵深邃，儒雅考究，对仗工稳，特色鲜明。体现了深厚的中国传统哲学思想精华，备受历届师生的推崇与喜爱。 黎锦熙先生是我国著名的语言学家、教育家，1913-1914年曾任湖南省立第一师范学校历史教员，既是毛泽东的老师，也是“可与商量学问，言天下国家大计”的朋友。1919年，他到北京师大的前身北京高师任教，曾任北京师大国文系主任。1937年，随北京师大迁徙西北，任国立西北师范学院教务主任、国…
812	Lanzhou City University	手脑并用、创造分析	ACT；INNO	兰州城市学院以伟大的国际主义战士、中国工合运动先驱、著名教育家和社会活动家、培黎石油学校创始人路易·艾黎先生倡导的“手脑并用，创造分析”为校训，其内涵一是强化实践，能够运用知识，结合实际，切实提高动手能力；二是注重理论，强调理论与实践结合，运用理论指导实践；三是勇于创造，敢为人先，提出并分析解决问题；四是勤于思考，善于从表象入手，深入发掘事物的内涵与本质。 “手脑并用，创造分析”，承载着深厚的历史积淀，既是路易·艾黎先生教育思想的结晶，也是培养合格的应用型人才的至理名言。作为艾黎事业和艾黎精神的继承人，兰州城市学院将“手脑并用，创造分析”确定为校训，激励全校师生善于动手，勤于动脑，乐于分析，敢于创造，勇于实践，努力将其发扬光大，使其在新的时代里呈现出新的生命力，绽放新的光芒。
813	Longdong University	崇德尚实、自强不息	MOR0；ACT；WILL	学校以“崇德尚实、自强不息”为校训，以“勤奋、文明、求实、创新”为校风，以“崇德、卓越、敬业”为教风，以“博学、慎思、自强”为学风，以特色鲜明、优势突出、与区域经济社会发展良性互动的应用型大学为奋斗目标。
814	Tianshui Normal University	明德、新民、至善	MOR0；MOR3；MOR1	学校秉承“明德、新民、至善”的校训和“困境中求生存，奋斗中谋发展”的师院精神，立足自身实际，紧跟新时代高等教育发展步伐，初步形成了教师教育、工程技术、商务管理、文化体艺四大类应用型专业群，明确了立足陇东南、服务甘肃省、走向全中国的办学定位和主动服务国家战略与地方需求、主动接受地方党委政府领导、主动服务区域经济社会发展的办学思路，确定了建设师范特色鲜明的区域高水平应用型大学的办学目标。
815	HeXi University	明德尚美、求真笃行	MOR0；WILL；SCH；ACT	80年来，学校秉承“明德尚美、求真笃行”的校训，践行“以人为本、知行合一、止于至善”的治校理念，弘扬“追求卓越、自强不息”的学校精神，为地方经济社会发展做出了重要贡献。
816	Lanzhou University of Finance and Economics	博修商道	SCH；PROF	1.“博”取义广泛、博取、博爱，是对知识、能力、素养、人格等方面的综合要求； 2.“修”取义修养、修习、修炼，是对学习、实践、研究、提升等方面的持续追求； 3.“商”取义商业、商道、商务，是对学校办学定位、学科特色、人才培养等方面的精准聚焦； 4.“道”取义道德、道理、道路，是对价值取向、规律探索、成长路径等方面的系统指引。
817	Northwest Minzu University	勤学、敬业、团结、创新	SCH；PROF；MOR2；INNO	学校弘扬以“黄土地”和“黄河”为表征，以“朴实无华，甘于清贫，淡泊名利，无私奉献”和“志存高远，奔流不息，百折不挠，勇往直前”为核心的西北民族大学精神，恪守“勤学、敬业、团结、创新”的校训，以铸牢中华民族共同体意识为主线，走内涵式高质量发展之路，努力建设适应时代需要、特色鲜明的高水平现代化综合大学。
818	Gansu University of Political Science and Law	崇法致公，笃学善行	PROF；MOR3；SCH；ACT	“崇法致公，笃学善行”作为学校校训，集法治精神、人文精神和价值追求为一体，具有深厚的文化内涵，强调了学校的办学理念和办学特色，是广大师生的行为规范和精神标识。 “崇法”是一种追求，更是一种信仰。我校培养的人才既应该是学法、尊法的主力，也应该是守法、用法的模范。“国无常强，无常弱。奉法者强则国强，奉法者弱则国弱”（《韩非子·有度》），把“崇法”作为校训的词首，既充分体现了我校人才培养的理念和要求，也体现了政法院校的价值追求和社会责任。“致公”是政法类大学学人应该具有的志向，是一种社会责任和目标境界，是社会公平、公正、正义在集体意识和责任、个体意识和责任上的凝结。“崇法”和“致公”是追求和目标的统一，是信仰和价值的统一。 “笃学”是潜心钻研、强化自我、提升素质的途径，是一种求知的精神和认真的态度，是教风和学风的统一。“善行”是思想与行为的统一、是知识和能力的统一、是追求和行动的统一、是个人目…
819	Gansu Normal University For Nationalities	和合大美、自强不息	INCL；WILL	“和合大美，自强不息”是甘肃民族师范学院的校训，反映了该校多元文化共生共荣的生动景象。 “用中华优秀传统文化熏陶青年学生强‘底气’、用社会主义核心价值观塑造青年学生树‘正气’、用中国特色社会主义思想引领青年学生立‘志气’，激发青年学生服务国家、服务社会、服务他人的信心和决心，增强青年学生的文化自信和价值观自信。”甘肃民族师范学院宣传部部长丁一清说。 各美其美、美人之美、美美与共，甘肃民族师范学院多元包容的校园文化已经成为各族师生共同成长进步的精神家园。办学30多年来，甘肃民族师范学院已经培养了两万余名合格人才，在促进民族团结、维护民族地区社会稳定，加快民族地区经济社会发展、构建和谐社会中做出了应有的贡献。 “我们所有的工作，就是要培养政治坚定、业务精良、扎根基层、服务人民的各族人才，为民族地区文化教育和各项事业发展添砖加瓦、贡献力量。”甘肃民族师范学院院长陈正武表示。新时代新作为，甘肃民…
820	Lanzhou University of Arts and Science	明德强能、励志笃行	MOR0；PROF；WILL；ACT	“明德”出自《礼·大学》“大学之道，在明明德”，“明德”即完美的德性。学以人为本，学以德为尚，知识之道，重在人文，为人之道，重在人品，德为学首，德为校魂，德为立身之本，以德治校，乃学人之责、强校之道。大学的宗旨在于弘扬明正的品德，在于使人彻悟清新，在于使人达到最完善的境界。《孔子家语·在厄》曰：“芝兰生于浑林，不以无人而不芳，君子修道立德，不为困而改节”，当代知识分子应该具有高尚的道德修养，淡泊名利，守道忘势，全心致力于教书育人，治学治校，培养高素质人才。 “强能”即自强也,语出《周易》：“天行健，君子以自强不息。”“强能”深刻的自我激励意义 ,千百年来,自强不息已成为中华民族精神与民族性格的重要表征,在新的历史时期,只有“强能”才能与时俱进,其内涵要求教育工作者在改革发展和育人实践中,决策能力、行政能力、服务能力、科研能力、教授能力要以“强”为准则、以“强”为动力，造就成千上万适应改革…
821	Gansu Medical College	养德崇医，见贤思齐	MOR0；PROF；MOR1	“养德崇医，见贤思齐”的校训，既蕴含了中华优秀传统文化中人格修养的价值追求，又涵盖了社会主义人才培养的基本要求，向所有甘医师生昭示着努力的方向。 养德崇医：“养德”出自《庄子·天地》，意为修养德性；“崇医”意为敬畏医学。“养德崇医”从思想道德和职业道德两个方面对医者提出了要求，既体现了社会“医者仁心”的外在要求，又体现了个人“济世爱人”的价值内化。“养”“崇”也动态地展现了随着社会的发展，医者对自身品德和医术不懈追求的精神。 见贤思齐：出自《论语·里仁》，指见到贤德的人就要学习，以人之长、补己之短；“见不贤而内自省”，历代大医家都将“医人”“医国”作为人生理想，以别人的过失为鉴，自警自省，是在人格修养方面自强不息的表现。校训倡导以古今中外的大医为楷模，助学生专业成才、精神成人，促教师德性成蹊、业务成长。 附释： 校训以我校65年办学历史为底蕴，紧扣立德树人根本任务，牢记为党育人、为国育才…
822	Lanzhou Institute of Technology	开物成务、启智求真	SCH	2012年，教育部批准兰州工业学院正式成立，同年学校70周年校庆，学校在广泛征求意见的基础上，反复讨论酝酿，正式确定学校的校训为："开物成务 启智求真"。 “开物成务”出自《周易·系辞上》，子曰：“夫《易》开物成务，冒天下之道，如斯而已者也。” “是以明于天之道，而察于民之故。”“以通天下之志，以定天下之业，以断天下之疑。”“开”为了解、开通之意；“物”指天下万物，客观存在；“成”为掌握、熟悉之意；“务”指事务。“开物成务”意为通晓万物之理，按规律行事，从而得到成功。 “启智求真”的“启”为启发开导之意；“智”指智慧、智能；“求”指追求、探究；“真”为真理、规律之意。“启智求真”意为开启智慧、探索规律、崇尚科学、追求真理，是大学精神的本质所在。大学师生的责任不仅是传播或接受已有的知识，更应不断地探索世界，探究时代规律，以求知、怀疑、批判和创新的精神，求真务本，这样才会与真理结缘，认知科学…
823	Lanzhou Petrochemical University of Vocational Technology	锲镂金石、修身诚化	DIL；MOR1	锲镂金石 修身诚化 定义：校训是学校在长期办学实践中形成的，对全校师生具有规范、警策和导向作用的整体价值取向、独特气质、文化底蕴，蕴含师生的道德理想、人格特点和历史责任。 阐释： “锲镂金石，修身诚化”，一则嵌入“金诚”（诚通城），兰州古称“金城”，彰显出了学校的文化渊源及地域特色。二则融入修身之要求，鞭策人人提升道德境界，追求高尚情操，更加完善自我。三则融入化育之功，彰显出职业教育的教化魅力。 锲镂金石：锲：雕刻，用刀刻划；镂：镂空，雕刻出穿透物体的花纹或文字。金石：金属和顽石，凡指雕刻工艺品所用的质地坚硬的材料。锲、镂都有雕刻之意。锲镂金石，源自《荀子·劝学》的名句“锲而不舍，金石可镂”。意为锲而不舍，精雕细刻，将坚硬的金属和石头雕刻成精美的成品。寓意教师要在职业教育上更有恒心和毅力，力求有所建树；鞭策学生要有金石可镂的执着，能够勤学真知，勤练技能。 修身诚化：《礼记·大学》：“物格…
824	Lanzhou University of resources and environment	品质至上	PROF	品质至上：意指奋发有为，积极上进，开拓创新，力求卓越。是学院的人才培养标准和特色的体现，也是学院倡导并遵循的价值追求和教育宗旨。 校以来，学校秉承“艰苦奋斗 永不放弃”的办学精神，凝炼形成了“和谐教育”的办学理念、“品质至上”的校训、“求真务实”的校风、“立德树人”的教风和“知行合一”的学风，扎实推进育人方式、办学模式、管理体制、保障机制改革，成功跻身全国高职院校“第一梯队”，学校发展质量和效益创造了甘肃高职教育的“资环样板”，学校的办学历程成为甘肃高职教育敢为人先和艰苦创业的“一面旗帜”。
825	Qinghai University	志比昆仑、学竞江河	WILL；SCH	切青海地域特点。 立德立志如莽莽昆仑崇高俊逸、超凡脱俗； 求知求学如长江黄河奔流不息、百折不回、汇纳百川、源远流长。
826	Qinghai Normal University	勤学修德、为人师表	SCH; MOR0; PROF	校训征集：校训是大学精神的核心，为进一步适应建设教学研究型综合性大学需要，凝聚反映时代特征的文化和精神，我校现面向社会公开征集青海师范大学新校训。热忱欢迎广大校友以及社会各界人士贡献智慧和创意！ 要求： 1、新校训应兼顾学校历史积淀的优良传统和面向未来的价值取向，能把握时代潮流、彰显学校特色、体现人文精神； 2、语言简洁凝炼，内涵丰富，寓意深远，有较强的感染力、昭示力和凝聚力； 3、创意和命名符合国家法律法规，不得侵犯他人著作权，如涉及抄袭、侵权等由作者本人承担责任； 4、学校有权对征集的作品作适当修改，一经采用，其著作权、修改权及使用权归青海师范大学所有； 5、提交校训建议方案时需附上提交该方案的内容出处、释义、寓意等的详细说明。 学校以“服务国家和地方经济社会发展”为使命，坚持“以生为本、以师为尊”的办学理念，以“勤学修德、为人师表”为校训，以“培养基础教育师资以及推动国家、民族与人…
827	Qinghai Minzu University	进德修业、自强不息	MOR0；PROF；WILL	“进德修业、自强不息”，这是青海民族大学的校训，也是青海民族大学一以贯之的教育理念。党的十八大以来，青海民族大学紧紧围绕立德树人根本任务，构建“全员育人”工作机制，开设百场思政教育讲座，评选师生“进德修业之星”，引导学生正确看待金钱，探讨人生目标，培养品德情趣，有效增强了思想政治教育的针对性、实效性和感染力。扎西东智的感人事迹只是青海民族大学贯彻“立德树人”教育理念的一个缩影。 立德树人，“德”字为先。在工作中，我深深感到，诚实公正、负责守纪、敢于担当等良好品德是一个人成才的前提。抓住了高校思想政治工作这条生命线，就能更好地营造正气充盈、清正廉洁、健康向上的教学环境。【中央纪委监察部网站——校长何峰:立德树人,"德"字为先】
828	Ningxia University	尚德、勤学、求是、创新	MOR0；SCH；SCH；INNO	尚德——《论语》:“君子哉若人！尚德哉若人！”崇德向善，志存高远。情怀高洁，人格健全。 勤学——《韩诗外传》:“孟子惧，旦夕勤学不息。”专心致志，自强不息。兼收并蓄，融会贯通。 求是——《汉书》:“修学好古，实事求是。”追求真理，崇尚科学。穷本溯源，辨伪存真。 创新——《周书》:“创新改旧，方始备焉。”奋发有为，革故鼎新。敢为人先，追求卓越。
829	Ningxia Medical University	修德济人、笃学精术	MOR0；MOR3；SCH；PROF	“修德”：培养高尚的道德情操，养成良好的职业操守，追求美好的职业境界。主张：教师应注重修身、修心，具备严谨求是的工作作风，培养高尚的师德师风，做到严以律己、为人师表。学生应注重文明道德修身，具备公平诚信的社会公德，培育崇高的职业道德，做到言行一致、表里如一。 “济人”：渡化人、引导人、培育人、塑造人，用高明的医术和优秀的品德使世人受益。主张：教师应关心、爱护学生，坚持一切以学生为中心，通过自身精深广博的专业知识及尚德尚学、言行一致的崇高职业道德，引导学生成为坚持职业操守、维护社会公德、遵守社会规范的模范和示范者；学生要谨记救死扶伤的誓言，形成团结互助、关注他人、热爱生命的观念，使自己心存仁爱之心，树立人道之责，胸怀救济世人的宏愿，使自己在将来的工作中以人为本，更多关注病人、爱护病人。 “笃学”：专心致志、求真务实地学习广博的知识。主张：教师应树立终身学习的理念，刻苦学习专业知识，忠实于科…
830	Ningxia Normal University	学高为师、身正为范	SCH；MOR1	校训征集：马林院长指出，校训是一个学校的名片，它集中反映了学校人才培养的目标和治学的精神，校训的确立要符合当今社会对教师“高素质、专业化”的要求，要能体现文化底蕴并能传承特色；广场道路的命名应处理好雅与俗的问题，应考虑内涵并对师生员工有很好的引导作用。谢建勇书记对高校校园文化的内涵作了深刻的阐释，他指出：一种凝聚力量的精神、一个鼓舞斗志的校训、一首催人奋进的校歌是大学文化的有机组成部分，宁夏师范学院30多年的发展历程，已经形成了“艰苦奋斗、自强不息，不到长城非好汉的六盘山精神”，对校训的确立要与学校的发展定位相吻合，要有文化向心力，要彰显个性精神风貌，充分体现师范性质。他强调，胡锦涛总书记在清华大学百年校庆上的讲话、党的十七届六中全会为高校的文化传承和创新提出了新的要求，全校师生员工要积极行动起来，齐心协力，努力创建引领社会风尚的先进文化。 建校以来，学校深深根植于“西海固”这片热土中，…
831	North Minzu University	团结进取、砥砺成才	MOR2；WILL；DIL；WILL	学校植根宁夏，立足西北，面向全国，放眼世界办学。学校在长期的办学实践中，坚持铸牢中华民族共同体意识主线要求，始终秉承“团结进取、砥砺成才”的校训，继承“艰苦奋斗、同舟共济”的创业精神，发扬踏实、坚韧、执着、自信的“骆驼精神”，坚持“以人为本、自强不息”的办学理念，坚持“因材施教、追求卓越”的人才培养理念，各项事业取得了长足发展，在研究宣传党的民族理论政策、培养造就各民族优秀干部人才、服务支撑民族地区经济社会发展等方面做出了重要贡献，已成为涵盖博士、硕士、本科多层次学历教育、多学科协同发展的综合性大学，在西部具有一定影响力，为建成特色鲜明的高水平现代化综合大学奠定了坚实基础。
832	Xinjiang University	团结、紧张、质朴、活泼	MOR2；DIL；MOR1；WILL	1938年，新疆学院教务长林基路以延安“抗大”为榜样，提出了“团结、紧张、质朴、活泼” 八字校训。 抗日战争期间，著名共产党人俞秀松、林基路，著名爱国民主人士杜重远先后主持学校工作。他们以马列主义为指导，以“延安抗大”为榜样改造新疆学院，提出了“以民族为形式，以马列主义为内容”“教用合一”的教育方针，制定了“团结、紧张、质朴、活泼”八字校训。祁天民、李云扬、杨梅生、郭春则、茅盾、张仲实、史枚、江豪、涂治、赵丹等一批共产党人和爱国进步人士来校任教或讲学。学校全面系统传播马列主义，掀起了轰轰烈烈的抗日救国宣传运动，成为培养各民族爱国进步青年的摇篮，被誉为“抗大第二”，享誉全国。 新疆大学党委副书记、副校长姚强为我校全体新生做了题为《团结、紧张、质朴、活泼》的报告，报告会由校党委副书记孟凡丽主持。 姚强就新疆大学红色基因的内涵进行深入讲解，他说，一所学校首先为人所熟知便是她的校训，校训承载着一…
833	Tarim University	自强不息、求真务实	WILL；SCH；ACT	塔里木大学于1958年创建，原名塔里木农垦大学，是国务院学位委员会批准的首批具有学士学位授予权的本科院校，2003年获得硕士学位授予权，2004年5月经教育部批准更名为塔里木大学。原为农业部直属高校，现由新疆生产建设兵团管理。 学校发扬南泥湾光荣传统、抗大作风，秉承“自强不息、求真务实”的校训和“艰苦创业、民族团结、求真务实、励志图强”的校风，形成了以“艰苦奋斗、自强不息、扎根边疆、甘于奉献”为主要内涵的胡杨精神，彰显了“用胡杨精神育人，为兴疆固边服务”的办学特色，已成为一所以农为优势，多学科协调发展的综合性大学。
834	Xinjiang Agricultural University	明德笃志、励学竞业	MOR0；WILL；SCH；PROF	根据本科教育教学水平评估工作地要求，我校从２００５年５月起，在全校范围内开展了历时数月地教育思想教育观念大讨论。学校在认真调研，广泛征求意见，充分讨论地基础上，总结，提炼形成了能够反映我校特点的办学理念和思想，并提交校第八届二次教代会讨论审议，根据教代会意见，经校有关部门认真修改讨论后，于２００６年４月１１日提交校党委常委会讨论通过。 一 教育思想教育观念 理论联系实际，教学结合生产，主动适应新疆经济社会发展，培养具有创新意识的合格人才。 二 办学特色 以农为主，农,理,工,经,管,文,法等多学科协调发展，为新疆培养各民族应用型人才。 三 办学指导思想 以邓小平理论和“三个代表”重要思想为指导，坚持科学发展观，坚持以人为本，全面贯彻党的教育方针，遵循高等教育发展规律，立足新疆，面向三农，服务社会。 四 农大精神 自力更生，艰苦奋斗，求真务实，开拓进取。 五 校训 明德笃志 励学竞业 建校…
835	Shihezi University	明德正行、博学多能	MOR0；ACT；SCH；PROF	涵 义： 1．“明德”：明，光明，明亮；德，道德、美德。明德，意在使美德发扬光大。语出《大学》：“大学之道，在明明德，在亲民，在止于至善”。 2．“正行”：正，端正，符合标准；行，行为，行动；正行，意在使行为端正，举止符合礼仪规范。 3．“博学”：博，丰富，通晓；学，学问，学识；博学，是指学问广博精深。语出《中庸》：“博学之，审问之，慎思之，明辨之，笃行之。” 4．“多能”：多，很多，多种；能，能力，才能。多能，是指具有多方面才能。 优 点： 1．内涵丰富，辞意精炼。“明德正行，博学多能。”包揽了师生员工在品德、行为、学识、才能方面的要求。主旨明确，内涵丰富，辞精义达。 2．融古通今，文白兼有。八字校训古今融通，文白夹杂，既有历史感，又有现代感，既有内敛之力，又有外显之效。读之琅琅上口，思之回味无穷。 3．文理通用，雅俗共赏。八字校训不拘文理，不限科目，亦雅亦俗，深浅由人，专家学者不以为…
836	Xinjiang Medical University	好学、力行、笃医、创新	SCH；ACT；PROF；INNO	学校坚持社会主义办学方向，牢牢把握“培养什么人、为谁培养人、怎样培养人”的根本问题，紧扣立德树人根本任务，秉承“好学、力行、笃医、创新”的校训，全面履行培养高素质医学人才、开展医学科学研究、提供高水平医疗卫生服务的使命，努力建设西部一流并辐射中亚的医科大学。
837	Xinjiang Normal University	博学笃行、为人师表	SCH; ACT; PROF	新疆师范大学是党的十一届三中全会之后国家第一批新设立的高校之一，沐浴着党和国家改革开放的春风，四十多年来始终与改革开放同成长、共命运，走出了一条快速发展的路子。学校始终坚持社会主义办学方向，全面贯彻党的教育方针，落实立德树人根本任务，将社会主义核心价值观融入教育教学全过程；学校秉承“博学笃行，为人师表”的校训，始终以“为党育人，为国育才”为己任，为新疆经济社会发展特别是教师教育事业的发展做出了重要贡献。
838	Kashi University	和谐包容、励志图强	INCL；WILL；WILL	喀什大学坐落于中国历史文化名城、中国优秀旅游城市、素有“五口通八国、一路连欧亚”之称的喀什，是祖国最西部一所以培养基础教育师资和经济社会发展需要的应用型人才为使命的多科性本科学校。学校始建于1962年，始终秉承“胡杨般坚韧、红烛般奉献”的大学精神，凝练了“和谐包容、励志图强”的校训，积累了丰富的高等教育办学经验，形成了独特的办学特色，锻造了内涵深厚的大学精神和大学文化，培养了12万余名具有良好思想品德修养和扎实专业技能的基础教育师资和各类人才。
839	YiLi Normal University	品正学实	MOR1；SCH	品正：即志存高远，道德高尚，品行端正，自强不息。 学实：即学识渊博，基础扎实，学有所成，学以致用。 伊犁师范大学位于“塞外江南”——伊犁，是教育部、江苏省与新疆维吾尔自治区人民政府共建高校。长期以来，学校全面贯彻党的教育方针，坚持“用胡杨精神育人、为兴疆固边服务”，扎根边疆75载为社会培养输送了近7万多名各类人才，据统计，伊犁、塔城、阿勒泰地区60%中小学老师均毕业于我校。为区域经济发展、社会稳定、民族团结、边防巩固提供了智力支撑和人才保障，特别是为边疆基础教育事业做出积极贡献，被誉为“天山脚下人才摇篮 伊犁河畔教育名校”。 当前，学校正以习近平新时代中国特色社会主义思想为指导，坚持社会主义办学方向，落实立德树人根本任务，将铸牢中华民族共同体意识作为各项工作的主线，秉承“品正学实”的校训，传承“爱国、崇德、勤奋、求实”的校风、“学高身正、敬业树人”的教风、“勤学敏思、尚德弘志”的学风，努…
840	Xinjiang University of Finance & Economics	经世济公、至善至诚	MOR3；MOR3；MOR1；MOR1	经世济公 经：经营、筹划；世：世间、社会；济：救助、接济；公：公平、大众。经世济公就是筹划营谋好社会，做有益于人民和社会的事。结合学校实际，就是为社会培养人才，办人民满意的教育。 至善至诚 至：极、最；善：美好；诚：诚信。意思是无论做人、做事、做学问都要力争达到真善美的最高境界。
841	Xinjiang Arts University	传承创新,德艺双馨	INNO；MOR0; PROF	面向未来，新疆艺术学院党委将团结带领全校广大师生员工，在习近平新时代中国特色社会主义思想指引下，完整准确贯彻落实新时代党的治疆方略，在自治区党委领导下，继续秉承“团结、勤奋、敬业、尚美”校风和“传承创新，德艺双馨”校训，坚持走内涵建设、高质量发展道路，推进实施学校党委“一二三四”工作思路，即围绕一个目标（立德树人），坚持两个标准（德艺双馨），建设三支队伍（教师队伍、管理队伍和服务队伍），落实四个重点（以安全稳定为基础、以服务经济社会和文艺繁荣发展为导向、以内涵建设质量提升为重点、以改革创新为动力），朝着“特色鲜明、优势突出、立足新疆、服务全国、面向世界”的高水平综合性艺术高校宏伟目标努力奋进！
842	Xinjiang Institute of Engineering	知行统一、追求卓越	ACT；WILL	60多年来，学校秉承“艰苦奋斗，扎根边疆，自强不息，甘于奉献”的胡杨精神，培植了“知行统一，追求卓越”的校训。学校党委提出了“强党建、保稳定、抓改革、促转型、谋发展、创一流”的工作思路，遵循“五个坚持”、抓好“五个机遇”、提升“五个竞争力”、弘扬“五种精神”、做好“五个服务”，朝着三个“五年目标”团结奋斗，加快推进特色鲜明高水平应用型大学建设。
843	Changji University	惟德惟才 笃学笃行	MOR0; SCH; SCH; ACT	一、出处 德才，《资治通鉴》曰：“聪察强毅之谓才，正直中和之谓德。才者，德之资也； 德者，才之帅也。……才德全尽谓之圣人。” 笃学，《史记伯夷传》：“颜渊笃学”。《三国志〃吴志〃孙瑜传》：“济阳人马普笃 学好古，瑜厚礼之”。宋〃苏轼《邵茂诚诗集序》：“其为人笃学强记，恭俭孝友”。明〃邵 粲《香囊记〃讲学》：“三年笃学不窥园，刺股悬梁志亦坚。”明〃方孝儒《与郑叔度 书》：“中下淳明慈良，有君子之器，又笃学不倦，其至于古人也奚御，愿益加之意， 以果所望。” 笃行，《中庸》：“博学之，审问之，慎思之，明辨之，笃行之。”宋〃陆游《陆 伯政山堂稿序》：“伯政家世为儒，力学笃行，至老不少衰。” 二、诠释 德才兼备，是中华古训，也是今日党和人民对大学人才培养的理想与要求。“惟”， 既强调德才的独一性的崇高地位，即“惟一”，又具有思考反省，见德才而思齐的意 味，即“思惟”。 笃学，即专心致志地学习。大学…
844	Xinjiang Police College	忠诚、敏锐、博学、强健	MOR3；PROF；SCH；PROF	学院坚持服务新疆公安工作、服务新疆社会稳定和长治久安、服务总体国家安全战略，牢牢把握对党忠诚、服务人民、执法公正、纪律严明总要求，坚持“教学练战研一体化”人才培养模式，培养德智体美劳全面发展、适应国家反恐维稳斗争需要、符合新时代公安工作要求的“四个铁一般”应用型公安专门人才。 五年一贯制专科办学地点为新疆警察学院米东校区。主要承担安防、安全保卫管理学历教育和在职安防人员培训两大职能。 多年来，新疆警察学院米东校区秉持“忠诚、敏锐、博学、强健”的校训，坚持“对党忠诚、服务人民、执法公正、纪律严明”总要求，以“立德树人、教书育人、课大于天、培养忠诚卫士”的办学理念，依托新疆警察学院师资和教学资源，积极进行教育教学改革与探索，不断提高学历教育的影响力。
845	Xinjiang Institute of Technology	自强不息、追求卓越	WILL；WILL	学校秉承“自强不息、追求卓越”的校训，立足阿克苏，扎根南疆，面向全疆，放眼全国，坚持“用胡杨精神育人，为兴疆固边服务”的育人特色，培养适应区域经济社会高质量发展需要，具有创新精神、实践能力和社会责任感的高素质应用型人才。
846	Xinjiang Second Medical College	无	/	校训是学校办学历史、办学理念和文化内涵的集中体现，是学校精神和灵魂的象征。为适应学校发展需求，进一步深入挖掘、提炼学校的内在精神，增强师生的凝聚力和归属感，新疆第二医学院现面向社会各界征集校训设计方案。 要求： 1.遵循党的教育方针，体现中国特色社会主义大学为党育人、为国育才的担当与使命。 2.寓意深远，富有时代感、教育意义和激励作用，以富含哲理、言简义丰、朗朗上口、易于诵记为标准，作品应注明构思意图，注明出处。 3.充分体现学校办学特色和办学定位、人才培养目标、发展目标，要求简洁、凝练，字数不超过16字为宜。
847	Xinjiang University of Science & Technology	明德厚学、笃志尚行	MOR0；SCH；WILL；ACT	设计说明：前句“明德”出自《大学》：“大学之道，在明明德，在亲民，在止于至善”。明德的意思光明之德、美德，体现出人才“以德为先”的导向。“厚学”指深入致学，学识深厚。意思为：明德而厚学，即先恪守道德，与人为善，懂事明理，在此基础上崇尚知识，学以致用，是先成人后成才的道理。 后句“笃志”出自《论语·子张》：“博学而笃志，切问而近思，仁在其中矣。”笃志的意思是人无志不立，指专心一志、立志不变。“尚行”出自《皇极经世书·观物篇》：“尚行，则笃实之风行焉。”强调不但要在认识上有所提高，而且要身体力行。提倡实际行动，尊崇实践，运用知识服务社会。意思为：当代大学生应该充满蓬勃朝气，坚定志向，立足信仰，果敢坚毅，身体力行。我校作为应用技术型高校，要求学生既要明确自己的学习目标，积蓄学习动力，要立长志，不要常立志，同时，要将自己的实现理想志向落实到行动之中，立下长远的目标后，脚踏实地、矢志不渝地运用所学…
848	Xinjiang University of Political Science and Law	明德尚法，兴疆固边	MOR0；PROF；MOR3	征集公告：为大力加强校园文化建设，增强师生的凝聚力和归属感，激发广大师生团结奋进的责任感和使命感，发挥校训、校歌、校徽、校旗的功能，学校决定开展校训、校徽、校歌、校旗征集评选活动，活动公告如下： 活动目的： 校训、校徽、校歌、校旗是校园文化的重要载体，是体现和承载学校建设目标、职责使命、凝聚人心、激励师生、开拓创造的精神旗帜，是学校深层次的精神底蕴与人文内涵，是学校办学理念和校园文化的高度浓缩。开展校训、校徽、校歌、校旗征集评选活动，有利于激发全校师生建设校园文化热情，营造校园文化氛围，提升校园文化品位，促进一流政法学院创建。 校训评选标准： 校训是一个大学的灵魂，是一所大学人文精神和办学理念的高度凝练，良好的校训对内能形成文化向心力；对外是学校理念和精神面貌的缩影。其评选标准如下： 1.寓意深远。符合新疆政法学院教育思想和办学理念，以富含哲理、言简意赅而又朗朗上口、易于传诵为标准。作品…

## Sheet: Sheet1
普通高等学校（共12类）
综合类
理工类
师范类
医药类
语言类
财经类
农林类
政法类
民族类
艺术类
体育类
军事类
